# Supplementary material for: Elevated Expression of The RNA-Binding Protein IGF2BP1 Enhances The Mrna Stability and Translation Efficiency of INHBA to Promote The Invasion and Migration of Esophageal Squamous Cancer Cells
Source: Research Square preprint supplement (doi:10.21203/rs.3.rs-885735/v2), 2022-03-28
Supplement: Supplementary file 1 [file 20ef473ec6165a51e8d6493d.xlsx]

## Sheet: Table S9
Table S9. Relative mRNA expression of candidate genes after IGF2BP1 knockdown in KYSE30 and TE1 cells.
Candidate genes with decreased mRNA expression in both cell lines after IGF2BP1 knockdown are marked in red.
Sample Name	Target Gene	shIGF2BP1/shNS		Sample Name	Target Gene	shIGF2BP1/shNS
KYSE30	GAPDH	1		TE1	GAPDH	1
KYSE30	IGF2BP1	0.133151		TE1	IGF2BP1	0.187687
KYSE30	AKT3	0.773744		TE1	AKT3	0.593363
KYSE30	EGFR	0.840931		TE1	EGFR	0.652468
KYSE30	EGFR-AS1	0.806769		TE1	EGFR-AS1	0.700063
KYSE30	INHBA	0.762129		TE1	INHBA	0.464124
KYSE30	ITGA1	1.99685		TE1	ITGA1	1.3044
KYSE30	JAK1	0.830363		TE1	JAK1	0.907887
KYSE30	MAP4	0.918232		TE1	MAP4	0.904844
KYSE30	MAST2	0.784346		TE1	MAST2	0.720304
KYSE30	MET	1.10037		TE1	MET	0.823494
KYSE30	PRMT9	0.91507		TE1	PRMT9	0.752361
KYSE30	SRC	0.745384		TE1	SRC	0.69554
KYSE30	TGFB1	1.20795		TE1	TGFB1	0.955978
KYSE30	TGFBR2	0.796311		TE1	TGFBR2	1.79246
KYSE30	MYC	1.49316		TE1	MYC	0.915104
KYSE30	SOX9	1.33441		TE1	SOX9	1.39281
KYSE30	mTOR	1.1568		TE1	mTOR	1.86116
KYSE30	mTOR-AS1	0.731972		TE1	mTOR-AS1	0.966297
KYSE30	BCL2	1.34102		TE1	BCL2	1.00429
KYSE30	MALT1	1.04117		TE1	MALT1	0.719151
KYSE30	NRP1	2.04118		TE1	NRP1	0.574683
KYSE30	BMP4	1.05138		TE1	BMP4	2.09615
KYSE30	CAV1	0.537802		TE1	CAV1	1.12731
KYSE30	CAV2	0.716095		TE1	CAV2	1.14239
KYSE30	NRP2	1.1985		TE1	NRP2	1.57734
KYSE30	SMAD7	0.611751		TE1	SMAD7	1.22835
KYSE30	SMAD9	1.51204		TE1	SMAD9	1.67359
KYSE30	SNAI2	0.535037		TE1	SNAI2	0.705187
KYSE30	SOX12	0.937987		TE1	SOX12	1.24829
KYSE30	TGFB2	0.610344		TE1	TGFB2	1.05458
KYSE30	THBS1	0.37608		TE1	THBS1	1.40867
