# Supplementary material for: Elevated Expression of The RNA-Binding Protein IGF2BP1 Enhances The Mrna Stability and Translation Efficiency of INHBA to Promote The Invasion and Migration of Esophageal Squamous Cancer Cells
Source: Research Square preprint supplement (doi:10.21203/rs.3.rs-885735/v2), 2022-03-28
Supplement: Supplementary file 2 [file 87f11481476501149e87b1e9.xlsx]

## Sheet: Table S8
Table S8. List of candidate genes selected from RIP-seq.
Geneid	RIP_4h_rep1	Input_4h_rep1	logFC	logCPM	PValue	FDR	GO(GO_term,class,description)	KEGG(KO,pathway,description)
SMAD9	0.580891	0	6.60857	1.26255	0.000667207	0.00167536	GO:0071407,biological_process,cellular response to organic cyclic compound;GO:0003677,molecular_function,DNA binding;GO:0060395,biological_process,SMAD protein signal transduction;GO:0005667,cellular_component,transcription factor complex;GO:0005737,cellular_component,cytoplasm;GO:0007179,biological_process,transforming growth factor beta receptor signaling pathway;GO:0003700,molecular_function,D…	-
ITGA1	0.140691	0	6.26467	1.00757	0.00242129	0.00536972	GO:0008305,cellular_component,integrin complex;GO:0009986,cellular_component,cell surface;GO:0007155,biological_process,cell adhesion;GO:0009897,cellular_component,external side of plasma membrane;GO:0007160,biological_process,cell-matrix adhesion;GO:0016020,cellular_component,membrane;GO:0008285,biological_process,negative regulation of cell proliferation;GO:0042059,biological_process,negative r…	K06480,ko04151,PI3K-Akt signaling pathway;K06480,ko05414,Dilated cardiomyopathy;K06480,ko04810,Regulation of actin cytoskeleton;K06480,ko04512,ECM-receptor interaction;K06480,ko04510,Focal adhesion;K06480,ko04640,Hematopoietic cell lineage;K06480,ko05412,Arrhythmogenic right ventricular cardiomyopathy (ARVC);K06480,ko05410,Hypertrophic cardiomyopathy (HCM)
SMAD7	0.964762	0.0887496	3.31213	1.41726	0.00961124	0.0184048	GO:0031397,biological_process,negative regulation of protein ubiquitination;GO:0034629,biological_process,cellular protein-containing complex localization;GO:0060389,biological_process,pathway-restricted SMAD protein phosphorylation;GO:0033137,biological_process,negative regulation of peptidyl-serine phosphorylation;GO:0007179,biological_process,transforming growth factor beta receptor signaling …	-	`
BCL2	0.94863	0.139253	2.74258	2.86438	6.24e-06	2.48e-05	GO:0031103,biological_process,axon regeneration;GO:0051607,biological_process,defense response to virus;GO:0014031,biological_process,mesenchymal cell development;GO:0033138,biological_process,positive regulation of peptidyl-serine phosphorylation;GO:2000134,biological_process,negative regulation of G1/S transition of mitotic cell cycle;GO:0050790,biological_process,regulation of catalytic activi…	K02161,ko05222,Small cell lung cancer;K02161,ko05210,Colorectal cancer;K02161,ko04141,Protein processing in endoplasmic reticulum;K02161,ko01524,Platinum drug resistance;K02161,ko04725,Cholinergic synapse;K02161,ko05169,Epstein-Barr virus infection;K02161,ko01521,EGFR tyrosine kinase inhibitor resistance;K02161,ko04210,Apoptosis;K02161,ko04933,AGE-RAGE signaling pathway in diabetic complications;…
MTOR-AS1	4.66829	0.858882	2.38238	1.49272	0.0264707	0.0448508	GO:0007584,biological_process,response to nutrient;GO:0031641,biological_process,regulation of myelination;GO:0003007,biological_process,heart morphogenesis;GO:0051534,-,-;GO:0055006,biological_process,cardiac cell development;GO:0051896,biological_process,regulation of protein kinase B signaling;GO:0001932,biological_process,regulation of protein phosphorylation;GO:0010592,biological_process,pos…	K07203,ko01522,Endocrine resistance;K07203,ko04139,Regulation of mitophagy - yeast;K07203,ko05215,Prostate cancer;K07203,ko04072,Phospholipase D signaling pathway;K07203,ko04151,PI3K-Akt signaling pathway;K07203,ko01521,EGFR tyrosine kinase inhibitor resistance;K07203,ko05230,Central carbon metabolism in cancer;K07203,ko04920,Adipocytokine signaling pathway;K07203,ko04919,Thyroid hormone signalin…
EGFR	440.623	92.0841	2.25849	11.7028	7.9e-26	1.59e-23	GO:0016301,molecular_function,kinase activity;GO:0018108,biological_process,peptidyl-tyrosine phosphorylation;GO:0035556,biological_process,intracellular signal transduction;GO:0004716,molecular_function,signal transducer, downstream of receptor, with protein tyrosine kinase activity;GO:0016020,cellular_component,membrane;GO:0016740,molecular_function,transferase activity;GO:0004714,molecular_fun…	-
MAST2	9.76731	2.03828	2.25817	5.57177	5.64e-15	1.73e-13	GO:0004672,molecular_function,protein kinase activity;GO:0016301,molecular_function,kinase activity;GO:0006468,biological_process,protein phosphorylation;GO:0016740,molecular_function,transferase activity;GO:0016310,biological_process,phosphorylation;GO:0004674,molecular_function,protein serine/threonine kinase activity;GO:0045075,biological_process,regulation of interleukin-12 biosynthetic proce…	-
MAP4	11.7912	2.5436	2.21174	6.75756	8.48e-19	5.5e-17	GO:0005874,cellular_component,microtubule;GO:0005737,cellular_component,cytoplasm;GO:0005856,cellular_component,cytoskeleton;GO:0005886,cellular_component,plasma membrane;GO:0015631,molecular_function,tubulin binding;GO:0005829,cellular_component,cytosol;GO:0015630,cellular_component,microtubule cytoskeleton	-
MALT1	2.18857	0.48319	2.17198	3.94867	5.94e-08	3.68e-07	GO:0004197,molecular_function,cysteine-type endopeptidase activity;GO:0006508,biological_process,proteolysis;GO:0051092,biological_process,positive regulation of NF-kappaB transcription factor activity	K07369,ko04662,B cell receptor signaling pathway;K07369,ko04064,NF-kappa B signaling pathway;K07369,ko04660,T cell receptor signaling pathway;K07369,ko05152,Tuberculosis
EGFR-AS1	59.7459	13.3121	2.16507	6.69472	6.38e-18	3.52e-16	GO:0018108,biological_process,peptidyl-tyrosine phosphorylation;GO:0035556,biological_process,intracellular signal transduction;GO:0000166,molecular_function,nucleotide binding;GO:0005622,cellular_component,intracellular;GO:0007169,biological_process,transmembrane receptor protein tyrosine kinase signaling pathway;GO:0004714,molecular_function,transmembrane receptor protein tyrosine kinase activi…	-
SNAI2	27.0551	6.03062	2.16272	5.27755	8.86e-13	1.63e-11	GO:2000810,biological_process,regulation of bicellular tight junction assembly;GO:0043473,biological_process,pigmentation;GO:0043518,biological_process,negative regulation of DNA damage response, signal transduction by p53 class mediator;GO:0001078,molecular_function,transcriptional repressor activity, RNA polymerase II proximal promoter sequence-specific DNA binding;GO:0003676,molecular_function…	K05706,ko04520,Adherens junction;K05706,ko04390,Hippo signaling pathway
MYC	49.217	11.0277	2.15687	6.51538	2.57e-17	1.27e-15	GO:0001541,biological_process,ovarian follicle development;GO:0044344,biological_process,cellular response to fibroblast growth factor stimulus;GO:0046983,molecular_function,protein dimerization activity;GO:0048661,biological_process,positive regulation of smooth muscle cell proliferation;GO:0046982,molecular_function,protein heterodimerization activity;GO:0060252,biological_process,positive regu…	-
SOX9	7.24148	1.66538	2.11462	4.20828	1.72e-08	1.2e-07	GO:0007283,biological_process,spermatogenesis;GO:0034236,molecular_function,protein kinase A catalytic subunit binding;GO:0003179,biological_process,heart valve morphogenesis;GO:0003705,molecular_function,transcription factor activity, RNA polymerase II distal enhancer sequence-specific binding;GO:0000122,biological_process,negative regulation of transcription by RNA polymerase II;GO:0046982,mole…	-
PRMT9	2.12704	0.489172	2.10119	2.59967	0.000877812	0.00214079	GO:0035243,molecular_function,protein-arginine omega-N symmetric methyltransferase activity;GO:0019918,biological_process,peptidyl-arginine methylation, to symmetrical-dimethyl arginine;GO:0005737,cellular_component,cytoplasm;GO:0016740,molecular_function,transferase activity;GO:0006479,biological_process,protein methylation;GO:0035246,biological_process,peptidyl-arginine N-methylation;GO:0032259…	-
INHBA	0.51485	0.118404	2.08235	1.74174	0.0161862	0.0292403	GO:0001541,biological_process,ovarian follicle development;GO:0008083,molecular_function,growth factor activity;GO:0001942,biological_process,hair follicle development;GO:0042476,biological_process,odontogenesis;GO:0005102,molecular_function,signaling receptor binding;GO:0043512,cellular_component,inhibin A complex;GO:0048333,biological_process,mesodermal cell differentiation;GO:0045786,biologica…	K04667,ko04350,TGF-beta signaling pathway;K04667,ko04550,Signaling pathways regulating pluripotency of stem cells;K04667,ko04060,Cytokine-cytokine receptor interaction
JAK1	28.0802	6.63937	2.07953	6.791	3.74e-17	1.8e-15	GO:0038083,biological_process,peptidyl-tyrosine autophosphorylation;GO:0005102,molecular_function,signaling receptor binding;GO:0030154,biological_process,cell differentiation;GO:0005856,cellular_component,cytoskeleton;GO:0004672,molecular_function,protein kinase activity;GO:0005634,cellular_component,nucleus;GO:0016301,molecular_function,kinase activity;GO:0035556,biological_process,intracellula…	K11217,ko04550,Signaling pathways regulating pluripotency of stem cells;K11217,ko05160,Hepatitis C;K11217,ko05161,Hepatitis B;K11217,ko04151,PI3K-Akt signaling pathway;K11217,ko04380,Osteoclast differentiation;K11217,ko05169,Epstein-Barr virus infection;K11217,ko05140,Leishmaniasis;K11217,ko05162,Measles;K11217,ko05164,Influenza A;K11217,ko05152,Tuberculosis;K11217,ko04630,Jak-STAT signaling path…
MET	9.98554	2.42059	2.04228	5.48192	1.79e-12	3.06e-11	GO:0016301,molecular_function,kinase activity;GO:0018108,biological_process,peptidyl-tyrosine phosphorylation;GO:0007169,biological_process,transmembrane receptor protein tyrosine kinase signaling pathway;GO:0004714,molecular_function,transmembrane receptor protein tyrosine kinase activity;GO:0016310,biological_process,phosphorylation;GO:0004713,molecular_function,protein tyrosine kinase activity…	-
SOX12	15.7965	3.89233	2.01882	5.54244	1.46e-12	2.54e-11	GO:0006366,biological_process,transcription by RNA polymerase II;GO:0003677,molecular_function,DNA binding;GO:0045165,biological_process,cell fate commitment;GO:0006357,biological_process,regulation of transcription by RNA polymerase II;GO:0045944,biological_process,positive regulation of transcription by RNA polymerase II;GO:0006355,biological_process,regulation of transcription, DNA-templated;G…	-
TGFBR2	12.9735	3.20419	2.01506	5.28777	1.83e-11	2.5e-10	GO:0060389,biological_process,pathway-restricted SMAD protein phosphorylation;GO:0060443,biological_process,mammary gland morphogenesis;GO:0004702,molecular_function,signal transducer, downstream of receptor, with serine/threonine kinase activity;GO:0005886,cellular_component,plasma membrane;GO:0002666,biological_process,positive regulation of T cell tolerance induction;GO:0005026,molecular_funct…	-
MTOR	7.85721	2.05482	1.93353	5.93281	6.03e-13	1.15e-11	GO:0031641,biological_process,regulation of myelination;GO:0016605,cellular_component,PML body;GO:0003007,biological_process,heart morphogenesis;GO:0055006,biological_process,cardiac cell development;GO:0051896,biological_process,regulation of protein kinase B signaling;GO:0001932,biological_process,regulation of protein phosphorylation;GO:0010592,biological_process,positive regulation of lamelli…	K07203,ko01522,Endocrine resistance;K07203,ko04139,Regulation of mitophagy - yeast;K07203,ko05215,Prostate cancer;K07203,ko04072,Phospholipase D signaling pathway;K07203,ko04151,PI3K-Akt signaling pathway;K07203,ko01521,EGFR tyrosine kinase inhibitor resistance;K07203,ko05230,Central carbon metabolism in cancer;K07203,ko04920,Adipocytokine signaling pathway;K07203,ko04919,Thyroid hormone signalin…
THBS1	24.7365	6.72644	1.87814	7.18103	1.9e-15	6.43e-14	GO:0016525,biological_process,negative regulation of angiogenesis;GO:0007155,biological_process,cell adhesion;GO:0031012,cellular_component,extracellular matrix;GO:0050840,molecular_function,extracellular matrix binding;GO:0005509,molecular_function,calcium ion binding;GO:0030198,biological_process,extracellular matrix organization;GO:0006954,biological_process,inflammatory response;GO:0008201,mo…	K16857,ko04115,p53 signaling pathway;K16857,ko04015,Rap1 signaling pathway;K16857,ko05219,Bladder cancer;K16857,ko04510,Focal adhesion;K16857,ko05206,MicroRNAs in cancer;K16857,ko04512,ECM-receptor interaction;K16857,ko05205,Proteoglycans in cancer;K16857,ko04151,PI3K-Akt signaling pathway;K16857,ko05144,Malaria;K16857,ko04145,Phagosome;K16857,ko04350,TGF-beta signaling pathway
SRC	8.77442	2.58362	1.76182	5.23646	2.06e-09	1.77e-08	GO:0038083,biological_process,peptidyl-tyrosine autophosphorylation;GO:0004672,molecular_function,protein kinase activity;GO:0071801,biological_process,regulation of podosome assembly;GO:0007417,biological_process,central nervous system development;GO:0005524,molecular_function,ATP binding;GO:0050847,biological_process,progesterone receptor signaling pathway;GO:0016301,molecular_function,kinase a…	-
TGFB1	31.4609	9.51216	1.72459	6.07308	3.28e-11	4.18e-10	GO:0010469,biological_process,regulation of signaling receptor activity;GO:0003179,biological_process,heart valve morphogenesis;GO:0060389,biological_process,pathway-restricted SMAD protein phosphorylation;GO:0045216,biological_process,cell-cell junction organization;GO:0032967,biological_process,positive regulation of collagen biosynthetic process;GO:0033138,biological_process,positive regulatio…	K13375,ko05140,Leishmaniasis;K13375,ko04672,Intestinal immune network for IgA production;K13375,ko05161,Hepatitis B;K13375,ko05145,Toxoplasmosis;K13375,ko05321,Inflammatory bowel disease (IBD);K13375,ko04350,TGF-beta signaling pathway;K13375,ko05144,Malaria;K13375,ko05152,Tuberculosis;K13375,ko04068,FoxO signaling pathway;K13375,ko05146,Amoebiasis;K13375,ko04932,Non-alcoholic fatty liver disease …
AKT3	6.8168	2.1095	1.69048	5.43464	2.58e-09	2.16e-08	GO:0004672,molecular_function,protein kinase activity;GO:0016301,molecular_function,kinase activity;GO:0090050,biological_process,positive regulation of cell migration involved in sprouting angiogenesis;GO:0048873,biological_process,homeostasis of number of cells within a tissue;GO:2000773,biological_process,negative regulation of cellular senescence;GO:0045766,biological_process,positive regulat…	-
BMP4	3.69828	1.16947	1.65164	3.05377	0.00108952	0.00261073	GO:0021983,biological_process,pituitary gland development;GO:0000122,biological_process,negative regulation of transcription by RNA polymerase II;GO:0010159,biological_process,specification of animal organ position;GO:0048646,biological_process,anatomical structure formation involved in morphogenesis;GO:0051145,biological_process,smooth muscle cell differentiation;GO:0030900,biological_process,fo…	K04662,ko04060,Cytokine-cytokine receptor interaction;K04662,ko04350,TGF-beta signaling pathway;K04662,ko04341,Hedgehog signaling pathway - fly;K04662,ko04013,MAPK signaling pathway - fly;K04662,ko05217,Basal cell carcinoma;K04662,ko05200,Pathways in cancer;K04662,ko04390,Hippo signaling pathway;K04662,ko04550,Signaling pathways regulating pluripotency of stem cells
CAV2	22.594	7.191	1.651	6.7023	1.14e-11	1.61e-10	GO:0006906,biological_process,vesicle fusion;GO:0070836,biological_process,caveola assembly;GO:0019901,molecular_function,protein kinase binding;GO:0001937,biological_process,negative regulation of endothelial cell proliferation;GO:0032991,cellular_component,protein-containing complex;GO:0007005,biological_process,mitochondrion organization;GO:0043547,biological_process,positive regulation of GTP…	K12958,ko04510,Focal adhesion;K12958,ko04144,Endocytosis;K12958,ko05205,Proteoglycans in cancer;K12958,ko05100,Bacterial invasion of epithelial cells
NRP2	2.40946	0.77813	1.62753	4.52696	1.49e-06	6.8e-06	GO:0001755,biological_process,neural crest cell migration;GO:0097490,biological_process,sympathetic neuron projection extension;GO:0061551,biological_process,trigeminal ganglion development;GO:0005021,molecular_function,vascular endothelial growth factor-activated receptor activity;GO:0021828,biological_process,gonadotrophin-releasing hormone neuronal migration to the hypothalamus;GO:0007507,biol…	-
NRP1	0.618278	0.227505	1.43049	2.48638	0.0195301	0.0343571	GO:0060982,biological_process,coronary artery morphogenesis;GO:0005886,cellular_component,plasma membrane;GO:0005769,cellular_component,early endosome;GO:0042327,biological_process,positive regulation of phosphorylation;GO:0060385,biological_process,axonogenesis involved in innervation;GO:0021828,biological_process,gonadotrophin-releasing hormone neuronal migration to the hypothalamus;GO:0060978,…	K06724,ko05166,HTLV-I infection;K06724,ko04360,Axon guidance
CAV1	66.2003	26.1681	1.33875	7.56569	2.94e-09	2.43e-08	GO:0031397,biological_process,negative regulation of protein ubiquitination;GO:0033138,biological_process,positive regulation of peptidyl-serine phosphorylation;GO:2000286,biological_process,receptor internalization involved in canonical Wnt signaling pathway;GO:0000122,biological_process,negative regulation of transcription by RNA polymerase II;GO:0001960,biological_process,negative regulation o…	K06278,ko04510,Focal adhesion;K06278,ko05416,Viral myocarditis;K06278,ko04144,Endocytosis;K06278,ko05205,Proteoglycans in cancer;K06278,ko05100,Bacterial invasion of epithelial cells
TGFB2	1.79789	0.763339	1.22869	2.87426	0.0197076	0.0346163	GO:0045778,biological_process,positive regulation of ossification;GO:0008083,molecular_function,growth factor activity;GO:0031012,cellular_component,extracellular matrix;GO:0001942,biological_process,hair follicle development;GO:0060389,biological_process,pathway-restricted SMAD protein phosphorylation;GO:0045216,biological_process,cell-cell junction organization;GO:0007179,biological_process,tra…	-
