# Supplementary material for: Elevated Expression of The RNA-Binding Protein IGF2BP1 Enhances The Mrna Stability and Translation Efficiency of INHBA to Promote The Invasion and Migration of Esophageal Squamous Cancer Cells
Source: Research Square preprint supplement (doi:10.21203/rs.3.rs-885735/v2), 2022-03-28
Supplement: Supplementary file 3 [file 99ba59390fdf463431a99d84.xlsx]

## Sheet: Table S7
Supplementary Table S7. List of genes identified by RIP-seq.
Geneid	RIP_4h_rep1	Input_4h_rep1	logFC	logCPM	PValue	FDR	GeneID	uniprotAc	Refseq	pfam	interpro	eggNOG	GO(GO_term,class,description)	KEGG(KO,pathway,description)
CTD-2561B21.4	12.9786	0	7.54896	2.01948	4.11e-07	2.1e-06	ENSG00000262313	G3S879,Uncharacterized protein	-	PF00400,WD domain, G-beta repeat	IPR029347,Raptor, N-terminal CASPase-like domain;IPR017986,WD40-repeat-containing domain;IPR036322,WD40-repeat-containing domain superfamily;IPR004083,Regulatory associated protein of TOR;IPR015943,WD40/YVTN repeat-like-containing domain superfamily;IPR016024,Armadillo-type fold;IPR001680,WD40 repeat	-	GO:0031931,cellular_component,TORC1 complex;GO:0031929,biological_process,TOR signaling	-
RP11-706O15.1	2.0216	0	7.49481	1.97393	7.45e-07	3.61e-06	ENSG00000205664	H2PG84,Uncharacterized protein	-	-	-	-	-	-
FOXP2	0.323655	0	7.25526	1.77503	8.35e-06	3.23e-05	ENSG00000128573	G7P2I0,Uncharacterized protein	-	PF00250,orkhead domain;PF16159,OXP coiled-coil domain	IPR032354,FOXP, coiled-coil domain;IPR001766,Fork head domain;IPR036390,Winged helix DNA-binding domain superfamily;IPR030456,Fork head domain conserved site 2;IPR036388,Winged helix-like DNA-binding domain superfamily	-	GO:0003677,molecular_function,DNA binding;GO:0043565,molecular_function,sequence-specific DNA binding;GO:0003700,molecular_function,DNA binding transcription factor activity;GO:0006355,biological_process,regulation of transcription, DNA-templated;GO:0006351,biological_process,transcription, DNA-templated;GO:0005634,cellular_component,nucleus	-
TARID	0.634274	0	7.18859	1.72047	1.54e-05	5.62e-05	ENSG00000227954	A0A0D9RLJ9,Uncharacterized protein	-	-	-	-	-	-
TCAF2P1	2.05975	0	7.18859	1.72047	1.54e-05	5.62e-05	ENSG00000159860	A0A1B0GVM2,Uncharacterized protein	-	PF17291,N-terminal domain of M60-like peptidases;PF13402,Peptidase M60, enhancin and enhancin-like	IPR031161,Peptidase family M60 domain;IPR035423,M60-like domain, N-terminal	-	GO:0030054,cellular_component,cell junction;GO:0005886,cellular_component,plasma membrane	-
DLEU7	1.29902	0	7.1187	1.66366	1.54e-05	5.62e-05	ENSG00000186047	H2Q7L1,Deleted in lymphocytic leukemia, 7	XP_001157783.1,-	PF15760,Leukemia-associated protein 7	IPR031510,Leukemia-associated protein 7	ENOG410IF39,-;ENOG410Y73I,-	-	-
ZNF430	0.693821	0	7.1187	1.66366	1.54e-05	5.62e-05	ENSG00000118620	A8K360,cDNA FLJ77279, highly similar to Homo sapiens zinc finger protein 430	NP_079465.3,zinc finger protein 430 isoform 1;NP_001166142.1,zinc finger protein 430 isoform 2	PF00096,Zinc finger, C2H2 type;PF01352,KRAB box	IPR013087,Zinc finger C2H2-type;IPR001909,Krueppel-associated box;IPR036051,KRAB domain superfamily;IPR036236,Zinc finger C2H2 superfamily	KOG1721,FOG: Zn-finger;COG5048,FOG: Zn-finger	GO:0006355,biological_process,regulation of transcription, DNA-templated;GO:0003676,molecular_function,nucleic acid binding;GO:0046872,molecular_function,metal ion binding;GO:0005622,cellular_component,intracellular	-
AF196970.3	5.13427	0	7.1187	1.66366	1.54e-05	5.62e-05	ENSG00000232828	G3S5S8,Histone-lysine N-methyltransferase	-	PF00856,SET domain;PF00385,Chromo (CHRromatin Organisation MOdifier) domain;PF05033,Pre-SET motif	IPR023780,Chromo domain;IPR007728,Pre-SET domain;IPR016197,Chromo-like domain superfamily;IPR011381,Histone H3-K9 methyltransferase;IPR003616,Post-SET domain;IPR001214,SET domain;IPR023779,Chromo domain, conserved site;IPR000953,Chromo/chromo shadow domain	-	GO:0005694,cellular_component,chromosome;GO:0034968,biological_process,histone lysine methylation;GO:0016740,molecular_function,transferase activity;GO:0046872,molecular_function,metal ion binding;GO:0018024,molecular_function,histone-lysine N-methyltransferase activity;GO:0008168,molecular_function,methyltransferase activity;GO:0032259,biological_process,methylation;GO:0005634,cellular_component…	-
MAP2K6	0.697842	0	6.96785	1.54249	5.33e-05	0.000171704	ENSG00000108984	G3QTE4,Mitogen-activated protein kinase kinase 6	-	PF00069,Protein kinase domain	IPR011009,Protein kinase-like domain superfamily;IPR017441,Protein kinase, ATP binding site;IPR008271,Serine/threonine-protein kinase, active site;IPR000719,Protein kinase domain	-	GO:0004672,molecular_function,protein kinase activity;GO:0006468,biological_process,protein phosphorylation;GO:0000166,molecular_function,nucleotide binding;GO:0005524,molecular_function,ATP binding;GO:0004674,molecular_function,protein serine/threonine kinase activity	-
ARNTL2-AS1	5.02092	0	6.88606	1.47765	9.96e-05	0.000301228	-	-	-	-	-	-	-	-
CDKL5	0.236417	0	6.88606	1.47765	9.96e-05	0.000301228	ENSG00000008086	G3R5F5,Cyclin dependent kinase like 5	XP_004063919.1,cyclin-dependent kinase-like 5	PF00069,Protein kinase domain	IPR011009,Protein kinase-like domain superfamily;IPR017441,Protein kinase, ATP binding site;IPR008271,Serine/threonine-protein kinase, active site;IPR000719,Protein kinase domain	-	GO:0016301,molecular_function,kinase activity;GO:0005634,cellular_component,nucleus;GO:0046777,biological_process,protein autophosphorylation;GO:0004672,molecular_function,protein kinase activity;GO:0005829,cellular_component,cytosol;GO:0006468,biological_process,protein phosphorylation;GO:0005524,molecular_function,ATP binding;GO:0005654,cellular_component,nucleoplasm	-
RP11-96K19.2	1.61058	0	6.79936	1.40961	0.000187	0.000534433	ENSG00000232811	K6ZC55,Ligand dependent nuclear receptor interacting factor 1	-	PF15741,Ligand-dependent nuclear receptor-interacting factor 1	-	-	-	-
RP11-841O20.2	6.53935	0	6.79936	1.40961	0.000187	0.000534433	ENSG00000258757	I7GIJ8,Macaca fascicularis brain cDNA clone: QflA-20460, similar to human O-acyltransferase	-	-	-	-	GO:0016746,molecular_function,transferase activity, transferring acyl groups;GO:0016740,molecular_function,transferase activity	-
SDR42E1	0.318979	0	6.79936	1.40961	0.000187	0.000534433	ENSG00000184860	H2QBL1,Short chain dehydrogenase/reductase family 42E, member 1	XP_016785736.1,-;XP_523439.2,-;XP_001148161.1,short-chain dehydrogenase/reductase family 42E member 1	PF07993,Male sterility protein;PF01370,NAD dependent epimerase/dehydratase family;PF02719,Polysaccharide biosynthesis protein;PF01073,3-beta hydroxysteroid dehydrogenase/isomerase family;PF13460,NAD(P)H-binding;PF04321,RmlD substrate binding domain;PF16363,P-mannose 4,6 dehydratase	IPR036291,NAD(P)-binding domain superfamily;IPR002225,3-beta hydroxysteroid dehydrogenase/isomerase	KOG1430,C-3 sterol dehydrogenase/3-beta-hydroxysteroid dehydrogenase and related dehydrogenases;COG0451,Nucleoside-diphosphate-sugar epimerases	GO:0003854,molecular_function,3-beta-hydroxy-delta5-steroid dehydrogenase activity;GO:0016616,molecular_function,oxidoreductase activity, acting on the CH-OH group of donors, NAD or NADP as acceptor;GO:0016491,molecular_function,oxidoreductase activity;GO:0006694,biological_process,steroid biosynthetic process;GO:0016020,cellular_component,membrane;GO:0055114,biological_process,oxidation-reductio…	-
ZNF519	0.240664	0	6.79936	1.40961	0.000187	0.000534433	ENSG00000175322	H2QEB0,Uncharacterized protein	XP_523986.3,zinc finger protein 519	PF00096,Zinc finger, C2H2 type;PF01352,KRAB box	IPR013087,Zinc finger C2H2-type;IPR001909,Krueppel-associated box;IPR036051,KRAB domain superfamily;IPR036236,Zinc finger C2H2 superfamily	KOG1721,FOG: Zn-finger;COG5048,FOG: Zn-finger	GO:0006355,biological_process,regulation of transcription, DNA-templated;GO:0003676,molecular_function,nucleic acid binding;GO:0046872,molecular_function,metal ion binding;GO:0005622,cellular_component,intracellular	-
AP001469.9	1.66858	0	6.79936	1.40961	0.000187	0.000534433	ENSG00000239415	H2PFS9,Uncharacterized protein	-	-	-	-	-	-
SYNE3	0.196097	0	6.70712	1.33804	0.000352487	0.000943384	ENSG00000176438	K7DPQ3,Chromosome 14 open reading frame 49	XP_016782183.1,nesprin-3 isoform X3;XP_016782184.1,-	PF10541,Nuclear envelope localisation domain;PF00435,Spectrin repeat	IPR030267,Nesprin-3;IPR002017,Spectrin repeat;IPR018159,Spectrin/alpha-actinin;IPR012315,KASH domain	COG5069,Ca2+-binding actin-bundling protein fimbrin/plastin (EF-Hand superfamily);KOG0516,Dystonin, GAS (Growth-arrest-specific protein), and related proteins	GO:0008092,molecular_function,cytoskeletal protein binding;GO:0005640,cellular_component,nuclear outer membrane;GO:0007010,biological_process,cytoskeleton organization;GO:0090286,biological_process,cytoskeletal anchoring at nuclear membrane;GO:0034993,cellular_component,meiotic nuclear membrane microtubule tethering complex;GO:0016020,cellular_component,membrane;GO:0031965,cellular_component,nucl…	-
ALOX12-AS1	1.10721	0	6.70712	1.33804	0.000352487	0.000943384	ENSG00000215067	G3S2S6,Uncharacterized protein	-	-	-	-	-	-
MAGI2	0.112972	0	6.70712	1.33804	0.000352487	0.000943384	ENSG00000187391	H2QUU4,Uncharacterized protein	XP_009451709.1,membrane-associated guanylate kinase, WW and PDZ domain-containing protein 2 isoform X2	PF00397,WW domain;PF00625,uanylate kinase;PF00595,PDZ domain (Also known as DHR or GLGF);PF16663,Unstructured region on MAGI;PF16666,Unstructured region on MAGI	IPR001202,WW domain;IPR036034,PDZ superfamily;IPR001478,PDZ domain;IPR027417,P-loop containing nucleoside triphosphate hydrolase;IPR030036,Membrane-associated guanylate kinase, WW and PDZ domain-containing protein 2;IPR008144,Guanylate kinase-like domain;IPR020590,Guanylate kinase, conserved site;IPR008145,Guanylate kinase/L-type calcium channel beta subunit;IPR036020,WW domain superfamily	ENOG410ISXI,-;ENOG410XNXK,-	GO:0046332,molecular_function,SMAD binding;GO:2000809,biological_process,positive regulation of synaptic vesicle clustering;GO:0060395,biological_process,SMAD protein signal transduction;GO:0005923,cellular_component,bicellular tight junction;GO:0005737,cellular_component,cytoplasm;GO:0070699,molecular_function,type II activin receptor binding;GO:0005634,cellular_component,nucleus;GO:0004871,mole…	-
KIAA0196-AS1	6.06798	0	6.70712	1.33804	0.000352487	0.000943384	ENSG00000253167	A0A1S3FW18,WASH complex subunit strumpellin	XP_012880580.1,WASH complex subunit strumpellin	-	IPR019393,WASH complex, subunit strumpellin	-	GO:0071203,cellular_component,WASH complex	-
UTS2	1.85619	0	6.60857	1.26255	0.000667207	0.00167536	ENSG00000049247	Q5H8X8,Urotensin-2	-	-	-	-	-	-
SMAD9	0.580891	0	6.60857	1.26255	0.000667207	0.00167536	ENSG00000120693	F6YCR1,Mothers against decapentaplegic homolog	-	PF03165,MH1 domain;PF03166,MH2 domain	IPR003619,MAD homology 1, Dwarfin-type;IPR001132,SMAD domain, Dwarfin-type;IPR013790,Dwarfin;IPR017855,SMAD-like domain superfamily;IPR008984,SMAD/FHA domain superfamily;IPR036578,SMAD MH1 domain superfamily;IPR013019,MAD homology, MH1	ENOG410XQKU,-;KOG3701,TGFbeta receptor signaling protein SMAD and related proteins	GO:0071407,biological_process,cellular response to organic cyclic compound;GO:0003677,molecular_function,DNA binding;GO:0060395,biological_process,SMAD protein signal transduction;GO:0005667,cellular_component,transcription factor complex;GO:0005737,cellular_component,cytoplasm;GO:0007179,biological_process,transforming growth factor beta receptor signaling pathway;GO:0003700,molecular_function,D…	-
RP11-600F24.7	0.818223	0	6.60857	1.26255	0.000667207	0.00167536	ENSG00000260285	Q6ZNT3,cDNA FLJ27206 fis, clone SYN03441	-	-	-	-	-	-
RP1-59D14.1	3.12154	0	6.60857	1.26255	0.000667207	0.00167536	-	-	-	-	-	-	-	-
CTB-175E5.7	6.29629	0	6.60857	1.26255	0.000667207	0.00167536	-	-	-	-	-	-	-	-
KLHL7-AS1	1.29658	0	6.60857	1.26255	0.000667207	0.00167536	ENSG00000230658	H2RG68,Tigger transposable element derived 1	XP_016806199.1,tigger transposable element-derived protein 1	PF03184,superfamily endonuclease;PF03221,Tc5 transposase DNA-binding domain;PF04218,CENP-B N-terminal DNA-binding domain	IPR006600,HTH CenpB-type DNA-binding domain;IPR009057,Homeobox-like domain superfamily;IPR007889,DNA binding HTH domain, Psq-type;IPR004875,DDE superfamily endonuclease domain	ENOG4110CDI,-;KOG3105,DNA-binding centromere protein B (CENP-B)	GO:0003676,molecular_function,nucleic acid binding;GO:0003677,molecular_function,DNA binding	-
TBX20	1.77304	0	6.60857	1.26255	0.000667207	0.00167536	ENSG00000164532	H2QUF0,T-box 20	XP_522453.3,-	PF00907,T-box	IPR001699,Transcription factor, T-box;IPR036960,T-box superfamily;IPR008967,p53-like transcription factor, DNA-binding;IPR018186,Transcription factor, T-box, conserved site	KOG3586,TBX1 and related T-box transcription factors;ENOG410Y98J,-	GO:0003175,biological_process,tricuspid valve development;GO:0000122,biological_process,negative regulation of transcription by RNA polymerase II;GO:0006355,biological_process,regulation of transcription, DNA-templated;GO:0009953,biological_process,dorsal/ventral pattern formation;GO:0006351,biological_process,transcription, DNA-templated;GO:0003677,molecular_function,DNA binding;GO:0005634,cellu…	-
NR1I3	0.934034	0	6.50279	1.18268	0.00126829	0.00298663	ENSG00000143257	G1RVZ1,Nuclear receptor subfamily 1 group I member 3	XP_012366614.1,nuclear receptor subfamily 1 group I member 3 isoform X1	PF00105,Zinc finger, C4 type (two domains);PF00104,Ligand-binding domain of nuclear hormone receptor	IPR001628,Zinc finger, nuclear hormone receptor-type;IPR000536,Nuclear hormone receptor, ligand-binding domain;IPR035500,Nuclear hormone receptor-like domain superfamily;IPR001723,Nuclear hormone receptor;IPR013088,Zinc finger, NHR/GATA-type	KOG3575,FOG: Hormone receptors;ENOG410XRZC,-	GO:0003707,molecular_function,steroid hormone receptor activity;GO:0003677,molecular_function,DNA binding;GO:0043565,molecular_function,sequence-specific DNA binding;GO:0003700,molecular_function,DNA binding transcription factor activity;GO:0046872,molecular_function,metal ion binding;GO:0006355,biological_process,regulation of transcription, DNA-templated;GO:0006351,biological_process,transcript…	-
DNM3	0.272485	0	6.50279	1.18268	0.00126829	0.00298663	ENSG00000197959	A0A0D9RGW8,Dynamin 3	XP_007987691.1,-	PF00350,ynamin family;PF01031,ynamin central region;PF02212,ynamin GTPase effector domain;PF00169,PH domain	IPR019762,Dynamin, GTPase region, conserved site;IPR000375,Dynamin central domain;IPR020850,GTPase effector domain;IPR027417,P-loop containing nucleoside triphosphate hydrolase;IPR030381,Dynamin-type guanine nucleotide-binding (G) domain;IPR011993,PH-like domain superfamily;IPR022812,Dynamin superfamily;IPR003130,Dynamin GTPase effector;IPR001849,Pleckstrin homology domain;IPR001401,Dynamin, GTPa…	-	GO:0016185,biological_process,synaptic vesicle budding from presynaptic endocytic zone membrane;GO:0005525,molecular_function,GTP binding;GO:0005739,cellular_component,mitochondrion;GO:0003924,molecular_function,GTPase activity;GO:0045202,cellular_component,synapse;GO:0001917,cellular_component,photoreceptor inner segment;GO:0000166,molecular_function,nucleotide binding	-
AP003068.9	5.6746	0	6.50279	1.18268	0.00126829	0.00298663	ENSG00000254501	F1M4I4,VPS51 GARP complex subunit	-	PF08700,Vps51/Vps67	IPR014812,Vacuolar protein sorting-associated protein 51;IPR016159,Cullin repeat-like-containing domain superfamily	KOG2346,Uncharacterized conserved protein;ENOG410XPIF,-	GO:0005802,cellular_component,trans-Golgi network;GO:0005794,cellular_component,Golgi apparatus;GO:0000938,cellular_component,GARP complex;GO:0042147,biological_process,retrograde transport, endosome to Golgi;GO:0048193,biological_process,Golgi vesicle transport;GO:0016020,cellular_component,membrane;GO:0005515,molecular_function,protein binding;GO:1990745,cellular_component,EARP complex;GO:00069…	-
TMEM63C	0.485146	0	6.50279	1.18268	0.00126829	0.00298663	ENSG00000165548	A0A024R6B3,Transmembrane protein 63C, isoform CRA_a	NP_065164.2,calcium permeable stress-gated cation channel 1	PF14703,Cytosolic domain of 10TM putative phosphate transporter;PF02714,Calcium-dependent channel, 7TM region, putative phosphate;PF13967,Late exocytosis, associated with Golgi transport	IPR003864,Calcium-dependent channel, 7TM region, putative phosphate;IPR027815,10TM putative phosphate transporter, cytosolic domain;IPR032880,Calcium permeable stress-gated cation channel 1, N-terminal transmembrane domain	COG5594,Uncharacterized integral membrane protein;KOG1134,Uncharacterized conserved protein	GO:0016021,cellular_component,integral component of membrane;GO:0016020,cellular_component,membrane	-
RP11-66B24.8	5.47337	0	6.50279	1.18268	0.00126829	0.00298663	ENSG00000272639	Q3KRG0,Hypothetical LOC145757	-	-	-	-	-	-
OSBPL7	0.469717	0	6.50279	1.18268	0.00126829	0.00298663	ENSG00000006025	Q8WXP9,Oxysterol-binding protein	NP_665741.1,oxysterol-binding protein-related protein 7	PF15409,Pleckstrin homology domain;PF01237,Oxysterol-binding protein	IPR000648,Oxysterol-binding protein;IPR037239,Oxysterol-binding protein superfamily;IPR001849,Pleckstrin homology domain;IPR018494,Oxysterol-binding protein, conserved site;IPR011993,PH-like domain superfamily	KOG1737,Oxysterol-binding protein;ENOG410XP9E,-	GO:0006869,biological_process,lipid transport	-
HOXB-AS1	1.9801	0	6.50279	1.18268	0.00126829	0.00298663	-	-	-	-	-	-	-	-
CTB-152G17.6	1.16666	0	6.50279	1.18268	0.00126829	0.00298663	ENSG00000272918	H2PFS8,Uncharacterized protein	-	-	-	-	-	-
FAAH2	1.52897	0	6.50279	1.18268	0.00126829	0.00298663	ENSG00000165591	B2C6G4,Fatty acid amide hydrolase 2	NP_777572.2,fatty-acid amide hydrolase 2 isoform 1	PF01425,Amidase	IPR023631,Amidase signature domain;IPR036928,Amidase signature (AS) superfamily;IPR020556,Amidase, conserved site	KOG1212,Amidases;COG0154,Asp-tRNAAsn/Glu-tRNAGln amidotransferase A subunit and related amidases	GO:0016787,molecular_function,hydrolase activity	-
MAMLD1	0.518124	0	6.50279	1.18268	0.00126829	0.00298663	ENSG00000013619	G3RKK4,Mastermind like domain containing 1	-	-	IPR026131,Mastermind-like domain-containing protein 1	-	-	-
MKNK1-AS1	1.16545	0	6.38864	1.0979	0.00126829	0.00298663	ENSG00000269956	Q6ZP20,cDNA FLJ26702 fis, clone PCD01871	-	-	-	-	-	-
DKFZP434K028	0.986335	0	6.38864	1.0979	0.00126829	0.00298663	ENSG00000124915	Q9UFL8,HCG2017874	-	-	-	-	-	-
RP11-996F15.2	1.01298	0	6.38864	1.0979	0.00126829	0.00298663	ENSG00000257176	A0A096MWP3,Fatty acyl-CoA reductase	-	PF02719,Polysaccharide biosynthesis protein;PF01073,3-beta hydroxysteroid dehydrogenase/isomerase family;PF03015,Male sterility protein;PF07993,Male sterility protein;PF01370,NAD dependent epimerase/dehydratase family	-	-	-	-
RP11-454F8.3	5.19039	0	6.38864	1.0979	0.00126829	0.00298663	-	-	-	-	-	-	-	-
RP11-697E22.2	2.6023	0	6.38864	1.0979	0.00126829	0.00298663	ENSG00000277501	G1QRG6,DExD-box helicase 52	XP_003278445.1,probable ATP-dependent RNA helicase DDX52	PF00271,Helicase conserved C-terminal domain;PF00270,AD/DEAH box helicase	IPR011545,DEAD/DEAH box helicase domain;IPR014014,RNA helicase, DEAD-box type, Q motif;IPR001650,Helicase, C-terminal;IPR014001,Helicase superfamily 1/2, ATP-binding domain;IPR027417,P-loop containing nucleoside triphosphate hydrolase	KOG0344,ATP-dependent RNA helicase;ENOG410XQS8,-	GO:0003676,molecular_function,nucleic acid binding;GO:0005524,molecular_function,ATP binding	-
ZNF792	0.673009	0	6.38864	1.0979	0.00126829	0.00298663	ENSG00000180884	H2QG14,Uncharacterized protein	XP_524215.2,zinc finger protein 792	PF00096,Zinc finger, C2H2 type;PF01352,KRAB box	IPR013087,Zinc finger C2H2-type;IPR001909,Krueppel-associated box;IPR036051,KRAB domain superfamily;IPR036236,Zinc finger C2H2 superfamily	KOG1721,FOG: Zn-finger;COG5048,FOG: Zn-finger	GO:0006355,biological_process,regulation of transcription, DNA-templated;GO:0003676,molecular_function,nucleic acid binding;GO:0042802,molecular_function,identical protein binding;GO:0046872,molecular_function,metal ion binding;GO:0005622,cellular_component,intracellular	-
AC098614.2	1.16212	0	6.38864	1.0979	0.00126829	0.00298663	ENSG00000213846	Q6ZSR7,cDNA FLJ45255 fis, clone BRHIP2015153	-	-	-	-	-	-
USP46-AS1	2.71901	0	6.38864	1.0979	0.00126829	0.00298663	-	-	-	-	-	-	-	-
APBA1	0.250309	0	6.38864	1.0979	0.00126829	0.00298663	ENSG00000107282	H2QXC2,Uncharacterized protein	XP_009454976.1,-;XP_001138890.1,amyloid beta A4 precursor protein-binding family A member 1 isoform X1	PF00640,Phosphotyrosine interaction domain (PTB/PID);PF00595,PDZ domain (Also known as DHR or GLGF)	IPR030530,Amyloid beta A4 precursor protein-binding family A member 1;IPR011993,PH-like domain superfamily;IPR036034,PDZ superfamily;IPR006020,PTB/PI domain;IPR001478,PDZ domain	ENOG410XSBD,-;KOG3605,Beta amyloid precursor-binding protein	GO:0014051,biological_process,gamma-aminobutyric acid secretion;GO:0005794,cellular_component,Golgi apparatus;GO:0014047,biological_process,glutamate secretion;GO:0007268,biological_process,chemical synaptic transmission;GO:0016020,cellular_component,membrane;GO:0035264,biological_process,multicellular organism growth;GO:0010468,biological_process,regulation of gene expression;GO:0001701,biologic…	-
ROR2	0.489777	0	6.38864	1.0979	0.00126829	0.00298663	ENSG00000169071	A1L4F5,Receptor tyrosine kinase-like orphan receptor 2	-	PF01392,z domain;PF00051,Kringle domain;PF07714,Protein tyrosine kinase;PF07679,Immunoglobulin I-set domain	IPR000719,Protein kinase domain;IPR001245,Serine-threonine/tyrosine-protein kinase, catalytic domain;IPR000001,Kringle;IPR036790,Frizzled cysteine-rich domain superfamily;IPR038178,Kringle superfamily;IPR020067,Frizzled domain;IPR013806,Kringle-like fold;IPR036179,Immunoglobulin-like domain superfamily;IPR013783,Immunoglobulin-like fold;IPR008266,Tyrosine-protein kinase, active site;IPR007110,Imm…	KOG1026,Nerve growth factor receptor TRKA and related tyrosine kinases;ENOG410YGKQ,-	GO:0005515,molecular_function,protein binding;GO:0016301,molecular_function,kinase activity;GO:0007169,biological_process,transmembrane receptor protein tyrosine kinase signaling pathway;GO:0005524,molecular_function,ATP binding;GO:0004672,molecular_function,protein kinase activity;GO:0016020,cellular_component,membrane;GO:0006468,biological_process,protein phosphorylation;GO:0000166,molecular_fu…	-
GJB4	0.91974	0	6.26467	1.00757	0.00242129	0.00536972	ENSG00000189433	G3R0R2,Gap junction protein	XP_004025472.1,gap junction beta-4 protein	PF00029,Connexin	IPR017990,Connexin, conserved site;IPR002270,Gap junction beta-4 protein (Cx31.1);IPR013092,Connexin, N-terminal;IPR019570,Gap junction protein, cysteine-rich domain;IPR038359,Connexin, N-terminal domain superfamily;IPR000500,Connexin	-	GO:0030054,cellular_component,cell junction;GO:0005921,cellular_component,gap junction;GO:0005730,cellular_component,nucleolus;GO:0007608,biological_process,sensory perception of smell;GO:0005922,cellular_component,connexin complex;GO:0007154,biological_process,cell communication;GO:0005886,cellular_component,plasma membrane;GO:0016020,cellular_component,membrane;GO:0042048,biological_process,olf…	-
RP11-21L23.2	0.623106	0	6.26467	1.00757	0.00242129	0.00536972	ENSG00000261578	Q6ZSR7,cDNA FLJ45255 fis, clone BRHIP2015153	-	-	-	-	-	-
DNAH10	0.156224	0	6.26467	1.00757	0.00242129	0.00536972	ENSG00000197653	A0A1C7CYW8,Dynein heavy chain 10, axonemal	-	PF12774,Hydrolytic ATP binding site of dynein motor region D1;PF12777,Microtubule-binding stalk of dynein motor;PF07728,AAA domain (dynein-related subfamily);PF03028,ynein heavy chain and region D6 of dynein motor;PF12780,P-loop containing dynein motor region D4;PF08393,ynein heavy chain, N-terminal region 2;PF08385,ynein heavy chain, N-terminal region 1;PF12781,ATP-binding dynein motor region D5…	IPR035699,Dynein heavy chain, hydrolytic ATP-binding dynein motor region D1;IPR024743,Dynein heavy chain, coiled coil stalk;IPR026983,Dynein heavy chain;IPR027417,P-loop containing nucleoside triphosphate hydrolase;IPR004273,Dynein heavy chain domain;IPR013602,Dynein heavy chain, domain-2;IPR035706,Dynein heavy chain, ATP-binding dynein motor region D5;IPR011704,ATPase, dynein-related, AAA domain…	-	GO:0007018,biological_process,microtubule-based movement;GO:0030286,cellular_component,dynein complex;GO:0016887,molecular_function,ATPase activity;GO:0003777,molecular_function,microtubule motor activity;GO:0005524,molecular_function,ATP binding	-
RP11-57A19.2	1.05283	0	6.26467	1.00757	0.00242129	0.00536972	ENSG00000246465	G7PXF9,Uncharacterized protein	-	-	-	-	-	-
ITFG1-AS1	4.17262	0	6.26467	1.00757	0.00242129	0.00536972	ENSG00000260281	A0A1U7THJ7,T-cell immunomodulatory protein	XP_008053211.1,-	-	IPR024881,T-cell immunomodulatory protein	-	GO:0016021,cellular_component,integral component of membrane;GO:0016020,cellular_component,membrane	-
CCL22	0.891793	0	6.26467	1.00757	0.00242129	0.00536972	ENSG00000102962	G3QZ89,C-C motif chemokine	-	PF00048,Small cytokines (intecrine/chemokine), interleukin-8 like	-	-	-	-
CTRL	0.962085	0	6.26467	1.00757	0.00242129	0.00536972	ENSG00000141086	Q8IUW0,CTRL protein	-	PF00089,Trypsin	IPR001254,Serine proteases, trypsin domain;IPR018114,Serine proteases, trypsin family, histidine active site;IPR001314,Peptidase S1A, chymotrypsin family;IPR009003,Peptidase S1, PA clan;IPR033116,Serine proteases, trypsin family, serine active site	KOG3627,Trypsin;COG5640,Secreted trypsin-like serine protease	GO:0008236,molecular_function,serine-type peptidase activity;GO:0006508,biological_process,proteolysis;GO:0016787,molecular_function,hydrolase activity;GO:0004252,molecular_function,serine-type endopeptidase activity;GO:0008233,molecular_function,peptidase activity	-
ALOX12	0.998494	0	6.26467	1.00757	0.00242129	0.00536972	ENSG00000108839	G3R2S7,Arachidonate 12-lipoxygenase, 12S type	XP_004058489.1,arachidonate 12-lipoxygenase, 12S-type	PF00305,Lipoxygenase;PF01477,PLAT/LH2 domain	IPR020834,Lipoxygenase, conserved site;IPR036392,PLAT/LH2 domain superfamily;IPR001024,PLAT/LH2 domain;IPR036226,Lipoxigenase, C-terminal domain superfamily;IPR020833,Lipoxygenase, iron binding site;IPR013819,Lipoxygenase, C-terminal;IPR001885,Lipoxygenase, mammalian;IPR000907,Lipoxygenase	-	GO:0051213,molecular_function,dioxygenase activity;GO:0046872,molecular_function,metal ion binding;GO:0016491,molecular_function,oxidoreductase activity;GO:0005506,molecular_function,iron ion binding;GO:0055114,biological_process,oxidation-reduction process;GO:0016702,molecular_function,oxidoreductase activity, acting on single donors with incorporation of molecular oxygen, incorporation of two a…	-
AF127577.10	4.6478	0	6.26467	1.00757	0.00242129	0.00536972	-	-	-	-	-	-	-	-
RP11-308B16.2	7.02167	0	6.26467	1.00757	0.00242129	0.00536972	ENSG00000248783	G7PC85,Uncharacterized protein	-	-	-	-	-	-
BNC2	0.170467	0	6.26467	1.00757	0.00242129	0.00536972	ENSG00000173068	H2R6S5,Basonuclin 2	XP_520498.2,zinc finger protein basonuclin-2 isoform X4	PF00096,Zinc finger, C2H2 type;PF12874,Zinc-finger of C2H2 type	IPR013087,Zinc finger C2H2-type	ENOG410IE3V,-;ENOG410YN2D,-	GO:0060485,biological_process,mesenchyme development;GO:0003677,molecular_function,DNA binding;GO:0060021,biological_process,roof of mouth development;GO:0003416,biological_process,endochondral bone growth;GO:0003676,molecular_function,nucleic acid binding;GO:0005654,cellular_component,nucleoplasm;GO:0005634,cellular_component,nucleus;GO:0043586,biological_process,tongue development	-
RP11-345P4.9	1.16516	0	6.12904	0.910906	0.00464265	0.00958981	ENSG00000272106	Q6ZTL7,cDNA FLJ44537 fis, clone UTERU3005049	-	-	-	-	-	-
RP11-867G23.8	1.54195	0	6.12904	0.910906	0.00464265	0.00958981	ENSG00000255468	F7I026,Uncharacterized protein	-	-	-	-	-	-
NAV3	0.195682	0	6.12904	0.910906	0.00464265	0.00958981	ENSG00000067798	G1QYL8,Neuron navigator 3	XP_003259631.1,neuron navigator 3 isoform X1	PF00004,ATPase family associated with various cellular activities (AAA);PF00307,Calponin homology (CH) domain	IPR003959,ATPase, AAA-type, core;IPR001715,Calponin homology domain;IPR003593,AAA+ ATPase domain;IPR036872,CH domain superfamily;IPR027417,P-loop containing nucleoside triphosphate hydrolase	ENOG410IGVF,-;ENOG410XRG8,-	GO:1905929,biological_process,positive regulation of invadopodium disassembly;GO:1990752,cellular_component,microtubule end;GO:0007026,biological_process,negative regulation of microtubule depolymerization;GO:0032703,biological_process,negative regulation of interleukin-2 production;GO:0031116,biological_process,positive regulation of microtubule polymerization;GO:0008017,molecular_function,micro…	-
RP11-380N8.7	5.11768	0	6.12904	0.910906	0.00464265	0.00958981	-	-	-	-	-	-	-	-
CCDC169	0.268711	0	6.12904	0.910906	0.00464265	0.00958981	ENSG00000242715	F6RGK2,Uncharacterized protein	-	PF15372,omain of unknown function (DUF4600)	IPR028022,Protein of unknown function DUF4600	ENOG4111UKE,-;ENOG410IWC3,-	-	-
RP11-461A8.1	7.21763	0	6.12904	0.910906	0.00464265	0.00958981	ENSG00000261938	G3RKC9,SLX4 structure-specific endonuclease subunit	XP_018868364.1,structure-specific endonuclease subunit SLX4 isoform X1	PF09494,Slx4 endonuclease;PF00651,BTB/POZ domain	IPR000210,BTB/POZ domain;IPR011333,SKP1/BTB/POZ domain superfamily;IPR018574,Structure-specific endonuclease subunit Slx4	-	GO:0006281,biological_process,DNA repair;GO:0006260,biological_process,DNA replication;GO:0033557,cellular_component,Slx1-Slx4 complex;GO:0005634,cellular_component,nucleus;GO:0017108,molecular_function,5'-flap endonuclease activity	-
RP11-77K12.5	2.86097	0	6.12904	0.910906	0.00464265	0.00958981	ENSG00000262583	H2RAT2,Uncharacterized protein	-	PF10149,Transmembrane protein 231	IPR019306,Transmembrane protein 231	KOG4838,Uncharacterized conserved protein;ENOG410XQ0K,-	GO:0060170,cellular_component,ciliary membrane;GO:0032880,biological_process,regulation of protein localization;GO:0035869,cellular_component,ciliary transition zone;GO:0043010,biological_process,camera-type eye development;GO:0007224,biological_process,smoothened signaling pathway;GO:0060563,biological_process,neuroepithelial cell differentiation;GO:0001701,biological_process,in utero embryonic …	-
SGSM1	0.275892	0	6.12904	0.910906	0.00464265	0.00958981	ENSG00000167037	H2RCJ4,Uncharacterized protein	XP_016802775.1,-;XP_001171406.1,small G protein signaling modulator 1 isoform X1	PF00566,Rab-GTPase-TBC domain;PF02759,RUN domain	IPR000195,Rab-GTPase-TBC domain;IPR035969,Rab-GTPase-TBC domain superfamily;IPR037213,RUN domain superfamily;IPR037745,Small G protein signaling modulator 1/2, PH domain;IPR004012,RUN domain	KOG1648,Uncharacterized conserved protein, contains RUN, BRK and TBC domains;COG5210,GTPase-activating protein	GO:0012505,cellular_component,endomembrane system;GO:0017137,molecular_function,Rab GTPase binding;GO:0005096,molecular_function,GTPase activator activity;GO:0090630,biological_process,activation of GTPase activity;GO:0031338,biological_process,regulation of vesicle fusion;GO:0005622,cellular_component,intracellular;GO:0006886,biological_process,intracellular protein transport	-
MAP6D1	0.98613	0	6.12904	0.910906	0.00464265	0.00958981	ENSG00000180834	K7ANA0,MAP6 domain containing 1	-	-	-	-	-	-
CLIC5	0.263933	0	6.12904	0.910906	0.00464265	0.00958981	ENSG00000112782	G3RBM4,Chloride intracellular channel protein	XP_004044177.1,chloride intracellular channel protein 5 isoform X1	PF13410,lutathione S-transferase, C-terminal domain;PF13417,lutathione S-transferase, N-terminal domain	IPR002946,Intracellular chloride channel;IPR036249,Thioredoxin-like superfamily;IPR036282,Glutathione S-transferase, C-terminal domain superfamily;IPR010987,Glutathione S-transferase, C-terminal-like;IPR004045,Glutathione S-transferase, N-terminal;IPR030264,Chloride intracellular channel protein 5	-	GO:1902476,biological_process,chloride transmembrane transport;GO:0006821,biological_process,chloride transport;GO:0034707,cellular_component,chloride channel complex;GO:0005737,cellular_component,cytoplasm;GO:0015629,cellular_component,actin cytoskeleton;GO:0007605,biological_process,sensory perception of sound;GO:0005254,molecular_function,chloride channel activity;GO:0006811,biological_process…	-
PDE7B	0.399361	0	6.12904	0.910906	0.00464265	0.00958981	ENSG00000171408	Q4LE81,Phosphodiesterase	-	PF00233,3'5'-cyclic nucleotide phosphodiesterase	IPR003607,HD/PDEase domain;IPR023088,3'5'-cyclic nucleotide phosphodiesterase;IPR023174,3'5'-cyclic nucleotide phosphodiesterase, conserved site;IPR002073,3'5'-cyclic nucleotide phosphodiesterase, catalytic domain;IPR036971,3'5'-cyclic nucleotide phosphodiesterase, catalytic domain superfamily	ENOG410XRI7,-;KOG3689,Cyclic nucleotide phosphodiesterase	GO:0007165,biological_process,signal transduction;GO:0008081,molecular_function,phosphoric diester hydrolase activity;GO:0004114,molecular_function,3',5'-cyclic-nucleotide phosphodiesterase activity;GO:0016787,molecular_function,hydrolase activity;GO:0046872,molecular_function,metal ion binding	-
RP11-479O9.4	1.2103	0	6.12904	0.910906	0.00464265	0.00958981	ENSG00000272693	Q6NXN2,Hypothetical LOC441242	-	-	-	-	-	-
LMLN-AS1	42.9356	0.604545	6.0082	3.69016	6.03e-17	2.78e-15	ENSG00000232832	H2QP23,Leishmanolysin like peptidase	-	PF01457,Leishmanolysin	IPR001577,Peptidase M8, leishmanolysin	ENOG410XSAG,-;KOG2556,Leishmanolysin-like peptidase (Peptidase M8 family)	GO:0006508,biological_process,proteolysis;GO:0007155,biological_process,cell adhesion;GO:0004222,molecular_function,metalloendopeptidase activity;GO:0016021,cellular_component,integral component of membrane;GO:0016020,cellular_component,membrane	-
MCOLN3	0.322685	0	5.97933	0.806972	0.00894141	0.017239	ENSG00000055732	G3QWU1,Mucolipin 3	XP_018871751.1,mucolipin-3	PF08016,Polycystin cation channel	IPR013122,Polycystin cation channel, PKD1/PKD2	-	GO:0005737,cellular_component,cytoplasm;GO:0005886,cellular_component,plasma membrane;GO:0016021,cellular_component,integral component of membrane;GO:0016020,cellular_component,membrane;GO:0007626,biological_process,locomotory behavior;GO:0042491,biological_process,inner ear auditory receptor cell differentiation	-
RP11-755F10.1	5.38323	0	5.97933	0.806972	0.00894141	0.017239	-	-	-	-	-	-	-	-
GDPD5	0.216595	0	5.97933	0.806972	0.00894141	0.017239	ENSG00000158555	A0A024R5K7,Glycerophosphodiester phosphodiesterase domain containing 5, isoform CRA_a	-	PF03009,lycerophosphoryl diester phosphodiesterase family	IPR030395,Glycerophosphodiester phosphodiesterase domain;IPR004129,Glycerophosphoryl diester phosphodiesterase;IPR017946,PLC-like phosphodiesterase, TIM beta/alpha-barrel domain superfamily	KOG2258,Glycerophosphoryl diester phosphodiesterase;COG0584,Glycerophosphoryl diester phosphodiesterase	GO:0008889,molecular_function,glycerophosphodiester phosphodiesterase activity;GO:0006629,biological_process,lipid metabolic process;GO:0008081,molecular_function,phosphoric diester hydrolase activity;GO:0016021,cellular_component,integral component of membrane;GO:0016020,cellular_component,membrane	-
RP11-110I1.6	3.20411	0	5.97933	0.806972	0.00894141	0.017239	ENSG00000255114	A0A0P6CVN8,Uncharacterized protein	-	-	-	-	-	-
RP11-299G20.2	0.825151	0	5.97933	0.806972	0.00894141	0.017239	ENSG00000259172	F7ILB5,Uncharacterized protein	-	-	-	ENOG410YZ90,-;ENOG410JFAY,-	-	-
MTCO1P40	3.41943	0	5.97933	0.806972	0.00894141	0.017239	ENSG00000262902	B2XI93,Cytochrome c oxidase subunit 1	-	PF00115,Cytochrome C and Quinol oxidase polypeptide I	IPR036927,Cytochrome c oxidase-like, subunit I superfamily;IPR023615,Cytochrome c oxidase, subunit I, copper-binding site;IPR000883,Cytochrome c oxidase subunit I;IPR033944,Cytochrome c oxidase subunit I domain;IPR023616,Cytochrome c oxidase-like, subunit I domain	KOG4769,Cytochrome c oxidase, subunit I;COG0843,Heme/copper-type cytochrome/quinol oxidases, subunit 1	GO:0022900,biological_process,electron transport chain;GO:0006119,biological_process,oxidative phosphorylation;GO:1902600,biological_process,proton transmembrane transport;GO:0005506,molecular_function,iron ion binding;GO:0016020,cellular_component,membrane;GO:0004129,molecular_function,cytochrome-c oxidase activity;GO:0046872,molecular_function,metal ion binding;GO:0009055,molecular_function,ele…	-
CTD-2561B21.5	0.507997	0	5.97933	0.806972	0.00894141	0.017239	ENSG00000261924	Q6ZRW6,cDNA FLJ46026 fis, clone SPLEN2024571	-	-	-	-	-	-
PSG9	0.423364	0	5.97933	0.806972	0.00894141	0.017239	ENSG00000183668	Q6LEU7,PSG9 protein	-	PF07686,Immunoglobulin V-set domain;PF13895,Immunoglobulin domain	IPR007110,Immunoglobulin-like domain;IPR036179,Immunoglobulin-like domain superfamily;IPR013783,Immunoglobulin-like fold;IPR003599,Immunoglobulin subtype;IPR003598,Immunoglobulin subtype 2;IPR013106,Immunoglobulin V-set domain	ENOG410JG1N,-;ENOG410YTW2,-	-	-
CTC-444N24.7	1.54084	0	5.97933	0.806972	0.00894141	0.017239	-	-	-	-	-	-	-	-
FBXO36	0.541734	0	5.97933	0.806972	0.00894141	0.017239	ENSG00000153832	H2R622,F-box protein 36	-	PF00646,-box domain	IPR036047,F-box-like domain superfamily;IPR001810,F-box domain	ENOG4111P01,-;ENOG410IPEE,-	-	-
TUG1_1	14.7389	0	5.97933	0.806972	0.00894141	0.017239	-	-	-	-	-	-	-	-
SLC15A2	0.344145	0	5.97933	0.806972	0.00894141	0.017239	ENSG00000163406	Q86UE9,Solute carrier family 15	-	PF00854,POT family	IPR029028,Alpha/beta knot methyltransferases;IPR004768,Oligopeptide transporter;IPR020846,Major facilitator superfamily domain;IPR018456,PTR2 family proton/oligopeptide symporter, conserved site;IPR036259,MFS transporter superfamily;IPR000109,Proton-dependent oligopeptide transporter family	KOG1237,H+/oligopeptide symporter;COG3104,Dipeptide/tripeptide permease	GO:0022857,molecular_function,transmembrane transporter activity;GO:0055085,biological_process,transmembrane transport;GO:0006857,biological_process,oligopeptide transport;GO:0035672,biological_process,oligopeptide transmembrane transport;GO:0016020,cellular_component,membrane;GO:0035673,molecular_function,oligopeptide transmembrane transporter activity;GO:0005215,molecular_function,transporter a…	-
RP11-428J1.5	1.43529	0	5.97933	0.806972	0.00894141	0.017239	-	-	-	-	-	-	-	-
MIR6835	33.3928	0	5.97933	0.806972	0.00894141	0.017239	-	-	-	-	-	-	-	-
EEPD1	0.44092	0	5.97933	0.806972	0.00894141	0.017239	ENSG00000122547	G3QR97,Endonuclease/exonuclease/phosphatase family domain containing 1	XP_004045357.1,-	PF12836,Helix-hairpin-helix motif	IPR003583,Helix-hairpin-helix DNA-binding motif, class 1;IPR036691,Endonuclease/exonuclease/phosphatase superfamily;IPR010994,RuvA domain 2-like;IPR004509,Competence protein ComEA, helix-hairpin-helix domain	-	GO:0006281,biological_process,DNA repair;GO:0003677,molecular_function,DNA binding	-
ST7-AS2	0.745688	0	5.97933	0.806972	0.00894141	0.017239	-	-	-	-	-	-	-	-
GIMAP2	1.01914	0	5.97933	0.806972	0.00894141	0.017239	ENSG00000106560	A0A090N8H4,GTPase, IMAP family member 2, isoform CRA_c	NP_056475.1,GTPase IMAP family member 2	PF04548,AIG1 family	IPR006703,AIG1-type guanine nucleotide-binding (G) domain;IPR027417,P-loop containing nucleoside triphosphate hydrolase	ENOG410Y0H9,-;ENOG410J90P,-	GO:0005525,molecular_function,GTP binding;GO:0016021,cellular_component,integral component of membrane;GO:0016020,cellular_component,membrane	-
RP4-758J18.7	3.49849	0	5.81226	0.694588	0.0172979	0.0307366	-	-	-	-	-	-	-	-
TCEA3	0.54045	0	5.81226	0.694588	0.0172979	0.0307366	ENSG00000204219	H2R320,Transcription elongation factor A	XP_513192.4,-	PF08711,TFIIS helical bundle-like domain;PF07500,Transcription factor S-II (TFIIS), central domain;PF01096,Transcription factor S-II (TFIIS)	IPR001222,Zinc finger, TFIIS-type;IPR035441,TFIIS/LEDGF domain superfamily;IPR017923,Transcription factor IIS, N-terminal;IPR036575,Transcription elongation factor S-II, central domain superfamily;IPR006289,Transcription elongation factor, TFIIS;IPR035100,Transcription elongation factor, IIS-type;IPR003618,Transcription elongation factor S-II, central domain;IPR003617,Transcription elongation fac…	COG1594,DNA-directed RNA polymerase, subunit M/Transcription elongation factor TFIIS;KOG1105,Transcription elongation factor TFIIS/Cofactor of enhancer-binding protein Sp1	GO:0003746,molecular_function,translation elongation factor activity;GO:0003676,molecular_function,nucleic acid binding;GO:0046872,molecular_function,metal ion binding;GO:0006355,biological_process,regulation of transcription, DNA-templated;GO:0006414,biological_process,translational elongation;GO:0005634,cellular_component,nucleus;GO:0008270,molecular_function,zinc ion binding;GO:0006351,biologi…	-
AC245100.1	1.79554	0	5.81226	0.694588	0.0172979	0.0307366	ENSG00000280649	B9EK34,Uncharacterized protein	-	-	-	ENOG4111A5N,-;ENOG410JBYT,-	-	-
TNNT2	0.2617	0	5.81226	0.694588	0.0172979	0.0307366	ENSG00000118194	F7HC43,Troponin T2, cardiac type	-	PF00992,Troponin	IPR038077,Troponin domain superfamily;IPR001978,Troponin;IPR027707,Troponin T	KOG3634,Troponin;ENOG410XS6A,-	GO:0031013,molecular_function,troponin I binding;GO:0006937,biological_process,regulation of muscle contraction;GO:0005523,molecular_function,tropomyosin binding;GO:0097512,cellular_component,cardiac myofibril;GO:0032780,biological_process,negative regulation of ATPase activity;GO:0005865,cellular_component,striated muscle thin filament;GO:0051592,biological_process,response to calcium ion;GO:199…	-
LRRC37A6P	0.337721	0	5.81226	0.694588	0.0172979	0.0307366	ENSG00000230445	H2RHT2,Uncharacterized protein	-	PF14914,LRRC37A/B like protein 1 C-terminal domain;PF13855,Leucine rich repeat;PF15779,Leucine-rich repeat-containing protein 37 family	IPR001611,Leucine-rich repeat;IPR032754,Leucine-rich repeat-containing protein 37, N-terminal;IPR032675,Leucine-rich repeat domain superfamily;IPR029423,LRRC37A/B like protein 1, C-terminal;IPR003591,Leucine-rich repeat, typical subtype;IPR015753,Leucine-rich repeat-containing protein 37	ENOG410YV94,-;ENOG410IJNR,-	GO:0016021,cellular_component,integral component of membrane;GO:0016020,cellular_component,membrane	-
LINC00858	0.659841	0	5.81226	0.694588	0.0172979	0.0307366	ENSG00000229404	A0A146U7E7,HCG1984907	-	-	-	-	-	-
BMS1P3	2.03828	0	5.81226	0.694588	0.0172979	0.0307366	ENSG00000240089	F1RG23,BMS1, ribosome biogenesis factor	-	PF04950,40S ribosome biogenesis protein Tsr1 and BMS1 C-terminal	IPR037875,Ribosome biogenesis protein Bms1, N-terminal;IPR007034,Ribosome biogenesis protein BMS1/TSR1, C-terminal;IPR030387,Bms1/Tsr1-type G domain;IPR012948,AARP2CN;IPR027417,P-loop containing nucleoside triphosphate hydrolase	KOG1951,GTP-binding protein AARP2 involved in 40S ribosome biogenesis;COG5192,GTP-binding protein required for 40S ribosome biogenesis	GO:0005525,molecular_function,GTP binding;GO:0042254,biological_process,ribosome biogenesis;GO:0005634,cellular_component,nucleus	-
ATE1-AS1	1.62089	0	5.81226	0.694588	0.0172979	0.0307366	ENSG00000226864	H0XP96,Uncharacterized protein	-	-	-	ENOG410JAFR,-;ENOG4111CIY,-	-	-
MIR7106	29.2259	0	5.81226	0.694588	0.0172979	0.0307366	-	-	-	-	-	-	-	-
COL4A2-AS2	1.24815	0	5.81226	0.694588	0.0172979	0.0307366	ENSG00000224821	Q6ZP31,cDNA FLJ26619 fis, clone MPB09660	NP_001253973.1,uncharacterized protein LOC100129836	-	-	-	-	-
RP11-1103G16.1	1.13822	0	5.81226	0.694588	0.0172979	0.0307366	-	-	-	-	-	-	-	-
RP11-48G14.2	0.770662	0	5.81226	0.694588	0.0172979	0.0307366	ENSG00000259941	H0YLZ3,Testis-expressed protein 9	-	-	-	ENOG41102ZI,-;ENOG410IGT0,-	-	-
RBPMS2	0.90418	0	5.81226	0.694588	0.0172979	0.0307366	ENSG00000166831	H2Q9L2,RNA binding protein with multiple splicing 2	XP_001174270.1,RNA-binding protein with multiple splicing 2 isoform X1	PF00076,RNA recognition motif. (a.k.a. RRM, RBD, or RNP domain)	IPR034787,RBPMS2, RNA recognition motif;IPR000504,RNA recognition motif domain;IPR035979,RNA-binding domain superfamily;IPR012677,Nucleotide-binding alpha-beta plait domain superfamily	ENOG410XSBT,-;KOG1457,RNA binding protein (contains RRM repeats)	GO:0005737,cellular_component,cytoplasm;GO:0003676,molecular_function,nucleic acid binding;GO:0051151,biological_process,negative regulation of smooth muscle cell differentiation;GO:0003723,molecular_function,RNA binding;GO:0042803,molecular_function,protein homodimerization activity;GO:0003729,molecular_function,mRNA binding	-
CTD-3065B20.3	2.354	0	5.81226	0.694588	0.0172979	0.0307366	-	-	-	-	-	-	-	-
RP11-419C5.2	1.09935	0	5.81226	0.694588	0.0172979	0.0307366	ENSG00000226232	B7ZM90,Uncharacterized protein	-	PF06409,Nuclear pore complex interacting protein (NPIP)	IPR009443,Nuclear pore complex interacting protein	-	GO:0016021,cellular_component,integral component of membrane;GO:0016020,cellular_component,membrane	-
RP11-505K9.4	0.621827	0	5.81226	0.694588	0.0172979	0.0307366	ENSG00000260300	A0A087X1B8,Uncharacterized protein	-	PF05292,Malonyl-CoA decarboxylase C-terminal domain	IPR007956,Malonyl-CoA decarboxylase, C-terminal	KOG3018,Malonyl-CoA decarboxylase;COG1593,TRAP-type C4-dicarboxylate transport system, large permease component	GO:0006633,biological_process,fatty acid biosynthetic process;GO:0050080,molecular_function,malonyl-CoA decarboxylase activity	-
RP11-314A20.5	3.95767	0	5.81226	0.694588	0.0172979	0.0307366	ENSG00000261898	I3L2Q0,Mediator of RNA polymerase II transcription subunit 11	-	PF10280,Mediator complex protein	IPR019404,Mediator complex, subunit Med11	ENOG4111SCB,-;KOG4057,Uncharacterized conserved protein	GO:0006357,biological_process,regulation of transcription by RNA polymerase II;GO:0006355,biological_process,regulation of transcription, DNA-templated;GO:0006351,biological_process,transcription, DNA-templated;GO:0016592,cellular_component,mediator complex;GO:0001104,molecular_function,RNA polymerase II transcription cofactor activity;GO:0005634,cellular_component,nucleus	-
MFAP4	0.882751	0	5.81226	0.694588	0.0172979	0.0307366	ENSG00000166482	K7ES70,Microfibril-associated glycoprotein 4	-	PF00147,ibrinogen beta and gamma chains, C-terminal globular domain	IPR002181,Fibrinogen, alpha/beta/gamma chain, C-terminal globular domain;IPR036056,Fibrinogen-like, C-terminal	KOG2579,Ficolin and related extracellular proteins;ENOG410ZYS4,-	-	-
ZNF750	0.51163	0	5.81226	0.694588	0.0172979	0.0307366	ENSG00000141579	G3QHX3,Zinc finger protein 750	XP_004040794.1,zinc finger protein 750	PF15269,Zinc-finger	-	-	GO:0006366,biological_process,transcription by RNA polymerase II;GO:0008544,biological_process,epidermis development;GO:0045944,biological_process,positive regulation of transcription by RNA polymerase II;GO:1990841,molecular_function,promoter-specific chromatin binding;GO:0001077,molecular_function,transcriptional activator activity, RNA polymerase II proximal promoter sequence-specific DNA bind…	-
CBX3P2	1.32938	0	5.81226	0.694588	0.0172979	0.0307366	ENSG00000266405	G1KN19,Chromobox 3	XP_003222084.1,chromobox protein homolog 3 isoform X2	PF00385,Chromo (CHRromatin Organisation MOdifier) domain;PF01393,Chromo shadow domain	IPR023780,Chromo domain;IPR016197,Chromo-like domain superfamily;IPR008251,Chromo shadow domain;IPR023779,Chromo domain, conserved site;IPR017984,Chromo domain subgroup;IPR000953,Chromo/chromo shadow domain;IPR038033,Chromobox protein homolog 3	ENOG4111JKD,-;KOG1911,Heterochromatin-associated protein HP1 and related CHROMO domain proteins	GO:0019899,molecular_function,enzyme binding;GO:0000785,cellular_component,chromatin;GO:0005719,cellular_component,nuclear euchromatin;GO:0005819,cellular_component,spindle;GO:0045892,biological_process,negative regulation of transcription, DNA-templated;GO:0019904,molecular_function,protein domain specific binding;GO:1990226,molecular_function,histone methyltransferase binding;GO:0000775,cellula…	-
WDR88	1.03187	0	5.81226	0.694588	0.0172979	0.0307366	ENSG00000166359	G2HGP2,PQQ repeat and WD repeat domain-containing protein	NP_001233357.1,WD repeat-containing protein 88	PF00400,WD domain, G-beta repeat;PF01011,PQQ enzyme repeat	IPR011047,Quinoprotein alcohol dehydrogenase-like superfamily;IPR019775,WD40 repeat, conserved site;IPR017986,WD40-repeat-containing domain;IPR015943,WD40/YVTN repeat-like-containing domain superfamily;IPR018391,Pyrrolo-quinoline quinone beta-propeller repeat;IPR020472,G-protein beta WD-40 repeat;IPR001680,WD40 repeat;IPR002372,Pyrrolo-quinoline quinone repeat	ENOG410XP3K,-;KOG0266,WD40 repeat-containing protein	-	-
CEACAM6	0.622438	0	5.81226	0.694588	0.0172979	0.0307366	ENSG00000086548	H2QGH0,Carcinoembryonic antigen related cell adhesion molecule 6	-	PF13927,Immunoglobulin domain;PF07686,Immunoglobulin V-set domain;PF13895,Immunoglobulin domain	-	-	-	-
RALY-AS1	1.57389	0	5.81226	0.694588	0.0172979	0.0307366	-	-	-	-	-	-	-	-
PAXBP1-AS1	0.469521	0	5.81226	0.694588	0.0172979	0.0307366	ENSG00000238197	I7GC03,Macaca fascicularis brain cDNA clone: QflA-17923, similar to human protocadherin 11 X-linked	-	-	-	-	-	-
LINC00885	1.03921	0	5.81226	0.694588	0.0172979	0.0307366	ENSG00000224652	Q6ZPD5,cDNA FLJ25996 fis, clone DMC06615	-	-	-	-	-	-
EPB41L4A-AS2	1.3608	0	5.81226	0.694588	0.0172979	0.0307366	ENSG00000278921	Q9NUN8,HCG1658703	-	-	-	ENOG410JN2U,-;ENOG41112ZP,-	-	-
SEMA6A	0.173392	0	5.81226	0.694588	0.0172979	0.0307366	ENSG00000092421	A0A0A0MQU6,Sema domain, transmembrane domain	NP_001287709.1,semaphorin-6A isoform 1 precursor	PF01437,Plexin repeat;PF01403,Sema domain	IPR001627,Sema domain;IPR036352,Sema domain superfamily;IPR016201,PSI domain;IPR002165,Plexin repeat;IPR015943,WD40/YVTN repeat-like-containing domain superfamily;IPR027231,Semaphorin	KOG3611,Semaphorins;ENOG410XQZC,-	GO:0051642,biological_process,centrosome localization;GO:0004888,molecular_function,transmembrane signaling receptor activity;GO:0071526,biological_process,semaphorin-plexin signaling pathway;GO:0007411,biological_process,axon guidance;GO:0030215,molecular_function,semaphorin receptor binding;GO:0007166,biological_process,cell surface receptor signaling pathway;GO:2001224,biological_process,posit…	-
AC005532.5	1.53572	0	5.81226	0.694588	0.0172979	0.0307366	-	-	-	-	-	-	-	-
AC005281.1	0.758356	0	5.81226	0.694588	0.0172979	0.0307366	ENSG00000226690	A0A1B0GVB3,Uncharacterized protein	-	-	-	-	-	-
ST7-AS1	1.00565	0	5.81226	0.694588	0.0172979	0.0307366	ENSG00000227199	F7E759,Suppression of tumorigenicity 7	-	PF04184,ST7 protein	IPR007311,ST7	-	GO:0016021,cellular_component,integral component of membrane;GO:0016020,cellular_component,membrane	-
RP11-12A20.7	2.90028	0	5.81226	0.694588	0.0172979	0.0307366	ENSG00000274911	G3RPL7,Uncharacterized protein	-	PF15832,AM27 D and E protein family	-	-	-	-
PNCK	0.373145	0	5.81226	0.694588	0.0172979	0.0307366	ENSG00000130822	F7GKF1,Pregnancy up-regulated nonubiquitous CaM kinase	-	PF00069,Protein kinase domain	IPR011009,Protein kinase-like domain superfamily;IPR017441,Protein kinase, ATP binding site;IPR008271,Serine/threonine-protein kinase, active site;IPR000719,Protein kinase domain	KOG0032,Ca2+/calmodulin-dependent protein kinase, EF-Hand protein superfamily;ENOG410XRMJ,-	GO:0018105,biological_process,peptidyl-serine phosphorylation;GO:0035556,biological_process,intracellular signal transduction;GO:0004683,molecular_function,calmodulin-dependent protein kinase activity;GO:0004672,molecular_function,protein kinase activity;GO:0005622,cellular_component,intracellular;GO:0006468,biological_process,protein phosphorylation;GO:0000166,molecular_function,nucleotide bindi…	-
OSTCP2	3.74374	0	5.62328	0.57227	0.0336166	0.0553898	ENSG00000225294	H2RD97,Oligosaccharyltransferase complex subunit	XP_001137201.1,-;XP_009439788.1,-	PF04756,OST3 / OST6 family, transporter family	IPR021149,Oligosaccharyl transferase complex, subunit OST3/OST6	KOG3356,Predicted membrane protein;ENOG4111G0G,-	GO:0016740,molecular_function,transferase activity;GO:0016021,cellular_component,integral component of membrane;GO:0016020,cellular_component,membrane	-
ZCCHC24	0.329088	0	5.62328	0.57227	0.0336166	0.0553898	ENSG00000165424	A0A0D9RAE2,Zinc finger CCHC-type containing 24	XP_007961009.1,-	PF17180,Zinc-binding domain;PF13696,Zinc knuckle	IPR027377,Zinc-binding domain;IPR001878,Zinc finger, CCHC-type;IPR025829,Zinc knuckle CX2CX3GHX4C;IPR033446,Zinc finger domain-containing protein 24, zinc-binding domain;IPR036875,Zinc finger, CCHC-type superfamily	-	GO:0003676,molecular_function,nucleic acid binding;GO:0008270,molecular_function,zinc ion binding	-
RP11-144G7.2	1.7243	0	5.62328	0.57227	0.0336166	0.0553898	-	-	-	-	-	-	-	-
RP11-677M14.3	1.08077	0	5.62328	0.57227	0.0336166	0.0553898	-	-	-	-	-	-	-	-
RP11-20D14.6	0.729364	0	5.62328	0.57227	0.0336166	0.0553898	ENSG00000249790	Q8WYX4,Uncharacterized protein pp11662	-	-	-	-	-	-
KCNH3	0.389735	0	5.62328	0.57227	0.0336166	0.0553898	ENSG00000135519	B9EK44,Potassium voltage-gated channel, subfamily H	-	PF13426,PAS domain;PF00027,Cyclic nucleotide-binding domain;PF00520,Ion transport protein	IPR000014,PAS domain;IPR003950,Potassium channel, voltage-dependent, ELK;IPR000700,PAS-associated, C-terminal;IPR014710,RmlC-like jelly roll fold;IPR000595,Cyclic nucleotide-binding domain;IPR035965,PAS domain superfamily;IPR018490,Cyclic nucleotide-binding-like;IPR005821,Ion transport domain;IPR001610,PAC motif;IPR003938,Potassium channel, voltage-dependent, EAG/ELK/ERG	ENOG410XPSE,-;KOG0498,K+-channel ERG and related proteins, contain PAS/PAC sensor domain	GO:0005216,molecular_function,ion channel activity;GO:0005267,molecular_function,potassium channel activity;GO:0005244,molecular_function,voltage-gated ion channel activity;GO:0023014,biological_process,signal transduction by protein phosphorylation;GO:0000160,biological_process,phosphorelay signal transduction system;GO:0055085,biological_process,transmembrane transport;GO:0016020,cellular_compo…	-
B4GALNT1	0.2077	0	5.62328	0.57227	0.0336166	0.0553898	ENSG00000135454	H2Q6B9,Beta-1,4 N-acetylgalactosaminyltransferase	XP_509169.2,beta-1,4 N-acetylgalactosaminyltransferase 1 isoform X6	PF00535,lycosyl transferase family 2	IPR011143,Ganglioside GM2 synthase;IPR001173,Glycosyltransferase 2-like;IPR029044,Nucleotide-diphospho-sugar transferases	ENOG410IF61,-;ENOG4111N56,-	GO:0007283,biological_process,spermatogenesis;GO:0005794,cellular_component,Golgi apparatus;GO:0030259,biological_process,lipid glycosylation;GO:0001574,biological_process,ganglioside biosynthetic process;GO:0003947,molecular_function,(N-acetylneuraminyl)-galactosylglucosylceramide N-acetylgalactosaminyltransferase activity;GO:0016740,molecular_function,transferase activity;GO:0016757,molecular_f…	-
RP11-338K17.8	5.17826	0	5.62328	0.57227	0.0336166	0.0553898	-	-	-	-	-	-	-	-
RP11-321C24.1	5.27689	0	5.62328	0.57227	0.0336166	0.0553898	-	-	-	-	-	-	-	-
RPS4XP16	1.66722	0	5.62328	0.57227	0.0336166	0.0553898	ENSG00000224892	G3RUZ2,40S ribosomal protein S4	XP_004064423.1,-	PF16121,40S ribosomal protein S4 C-terminus;PF01479,S4 domain;PF00467,KOW motif;PF08071,RS4NT (NUC023) domain;PF00900,Ribosomal family S4e	IPR000876,Ribosomal protein S4e;IPR018199,Ribosomal protein S4e, N-terminal, conserved site;IPR013843,Ribosomal protein S4e, N-terminal;IPR032277,40S ribosomal protein S4, C-terminal domain;IPR038237,Ribosomal protein S4e, central domain superfamily;IPR013845,Ribosomal protein S4e, central region;IPR002942,RNA-binding S4 domain;IPR005824,KOW;IPR014722,Ribosomal protein L2, domain 2	-	GO:0019843,molecular_function,rRNA binding;GO:0003735,molecular_function,structural constituent of ribosome;GO:0003723,molecular_function,RNA binding;GO:0005840,cellular_component,ribosome;GO:0005622,cellular_component,intracellular;GO:0006412,biological_process,translation;GO:0030529,,	-
TMEM255B	0.228108	0	5.62328	0.57227	0.0336166	0.0553898	ENSG00000184497	K7DRT1,Family with sequence similarity 70, member B	-	PF14967,AM70 protein	IPR028014,FAM70 protein	-	GO:0016021,cellular_component,integral component of membrane;GO:0016020,cellular_component,membrane	-
AL157871.2	8.06903	0	5.62328	0.57227	0.0336166	0.0553898	-	-	-	-	-	-	-	-
LINC00052	0.845484	0	5.62328	0.57227	0.0336166	0.0553898	-	-	-	-	-	-	-	-
CRTC3-AS1	1.73691	0	5.62328	0.57227	0.0336166	0.0553898	ENSG00000259736	H2NP71,CREB regulated transcription coactivator 3	-	PF12886,Transducer of regulated CREB activity, C terminus;PF12885,Transducer of regulated CREB activity middle domain	IPR024785,Transducer of regulated CREB activity, C-terminal;IPR024784,Transducer of regulated CREB activity, middle domain;IPR024786,CREB-regulated transcription coactivator	ENOG410XPDQ,-;ENOG410IGNT,-	GO:0032793,biological_process,positive regulation of CREB transcription factor activity;GO:0005737,cellular_component,cytoplasm;GO:0050995,biological_process,negative regulation of lipid catabolic process;GO:0042116,biological_process,macrophage activation;GO:0043951,biological_process,negative regulation of cAMP-mediated signaling;GO:0045944,biological_process,positive regulation of transcriptio…	-
RP11-1348G14.4	0.846776	0	5.62328	0.57227	0.0336166	0.0553898	ENSG00000251417	F6YYL9,Uncharacterized protein	-	-	-	-	GO:0048741,biological_process,skeletal muscle fiber development	-
ZNF843	0.364203	0	5.62328	0.57227	0.0336166	0.0553898	ENSG00000176723	G1S2S2,Zinc finger protein 843	-	-	-	KOG1721,FOG: Zn-finger;COG5048,FOG: Zn-finger	-	-
RP11-77K12.9	0.650067	0	5.62328	0.57227	0.0336166	0.0553898	ENSG00000274220	D2HY25,Uncharacterized protein	-	PF03184,superfamily endonuclease;PF03221,Tc5 transposase DNA-binding domain;PF04218,CENP-B N-terminal DNA-binding domain	IPR006600,HTH CenpB-type DNA-binding domain;IPR009057,Homeobox-like domain superfamily;IPR036388,Winged helix-like DNA-binding domain superfamily;IPR004875,DDE superfamily endonuclease domain;IPR007889,DNA binding HTH domain, Psq-type	-	GO:0003676,molecular_function,nucleic acid binding;GO:0003677,molecular_function,DNA binding	-
RP5-1142A6.2	0.346513	0	5.62328	0.57227	0.0336166	0.0553898	ENSG00000224888	G1QIK9,Piezo-type mechanosensitive ion channel component	-	PF12166,Piezo non-specific cation channel, R-Ras-binding domain;PF15917,Piezo	IPR031805,Piezo domain;IPR027272,Piezo family;IPR031334,Piezo non-specific cation channel, R-Ras-binding domain	KOG1893,Uncharacterized conserved protein;ENOG410YVF6,-	GO:0033625,biological_process,positive regulation of integrin activation;GO:0055085,biological_process,transmembrane transport;GO:0005783,cellular_component,endoplasmic reticulum;GO:0033634,biological_process,positive regulation of cell-cell adhesion mediated by integrin;GO:0008381,molecular_function,mechanosensitive ion channel activity;GO:0016020,cellular_component,membrane;GO:0016021,cellular_…	-
LRRC37A9P	0.309193	0	5.62328	0.57227	0.0336166	0.0553898	ENSG00000271013	F7INR8,Uncharacterized protein	-	PF15779,Leucine-rich repeat-containing protein 37 family	IPR015753,Leucine-rich repeat-containing protein 37;IPR032754,Leucine-rich repeat-containing protein 37, N-terminal	ENOG410JC3Y,-;ENOG41118F7,-	-	-
RP11-159D12.8	0.286195	0	5.62328	0.57227	0.0336166	0.0553898	ENSG00000279207	A0A1X6RHA3,Integrase core domain	-	-	IPR036397,Ribonuclease H superfamily;IPR001584,Integrase, catalytic core;IPR012337,Ribonuclease H-like superfamily	-	GO:0003676,molecular_function,nucleic acid binding;GO:0015074,biological_process,DNA integration	-
RP11-334C17.5	0.324526	0	5.62328	0.57227	0.0336166	0.0553898	ENSG00000262580	G3RWD9,Caspase recruitment domain family member 14	XP_018883010.1,caspase recruitment domain-containing protein 14 isoform X1	PF00619,Caspase recruitment domain	IPR036034,PDZ superfamily;IPR027417,P-loop containing nucleoside triphosphate hydrolase;IPR001478,PDZ domain;IPR011029,Death-like domain superfamily;IPR008144,Guanylate kinase-like domain;IPR008145,Guanylate kinase/L-type calcium channel beta subunit;IPR001315,CARD domain	-	GO:0042981,biological_process,regulation of apoptotic process	-
CTD-2538C1.2	2.92645	0	5.62328	0.57227	0.0336166	0.0553898	-	-	-	-	-	-	-	-
CTC-453G23.8	2.93679	0	5.62328	0.57227	0.0336166	0.0553898	-	-	-	-	-	-	-	-
CTC-444N24.8	1.20016	0	5.62328	0.57227	0.0336166	0.0553898	-	-	-	-	-	-	-	-
D2HGDH	0.314874	0	5.62328	0.57227	0.0336166	0.0553898	ENSG00000180902	K6Z916,D-2-hydroxyglutarate dehydrogenase	XP_016806433.1,D-2-hydroxyglutarate dehydrogenase, mitochondrial isoform X5	PF02913,AD linked oxidases, C-terminal domain;PF01565,AD binding domain	IPR016167,FAD-binding, type 2, subdomain 1;IPR016171,Vanillyl-alcohol oxidase, C-terminal subdomain 2;IPR006094,FAD linked oxidase, N-terminal;IPR016166,FAD-binding, type 2;IPR036318,FAD-binding, type 2-like superfamily;IPR016164,FAD-linked oxidase-like, C-terminal;IPR004113,FAD-linked oxidase, C-terminal	COG0277,FAD/FMN-containing dehydrogenases;KOG1232,Proteins containing the FAD binding domain	GO:0055114,biological_process,oxidation-reduction process;GO:0016491,molecular_function,oxidoreductase activity;GO:0003824,molecular_function,catalytic activity;GO:0050660,molecular_function,flavin adenine dinucleotide binding;GO:0016614,molecular_function,oxidoreductase activity, acting on CH-OH group of donors	-
RP5-1184F4.5	1.68582	0	5.62328	0.57227	0.0336166	0.0553898	ENSG00000236772	Q4TEC3,Chromosome undetermined SCAF5507, whole genome shotgun sequence	-	-	-	-	-	-
FAM86HP	1.27765	0	5.62328	0.57227	0.0336166	0.0553898	ENSG00000253540	K7CSY4,Family with sequence similarity 86, member A	-	PF10294,Lysine methyltransferase;PF14904,amily of unknown function	IPR029426,FAM86;IPR029063,S-adenosyl-L-methionine-dependent methyltransferase;IPR019410,Lysine methyltransferase	-	-	-
WDFY3-AS1	3.37165	0	5.62328	0.57227	0.0336166	0.0553898	ENSG00000251260	L9L5H5,WD repeat and FYVE domain-containing protein 3	-	PF01363,YVE zinc finger;PF00400,WD domain, G-beta repeat;PF15787,omain of unknown function (DUF4704);PF02138,Beige/BEACH domain	IPR017455,Zinc finger, FYVE-related;IPR019775,WD40 repeat, conserved site;IPR011011,Zinc finger, FYVE/PHD-type;IPR017986,WD40-repeat-containing domain;IPR036372,BEACH domain superfamily;IPR000306,FYVE zinc finger;IPR000409,BEACH domain;IPR036322,WD40-repeat-containing domain superfamily;IPR031570,Domain of unknown function DUF4704;IPR015943,WD40/YVTN repeat-like-containing domain superfamily;IPR0…	-	GO:0046872,molecular_function,metal ion binding	-
AF146191.4	0.72145	0	5.62328	0.57227	0.0336166	0.0553898	-	-	-	-	-	-	-	-
DNAH5	0.100894	0	5.62328	0.57227	0.0336166	0.0553898	ENSG00000039139	G3RU88,Dynein axonemal heavy chain 5	-	PF12774,Hydrolytic ATP binding site of dynein motor region D1;PF12777,Microtubule-binding stalk of dynein motor;PF07728,AAA domain (dynein-related subfamily);PF03028,ynein heavy chain and region D6 of dynein motor;PF12780,P-loop containing dynein motor region D4;PF08393,ynein heavy chain, N-terminal region 2;PF08385,ynein heavy chain, N-terminal region 1;PF12781,ATP-binding dynein motor region D5…	-	-	-	-
RP11-1277A3.2	0.982981	0	5.62328	0.57227	0.0336166	0.0553898	ENSG00000246596	H2PHF8,SUMO interacting motifs containing 1	-	-	-	ENOG410IH7J,-;ENOG410XQXC,-	-	-
FILIP1	0.186641	0	5.62328	0.57227	0.0336166	0.0553898	ENSG00000118407	A8K2G7,cDNA FLJ76071, highly similar to Homo sapiens filamin A interacting protein 1	-	PF09727,Cortactin-binding protein-2	IPR019131,Cortactin-binding protein-2, N-terminal	ENOG410ZUI9,-;ENOG410IFP9,-	-	-
THBS2	0.259844	0	5.62328	0.57227	0.0336166	0.0553898	ENSG00000186340	K7CHV9,Thrombospondin 2	-	PF05735,Thrombospondin C-terminal region;PF00090,Thrombospondin type 1 domain;PF00093,von Willebrand factor type C domain;PF12947,domain;PF07645,Calcium-binding EGF domain;PF02412,Thrombospondin type 3 repeat	IPR024731,EGF domain;IPR008859,Thrombospondin, C-terminal;IPR000884,Thrombospondin type-1 (TSP1) repeat;IPR001007,VWFC domain;IPR003367,Thrombospondin, type 3-like repeat;IPR001791,Laminin G domain;IPR017897,Thrombospondin, type 3 repeat;IPR001881,EGF-like calcium-binding domain;IPR013320,Concanavalin A-like lectin/glucanase domain superfamily;IPR028974,TSP type-3 repeat;IPR000742,EGF-like domain…	-	GO:0016525,biological_process,negative regulation of angiogenesis;GO:0007155,biological_process,cell adhesion;GO:0031012,cellular_component,extracellular matrix;GO:0005509,molecular_function,calcium ion binding;GO:0030198,biological_process,extracellular matrix organization;GO:0008201,molecular_function,heparin binding;GO:0005576,cellular_component,extracellular region	-
RP4-584D14.5	2.8808	0	5.62328	0.57227	0.0336166	0.0553898	-	-	-	-	-	-	-	-
C8orf48	1.15033	0	5.62328	0.57227	0.0336166	0.0553898	ENSG00000164743	G3RHY8,Chromosome 8 open reading frame 48	XP_004046732.1,uncharacterized protein C8orf48 homolog	PF15379,omain of unknown function (DUF4606)	IPR027932,Protein of unknown function DUF4606	-	-	-
DNAJB5	0.282163	0	5.62328	0.57227	0.0336166	0.0553898	ENSG00000137094	A0A096P196,DnaJ heat shock protein family	XP_003911602.1,-	PF01556,naJ C terminal domain;PF00226,naJ domain	IPR002939,Chaperone DnaJ, C-terminal;IPR036869,Chaperone J-domain superfamily;IPR018253,DnaJ domain, conserved site;IPR008971,HSP40/DnaJ peptide-binding;IPR001623,DnaJ domain	-	GO:0051087,molecular_function,chaperone binding;GO:0006457,biological_process,protein folding;GO:0000122,biological_process,negative regulation of transcription by RNA polymerase II;GO:0006986,biological_process,response to unfolded protein;GO:0051082,molecular_function,unfolded protein binding;GO:0005829,cellular_component,cytosol;GO:0005634,cellular_component,nucleus	-
ZNF91	1.09629	0.0315152	4.98067	2.76853	2.84e-09	2.35e-08	ENSG00000167232	H2RD58,Zinc finger protein 91	-	PF00096,Zinc finger, C2H2 type;PF01352,KRAB box	IPR013087,Zinc finger C2H2-type;IPR001909,Krueppel-associated box;IPR036051,KRAB domain superfamily;IPR036236,Zinc finger C2H2 superfamily	KOG1721,FOG: Zn-finger;COG5048,FOG: Zn-finger	GO:0006355,biological_process,regulation of transcription, DNA-templated;GO:0003676,molecular_function,nucleic acid binding;GO:0046872,molecular_function,metal ion binding;GO:0005622,cellular_component,intracellular	-
POMZP3	4.84873	0.176068	4.64478	2.47914	2.71e-07	1.44e-06	ENSG00000146707	A0A0J9YWR1,POM121 and ZP3 fusion protein	-	PF00100,Zona pellucida-like domain	IPR001507,Zona pellucida domain	-	-	-
ALG1L	9.85896	0.388687	4.52661	2.37903	7.6e-07	3.68e-06	ENSG00000189366	A0A087WZJ8,Putative glycosyltransferase ALG1-like	NP_001182152.1,putative glycosyltransferase ALG1-like isoform 1	-	IPR026051,Chitobiosyldiphosphodolichol beta-mannosyltransferase ALG1-like	KOG2941,Beta-1,4-mannosyltransferase;COG0438,Glycosyltransferase	GO:0016757,molecular_function,transferase activity, transferring glycosyl groups	-
ZNF100	1.14923	0.0495559	4.39788	2.27109	3.62e-06	1.52e-05	ENSG00000197020	A0A075B7G6,Zinc finger protein 100	-	PF00096,Zinc finger, C2H2 type;PF01352,KRAB box	IPR013087,Zinc finger C2H2-type;IPR001909,Krueppel-associated box;IPR036051,KRAB domain superfamily;IPR036236,Zinc finger C2H2 superfamily	-	GO:0006355,biological_process,regulation of transcription, DNA-templated;GO:0003676,molecular_function,nucleic acid binding;GO:0046872,molecular_function,metal ion binding;GO:0005622,cellular_component,intracellular	-
GIN1	1.81701	0.0783509	4.39788	2.27109	3.62e-06	1.52e-05	ENSG00000145723	G3SDM7,Gypsy retrotransposon integrase 1	XP_004042371.1,gypsy retrotransposon integrase-like protein 1 isoform X1	-	IPR036397,Ribonuclease H superfamily;IPR001584,Integrase, catalytic core;IPR012337,Ribonuclease H-like superfamily	-	GO:0015074,biological_process,DNA integration;GO:0003676,molecular_function,nucleic acid binding	-
LDHAP5	11.8348	0.52679	4.35229	2.23315	6.1e-06	2.44e-05	ENSG00000213574	G7PQL6,L-lactate dehydrogenase	-	PF00056,lactate/malate dehydrogenase, NAD binding domain;PF02866,lactate/malate dehydrogenase, alpha/beta C-terminal domain	IPR022383,Lactate/malate dehydrogenase, C-terminal;IPR036291,NAD(P)-binding domain superfamily;IPR018177,L-lactate dehydrogenase, active site;IPR011304,L-lactate dehydrogenase;IPR001236,Lactate/malate dehydrogenase, N-terminal;IPR015955,Lactate dehydrogenase/glycoside hydrolase, family 4, C-terminal;IPR001557,L-lactate/malate dehydrogenase	-	GO:0005975,biological_process,carbohydrate metabolic process;GO:0005737,cellular_component,cytoplasm;GO:0016616,molecular_function,oxidoreductase activity, acting on the CH-OH group of donors, NAD or NADP as acceptor;GO:0003824,molecular_function,catalytic activity;GO:0016491,molecular_function,oxidoreductase activity;GO:0055114,biological_process,oxidation-reduction process;GO:0004459,molecular_…	-
ADAD2	1.79063	0.0797041	4.35229	2.23315	6.1e-06	2.44e-05	ENSG00000140955	H2QBM2,Uncharacterized protein	XP_016785776.1,adenosine deaminase domain-containing protein 2 isoform X11	PF00035,ouble-stranded RNA binding motif;PF02137,Adenosine-deaminase (editase) domain	IPR002466,Adenosine deaminase/editase;IPR014720,Double-stranded RNA-binding domain	KOG2777,tRNA-specific adenosine deaminase 1;ENOG410XT0Z,-	GO:0003723,molecular_function,RNA binding;GO:0004000,molecular_function,adenosine deaminase activity;GO:0006396,biological_process,RNA processing	-
DNAJC27	1.26668	0.0582616	4.30521	2.19414	1.03e-05	3.92e-05	ENSG00000115137	H2QHJ6,Uncharacterized protein	XP_001147370.1,-	PF00071,Ras family;PF00226,naJ domain	IPR036869,Chaperone J-domain superfamily;IPR001623,DnaJ domain;IPR005225,Small GTP-binding protein domain;IPR001806,Small GTPase superfamily;IPR027417,P-loop containing nucleoside triphosphate hydrolase	COG1100,GTPase SAR1 and related small G proteins;KOG0098,GTPase Rab2, small G protein superfamily	GO:0005525,molecular_function,GTP binding;GO:0070374,biological_process,positive regulation of ERK1 and ERK2 cascade;GO:0071701,biological_process,regulation of MAPK export from nucleus;GO:0003924,molecular_function,GTPase activity;GO:0005634,cellular_component,nucleus;GO:0043410,biological_process,positive regulation of MAPK cascade;GO:0005739,cellular_component,mitochondrion	-
RSPH10B	1.42676	0.0656246	4.30521	2.19414	1.03e-05	3.92e-05	ENSG00000155026	H2QU64,Uncharacterized protein	XP_003318355.1,radial spoke head 10 homolog B isoform X2	PF02493,MORN repeat	IPR003409,MORN motif	KOG0231,Junctional membrane complex protein Junctophilin and related MORN repeat proteins;COG4642,Uncharacterized protein conserved in bacteria	-	-
GATA4	1.54993	0.0737482	4.25654	2.15398	1.74e-05	6.3e-05	ENSG00000136574	H2PPJ2,GATA binding protein 4	XP_003777251.1,transcription factor GATA-4 isoform X2	PF00320,ATA zinc finger;PF05349,ATA-type transcription activator, N-terminal	IPR008013,GATA-type transcription activator, N-terminal;IPR016375,Transcription factor GATA-4/5/6;IPR000679,Zinc finger, GATA-type;IPR013088,Zinc finger, NHR/GATA-type	COG5641,GATA Zn-finger-containing transcription factor;KOG1601,GATA-4/5/6 transcription factors	GO:0003197,biological_process,endocardial cushion development;GO:0006355,biological_process,regulation of transcription, DNA-templated;GO:0008134,molecular_function,transcription factor binding;GO:0005634,cellular_component,nucleus;GO:0003700,molecular_function,DNA binding transcription factor activity;GO:0045893,biological_process,positive regulation of transcription, DNA-templated;GO:0008584,bi…	-
ZYG11A	1.41646	0.0698047	4.20617	2.11263	1.74e-05	6.3e-05	ENSG00000203995	H2R931,Uncharacterized protein	-	-	IPR011989,Armadillo-like helical;IPR016024,Armadillo-type fold	ENOG410XPSX,-;KOG3665,ZYG-1-like serine/threonine protein kinases	GO:0016567,biological_process,protein ubiquitination;GO:0051438,biological_process,regulation of ubiquitin-protein transferase activity;GO:0004842,molecular_function,ubiquitin-protein transferase activity;GO:0031462,cellular_component,Cul2-RING ubiquitin ligase complex	-
RP11-486L19.2	2.31668	0.114168	4.20617	2.11263	1.74e-05	6.3e-05	ENSG00000250685	Q6ZW55,cDNA FLJ41588 fis, clone CTONG2020806	-	-	-	-	-	-
RP5-1112D6.8	1.48585	0.0759359	4.15397	2.06999	2.95e-05	0.000100331	ENSG00000272356	H2PK26,Uncharacterized protein	-	-	-	-	-	-
C9orf72	0.979298	0.054052	4.04356	1.98053	8.47e-05	0.000260038	ENSG00000147894	A0A1U7SX69,protein C9orf72 homolog	XP_008046151.1,-	-	IPR027819,Guanine nucleotide exchange C9orf72	-	GO:0044304,cellular_component,main axon;GO:2000785,biological_process,regulation of autophagosome assembly;GO:0005634,cellular_component,nucleus;GO:0005615,cellular_component,extracellular space;GO:0010506,biological_process,regulation of autophagy;GO:0017137,molecular_function,Rab GTPase binding;GO:0005737,cellular_component,cytoplasm;GO:0016239,biological_process,positive regulation of macroaut…	-
USP30-AS1	8.32558	0.499487	3.92399	1.88485	0.000243751	0.000677843	-	-	-	-	-	-	-	-
CACTIN-AS1	2.85498	0.171283	3.92399	1.88485	0.000243751	0.000677843	ENSG00000226800	H2QEZ2,Uncharacterized protein	-	-	-	-	-	-
SATB2	0.498411	0.0299018	3.92399	1.88485	0.000243751	0.000677843	ENSG00000119042	H2QJ76,DNA-binding protein SATB	-	PF02376,CUT domain;PF16534,Ubiquitin-like oligomerisation domain of SATB;PF16557,CUT1-like DNA-binding domain of SATB;PF00046,Homeobox domain	IPR032392,SATB, ubiquitin-like oligomerisation domain;IPR009057,Homeobox-like domain superfamily;IPR010982,Lambda repressor-like, DNA-binding domain superfamily;IPR038216,SATB, CUTL domain superfamily;IPR032355,SATB, CUT1-like DNA-binding domain;IPR003350,CUT domain;IPR001356,Homeobox domain;IPR038224,SATB, ULD domain superfamily	ENOG410ISJ9,-;ENOG41113K2,-	GO:0003677,molecular_function,DNA binding;GO:0043565,molecular_function,sequence-specific DNA binding;GO:0006357,biological_process,regulation of transcription by RNA polymerase II;GO:0006355,biological_process,regulation of transcription, DNA-templated;GO:0006351,biological_process,transcription, DNA-templated;GO:0005634,cellular_component,nucleus	-
POU6F2	0.663538	0.0398085	3.92399	1.88485	0.000243751	0.000677843	ENSG00000106536	A0A140GPP8,POU domain protein	-	PF00157,Pou domain - N-terminal to homeobox domain;PF00046,Homeobox domain	IPR009057,Homeobox-like domain superfamily;IPR010982,Lambda repressor-like, DNA-binding domain superfamily;IPR033056,POU domain, class 6, transcription factor 2;IPR013847,POU domain;IPR001356,Homeobox domain;IPR000327,POU-specific domain	-	GO:0006355,biological_process,regulation of transcription, DNA-templated;GO:0003677,molecular_function,DNA binding;GO:0003700,molecular_function,DNA binding transcription factor activity;GO:0005634,cellular_component,nucleus;GO:0006366,biological_process,transcription by RNA polymerase II;GO:0006351,biological_process,transcription, DNA-templated;GO:0007275,biological_process,multicellular organi…	-
ZNF223	1.56928	0.098427	3.86027	1.83439	0.00041343	0.00109125	ENSG00000178386	K7ENM7,Uncharacterized protein	-	PF00096,Zinc finger, C2H2 type;PF01352,KRAB box	IPR013087,Zinc finger C2H2-type;IPR001909,Krueppel-associated box;IPR036051,KRAB domain superfamily;IPR036236,Zinc finger C2H2 superfamily	KOG1721,FOG: Zn-finger;COG5048,FOG: Zn-finger	GO:0006355,biological_process,regulation of transcription, DNA-templated;GO:0003676,molecular_function,nucleic acid binding;GO:0046872,molecular_function,metal ion binding;GO:0005622,cellular_component,intracellular	-
TAMM41	0.881709	0.0553018	3.86027	1.83439	0.00041343	0.00109125	ENSG00000144559	A0A1D5Q3J2,TAM41 mitochondrial translocator assembly and maintenance homolog	-	-	IPR015222,Phosphatidate cytidylyltransferase, mitochondrial	-	GO:0004605,molecular_function,phosphatidate cytidylyltransferase activity;GO:0032049,biological_process,cardiolipin biosynthetic process	-
RP13-131K19.6	13.3609	0.838014	3.86027	1.83439	0.00041343	0.00109125	ENSG00000272434	L8Y3Y1,Inosine-5'-monophosphate dehydrogenase	-	PF00478,IMP dehydrogenase / GMP reductase domain;PF00571,CBS domain	IPR001093,IMP dehydrogenase/GMP reductase;IPR000644,CBS domain;IPR015875,IMP dehydrogenase / GMP reductase, conserved site;IPR005990,Inosine-5'-monophosphate dehydrogenase;IPR013785,Aldolase-type TIM barrel	-	GO:0006164,biological_process,purine nucleotide biosynthetic process;GO:0005737,cellular_component,cytoplasm;GO:0003824,molecular_function,catalytic activity;GO:0046872,molecular_function,metal ion binding;GO:0005634,cellular_component,nucleus;GO:0016491,molecular_function,oxidoreductase activity;GO:0055114,biological_process,oxidation-reduction process;GO:0003938,molecular_function,IMP dehydroge…	-
GXYLT2	1.42463	0.0893546	3.86027	1.83439	0.00041343	0.00109125	ENSG00000172986	G3QQT0,Glucoside xylosyltransferase 2	-	PF01501,lycosyl transferase family 8	IPR029044,Nucleotide-diphospho-sugar transferases;IPR002495,Glycosyl transferase, family 8	-	GO:0016757,molecular_function,transferase activity, transferring glycosyl groups;GO:0016740,molecular_function,transferase activity	-
IGSF11	1.06637	0.0668837	3.86027	1.83439	0.00041343	0.00109125	ENSG00000144847	G3SKJ6,Immunoglobulin superfamily member 11	XP_018880342.1,-	PF13927,Immunoglobulin domain;PF07686,Immunoglobulin V-set domain	IPR007110,Immunoglobulin-like domain;IPR036179,Immunoglobulin-like domain superfamily;IPR013783,Immunoglobulin-like fold;IPR003599,Immunoglobulin subtype;IPR003598,Immunoglobulin subtype 2;IPR013106,Immunoglobulin V-set domain	-	GO:0016021,cellular_component,integral component of membrane;GO:0016020,cellular_component,membrane	-
KLF9	1.00949	0.0633166	3.86027	1.83439	0.00041343	0.00109125	ENSG00000119138	H2PSC7,Kruppel like factor 9	XP_002819900.1,-	PF00096,Zinc finger, C2H2 type	IPR013087,Zinc finger C2H2-type;IPR036236,Zinc finger C2H2 superfamily	KOG1721,FOG: Zn-finger;COG5048,FOG: Zn-finger	GO:0097067,biological_process,cellular response to thyroid hormone stimulus;GO:0071387,biological_process,cellular response to cortisol stimulus;GO:0003676,molecular_function,nucleic acid binding;GO:0005886,cellular_component,plasma membrane;GO:0005829,cellular_component,cytosol;GO:0010839,biological_process,negative regulation of keratinocyte proliferation;GO:0005634,cellular_component,nucleus;G…	-
RP11-706O15.3	1.19245	0.0747919	3.86027	1.83439	0.00041343	0.00109125	ENSG00000234449	H2QW07,Uncharacterized protein	-	-	-	-	-	-
NIF3L1	9.45055	0.660279	3.8045	3.46685	1.57e-11	2.17e-10	ENSG00000196290	A0A024R3V7,NIF3-like protein 1	XP_016860119.1,-;XP_005246799.1,-;NP_001129511.1,NIF3-like protein 1 isoform 1;XP_011509884.1,-;XP_011509885.1,-;XP_011509886.1,-	PF01784,NIF3 (NGG1p interacting factor 3)	IPR002678,GTP cyclohydrolase 1 type 2/Nif3;IPR017222,NIF3-like protein 1, animal;IPR036069,GTP cyclohydrolase 1 type 2/Nif3 superfamily	KOG4131,Ngg1-interacting factor 3 protein NIF3L1;COG0327,Uncharacterized conserved protein	GO:0005737,cellular_component,cytoplasm;GO:0005634,cellular_component,nucleus;GO:0005739,cellular_component,mitochondrion;GO:0030182,biological_process,neuron differentiation;GO:1903507,biological_process,negative regulation of nucleic acid-templated transcription	-
RP11-172H24.4	1.13025	0.0742664	3.7936	1.78201	0.000700954	0.00175135	ENSG00000278291	H2PAT5,Uncharacterized protein	-	-	-	ENOG410J5KQ,-;ENOG410XV2W,-	-	-
RP11-332M2.1	5.47985	0.36007	3.7936	1.78201	0.000700954	0.00175135	ENSG00000203644	Q6ZPD3,cDNA FLJ26015 fis, clone MPC03596	-	-	-	-	-	-
RP11-804A23.4	28.5339	2.00202	3.78704	3.08126	4.53e-09	3.6e-08	-	-	-	-	-	-	-	-
DDIAS	1.73458	0.122743	3.75237	2.54755	8.97e-07	4.27e-06	ENSG00000165490	A8K8N4,cDNA FLJ78751	-	PF08646,Replication factor-A C terminal domain	IPR013955,Replication factor A, C-terminal;IPR012340,Nucleic acid-binding, OB-fold	ENOG41122YI,-;ENOG410IGF0,-	-	-
ZNF41	3.77236	0.273966	3.74875	3.41838	5.33e-11	6.47e-10	ENSG00000147124	A0A024R1C4,Zinc finger protein 41, isoform CRA_d	NP_001311076.1,-;NP_001311073.1,-;XP_016885306.1,-;NP_001311079.1,-;NP_001311069.1,-;NP_009061.1,-;NP_700359.1,zinc finger protein 41 isoform a	PF00096,Zinc finger, C2H2 type;PF01352,KRAB box	IPR013087,Zinc finger C2H2-type;IPR001909,Krueppel-associated box;IPR036051,KRAB domain superfamily;IPR036236,Zinc finger C2H2 superfamily	KOG1721,FOG: Zn-finger;COG5048,FOG: Zn-finger	GO:0006355,biological_process,regulation of transcription, DNA-templated;GO:0003676,molecular_function,nucleic acid binding;GO:0046872,molecular_function,metal ion binding;GO:0005622,cellular_component,intracellular	-
PLCB4	0.68829	0.0474875	3.72371	1.72755	0.000700954	0.00175135	ENSG00000101333	G1RW33,Phosphoinositide phospholipase C	XP_012365925.1,1-phosphatidylinositol 4,5-bisphosphate phosphodiesterase beta-4 isoform X1	PF06631,Protein of unknown function (DUF1154);PF09279,Phosphoinositide-specific phospholipase C, efhand-like;PF00387,Phosphatidylinositol-specific phospholipase C, Y domain;PF00168,C2 domain;PF00388,Phosphatidylinositol-specific phospholipase C, X domain	IPR000909,Phosphatidylinositol-specific phospholipase C, X domain;IPR001192,Phosphoinositide phospholipase C family;IPR017946,PLC-like phosphodiesterase, TIM beta/alpha-barrel domain superfamily;IPR037862,PLC-beta, PH domain;IPR016280,Phosphatidylinositol-4, 5-bisphosphate phosphodiesterase beta;IPR000008,C2 domain;IPR035892,C2 domain superfamily;IPR009535,Phospholipase C-beta, conserved site;IPR…	KOG0169,Phosphoinositide-specific phospholipase C;ENOG410XPSW,-	GO:0006629,biological_process,lipid metabolic process;GO:0004435,molecular_function,phosphatidylinositol phospholipase C activity;GO:0016787,molecular_function,hydrolase activity;GO:0030425,cellular_component,dendrite;GO:0005790,cellular_component,smooth endoplasmic reticulum;GO:0035556,biological_process,intracellular signal transduction;GO:0004871,molecular_function,signal transducer activity;G…	-
PWP2	0.686103	0.0473365	3.72371	1.72755	0.000700954	0.00175135	ENSG00000241945	A0A0B4J2E5,Uncharacterized protein	XP_006723973.1,periodic tryptophan protein 2 homolog;XP_011507205.1,-	PF00400,WD domain, G-beta repeat;PF04003,ip2/Utp12 Family	IPR011047,Quinoprotein alcohol dehydrogenase-like superfamily;IPR007148,Small-subunit processome, Utp12;IPR019775,WD40 repeat, conserved site;IPR017986,WD40-repeat-containing domain;IPR027145,Periodic tryptophan protein 2;IPR015943,WD40/YVTN repeat-like-containing domain superfamily;IPR020472,G-protein beta WD-40 repeat;IPR001680,WD40 repeat	ENOG410XP2P,-;KOG0291,WD40-repeat-containing subunit of the 18S rRNA processing complex	GO:0032040,cellular_component,small-subunit processome;GO:0030515,molecular_function,snoRNA binding;GO:0000028,biological_process,ribosomal small subunit assembly;GO:0034388,cellular_component,Pwp2p-containing subcomplex of 90S preribosome;GO:0000462,biological_process,maturation of SSU-rRNA from tricistronic rRNA transcript (SSU-rRNA, 5.8S rRNA, LSU-rRNA)	-
RCL1	1.12674	0.0777375	3.72371	1.72755	0.000700954	0.00175135	ENSG00000120158	K7DRH4,RNA terminal phosphate cyclase-like 1	-	PF01137,RNA 3'-terminal phosphate cyclase;PF05189,RNA 3'-terminal phosphate cyclase (RTC), insert domain	IPR000228,RNA 3'-terminal phosphate cyclase;IPR016443,RNA 3'-terminal phosphate cyclase type 2;IPR013791,RNA 3'-terminal phosphate cyclase, insert domain;IPR036553,RNA 3'-terminal phosphate cyclase, insert domain superfamily;IPR023797,RNA 3'-terminal phosphate cyclase domain;IPR020719,RNA 3'-terminal phosphate cyclase-like, conserved site;IPR037136,RNA 3'-terminal phosphate cyclase domain superfa…	KOG3980,RNA 3'-terminal phosphate cyclase;COG0430,RNA 3'-terminal phosphate cyclase	GO:0042254,biological_process,ribosome biogenesis;GO:0003824,molecular_function,catalytic activity;GO:0006396,biological_process,RNA processing;GO:0005730,cellular_component,nucleolus	-
ABHD17B	1.605	0.110735	3.72371	1.72755	0.000700954	0.00175135	ENSG00000107362	H2QXC4,Abhydrolase domain containing 17B	XP_009455002.2,-;XP_009455000.2,-;XP_016816444.1,-	PF12146,Serine aminopeptidase, S33;PF00326,Prolyl oligopeptidase family	IPR022742,Serine aminopeptidase, S33;IPR029058,Alpha/Beta hydrolase fold	COG1073,Hydrolases of the alpha/beta superfamily;KOG1552,Predicted alpha/beta hydrolase	GO:1905668,biological_process,positive regulation of protein localization to endosome;GO:0014069,cellular_component,postsynaptic density;GO:0055038,cellular_component,recycling endosome membrane;GO:0002084,biological_process,protein depalmitoylation;GO:0018345,biological_process,protein palmitoylation;GO:1902817,biological_process,negative regulation of protein localization to microtubule;GO:0008…	-
WDR19	0.990198	0.0738563	3.67671	2.48476	2.4e-06	1.05e-05	ENSG00000157796	H2QPC5,WD repeat domain 19	XP_517152.2,WD repeat-containing protein 19 isoform X2	PF15911,WD domain, G-beta repeat	IPR015943,WD40/YVTN repeat-like-containing domain superfamily;IPR001680,WD40 repeat;IPR017986,WD40-repeat-containing domain;IPR011990,Tetratricopeptide-like helical domain superfamily	KOG2247,WD40 repeat-containing protein;ENOG410XR20,-	GO:0097730,cellular_component,non-motile cilium;GO:0007224,biological_process,smoothened signaling pathway;GO:0032391,cellular_component,photoreceptor connecting cilium;GO:0060830,biological_process,ciliary receptor clustering involved in smoothened signaling pathway;GO:0000902,biological_process,cell morphogenesis;GO:0060271,biological_process,cilium assembly;GO:0060831,biological_process,smooth…	-
FZD4	2.86252	0.221904	3.66163	3.63498	1.97e-12	3.31e-11	ENSG00000174804	A0A096MVT8,Frizzled class receptor 4	XP_003910563.1,-	PF01392,z domain;PF01534,rizzled/Smoothened family membrane region	IPR015526,Frizzled/secreted frizzled-related protein;IPR017981,GPCR, family 2-like;IPR036790,Frizzled cysteine-rich domain superfamily;IPR000539,Frizzled/Smoothened, transmembrane domain;IPR026551,Frizzled-4;IPR020067,Frizzled domain	-	GO:0061299,biological_process,retina vasculature morphogenesis in camera-type eye;GO:0001570,biological_process,vasculogenesis;GO:0030947,biological_process,regulation of vascular endothelial growth factor receptor signaling pathway;GO:0016055,biological_process,Wnt signaling pathway;GO:0019955,molecular_function,cytokine binding;GO:0005886,cellular_component,plasma membrane;GO:0046982,molecular_…	-
SAP130	25.6303	2.02308	3.65807	5.94734	1.41e-31	4.13e-29	ENSG00000136715	K7C519,Sin3A-associated protein, 130kDa	XP_525910.3,-	PF16014,Histone deacetylase complex subunit SAP130 C-terminus	IPR024137,Histone deacetylase complex subunit SAP130;IPR031963,Histone deacetylase complex subunit SAP130, C-terminal domain	ENOG410ZRAM,-;ENOG410IJKN,-	GO:0006355,biological_process,regulation of transcription, DNA-templated;GO:0016607,cellular_component,nuclear speck;GO:0000122,biological_process,negative regulation of transcription by RNA polymerase II	-
LYPD5	0.886219	0.0643613	3.65025	1.67085	0.00118753	0.00282164	ENSG00000159871	B4DWV3,cDNA FLJ54820, highly similar to Ly6/PLAUR domain-containing protein 5	-	PF00021,u-PAR/Ly-6 domain	IPR018363,CD59 antigen, conserved site;IPR016054,Ly-6 antigen/uPA receptor-like	ENOG410IX2N,-;ENOG4111DV8,-	-	-
ZNF234	0.865977	0.0628913	3.65025	1.67085	0.00118753	0.00282164	ENSG00000263002	A0A024R0N3,Zinc finger protein 234, isoform CRA_a	NP_006621.1,zinc finger protein 234;NP_001138296.1,-;XP_016881638.1,-;XP_006723037.1,-	PF00096,Zinc finger, C2H2 type;PF01352,KRAB box	IPR013087,Zinc finger C2H2-type;IPR001909,Krueppel-associated box;IPR036051,KRAB domain superfamily;IPR036236,Zinc finger C2H2 superfamily	KOG1721,FOG: Zn-finger;COG5048,FOG: Zn-finger	GO:0006355,biological_process,regulation of transcription, DNA-templated;GO:0003676,molecular_function,nucleic acid binding;GO:0046872,molecular_function,metal ion binding;GO:0005622,cellular_component,intracellular	-
AC074212.6	4.39313	0.319049	3.65025	1.67085	0.00118753	0.00282164	ENSG00000267395	U6D1S4,Dystrophia myotonica-protein kinase	-	PF08826,MPK coiled coil domain like	IPR014930,Myotonic dystrophy protein kinase, coiled coil	-	GO:0016301,molecular_function,kinase activity;GO:0006468,biological_process,protein phosphorylation;GO:0005524,molecular_function,ATP binding;GO:0004674,molecular_function,protein serine/threonine kinase activity;GO:0016310,biological_process,phosphorylation	-
RP3-337O18.9	7.92925	0.575858	3.65025	1.67085	0.00118753	0.00282164	ENSG00000271984	U3KQU6,Carboxypeptidase	-	PF00450,Serine carboxypeptidase	IPR018202,Serine carboxypeptidase, serine active site;IPR001563,Peptidase S10, serine carboxypeptidase;IPR029058,Alpha/Beta hydrolase fold	KOG1282,Serine carboxypeptidases (lysosomal cathepsin A);COG2939,Carboxypeptidase C (cathepsin A)	GO:0006508,biological_process,proteolysis;GO:0004180,molecular_function,carboxypeptidase activity;GO:0016787,molecular_function,hydrolase activity;GO:0008233,molecular_function,peptidase activity;GO:0004185,molecular_function,serine-type carboxypeptidase activity	-
NKD2	1.56386	0.113575	3.65025	1.67085	0.00118753	0.00282164	ENSG00000145506	G3QPA3,Naked cuticle homolog 2	-	-	IPR002048,EF-hand domain;IPR011992,EF-hand domain pair	-	GO:0005509,molecular_function,calcium ion binding	-
PLBD2	34.4001	2.74091	3.64652	6.62862	2.09e-37	7.48e-35	ENSG00000151176	K7B3B5,Phospholipase B-like	XP_016779803.1,putative phospholipase B-like 2	PF04916,Phospholipase B	IPR007000,Phospholipase B-like	ENOG410XQRV,-;KOG3774,Uncharacterized conserved protein Lama	GO:0006629,biological_process,lipid metabolic process;GO:0016787,molecular_function,hydrolase activity;GO:0016042,biological_process,lipid catabolic process	-
PMP22	2.92259	0.224043	3.63734	2.45225	2.4e-06	1.05e-05	ENSG00000109099	J3KT36,Peripheral myelin protein 22	-	-	-	-	-	-
ALDH3B2	5.06484	0.405148	3.60962	3.29827	6.37e-10	6.15e-09	ENSG00000132746	H2R571,Uncharacterized protein	-	PF00171,Aldehyde dehydrogenase family	IPR016163,Aldehyde dehydrogenase, C-terminal;IPR016160,Aldehyde dehydrogenase, cysteine active site;IPR015590,Aldehyde dehydrogenase domain;IPR016162,Aldehyde dehydrogenase, N-terminal;IPR016161,Aldehyde/histidinol dehydrogenase;IPR029510,Aldehyde dehydrogenase, glutamic acid active site	COG1012,NAD-dependent aldehyde dehydrogenases;KOG2456,Aldehyde dehydrogenase	GO:0016620,molecular_function,oxidoreductase activity, acting on the aldehyde or oxo group of donors, NAD or NADP as acceptor;GO:0055114,biological_process,oxidation-reduction process;GO:0016491,molecular_function,oxidoreductase activity;GO:0008152,biological_process,metabolic process	-
ZSCAN30	1.54156	0.12272	3.60531	2.92655	6.37e-08	3.91e-07	ENSG00000186814	H2R2W3,Zinc finger and SCAN domain containing 30	XP_529948.2,zinc finger and SCAN domain-containing protein 30 isoform X1;XP_016789019.1,-;XP_009432158.1,-	PF00096,Zinc finger, C2H2 type;PF02023,SCAN domain	IPR003309,SCAN domain;IPR013087,Zinc finger C2H2-type;IPR038269,SCAN domain superfamily;IPR036236,Zinc finger C2H2 superfamily	KOG1721,FOG: Zn-finger;COG5048,FOG: Zn-finger	GO:0003676,molecular_function,nucleic acid binding;GO:0003700,molecular_function,DNA binding transcription factor activity;GO:0046872,molecular_function,metal ion binding;GO:0006355,biological_process,regulation of transcription, DNA-templated;GO:0006351,biological_process,transcription, DNA-templated;GO:0005634,cellular_component,nucleus	-
AC004510.3	190.252	15.673	3.59722	6.13191	1.18e-32	3.81e-30	-	-	-	-	-	-	-	-
LINC00857	3.82824	0.301855	3.59686	2.41896	3.93e-06	1.64e-05	-	-	-	-	-	-	-	-
PTGDR2	2.87085	0.226365	3.59686	2.41896	3.93e-06	1.64e-05	ENSG00000183134	A8K5Q6,cDNA FLJ75694, highly similar to Homo sapiens G protein-coupled receptor 44	-	PF00001,7 transmembrane receptor (rhodopsin family)	IPR017452,GPCR, rhodopsin-like, 7TM;IPR000276,G protein-coupled receptor, rhodopsin-like	ENOG410YAX7,-;ENOG410IV6V,-	GO:0007186,biological_process,G-protein coupled receptor signaling pathway;GO:0004871,molecular_function,signal transducer activity;GO:0007165,biological_process,signal transduction;GO:0016020,cellular_component,membrane;GO:0004930,molecular_function,G-protein coupled receptor activity;GO:0016021,cellular_component,integral component of membrane	-
RP11-245P10.8	8.90476	0.682632	3.57286	1.6117	0.00200946	0.00453871	ENSG00000270094	F7GJX2,Uncharacterized protein	-	PF15227,zinc finger of C3HC4-type, RING;PF00643,B-box zinc finger;PF13765,SPRY-associated domain;PF00622,SPRY domain	IPR001841,Zinc finger, RING-type;IPR000315,B-box-type zinc finger;IPR017907,Zinc finger, RING-type, conserved site;IPR013083,Zinc finger, RING/FYVE/PHD-type	ENOG4111G04,-;KOG2177,Predicted E3 ubiquitin ligase	GO:0008270,molecular_function,zinc ion binding;GO:0046872,molecular_function,metal ion binding;GO:0005622,cellular_component,intracellular	-
TRDMT1	0.405722	0.0311024	3.57286	1.6117	0.00200946	0.00453871	ENSG00000107614	Q6ICS7,DNMT2 protein	NP_004403.1,tRNA (cytosine(38)-C(5))-methyltransferase isoform a	PF00145,C-5 cytosine-specific DNA methylase	IPR001525,C-5 cytosine methyltransferase;IPR031303,DNA methylase, C-5 cytosine-specific, conserved site;IPR029063,S-adenosyl-L-methionine-dependent methyltransferase	KOG0919,C-5 cytosine-specific DNA methylase;COG0270,Site-specific DNA methylase	GO:0030488,biological_process,tRNA methylation;GO:0016740,molecular_function,transferase activity;GO:0001975,biological_process,response to amphetamine;GO:0008168,molecular_function,methyltransferase activity;GO:0032259,biological_process,methylation;GO:0008175,molecular_function,tRNA methyltransferase activity	-
HNRNPLP2	2.72247	0.208703	3.57286	1.6117	0.00200946	0.00453871	ENSG00000259917	G3QN86,Heterogeneous nuclear ribonucleoprotein L	-	PF00076,RNA recognition motif. (a.k.a. RRM, RBD, or RNP domain);PF13893,RNA recognition motif. (a.k.a. RRM, RBD, or RNP domain)	IPR034816,hnRNP-L, RNA recognition motif 3;IPR034817,hnRNP-L, RNA recognition motif 4;IPR035005,hnRNP-L, RNA recognition motif 1;IPR012677,Nucleotide-binding alpha-beta plait domain superfamily;IPR000504,RNA recognition motif domain;IPR035979,RNA-binding domain superfamily;IPR035008,hnRNP-L, RNA recognition motif 2;IPR006536,HnRNP-L/PTB	-	GO:0003723,molecular_function,RNA binding;GO:0003676,molecular_function,nucleic acid binding;GO:0006397,biological_process,mRNA processing;GO:0005634,cellular_component,nucleus	-
RP11-20B24.4	3.38155	0.259227	3.57286	1.6117	0.00200946	0.00453871	ENSG00000266642	H2QCJ6,Dehydrogenase/reductase 13	-	PF13561,noyl-(Acyl carrier protein) reductase;PF00106,short chain dehydrogenase	IPR036291,NAD(P)-binding domain superfamily	COG1028,Dehydrogenases with different specificities (related to short-chain alcohol dehydrogenases);KOG1208,Dehydrogenases with different specificities (related to short-chain alcohol dehydrogenases)	-	-
WNT3	0.986221	0.075603	3.57286	1.6117	0.00200946	0.00453871	ENSG00000108379	A0A096P676,Protein Wnt	XP_003913271.1,-	PF00110,wnt family	IPR018161,Wnt protein, conserved site;IPR005817,Wnt;IPR009141,Wnt-3 protein	-	GO:0044339,biological_process,canonical Wnt signaling pathway involved in osteoblast differentiation;GO:0005578,,;GO:0009948,biological_process,anterior/posterior axis specification;GO:0060174,biological_process,limb bud formation;GO:0016055,biological_process,Wnt signaling pathway;GO:0005102,molecular_function,signaling receptor binding;GO:0005109,molecular_function,frizzled binding;GO:0048697,b…	-
ZNF420	1.06246	0.0814475	3.57286	1.6117	0.00200946	0.00453871	ENSG00000197050	G3QF75,Zinc finger protein 420	-	PF00096,Zinc finger, C2H2 type;PF01352,KRAB box	-	-	-	-
CTC-490E21.12	7.43353	0.569849	3.57286	1.6117	0.00200946	0.00453871	ENSG00000268797	M0QY20,Uncharacterized protein	-	-	-	KOG3710,EGL-Nine (EGLN) protein;ENOG410ZHZN,-	-	-
ZNF525	0.593238	0.0454772	3.57286	1.6117	0.00200946	0.00453871	ENSG00000203326	J3KR51,HCG1787564	NP_001335085.1,zinc finger protein 525 isoform 1	PF00096,Zinc finger, C2H2 type;PF01352,KRAB box	IPR013087,Zinc finger C2H2-type;IPR001909,Krueppel-associated box;IPR036051,KRAB domain superfamily;IPR036236,Zinc finger C2H2 superfamily	KOG1721,FOG: Zn-finger;COG5048,FOG: Zn-finger	GO:0006355,biological_process,regulation of transcription, DNA-templated;GO:0003676,molecular_function,nucleic acid binding;GO:0046872,molecular_function,metal ion binding;GO:0005622,cellular_component,intracellular	-
AC073641.2	9.96336	0.763784	3.57286	1.6117	0.00200946	0.00453871	-	-	-	-	-	-	-	-
NSUN3	0.758524	0.0581479	3.57286	1.6117	0.00200946	0.00453871	ENSG00000178694	H2QMZ2,NOP2/Sun domain family, member 3	XP_516606.2,putative methyltransferase NSUN3 isoform X2	PF01189,16S rRNA methyltransferase RsmB/F	IPR001678,SAM-dependent methyltransferase RsmB/NOP2-type;IPR029063,S-adenosyl-L-methionine-dependent methyltransferase;IPR023267,RNA (C5-cytosine) methyltransferase	COG0144,tRNA and rRNA cytosine-C5-methylases;KOG2198,tRNA cytosine-5-methylases and related enzymes of the NOL1/NOP2/sun superfamily	GO:0031167,biological_process,rRNA methylation;GO:0016428,molecular_function,tRNA (cytosine-5-)-methyltransferase activity;GO:0016740,molecular_function,transferase activity;GO:0003723,molecular_function,RNA binding;GO:0032259,biological_process,methylation;GO:0005759,cellular_component,mitochondrial matrix;GO:0008168,molecular_function,methyltransferase activity;GO:0002127,biological_process,tRN…	-
PDE8B	0.615536	0.0471866	3.57286	1.6117	0.00200946	0.00453871	ENSG00000113231	H2PFX7,Phosphodiesterase	-	PF13426,PAS domain;PF00233,3'5'-cyclic nucleotide phosphodiesterase;PF08629,PDE8 phosphodiesterase	IPR000014,PAS domain;IPR023088,3'5'-cyclic nucleotide phosphodiesterase;IPR013938,3'5'-cyclic nucleotide phosphodiesterase PDE8;IPR035965,PAS domain superfamily;IPR002073,3'5'-cyclic nucleotide phosphodiesterase, catalytic domain;IPR003607,HD/PDEase domain;IPR023174,3'5'-cyclic nucleotide phosphodiesterase, conserved site;IPR036971,3'5'-cyclic nucleotide phosphodiesterase, catalytic domain superf…	ENOG410XP9B,-;KOG1229,3'5'-cyclic nucleotide phosphodiesterases	GO:0007165,biological_process,signal transduction;GO:0008081,molecular_function,phosphoric diester hydrolase activity;GO:0004114,molecular_function,3',5'-cyclic-nucleotide phosphodiesterase activity;GO:0016787,molecular_function,hydrolase activity;GO:0046872,molecular_function,metal ion binding	-
PLCG1	0.836821	0.0679236	3.55522	2.38485	6.44e-06	2.56e-05	ENSG00000124181	G3QXU1,Phosphoinositide phospholipase C	XP_018872528.1,-;XP_018872526.1,1-phosphatidylinositol 4,5-bisphosphate phosphodiesterase gamma-1 isoform X3	PF00018,SH3 domain;PF00387,Phosphatidylinositol-specific phospholipase C, Y domain;PF00017,SH2 domain;PF00168,C2 domain;PF00388,Phosphatidylinositol-specific phospholipase C, X domain	IPR018247,EF-Hand 1, calcium-binding site;IPR035024,PLC-gamma, N-terminal SH2 domain;IPR001711,Phospholipase C, phosphatidylinositol-specific, Y domain;IPR036860,SH2 domain superfamily;IPR017946,PLC-like phosphodiesterase, TIM beta/alpha-barrel domain superfamily;IPR000909,Phosphatidylinositol-specific phospholipase C, X domain;IPR035892,C2 domain superfamily;IPR001192,Phosphoinositide phospholip…	-	GO:0006629,biological_process,lipid metabolic process;GO:0004435,molecular_function,phosphatidylinositol phospholipase C activity;GO:0016787,molecular_function,hydrolase activity;GO:0035556,biological_process,intracellular signal transduction;GO:0004871,molecular_function,signal transducer activity;GO:0005509,molecular_function,calcium ion binding;GO:0008081,molecular_function,phosphoric diester …	-
FBXL2	1.51821	0.128261	3.51983	2.85457	2.42e-07	1.3e-06	ENSG00000153558	A0A0D9RAL7,F-box and leucine rich repeat protein 2	-	PF12937,-box-like;PF13516,Leucine Rich repeat	IPR001611,Leucine-rich repeat;IPR006553,Leucine-rich repeat, cysteine-containing subtype;IPR032675,Leucine-rich repeat domain superfamily;IPR001810,F-box domain	-	GO:0019005,cellular_component,SCF ubiquitin ligase complex;GO:0010506,biological_process,regulation of autophagy;GO:0036312,molecular_function,phosphatidylinositol 3-kinase regulatory subunit binding;GO:0006511,biological_process,ubiquitin-dependent protein catabolic process;GO:0016567,biological_process,protein ubiquitination;GO:0019903,molecular_function,protein phosphatase binding;GO:0044830,b…	-
ZNF678	0.878989	0.0735083	3.51233	2.34987	1.06e-05	4e-05	ENSG00000181450	G7NTU9,Uncharacterized protein	-	PF00096,Zinc finger, C2H2 type;PF13912,C2H2-type zinc finger	IPR013087,Zinc finger C2H2-type;IPR036236,Zinc finger C2H2 superfamily	-	GO:0003676,molecular_function,nucleic acid binding	-
JKAMP	1.80142	0.15065	3.51233	2.34987	1.06e-05	4e-05	ENSG00000050130	G3V2M4,Chromosome 14 open reading frame 100, isoform CRA_b	NP_001271130.1,JNK1/MAPK8-associated membrane protein isoform 3	PF05571,Protein of unknown function (DUF766)	IPR008485,JNK1/MAPK8-associated membrane protein	ENOG410XSIG,-;KOG3744,Uncharacterized conserved protein	GO:0006986,biological_process,response to unfolded protein;GO:0016021,cellular_component,integral component of membrane;GO:0016020,cellular_component,membrane	-
PLEKHH1	0.724432	0.0605831	3.51233	2.34987	1.06e-05	4e-05	ENSG00000054690	H2R9A1,Uncharacterized protein	XP_016782432.1,pleckstrin homology domain-containing family H member 1 isoform X2	PF00169,PH domain;PF00373,RM central domain;PF00784,MyTH4 domain	IPR019748,FERM central domain;IPR038185,MyTH4 domain superfamily;IPR000299,FERM domain;IPR001849,Pleckstrin homology domain;IPR011993,PH-like domain superfamily;IPR035963,FERM superfamily, second domain;IPR019749,Band 4.1 domain;IPR014352,FERM/acyl-CoA-binding protein superfamily;IPR000857,MyTH4 domain	KOG0248,Cytoplasmic protein Max-1, contains PH, MyTH4 and FERM domains;ENOG410XPCT,-	GO:0005856,cellular_component,cytoskeleton	-
ZNF438	0.946056	0.0767901	3.49107	1.5499	0.00339444	0.00724177	ENSG00000183621	G3QJN7,Zinc finger protein 438	-	-	IPR013087,Zinc finger C2H2-type;IPR036236,Zinc finger C2H2 superfamily	-	GO:0003676,molecular_function,nucleic acid binding	-
ZNF385C	0.451344	0.036635	3.49107	1.5499	0.00339444	0.00724177	ENSG00000267221	J9NS58,Chromosome 17 open reading frame 113	XP_013972043.1,-;XP_013972042.1,uncharacterized protein LOC111089969	-	-	ENOG410IVCQ,-;ENOG411201C,-	GO:0003677,molecular_function,DNA binding;GO:0000981,molecular_function,RNA polymerase II transcription factor activity, sequence-specific DNA binding;GO:0005737,cellular_component,cytoplasm;GO:0006357,biological_process,regulation of transcription by RNA polymerase II;GO:0007275,biological_process,multicellular organism development;GO:0005654,cellular_component,nucleoplasm	-
ZNF17	1.07305	0.0870982	3.49107	1.5499	0.00339444	0.00724177	ENSG00000186272	G3RPI3,Uncharacterized protein	-	PF00096,Zinc finger, C2H2 type;PF01352,KRAB box	IPR013087,Zinc finger C2H2-type;IPR036236,Zinc finger C2H2 superfamily	-	GO:0003676,molecular_function,nucleic acid binding;GO:0046872,molecular_function,metal ion binding	-
TPRG1	0.423369	0.0343643	3.49107	1.5499	0.00339444	0.00724177	ENSG00000188001	H2QNY4,Tumor protein p63 regulated 1	XP_009445282.1,-;XP_016797982.1,-;XP_009445280.1,-;XP_001159958.1,tumor protein p63-regulated gene 1 protein isoform X1;XP_009445287.1,-	PF12456,Inositol phosphatase	IPR034753,hSac2 domain;IPR022158,Inositol phosphatase	ENOG410IEMY,-;ENOG4110AQ3,-	GO:0005737,cellular_component,cytoplasm	-
GARNL3	0.416382	0.0337972	3.49107	1.5499	0.00339444	0.00724177	ENSG00000136895	G3RAU2,GTPase activating Rap/RanGAP domain like 3	-	PF02145,Rap/ran-GAP;PF00780,CNH domain	IPR035974,Rap/Ran-GAP superfamily;IPR000331,Rap GTPase activating protein domain;IPR001180,Citron homology (CNH) domain	-	GO:0043231,cellular_component,intracellular membrane-bounded organelle;GO:0051056,biological_process,regulation of small GTPase mediated signal transduction;GO:0043547,biological_process,positive regulation of GTPase activity;GO:0005096,molecular_function,GTPase activator activity	-
BEND7	1.16129	0.100152	3.49017	2.82972	9.2e-08	5.44e-07	ENSG00000165626	H2Q1M7,Uncharacterized protein	-	PF10523,BEN domain	IPR018379,BEN domain	ENOG410XQ7C,-;ENOG410IGCJ,-	-	-
THAP7-AS1	3.83129	0.330417	3.49017	2.82972	9.2e-08	5.44e-07	ENSG00000230513	G7N363,Tubulin alpha chain	-	PF03953,Tubulin C-terminal domain;PF00091,Tubulin/FtsZ family, GTPase domain	IPR017975,Tubulin, conserved site;IPR003008,Tubulin/FtsZ, GTPase domain;IPR008280,Tubulin/FtsZ, C-terminal;IPR036525,Tubulin/FtsZ, GTPase domain superfamily;IPR037103,Tubulin/FtsZ, C-terminal domain superfamily;IPR018316,Tubulin/FtsZ, 2-layer sandwich domain;IPR002452,Alpha tubulin;IPR000217,Tubulin;IPR023123,Tubulin, C-terminal	KOG1376,Alpha tubulin;COG5023,Tubulin	GO:0005874,cellular_component,microtubule;GO:0005525,molecular_function,GTP binding;GO:0007010,biological_process,cytoskeleton organization;GO:0007017,biological_process,microtubule-based process;GO:0003924,molecular_function,GTPase activity;GO:0000166,molecular_function,nucleotide binding;GO:0005200,molecular_function,structural constituent of cytoskeleton	-
ZNF195	3.24433	0.286971	3.47163	3.47064	1e-10	1.14e-09	ENSG00000005801	A0A087WT67,Zinc finger protein 195	XP_011518652.1,zinc finger protein 195 isoform X2;XP_016873750.1,-;XP_011518653.1,-	PF00096,Zinc finger, C2H2 type;PF01352,KRAB box;PF13912,C2H2-type zinc finger	IPR013087,Zinc finger C2H2-type;IPR001909,Krueppel-associated box;IPR036051,KRAB domain superfamily;IPR036236,Zinc finger C2H2 superfamily	KOG1721,FOG: Zn-finger;COG5048,FOG: Zn-finger	GO:0006355,biological_process,regulation of transcription, DNA-templated;GO:0003676,molecular_function,nucleic acid binding;GO:0046872,molecular_function,metal ion binding;GO:0005622,cellular_component,intracellular	-
ZHX2	1.61126	0.138958	3.46814	2.31398	1.73e-05	6.27e-05	ENSG00000178764	H2R9P9,Zinc fingers and homeoboxes 2	XP_519932.2,zinc fingers and homeoboxes protein 2;XP_009454125.1,-;XP_009454127.1,-	PF00046,Homeobox domain	IPR013087,Zinc finger C2H2-type;IPR009057,Homeobox-like domain superfamily;IPR001356,Homeobox domain;IPR036236,Zinc finger C2H2 superfamily	ENOG410IHET,-;ENOG410Z8A2,-	GO:0003700,molecular_function,DNA binding transcription factor activity;GO:0003677,molecular_function,DNA binding;GO:0045665,biological_process,negative regulation of neuron differentiation;GO:0003676,molecular_function,nucleic acid binding;GO:0006402,biological_process,mRNA catabolic process;GO:0042803,molecular_function,protein homodimerization activity;GO:0035019,biological_process,somatic ste…	-
GORASP1	1.78399	0.157128	3.45989	2.80442	1.46e-07	8.27e-07	ENSG00000114745	H2QMB8,Golgi reassembly stacking protein 1, 65kDa	XP_001171913.1,-	PF04495,RASP55/65 PDZ-like domain	IPR024958,GRASP55/65 PDZ-like domain;IPR036034,PDZ superfamily;IPR007583,GRASP55/65	COG5233,Peripheral Golgi membrane protein;KOG3834,Golgi reassembly stacking protein GRASP65, contains PDZ domain	GO:0050774,biological_process,negative regulation of dendrite morphogenesis;GO:0006487,biological_process,protein N-linked glycosylation;GO:0007030,biological_process,Golgi organization;GO:0005794,cellular_component,Golgi apparatus	-
ZNF823	2.9936	0.266501	3.42254	2.27712	2.85e-05	9.78e-05	ENSG00000197933	B4DUB6,cDNA FLJ56851, highly similar to Zinc finger protein ZFP-36	-	PF00096,Zinc finger, C2H2 type;PF01352,KRAB box;PF13912,C2H2-type zinc finger	IPR013087,Zinc finger C2H2-type;IPR001909,Krueppel-associated box;IPR036051,KRAB domain superfamily;IPR036236,Zinc finger C2H2 superfamily	KOG1721,FOG: Zn-finger;COG5048,FOG: Zn-finger	GO:0006355,biological_process,regulation of transcription, DNA-templated;GO:0003676,molecular_function,nucleic acid binding;GO:0046872,molecular_function,metal ion binding;GO:0005622,cellular_component,intracellular	-
PHC3	12.4491	1.162	3.41908	6.86294	3.49e-36	1.22e-33	ENSG00000173889	H9ZDR9,Polyhomeotic-like protein 3	XP_001090096.3,-	PF00536,SAM domain (Sterile alpha motif)	IPR038603,FCS-type zinc finger superfamily;IPR012313,Zinc finger, FCS-type;IPR013761,Sterile alpha motif/pointed domain superfamily;IPR001660,Sterile alpha motif domain	ENOG4111F0Y,-;ENOG410IDZN,-	GO:0005634,cellular_component,nucleus;GO:0008270,molecular_function,zinc ion binding	-
R3HDM1	32.1103	3.02854	3.40446	7.12954	5.65e-38	2.11e-35	ENSG00000048991	K7D7G8,R3H domain containing 1	XP_003309310.2,-	PF01424,R3H domain;PF12752,SUZ domain	IPR001374,R3H domain;IPR024771,SUZ domain;IPR036867,R3H domain superfamily	KOG2953,mRNA-binding protein Encore;ENOG410ZICF,-	GO:0003676,molecular_function,nucleic acid binding	-
NCR3LG1	0.590146	0.0508952	3.40437	1.48518	0.00572059	0.011567	ENSG00000188211	H2R5K0,Uncharacterized protein	-	PF07654,Immunoglobulin C1-set domain;PF01140,Matrix protein (MA), p15	IPR003006,Immunoglobulin/major histocompatibility complex, conserved site;IPR000840,Gamma-retroviral matrix protein;IPR036946,Gamma-retroviral matrix domain superfamily;IPR036179,Immunoglobulin-like domain superfamily;IPR013783,Immunoglobulin-like fold;IPR010999,Retroviral matrix protein;IPR003599,Immunoglobulin subtype;IPR003597,Immunoglobulin C1-set;IPR007110,Immunoglobulin-like domain	ENOG4110NPT,-;ENOG410IKZM,-	GO:0005198,molecular_function,structural molecule activity;GO:0016021,cellular_component,integral component of membrane;GO:0016020,cellular_component,membrane	-
CTD-2020K17.3	1.65694	0.142897	3.40437	1.48518	0.00572059	0.011567	ENSG00000233175	G3QPF1,Formin like 1	-	PF02181,ormin Homology 2 Domain;PF06367,iaphanous FH3 Domain;PF06371,iaphanous GTPase-binding Domain	IPR027657,Formin-like protein 1;IPR014767,Diaphanous autoregulatory (DAD) domain;IPR015425,Formin, FH2 domain	-	GO:0007010,biological_process,cytoskeleton organization;GO:0008360,biological_process,regulation of cell shape	-
FHOD3	0.477007	0.0411379	3.40437	1.48518	0.00572059	0.011567	ENSG00000134775	A0A1D5RJJ5,Formin homology 2 domain containing 3	XP_014977210.1,FH1/FH2 domain-containing protein 3 isoform X2	-	IPR014768,Rho GTPase-binding/formin homology 3 (GBD/FH3) domain;IPR027651,FH1/FH2 domain-containing protein 3;IPR011989,Armadillo-like helical;IPR016024,Armadillo-type fold;IPR014767,Diaphanous autoregulatory (DAD) domain;IPR015425,Formin, FH2 domain	-	GO:0007015,biological_process,actin filament organization	-
RP5-965G21.4	1.62714	0.140327	3.40437	1.48518	0.00572059	0.011567	ENSG00000274414	Q96LS9,cDNA FLJ25101 fis, clone CBR01328	-	-	-	-	-	-
COL6A1	0.711092	0.0613257	3.40437	1.48518	0.00572059	0.011567	ENSG00000142156	A0A087X0S5,Collagen alpha-1	-	PF00092,von Willebrand factor type A domain;PF01391,Collagen triple helix repeat (20 copies)	IPR008160,Collagen triple helix repeat;IPR002035,von Willebrand factor, type A;IPR036465,von Willebrand factor A-like domain superfamily	ENOG410ZQTS,-;KOG3544,Collagens (type IV and type XIII), and related proteins	-	-
KDELR3	1.9696	0.169862	3.40437	1.48518	0.00572059	0.011567	ENSG00000100196	K7CX71,ER lumen protein-retaining receptor	XP_009436675.1,-	PF00810,R lumen protein retaining receptor	IPR000133,ER lumen protein retaining receptor	KOG3106,ER lumen protein retaining receptor;COG5196,ER lumen protein retaining receptor	GO:0046923,molecular_function,ER retention sequence binding;GO:0015031,biological_process,protein transport;GO:0005783,cellular_component,endoplasmic reticulum;GO:0016021,cellular_component,integral component of membrane;GO:0016020,cellular_component,membrane;GO:0005789,cellular_component,endoplasmic reticulum membrane;GO:0006621,biological_process,protein retention in ER lumen	-
CTC-203F4.2	1.88367	0.162451	3.40437	1.48518	0.00572059	0.011567	-	-	-	-	-	-	-	-
DXO	1.53015	0.131963	3.40437	1.48518	0.00572059	0.011567	ENSG00000204348	A0A024RCW8,DXO	NP_005501.2,decapping and exoribonuclease protein;XP_006715068.1,-	PF08652,RAI1 like PD-(D/E)XK nuclease	IPR013961,RAI1-like	KOG1982,Nuclear 5'-3' exoribonuclease-interacting protein, Rai1p;ENOG410ZAFR,-	GO:0005829,cellular_component,cytosol;GO:0005886,cellular_component,plasma membrane;GO:0005634,cellular_component,nucleus	-
SIM1	0.409679	0.0353314	3.40437	1.48518	0.00572059	0.011567	ENSG00000112246	G3RLN9,Single-minded family bHLH transcription factor 1	XP_004044499.1,-	PF08447,PAS fold;PF00010,Helix-loop-helix DNA-binding domain;PF00989,PAS fold;PF06621,Single-minded protein C-terminus	IPR000014,PAS domain;IPR010578,Single-minded, C-terminal;IPR011598,Myc-type, basic helix-loop-helix (bHLH) domain;IPR035965,PAS domain superfamily;IPR013655,PAS fold-3;IPR036638,Helix-loop-helix DNA-binding domain superfamily;IPR013767,PAS fold;IPR001610,PAC motif	-	GO:0046983,molecular_function,protein dimerization activity;GO:0003677,molecular_function,DNA binding;GO:0003700,molecular_function,DNA binding transcription factor activity;GO:0006355,biological_process,regulation of transcription, DNA-templated;GO:0006351,biological_process,transcription, DNA-templated;GO:0005634,cellular_component,nucleus	-
RP11-69I8.3	7.67548	0.661946	3.40437	1.48518	0.00572059	0.011567	ENSG00000227220	A0A1D5QFX7,Connective tissue growth factor	-	-	IPR012395,IGFBP-related, CNN;IPR000867,Insulin-like growth factor-binding protein, IGFBP;IPR000884,Thrombospondin type-1 (TSP1) repeat;IPR009030,Growth factor receptor cysteine-rich domain superfamily;IPR006207,Cystine knot, C-terminal;IPR001007,VWFC domain;IPR006208,Glycoprotein hormone subunit beta;IPR036383,Thrombospondin type-1 (TSP1) repeat superfamily	-	GO:0001558,biological_process,regulation of cell growth;GO:0005520,molecular_function,insulin-like growth factor binding;GO:0005576,cellular_component,extracellular region	-
RP11-9M16.2	21.9616	1.89401	3.40437	1.48518	0.00572059	0.011567	-	-	-	-	-	-	-	-
FAM160B1	3.39993	0.316277	3.40355	3.65249	3.03e-11	3.92e-10	ENSG00000151553	H2Q2L9,Family with sequence similarity 160 member B1	XP_016774918.1,protein FAM160B1 isoform X2	PF10257,Retinoic acid induced 16-like protein	IPR019384,Retinoic acid induced 16-like protein	ENOG410IN31,-;ENOG410XTDG,-	-	-
RP11-809N8.4	20.7087	1.90502	3.37546	2.23926	4.68e-05	0.000153043	-	-	-	-	-	-	-	-
ENOX1	2.29726	0.211328	3.37546	2.23926	4.68e-05	0.000153043	ENSG00000120658	H2Q7I0,Ecto-NOX disulfide-thiol exchanger 1	XP_001153157.1,-;XP_016780754.1,-;XP_003954301.1,-;XP_016780752.1,-;XP_009438847.1,-	PF00076,RNA recognition motif. (a.k.a. RRM, RBD, or RNP domain)	IPR000504,RNA recognition motif domain;IPR012677,Nucleotide-binding alpha-beta plait domain superfamily;IPR035979,RNA-binding domain superfamily;IPR034140,Ecto-NOX disulfide-thiol exchanger, RNA recognition motif	ENOG410IEVY,-;ENOG410XVWG,-	GO:0003723,molecular_function,RNA binding;GO:0003676,molecular_function,nucleic acid binding;GO:0005886,cellular_component,plasma membrane	-
RP11-166B2.1	2.62001	0.241018	3.37546	2.23926	4.68e-05	0.000153043	ENSG00000234719	A0A0A6YYH2,Uncharacterized protein	-	PF06409,Nuclear pore complex interacting protein (NPIP)	IPR009443,Nuclear pore complex interacting protein	COG5069,Ca2+-binding actin-bundling protein fimbrin/plastin (EF-Hand superfamily);ENOG410J0WZ,-	GO:0005654,cellular_component,nucleoplasm	-
RP11-927P21.5	14.4793	1.33197	3.37546	2.23926	4.68e-05	0.000153043	ENSG00000263647	K9J6E0,Putative nucleosome remodeling factor subunit	-	PF15612,WSTF, HB1, Itc1p, MBD9 motif 1;PF00439,Bromodomain;PF00628,PHD-finger;PF02791,T domain;PF15613,Williams-Beuren syndrome DDT (WSD), D-TOX E motif	IPR028941,WHIM2 domain;IPR001965,Zinc finger, PHD-type;IPR011011,Zinc finger, FYVE/PHD-type;IPR028942,WHIM1 domain;IPR038028,Nucleosome-remodeling factor subunit BPTF;IPR013083,Zinc finger, RING/FYVE/PHD-type;IPR018501,DDT domain;IPR036427,Bromodomain-like superfamily;IPR001487,Bromodomain;IPR019787,Zinc finger, PHD-finger;IPR018359,Bromodomain, conserved site;IPR019786,Zinc finger, PHD-type, con…	-	GO:0035064,molecular_function,methylated histone binding;GO:0016589,cellular_component,NURF complex;GO:0046872,molecular_function,metal ion binding	-
ZNF354B	1.89968	0.174754	3.37546	2.23926	4.68e-05	0.000153043	ENSG00000178338	A0A1S5UZ15,Zinc finger protein 354B	-	-	IPR013087,Zinc finger C2H2-type;IPR001909,Krueppel-associated box;IPR036051,KRAB domain superfamily;IPR036236,Zinc finger C2H2 superfamily	-	GO:0006355,biological_process,regulation of transcription, DNA-templated;GO:0003676,molecular_function,nucleic acid binding;GO:0046872,molecular_function,metal ion binding;GO:0005622,cellular_component,intracellular	-
ZNF614	1.79739	0.169102	3.36503	2.72561	3.71e-07	1.9e-06	ENSG00000142556	H2RDI2,Uncharacterized protein	XP_001174401.1,zinc finger protein 614	PF00096,Zinc finger, C2H2 type;PF01352,KRAB box	IPR013087,Zinc finger C2H2-type;IPR001909,Krueppel-associated box;IPR036051,KRAB domain superfamily;IPR036236,Zinc finger C2H2 superfamily	KOG1721,FOG: Zn-finger;COG5048,FOG: Zn-finger	GO:0006355,biological_process,regulation of transcription, DNA-templated;GO:0003676,molecular_function,nucleic acid binding;GO:0046872,molecular_function,metal ion binding;GO:0005622,cellular_component,intracellular	-
KLF11	2.22506	0.214206	3.33198	2.6983	5.91e-07	2.94e-06	ENSG00000172059	Q53QU8,Uncharacterized protein TIEG2	NP_003588.1,Krueppel-like factor 11 isoform a	PF00096,Zinc finger, C2H2 type	IPR013087,Zinc finger C2H2-type;IPR036236,Zinc finger C2H2 superfamily	KOG1721,FOG: Zn-finger;COG5048,FOG: Zn-finger	GO:0005925,cellular_component,focal adhesion;GO:0003700,molecular_function,DNA binding transcription factor activity;GO:1901653,biological_process,cellular response to peptide;GO:0045892,biological_process,negative regulation of transcription, DNA-templated;GO:0003676,molecular_function,nucleic acid binding;GO:0005829,cellular_component,cytosol;GO:0016604,cellular_component,nuclear body;GO:000565…	-
LDOC1	38.3444	3.79625	3.32787	4.91878	4.81e-20	3.93e-18	ENSG00000182195	F7IBR8,Uncharacterized protein	XP_008988228.1,-	PF16297,omain of unknown function (DUF4939)	IPR032567,LDOC1-related;IPR032549,Domain of unknown function DUF4939	ENOG410Y6K0,-;ENOG410J3P7,-	-	-
LA16c-407A10.3	4.77555	0.454457	3.32679	2.20032	7.68e-05	0.00023831	ENSG00000282907	E7ERP4,Phosphatidylinositol N-acetylglucosaminyltransferase subunit Q	-	PF05024,N-acetylglucosaminyl transferase component (Gpi1)	IPR007720,N-acetylglucosaminyl transferase component	ENOG410XSXI,-;KOG1183,N-acetylglucosaminyltransferase complex, subunit PIG-Q/GPI1, required for phosphatidylinositol biosynthesis	GO:0017176,molecular_function,phosphatidylinositol N-acetylglucosaminyltransferase activity;GO:0006506,biological_process,GPI anchor biosynthetic process;GO:0016021,cellular_component,integral component of membrane;GO:0016020,cellular_component,membrane	-
SP9	2.6963	0.256588	3.32679	2.20032	7.68e-05	0.00023831	ENSG00000217236	H0XXC7,Sp9 transcription factor	XP_003791555.1,transcription factor Sp9	PF00096,Zinc finger, C2H2 type	IPR013087,Zinc finger C2H2-type;IPR036236,Zinc finger C2H2 superfamily	KOG1721,FOG: Zn-finger;COG5048,FOG: Zn-finger	GO:0003676,molecular_function,nucleic acid binding;GO:0030326,biological_process,embryonic limb morphogenesis	-
NPIPB5	3.9636	0.393	3.32289	4.51783	5.47e-17	2.55e-15	ENSG00000243716	E9PKP1,Nuclear pore complex-interacting protein family member B5	-	PF06409,Nuclear pore complex interacting protein (NPIP)	IPR009443,Nuclear pore complex interacting protein	COG5069,Ca2+-binding actin-bundling protein fimbrin/plastin (EF-Hand superfamily);ENOG410J0WZ,-	GO:0005654,cellular_component,nucleoplasm	-
SIMC1	3.00257	0.295939	3.31581	3.33768	1.66e-09	1.45e-08	ENSG00000170085	F6R0L0,SUMO-interacting motif-containing protein 1	NP_001295124.1,SUMO-interacting motif-containing protein 1 isoform a	-	-	ENOG410IH7J,-;ENOG410XQXC,-	-	-
DYNC1I2P1	1.93792	0.178272	3.31213	1.41726	0.00961124	0.0184048	ENSG00000225137	K9K3Q9,Cytoplasmic dynein 1 intermediate chain-like protein	-	PF00400,WD domain, G-beta repeat	IPR036322,WD40-repeat-containing domain superfamily;IPR015943,WD40/YVTN repeat-like-containing domain superfamily;IPR001680,WD40 repeat;IPR017986,WD40-repeat-containing domain	ENOG410XQ99,-;KOG1587,Cytoplasmic dynein intermediate chain	-	-
RP11-493P1.2	7.10959	0.654019	3.31213	1.41726	0.00961124	0.0184048	ENSG00000258034	F1RKE1,Mediator of RNA polymerase II transcription subunit 13	-	PF06333,Mediator complex subunit 13 C-terminal	IPR021643,Mediator complex, subunit Med13, N-terminal, metazoa/fungi;IPR009401,Mediator complex, subunit Med13	KOG3600,Thyroid hormone receptor-associated protein complex, subunit TRAP240;ENOG410XPV2,-	GO:0006357,biological_process,regulation of transcription by RNA polymerase II;GO:0006355,biological_process,regulation of transcription, DNA-templated;GO:0006351,biological_process,transcription, DNA-templated;GO:0016592,cellular_component,mediator complex;GO:0001104,molecular_function,RNA polymerase II transcription cofactor activity;GO:0005634,cellular_component,nucleus	-
RP11-240G22.5	1.32659	0.122035	3.31213	1.41726	0.00961124	0.0184048	ENSG00000274554	S7MPM1,F-box/WD repeat-containing protein 8	-	PF12937,-box-like	IPR019775,WD40 repeat, conserved site;IPR017986,WD40-repeat-containing domain;IPR036322,WD40-repeat-containing domain superfamily;IPR015943,WD40/YVTN repeat-like-containing domain superfamily;IPR001680,WD40 repeat;IPR036047,F-box-like domain superfamily;IPR001810,F-box domain	-	-	-
FARP1-AS1	11.0276	1.01444	3.31213	1.41726	0.00961124	0.0184048	ENSG00000231194	A0A1D5Q2P2,FERM, ARH/RhoGEF and pleckstrin domain protein 1	-	-	IPR000219,Dbl homology (DH) domain;IPR035899,Dbl homology (DH) domain superfamily	-	GO:0005089,molecular_function,Rho guanyl-nucleotide exchange factor activity;GO:0035023,biological_process,regulation of Rho protein signal transduction;GO:0065009,biological_process,regulation of molecular function	-
RP11-303E16.2	4.97472	0.457631	3.31213	1.41726	0.00961124	0.0184048	ENSG00000261061	G7NQ99,Uncharacterized protein	-	-	-	-	-	-
AC142472.6	2.04589	0.188204	3.31213	1.41726	0.00961124	0.0184048	-	-	-	-	-	-	-	-
SMAD7	0.964762	0.0887496	3.31213	1.41726	0.00961124	0.0184048	ENSG00000101665	H2QEI2,Mothers against decapentaplegic homolog	-	PF03165,MH1 domain;PF03166,MH2 domain	IPR003619,MAD homology 1, Dwarfin-type;IPR001132,SMAD domain, Dwarfin-type;IPR013790,Dwarfin;IPR017855,SMAD-like domain superfamily;IPR008984,SMAD/FHA domain superfamily;IPR036578,SMAD MH1 domain superfamily;IPR013019,MAD homology, MH1	ENOG410XQKU,-;KOG3701,TGFbeta receptor signaling protein SMAD and related proteins	GO:0031397,biological_process,negative regulation of protein ubiquitination;GO:0034629,biological_process,cellular protein-containing complex localization;GO:0060389,biological_process,pathway-restricted SMAD protein phosphorylation;GO:0033137,biological_process,negative regulation of peptidyl-serine phosphorylation;GO:0007179,biological_process,transforming growth factor beta receptor signaling …	-	`
VMAC	1.58026	0.14537	3.31213	1.41726	0.00961124	0.0184048	ENSG00000187650	H2NX67,Vimentin type intermediate filament associated coiled-coil protein	XP_009250935.1,-	-	-	ENOG410IWFQ,-;ENOG4111J8G,-	-	-
CCDC134	2.80465	0.258003	3.31213	1.41726	0.00961124	0.0184048	ENSG00000100147	G3SFZ7,Coiled-coil domain containing 134	XP_004063595.1,coiled-coil domain-containing protein 134;XP_018874009.1,-	PF15002,RK and JNK pathways, inhibitor	IPR026321,Coiled-coil domain-containing protein 134	-	-	-
CDHR2	0.666025	0.0612684	3.31213	1.41726	0.00961124	0.0184048	ENSG00000074276	A0A096NAL5,Cadherin related family member 2	-	PF00028,Cadherin domain	IPR020894,Cadherin conserved site;IPR002126,Cadherin;IPR015919,Cadherin-like	-	GO:0007155,biological_process,cell adhesion;GO:0007156,biological_process,homophilic cell adhesion via plasma membrane adhesion molecules;GO:0005509,molecular_function,calcium ion binding;GO:0005886,cellular_component,plasma membrane;GO:0016020,cellular_component,membrane;GO:0016021,cellular_component,integral component of membrane	-
ST3GAL6	1.58609	0.156328	3.29814	2.67045	9.44e-07	4.47e-06	ENSG00000064225	A0A087WXB8,ST3 beta-galactoside alpha-2,3-sialyltransferase 6, isoform CRA_b	NP_001258074.1,type 2 lactosamine alpha-2,3-sialyltransferase isoform 3	PF00777,lycosyltransferase family 29 (sialyltransferase)	IPR012163,Sialyltransferase;IPR038578,GT29-like superfamiliy;IPR001675,Glycosyl transferase family 29	KOG2692,Sialyltransferase;ENOG410XT8P,-	GO:0005794,cellular_component,Golgi apparatus;GO:0097503,biological_process,sialylation;GO:0006486,biological_process,protein glycosylation;GO:0016757,molecular_function,transferase activity, transferring glycosyl groups;GO:0016740,molecular_function,transferase activity;GO:0016020,cellular_component,membrane;GO:0008373,molecular_function,sialyltransferase activity;GO:0016021,cellular_component,i…	-
AC004980.7	3.20686	0.316074	3.29814	2.67045	9.44e-07	4.47e-06	ENSG00000205485	G1RBE6,Uncharacterized protein	-	PF15229,POM121 family	IPR026090,Nuclear pore protein POM121;IPR026054,Nuclear pore complex protein	ENOG410IM0V,-;ENOG4112BJY,-	GO:0016021,cellular_component,integral component of membrane;GO:0016020,cellular_component,membrane	-
UCA1	207.92	21.2361	3.29052	8.04811	3.98e-41	1.64e-38	ENSG00000273782	Q2VCE5,UCA1 protein	-	-	-	-	-	-
RP5-1050D4.2	15.1455	1.49277	3.27642	2.16025	7.68e-05	0.00023831	ENSG00000234203	G3RRE7,Calmodulin binding transcription activator 2	XP_018868655.1,calmodulin-binding transcription activator 2 isoform X3	PF03859,CG-1 domain;PF01833,IPT/TIG domain	IPR027417,P-loop containing nucleoside triphosphate hydrolase;IPR036770,Ankyrin repeat-containing domain superfamily;IPR014756,Immunoglobulin E-set;IPR020683,Ankyrin repeat-containing domain;IPR005559,CG-1 DNA-binding domain;IPR013783,Immunoglobulin-like fold;IPR000048,IQ motif, EF-hand binding site;IPR002909,IPT domain	-	GO:0003677,molecular_function,DNA binding;GO:0005634,cellular_component,nucleus	-
RP11-35G9.3	2.77384	0.273395	3.27642	2.16025	7.68e-05	0.00023831	ENSG00000267040	G7MJ96,Uncharacterized protein	-	-	-	-	-	-
RP11-420L9.5	2.40814	0.237351	3.27642	2.16025	7.68e-05	0.00023831	ENSG00000270504	H2PHS7,Uncharacterized protein	-	-	IPR036871,PX domain superfamily	ENOG410IEEQ,-;ENOG411016X,-	GO:0035091,molecular_function,phosphatidylinositol binding	-
EPB41L4B	5.12352	0.54063	3.23404	4.54996	2.91e-16	1.17e-14	ENSG00000095203	A0A0D9RGR0,Erythrocyte membrane protein band 4.1 like 4B	XP_007966664.1,band 4.1-like protein 4B isoform X1	PF09379,RM N-terminal domain;PF00373,RM central domain;PF08736,RM adjacent (FA);PF09380,RM C-terminal PH-like domain	IPR019748,FERM central domain;IPR014847,FERM adjacent (FA);IPR030698,Band 4.1-like protein 4B;IPR035963,FERM superfamily, second domain;IPR018980,FERM, C-terminal PH-like domain;IPR000299,FERM domain;IPR019747,FERM conserved site;IPR011993,PH-like domain superfamily;IPR018979,FERM, N-terminal;IPR019749,Band 4.1 domain;IPR014352,FERM/acyl-CoA-binding protein superfamily;IPR000798,Ezrin/radixin/moe…	-	GO:0042060,biological_process,wound healing;GO:0010628,biological_process,positive regulation of gene expression;GO:0005737,cellular_component,cytoplasm;GO:0008092,molecular_function,cytoskeletal protein binding;GO:0051549,biological_process,positive regulation of keratinocyte migration;GO:0045785,biological_process,positive regulation of cell adhesion;GO:0005856,cellular_component,cytoskeleton;G…	-
RP4-761J14.8	12.9668	1.36583	3.23348	4.1912	5.77e-14	1.38e-12	ENSG00000219410	O15420,CAGH1 alternate open reading frame	-	-	-	-	GO:0007399,biological_process,nervous system development;GO:0016021,cellular_component,integral component of membrane;GO:0016020,cellular_component,membrane	-
ZNF708	3.62367	0.378802	3.23111	3.26612	5.63e-09	4.37e-08	ENSG00000182141	G3QPG8,Zinc finger protein 708	-	PF00096,Zinc finger, C2H2 type;PF01352,KRAB box	IPR013087,Zinc finger C2H2-type;IPR001909,Krueppel-associated box;IPR036051,KRAB domain superfamily;IPR036236,Zinc finger C2H2 superfamily	-	GO:0006355,biological_process,regulation of transcription, DNA-templated;GO:0003676,molecular_function,nucleic acid binding;GO:0046872,molecular_function,metal ion binding;GO:0005622,cellular_component,intracellular	-
TRIB1	3.78743	0.39592	3.23111	3.26612	5.63e-09	4.37e-08	ENSG00000173334	G3QRE4,Tribbles pseudokinase 1	XP_004047569.1,tribbles homolog 1	PF00069,Protein kinase domain	IPR011009,Protein kinase-like domain superfamily;IPR024105,Tribbles homologue 1;IPR024104,Pseudokinase tribbles family/serine-threonine-protein kinase 40;IPR000719,Protein kinase domain	-	GO:0006469,biological_process,negative regulation of protein kinase activity;GO:0045659,biological_process,negative regulation of neutrophil differentiation;GO:0048662,biological_process,negative regulation of smooth muscle cell proliferation;GO:0014912,biological_process,negative regulation of smooth muscle cell migration;GO:0008134,molecular_function,transcription factor binding;GO:0004672,mole…	-
ZNF700	2.86183	0.296171	3.228	2.613	2.41e-06	1.05e-05	ENSG00000196757	A0A087WVH9,Zinc finger protein 700	NP_001258777.1,zinc finger protein 700 isoform 2	PF00096,Zinc finger, C2H2 type;PF13894,C2H2-type zinc finger;PF01352,KRAB box;PF13912,C2H2-type zinc finger;PF12874,Zinc-finger of C2H2 type	IPR013087,Zinc finger C2H2-type;IPR001909,Krueppel-associated box;IPR036051,KRAB domain superfamily;IPR036236,Zinc finger C2H2 superfamily	KOG1721,FOG: Zn-finger;COG5048,FOG: Zn-finger	GO:0006355,biological_process,regulation of transcription, DNA-templated;GO:0003676,molecular_function,nucleic acid binding;GO:0046872,molecular_function,metal ion binding;GO:0005622,cellular_component,intracellular	-
ZNF566	1.46558	0.151673	3.228	2.613	2.41e-06	1.05e-05	ENSG00000186017	Q8N2S2,cDNA FLJ90016 fis, clone HEMBA1000671, weakly similar to ZINC FINGER PROTEIN 184	-	PF00096,Zinc finger, C2H2 type;PF01352,KRAB box	IPR013087,Zinc finger C2H2-type;IPR001909,Krueppel-associated box;IPR036051,KRAB domain superfamily;IPR036236,Zinc finger C2H2 superfamily	KOG1721,FOG: Zn-finger;COG5048,FOG: Zn-finger	GO:0006355,biological_process,regulation of transcription, DNA-templated;GO:0003676,molecular_function,nucleic acid binding;GO:0046872,molecular_function,metal ion binding;GO:0005622,cellular_component,intracellular	-
SPRR1A	23.746	2.42714	3.22423	2.11897	0.000126105	0.000373122	-	-	-	-	-	-	-	-
RP3-523K23.2	3.31683	0.339021	3.22423	2.11897	0.000126105	0.000373122	-	-	-	-	-	-	-	-
RP1-317E23.3	1.19028	0.117316	3.21358	1.34582	0.0160841	0.0291487	ENSG00000228172	Q96DR3,cDNA FLJ30206 fis, clone BRACE2001508, weakly similar to PROTEIN-LYSINE 6-OXIDASE	-	-	IPR000048,IQ motif, EF-hand binding site	ENOG410KHPX,-;ENOG4110R26,-	GO:0055114,biological_process,oxidation-reduction process;GO:0004720,molecular_function,protein-lysine 6-oxidase activity	-
RP11-618K13.2	8.12822	0.801133	3.21358	1.34582	0.0160841	0.0291487	-	-	-	-	-	-	-	-
RP11-521B24.3	1.45873	0.143775	3.21358	1.34582	0.0160841	0.0291487	ENSG00000251602	G7PXF9,Uncharacterized protein	-	-	-	-	-	-
PYGO1	0.386833	0.038127	3.21358	1.34582	0.0160841	0.0291487	ENSG00000171016	F6Y6Y6,Pygopus family PHD finger 1	-	PF00628,PHD-finger	IPR001965,Zinc finger, PHD-type;IPR011011,Zinc finger, FYVE/PHD-type;IPR019786,Zinc finger, PHD-type, conserved site;IPR013083,Zinc finger, RING/FYVE/PHD-type;IPR019787,Zinc finger, PHD-finger	ENOG4111FFC,-;ENOG410IDYF,-	GO:0046872,molecular_function,metal ion binding	-
RP11-667K14.3	7.50438	0.739647	3.21358	1.34582	0.0160841	0.0291487	-	-	-	-	-	-	-	-
TEPSIN	0.698119	0.0688079	3.21358	1.34582	0.0160841	0.0291487	ENSG00000167302	A0A1B0GV70,AP-4 complex accessory subunit Tepsin	XP_005257124.1,AP-4 complex accessory subunit tepsin isoform X7	PF01417,NTH domain	IPR013809,ENTH domain;IPR035802,Tepsin, ENTH/VHS domain;IPR008942,ENTH/VHS	-	GO:0031965,cellular_component,nuclear membrane;GO:0005794,cellular_component,Golgi apparatus;GO:0016607,cellular_component,nuclear speck	-
AC006262.6	0.562416	0.0554328	3.21358	1.34582	0.0160841	0.0291487	ENSG00000268460	H2NZB0,Uncharacterized protein	-	-	-	-	-	-
MACROD2	0.293057	0.0288843	3.21358	1.34582	0.0160841	0.0291487	ENSG00000172264	H2QJZ6,MACRO domain containing 2	XP_001136712.2,O-acetyl-ADP-ribose deacetylase MACROD2	PF01661,Macro domain	IPR002589,Macro domain	COG2110,Predicted phosphatase homologous to the C-terminal domain of histone macroH2A1;KOG2633,Hismacro and SEC14 domain-containing proteins	GO:0016798,molecular_function,hydrolase activity, acting on glycosyl bonds;GO:0005730,cellular_component,nucleolus;GO:0042278,biological_process,purine nucleoside metabolic process;GO:0006974,biological_process,cellular response to DNA damage stimulus;GO:0005634,cellular_component,nucleus;GO:0051725,biological_process,protein de-ADP-ribosylation;GO:0005813,cellular_component,centrosome;GO:0007420…	-
DGCR5	0.528444	0.0520845	3.21358	1.34582	0.0160841	0.0291487	ENSG00000283406	Q9BYB2,KIAA1647 protein	-	-	-	-	-	-
CTC-205M6.1	3.3785	0.332991	3.21358	1.34582	0.0160841	0.0291487	-	-	-	-	-	-	-	-
RP11-298A10.1	0.892947	0.0880106	3.21358	1.34582	0.0160841	0.0291487	ENSG00000283528	G3S297,Uncharacterized protein	XP_018887359.1,TRPM8 channel-associated factor 2 isoform X2	PF17291,N-terminal domain of M60-like peptidases;PF13402,Peptidase M60, enhancin and enhancin-like	IPR031161,Peptidase family M60 domain;IPR035423,M60-like domain, N-terminal;IPR029062,Class I glutamine amidotransferase-like	-	-	-
AF131216.6	0.567698	0.0559535	3.21358	1.34582	0.0160841	0.0291487	ENSG00000246477	A0A0D9RWG6,Myotubularin related protein 9	XP_007959847.1,-	PF06602,Myotubularin-like phosphatase domain	IPR030564,Myotubularin family;IPR029021,Protein-tyrosine phosphatase-like;IPR011993,PH-like domain superfamily;IPR010569,Myotubularin-like phosphatase domain	-	GO:0050821,biological_process,protein stabilization;GO:0060304,biological_process,regulation of phosphatidylinositol dephosphorylation;GO:0010922,biological_process,positive regulation of phosphatase activity;GO:0032991,cellular_component,protein-containing complex;GO:0005737,cellular_component,cytoplasm;GO:0030234,molecular_function,enzyme regulator activity;GO:0019903,molecular_function,protein…	-
CA5BP1	1.38001	0.136016	3.21358	1.34582	0.0160841	0.0291487	ENSG00000186312	G3QHC3,Uncharacterized protein	-	PF00194,ukaryotic-type carbonic anhydrase	-	-	-	-
FOCAD	1.53795	0.163244	3.20913	3.24763	8.46e-09	6.32e-08	ENSG00000188352	H2QX20,Uncharacterized protein	XP_009454651.1,focadhesin isoform X3;XP_016816167.1,-;XP_016816166.1,-	PF11229,ocadhesin;PF12530,Protein of unknown function (DUF3730)	IPR021392,Focadhesin;IPR016024,Armadillo-type fold;IPR022542,Domain of unknown function DUF3730	ENOG410YIIU,-;ENOG410II1D,-	GO:0005925,cellular_component,focal adhesion	-
VLDLR	1.32219	0.140342	3.20253	2.95446	3.66e-07	1.89e-06	ENSG00000147852	G3QG94,Very low density lipoprotein receptor	XP_004047800.1,very low-density lipoprotein receptor isoform X1	PF14670,Coagulation Factor Xa inhibitory site;PF07645,Calcium-binding EGF domain;PF00057,Low-density lipoprotein receptor domain class A;PF00058,Low-density lipoprotein receptor repeat class B	IPR023415,Low-density lipoprotein (LDL) receptor class A, conserved site;IPR018097,EGF-like calcium-binding, conserved site;IPR000033,LDLR class B repeat;IPR002172,Low-density lipoprotein (LDL) receptor class A repeat;IPR032931,Very low-density lipoprotein receptor;IPR011042,Six-bladed beta-propeller, TolB-like;IPR001881,EGF-like calcium-binding domain;IPR000152,EGF-type aspartate/asparagine hydr…	-	GO:0006898,biological_process,receptor-mediated endocytosis;GO:1900006,biological_process,positive regulation of dendrite development;GO:0034437,molecular_function,glycoprotein transporter activity;GO:0038025,molecular_function,reelin receptor activity;GO:0034436,biological_process,glycoprotein transport;GO:0048813,biological_process,dendrite morphogenesis;GO:0005615,cellular_component,extracellu…	-
FAM86JP	8.48409	0.910538	3.2008	3.68351	1.04e-10	1.18e-09	ENSG00000171084	G3RVZ4,Uncharacterized protein	-	PF14904,amily of unknown function	IPR029426,FAM86	-	-	-
RP3-430N8.11	33.488	3.6007	3.19497	3.47442	5.59e-10	5.48e-09	-	-	-	-	-	-	-	-
SMN2	3.08801	0.327773	3.19161	2.58335	3.85e-06	1.61e-05	ENSG00000205571	E7EQZ4,Survival motor neuron protein	XP_011541901.1,-;XP_011541898.1,survival motor neuron protein isoform X1	PF06003,Survival motor neuron protein (SMN)	IPR002999,Tudor domain;IPR010304,Survival motor neuron	KOG4327,mRNA splicing protein SMN (survival motor neuron);ENOG4111ME8,-	GO:0003723,molecular_function,RNA binding;GO:0005737,cellular_component,cytoplasm;GO:0005634,cellular_component,nucleus;GO:0006397,biological_process,mRNA processing	-
ZNF714	1.89188	0.203948	3.18681	3.22891	1.27e-08	9.18e-08	ENSG00000160352	A0A087WU35,Zinc finger protein 714	NP_872321.2,zinc finger protein 714	PF00096,Zinc finger, C2H2 type	IPR013087,Zinc finger C2H2-type;IPR001909,Krueppel-associated box;IPR036236,Zinc finger C2H2 superfamily	KOG1721,FOG: Zn-finger;COG5048,FOG: Zn-finger	GO:0006355,biological_process,regulation of transcription, DNA-templated;GO:0003676,molecular_function,nucleic acid binding;GO:0046872,molecular_function,metal ion binding;GO:0005622,cellular_component,intracellular	-
ZBTB49	2.13706	0.226835	3.17008	2.07641	0.000206996	0.000585857	ENSG00000168826	H2QP57,Zinc finger and BTB domain containing 49	XP_001154268.1,zinc finger and BTB domain-containing protein 49 isoform X1;XP_009445571.1,-	PF00096,Zinc finger, C2H2 type;PF13912,C2H2-type zinc finger;PF00651,BTB/POZ domain	IPR013087,Zinc finger C2H2-type;IPR011333,SKP1/BTB/POZ domain superfamily;IPR000210,BTB/POZ domain;IPR036236,Zinc finger C2H2 superfamily	KOG1721,FOG: Zn-finger;COG5048,FOG: Zn-finger	GO:0043565,molecular_function,sequence-specific DNA binding;GO:0005737,cellular_component,cytoplasm;GO:0003676,molecular_function,nucleic acid binding;GO:0008285,biological_process,negative regulation of cell proliferation;GO:0045944,biological_process,positive regulation of transcription by RNA polymerase II;GO:0001223,molecular_function,transcription coactivator binding;GO:0008134,molecular_fun…	-
CTD-2012K14.4	128.481	14.2462	3.15802	3.98365	1.43e-12	2.5e-11	ENSG00000260894	G1QXS2,RHO family interacting cell polarization regulator 1	-	PF13646,HEAT repeats;PF15903,ilopodia upregulated, FAM65	IPR011989,Armadillo-like helical;IPR026136,RIPOR family member 3;IPR031780,FAM65, N-terminal;IPR016024,Armadillo-type fold	ENOG410IGQR,-;ENOG410ZI73,-	-	-
SH3RF2	5.28638	0.588997	3.15564	4.48177	2.05e-15	6.87e-14	ENSG00000156463	Q08AM8,SH3 domain containing ring finger 2	NP_689763.3,putative E3 ubiquitin-protein ligase SH3RF2	PF07653,Variant SH3 domain;PF14604,Variant SH3 domain;PF00018,SH3 domain;PF13445,RING-type zinc-finger	IPR035792,Putative E3 ubiquitin-protein ligase SH3RF2, first SH3 domain;IPR035822,SH3RF2, third SH3 domain;IPR017907,Zinc finger, RING-type, conserved site;IPR013083,Zinc finger, RING/FYVE/PHD-type;IPR001841,Zinc finger, RING-type;IPR035794,Putative E3 ubiquitin-protein ligase SH3RF2, second SH3 domain;IPR001452,SH3 domain;IPR036028,SH3-like domain superfamily;IPR028511,Putative E3 ubiquitin-prot…	ENOG410ITG6,-;ENOG410XS5R,-	GO:0005515,molecular_function,protein binding;GO:0046872,molecular_function,metal ion binding	-
FOXO3B	4.55707	0.50985	3.11595	2.52207	9.87e-06	3.76e-05	ENSG00000240445	G3RNK9,Forkhead box O3	-	PF00250,orkhead domain;PF16675,KIX-binding domain of forkhead box O, CR2;PF16676,Transactivation domain of FOXO protein family	-	-	-	-
ARL6	1.92086	0.214908	3.11595	2.52207	9.87e-06	3.76e-05	ENSG00000113966	G1QNA6,ADP ribosylation factor like GTPase 6	-	PF00025,ADP-ribosylation factor family	-	-	-	-
MAN2B2	8.00607	0.92061	3.11508	5.3532	1.17e-21	1.25e-19	ENSG00000013288	Q4VC00,Alpha-mannosidase	-	PF01074,lycosyl hydrolases family 38 N-terminal domain;PF07748,lycosyl hydrolases family 38 C-terminal domain;PF09261,Alpha mannosidase middle domain	IPR000602,Glycoside hydrolase family 38, N-terminal domain;IPR011013,Galactose mutarotase-like domain superfamily;IPR037094,Glycoside hydrolase family 38, central domain superfamily;IPR027291,Glycoside hydrolase 38, N-terminal domain superfamily;IPR011330,Glycoside hydrolase/deacetylase, beta/alpha-barrel;IPR013780,Glycosyl hydrolase, all-beta;IPR015341,Glycoside hydrolase family 38, central doma…	KOG1959,Glycosyl hydrolase, family 38 - alpha-mannosidase;ENOG410XQMZ,-	GO:0016798,molecular_function,hydrolase activity, acting on glycosyl bonds;GO:0005975,biological_process,carbohydrate metabolic process;GO:0016787,molecular_function,hydrolase activity;GO:0006013,biological_process,mannose metabolic process;GO:0003824,molecular_function,catalytic activity;GO:0046872,molecular_function,metal ion binding;GO:0030246,molecular_function,carbohydrate binding;GO:0008152…	-
RP11-572N21.1	1.89725	0.209437	3.11381	2.0325	0.000339552	0.000912103	ENSG00000280414	H0XXC7,Sp9 transcription factor	XP_003791555.1,transcription factor Sp9	PF00096,Zinc finger, C2H2 type	IPR013087,Zinc finger C2H2-type;IPR036236,Zinc finger C2H2 superfamily	KOG1721,FOG: Zn-finger;COG5048,FOG: Zn-finger	GO:0003676,molecular_function,nucleic acid binding;GO:0030326,biological_process,embryonic limb morphogenesis	-
ZNF273	0.686142	0.0757428	3.11381	2.0325	0.000339552	0.000912103	ENSG00000198039	H2QUM9,Zinc finger protein 273	-	PF00096,Zinc finger, C2H2 type;PF01352,KRAB box	IPR013087,Zinc finger C2H2-type;IPR001909,Krueppel-associated box;IPR036051,KRAB domain superfamily;IPR036236,Zinc finger C2H2 superfamily	KOG1721,FOG: Zn-finger;COG5048,FOG: Zn-finger	GO:0006355,biological_process,regulation of transcription, DNA-templated;GO:0003676,molecular_function,nucleic acid binding;GO:0046872,molecular_function,metal ion binding;GO:0005622,cellular_component,intracellular	-
MAN1C1	0.34201	0.0363022	3.1078	1.27046	0.00788025	0.0153829	ENSG00000117643	G3R750,alpha-1,2-Mannosidase	XP_004025245.2,mannosyl-oligosaccharide 1,2-alpha-mannosidase IC	PF01532,lycosyl hydrolase family 47	IPR012341,Six-hairpin glycosidase-like superfamily;IPR036026,Seven-hairpin glycosidases;IPR001382,Glycoside hydrolase family 47	-	GO:0016798,molecular_function,hydrolase activity, acting on glycosyl bonds;GO:0016787,molecular_function,hydrolase activity;GO:0004571,molecular_function,mannosyl-oligosaccharide 1,2-alpha-mannosidase activity;GO:0003824,molecular_function,catalytic activity;GO:0005509,molecular_function,calcium ion binding;GO:0008152,biological_process,metabolic process;GO:0016020,cellular_component,membrane;GO:…	-
RP5-862P8.3	9.52772	1.01131	3.1078	1.27046	0.00788025	0.0153829	ENSG00000251508	H2N3D8,Pecanex homolog 2	-	PF05041,Pecanex protein (C-terminus)	IPR007735,Pecanex	KOG3604,Pecanex;ENOG4111D2H,-	GO:0016021,cellular_component,integral component of membrane;GO:0016020,cellular_component,membrane	-
AL356053.1	1.06045	0.11256	3.1078	1.27046	0.00788025	0.0153829	ENSG00000150076	H2RBE8,Uncharacterized protein	XP_009456495.2,trichohyalin isoform X6	-	IPR029272,Coiled-coil domain-containing protein 7	ENOG41117EC,-;ENOG410J0QB,-	-	-
ACSL5	0.728749	0.0773521	3.1078	1.27046	0.00788025	0.0153829	ENSG00000197142	H2R2B0,Acyl-CoA synthetase long-chain family member 5	XP_001146649.1,long-chain-fatty-acid--CoA ligase 5 isoform X1	PF00501,AMP-binding enzyme	IPR000873,AMP-dependent synthetase/ligase;IPR020845,AMP-binding, conserved site	KOG1256,Long-chain acyl-CoA synthetases (AMP-forming);COG1022,Long-chain acyl-CoA synthetases (AMP-forming)	GO:0005730,cellular_component,nucleolus;GO:0003824,molecular_function,catalytic activity;GO:0005743,cellular_component,mitochondrial inner membrane;GO:0005739,cellular_component,mitochondrion;GO:0008152,biological_process,metabolic process;GO:0016020,cellular_component,membrane;GO:0005634,cellular_component,nucleus;GO:0016021,cellular_component,integral component of membrane	-
RP11-129M16.4	1.98775	0.210987	3.1078	1.27046	0.00788025	0.0153829	-	-	-	-	-	-	-	-
KIAA1024	0.453968	0.0481858	3.1078	1.27046	0.00788025	0.0153829	ENSG00000169330	H2Q9X4,KIAA1024	XP_001154012.1,UPF0258 protein KIAA1024 homolog isoform X1	PF06789,Uncharacterised protein family (UPF0258)	IPR009626,Uncharacterised protein family UPF0258	ENOG410ZD1X,-;ENOG410IFF3,-	GO:0016021,cellular_component,integral component of membrane;GO:0016020,cellular_component,membrane	-
MMP28	1.08012	0.114648	3.1078	1.27046	0.00788025	0.0153829	ENSG00000271447	H2NTE2,Matrix metallopeptidase 28	-	PF00413,Matrixin;PF01471,Putative peptidoglycan binding domain;PF00045,Hemopexin	IPR001818,Peptidase M10, metallopeptidase;IPR028735,Matrix metalloproteinase-28;IPR036375,Hemopexin-like domain superfamily;IPR036365,PGBD-like superfamily;IPR021190,Peptidase M10A;IPR000585,Hemopexin-like domain;IPR024079,Metallopeptidase, catalytic domain superfamily;IPR006026,Peptidase, metallopeptidase;IPR018487,Hemopexin-like repeats;IPR033739,Peptidase M10A, catalytic domain;IPR002477,Pepti…	KOG1565,Gelatinase A and related matrix metalloproteases;ENOG410XQ5D,-	GO:0006508,biological_process,proteolysis;GO:0010760,biological_process,negative regulation of macrophage chemotaxis;GO:0016787,molecular_function,hydrolase activity;GO:0005578,,;GO:0005737,cellular_component,cytoplasm;GO:0008237,molecular_function,metallopeptidase activity;GO:0031012,cellular_component,extracellular matrix;GO:0046872,molecular_function,metal ion binding;GO:0004222,molecular_func…	-
AC002117.1	4.43532	0.470781	3.1078	1.27046	0.00788025	0.0153829	-	-	-	-	-	-	-	-
RP11-318A15.7	6.44464	0.684057	3.1078	1.27046	0.00788025	0.0153829	ENSG00000267168	K7EN84,Uncharacterized protein	-	PF10294,Lysine methyltransferase	IPR029063,S-adenosyl-L-methionine-dependent methyltransferase;IPR019410,Lysine methyltransferase	COG0500,SAM-dependent methyltransferases;KOG2793,Putative N2,N2-dimethylguanosine tRNA methyltransferase	-	-
ZNF799	0.610679	0.0648197	3.1078	1.27046	0.00788025	0.0153829	ENSG00000196466	M0R135,Uncharacterized protein	-	PF01352,KRAB box	IPR001909,Krueppel-associated box;IPR036051,KRAB domain superfamily	KOG1721,FOG: Zn-finger;COG5048,FOG: Zn-finger	GO:0006355,biological_process,regulation of transcription, DNA-templated;GO:0003676,molecular_function,nucleic acid binding;GO:0005622,cellular_component,intracellular	-
ZNF443	1.12132	0.119021	3.1078	1.27046	0.00788025	0.0153829	ENSG00000180855	B4DS18,cDNA FLJ59243, highly similar to Zinc finger protein 443	-	PF00096,Zinc finger, C2H2 type;PF13894,C2H2-type zinc finger;PF01352,KRAB box;PF13912,C2H2-type zinc finger	IPR013087,Zinc finger C2H2-type;IPR001909,Krueppel-associated box;IPR036051,KRAB domain superfamily;IPR036236,Zinc finger C2H2 superfamily	KOG1721,FOG: Zn-finger;COG5048,FOG: Zn-finger	GO:0006355,biological_process,regulation of transcription, DNA-templated;GO:0003676,molecular_function,nucleic acid binding;GO:0046872,molecular_function,metal ion binding;GO:0005622,cellular_component,intracellular	-
AC009299.2	1.01279	0.107501	3.1078	1.27046	0.00788025	0.0153829	-	-	-	-	-	-	-	-
DZANK1	0.466382	0.0495035	3.1078	1.27046	0.00788025	0.0153829	ENSG00000089091	A1L3Z8,C20orf12 protein	NP_001092877.1,double zinc ribbon and ankyrin repeat-containing protein 1 isoform 3	PF12773,ouble zinc ribbon;PF13287,n3 associated	IPR020683,Ankyrin repeat-containing domain;IPR026876,Fn3 associated repeat;IPR025874,Double zinc ribbon;IPR036770,Ankyrin repeat-containing domain superfamily	ENOG410XPI2,-;ENOG410IEZB,-	-	-
CPSF1P1	0.827609	0.0878454	3.1078	1.27046	0.00788025	0.0153829	ENSG00000214076	A0A0D9R822,Cleavage and polyadenylation specific factor 1	XP_008000112.1,cleavage and polyadenylation specificity factor subunit 1 isoform X2	PF10433,Mono-functional DNA-alkylating methyl methanesulfonate N-term;PF03178,CPSF A subunit region	IPR015943,WD40/YVTN repeat-like-containing domain superfamily;IPR004871,Cleavage/polyadenylation specificity factor, A subunit, C-terminal	-	GO:0019899,molecular_function,enzyme binding;GO:0005847,cellular_component,mRNA cleavage and polyadenylation specificity factor complex;GO:0003676,molecular_function,nucleic acid binding;GO:0035925,molecular_function,mRNA 3'-UTR AU-rich region binding;GO:0006378,biological_process,mRNA polyadenylation;GO:0005634,cellular_component,nucleus;GO:0005654,cellular_component,nucleoplasm	-
CHDH	0.397909	0.0422356	3.1078	1.27046	0.00788025	0.0153829	ENSG00000016391	A0A024R301,Choline dehydrogenase, isoform CRA_a	-	PF00732,MC oxidoreductase;PF05834,Lycopene cyclase protein;PF05199,MC oxidoreductase	IPR027424,Glucose Oxidase, domain 2;IPR012132,Glucose-methanol-choline oxidoreductase;IPR036188,FAD/NAD(P)-binding domain superfamily;IPR000172,Glucose-methanol-choline oxidoreductase, N-terminal;IPR007867,Glucose-methanol-choline oxidoreductase, C-terminal	COG2303,Choline dehydrogenase and related flavoproteins;KOG1238,Glucose dehydrogenase/choline dehydrogenase/mandelonitrile lyase (GMC oxidoreductase family)	GO:0055114,biological_process,oxidation-reduction process;GO:0050660,molecular_function,flavin adenine dinucleotide binding;GO:0016614,molecular_function,oxidoreductase activity, acting on CH-OH group of donors	-
CTD-2228K2.7	0.717569	0.0761654	3.1078	1.27046	0.00788025	0.0153829	ENSG00000225138	B4DKV9,cDNA FLJ60648	-	-	-	-	-	-
AC073130.1	1.20585	0.127994	3.1078	1.27046	0.00788025	0.0153829	ENSG00000237870	A4D0U4,Uncharacterized protein LOC286009	-	-	IPR036691,Endonuclease/exonuclease/phosphatase superfamily	-	-	-
BLNK	7.01661	0.806832	3.10563	3.93883	3.93e-12	6.2e-11	ENSG00000095585	B3KNL5,cDNA FLJ14873 fis, clone PLACE1002685, highly similar to B-cell linker protein	-	PF00017,SH2 domain	IPR036860,SH2 domain superfamily;IPR000980,SH2 domain	ENOG410XYB6,-;ENOG410IGWN,-	-	-
C5	1.74469	0.200621	3.08738	2.85948	1.33e-06	6.15e-06	ENSG00000106804	H2QXT1,Uncharacterized protein	XP_520228.2,complement C5 isoform X2	PF01821,Anaphylotoxin-like domain;PF07678,A-macroglobulin complement component;PF01759,UNC-6/NTR/C345C module;PF01835,MG2 domain;PF07703,Alpha-2-macroglobulin family N-terminal region;PF00207,Alpha-2-macroglobulin family;PF07677,A-macroglobulin receptor	IPR008993,Tissue inhibitor of metalloproteinases-like, OB-fold;IPR001599,Alpha-2-macroglobulin;IPR011626,Alpha-macroglobulin complement component;IPR018081,Anaphylatoxin, complement system;IPR009048,Alpha-macroglobulin, receptor-binding;IPR000020,Anaphylatoxin/fibulin;IPR037562,Complement C5;IPR002890,Alpha-2-macroglobulin, N-terminal;IPR001134,Netrin domain;IPR018933,Netrin module, non-TIMP type…	ENOG410XRED,-;KOG1366,Alpha-macroglobulin	GO:0004866,molecular_function,endopeptidase inhibitor activity;GO:0010951,biological_process,negative regulation of endopeptidase activity;GO:0010760,biological_process,negative regulation of macrophage chemotaxis;GO:0006956,biological_process,complement activation;GO:0045766,biological_process,positive regulation of angiogenesis;GO:0001701,biological_process,in utero embryonic development;GO:001…	-
ZNF230	1.35735	0.15608	3.07658	2.49038	9.87e-06	3.76e-05	ENSG00000159882	H2QGI8,Uncharacterized protein	XP_001158754.1,zinc finger protein 230 isoform X2	PF00096,Zinc finger, C2H2 type;PF01352,KRAB box	IPR013087,Zinc finger C2H2-type;IPR001909,Krueppel-associated box;IPR036051,KRAB domain superfamily;IPR036236,Zinc finger C2H2 superfamily	KOG1721,FOG: Zn-finger;COG5048,FOG: Zn-finger	GO:0006355,biological_process,regulation of transcription, DNA-templated;GO:0003676,molecular_function,nucleic acid binding;GO:0046872,molecular_function,metal ion binding;GO:0005622,cellular_component,intracellular	-
ADGRF4	4.13157	0.483137	3.06973	3.13127	6.58e-08	4.03e-07	ENSG00000153294	A0A0C4DFV3,Adhesion G protein-coupled receptor F4	-	PF00002,7 transmembrane receptor (Secretin family);PF01825,PCR proteolysis site, GPS, motif	IPR000832,GPCR, family 2, secretin-like;IPR000203,GPS motif;IPR017981,GPCR, family 2-like;IPR008078,GPCR family 2, Ig-hepta-like receptor	ENOG410XSD2,-;KOG4193,G protein-coupled receptors	GO:0004888,molecular_function,transmembrane signaling receptor activity;GO:0016020,cellular_component,membrane;GO:0007166,biological_process,cell surface receptor signaling pathway;GO:0007186,biological_process,G-protein coupled receptor signaling pathway;GO:0004930,molecular_function,G-protein coupled receptor activity;GO:0016021,cellular_component,integral component of membrane	-
CHAMP1	7.2872	0.864133	3.06396	4.17472	4.45e-13	8.76e-12	ENSG00000198824	H2R2U0,Chromosome alignment maintaining phosphoprotein 1	XP_001141584.1,chromosome alignment-maintaining phosphoprotein 1;XP_003318217.2,-;XP_009439465.1,-	-	IPR013087,Zinc finger C2H2-type;IPR036236,Zinc finger C2H2 superfamily	ENOG410XXII,-;ENOG410IFC8,-	GO:0031134,biological_process,sister chromatid biorientation;GO:0003676,molecular_function,nucleic acid binding;GO:0005819,cellular_component,spindle;GO:0034501,biological_process,protein localization to kinetochore;GO:0051315,biological_process,attachment of mitotic spindle microtubules to kinetochore;GO:0035372,biological_process,protein localization to microtubule;GO:0000777,cellular_component…	-
ZNF124	4.88904	0.58032	3.05806	3.74037	1.13e-10	1.27e-09	ENSG00000196418	G1QW29,Zinc finger protein 124	-	PF00096,Zinc finger, C2H2 type;PF13894,C2H2-type zinc finger;PF01352,KRAB box	-	-	-	-
PIK3C2G	0.961864	0.110604	3.05527	1.98713	0.000556462	0.00142666	ENSG00000139144	F5H369,Phosphatidylinositol 4-phosphate 3-kinase C2 domain-containing subunit gamma	NP_001275701.1,phosphatidylinositol 4-phosphate 3-kinase C2 domain-containing subunit gamma isoform 1	PF00792,Phosphoinositide 3-kinase C2;PF00787,PX domain;PF00454,Phosphatidylinositol 3- and 4-kinase;PF00613,Phosphoinositide 3-kinase family, accessory domain (PIK domain);PF00168,C2 domain;PF00794,PI3-kinase family, ras-binding domain	IPR018936,Phosphatidylinositol 3/4-kinase, conserved site;IPR000341,Phosphatidylinositol 3-kinase Ras-binding (PI3K RBD) domain;IPR036871,PX domain superfamily;IPR000403,Phosphatidylinositol 3-/4-kinase, catalytic domain;IPR015433,Phosphatidylinositol kinase;IPR037707,PI3K-C2-gamma, catalytic domain;IPR036940,Phosphatidylinositol 3-/4-kinase, catalytic domain superfamily;IPR016024,Armadillo-type …	KOG0905,Phosphoinositide 3-kinase;COG5032,Phosphatidylinositol kinase and protein kinases of the PI-3 kinase family	GO:0016301,molecular_function,kinase activity;GO:0035005,molecular_function,1-phosphatidylinositol-4-phosphate 3-kinase activity;GO:0016740,molecular_function,transferase activity;GO:0035091,molecular_function,phosphatidylinositol binding;GO:0035004,molecular_function,phosphatidylinositol 3-kinase activity;GO:0005622,cellular_component,intracellular;GO:0048015,biological_process,phosphatidylinosi…	-
RP11-582E3.6	3.06236	0.352137	3.05527	1.98713	0.000556462	0.00142666	ENSG00000275764	L0W7A2,RNA-directed DNA polymerase	WP_008930570.1,RNA-directed DNA polymerase, partial	PF08333,Protein of unknown function (DUF1725);PF00078,Reverse transcriptase (RNA-dependent DNA polymerase)	IPR013544,Domain of unknown function DUF1725;IPR000477,Reverse transcriptase domain	-	GO:0003964,molecular_function,RNA-directed DNA polymerase activity;GO:0006278,biological_process,RNA-dependent DNA biosynthetic process	-
MIP	1.70222	0.195737	3.05527	1.98713	0.000556462	0.00142666	ENSG00000135517	G3RKA2,Major intrinsic protein of lens fiber	XP_004053430.1,-	PF00230,Major intrinsic protein	IPR023271,Aquaporin-like;IPR000425,Major intrinsic protein;IPR034294,Aquaporin transporter;IPR022357,Major intrinsic protein, conserved site	-	GO:0005212,molecular_function,structural constituent of eye lens;GO:0015267,molecular_function,channel activity;GO:0055085,biological_process,transmembrane transport;GO:0045785,biological_process,positive regulation of cell adhesion;GO:1990349,biological_process,gap junction-mediated intercellular transport;GO:0005783,cellular_component,endoplasmic reticulum;GO:0051289,biological_process,protein …	-
CTB-134H23.2	4.20904	0.483993	3.05527	1.98713	0.000556462	0.00142666	ENSG00000196796	E9PS57,Nuclear pore complex-interacting protein family member B6	XP_016879119.1,-;XP_005255798.1,nuclear pore complex-interacting protein family member B6 isoform X4	PF06409,Nuclear pore complex interacting protein (NPIP)	IPR009443,Nuclear pore complex interacting protein	-	GO:0005654,cellular_component,nucleoplasm	-
RP11-67A1.2	10.3808	1.19367	3.05527	1.98713	0.000556462	0.00142666	ENSG00000261864	H3BR83,Nuclear factor of-activated T-cells, cytoplasmic 3	-	PF00554,Rel homology DNA-binding domain;PF16179,Rel homology dimerisation domain	IPR011539,Rel homology domain (RHD), DNA-binding domain;IPR008967,p53-like transcription factor, DNA-binding;IPR032397,Rel homology dimerisation domain;IPR008366,Nuclear factor of activated T cells (NFAT);IPR037059,Rel homology domain (RHD), DNA-binding domain superfamily;IPR013783,Immunoglobulin-like fold;IPR014756,Immunoglobulin E-set;IPR002909,IPT domain	ENOG4111EMW,-;ENOG410IIAD,-	GO:0006355,biological_process,regulation of transcription, DNA-templated;GO:0005829,cellular_component,cytosol;GO:0003700,molecular_function,DNA binding transcription factor activity;GO:0003677,molecular_function,DNA binding;GO:0005654,cellular_component,nucleoplasm	-
CTC-529I10.2	7.10604	0.817116	3.05527	1.98713	0.000556462	0.00142666	-	-	-	-	-	-	-	-
RP11-458J1.1	4.01624	0.461823	3.05527	1.98713	0.000556462	0.00142666	ENSG00000278834	I7G8L2,Macaca fascicularis brain cDNA clone: QmoA-11833, similar to human chemokine	-	-	-	-	-	-
MGAT5B	0.892428	0.102619	3.05527	1.98713	0.000556462	0.00142666	ENSG00000167889	G3RAM8,Mannosyl	XP_004040964.2,alpha-1,6-mannosylglycoprotein 6-beta-N-acetylglucosaminyltransferase B isoform X2	PF15024,lycosyltransferase family 18	IPR026116,Glycosyltransferase family 18	-	GO:0030144,molecular_function,alpha-1,6-mannosylglycoprotein 6-beta-N-acetylglucosaminyltransferase activity;GO:0006487,biological_process,protein N-linked glycosylation;GO:0016021,cellular_component,integral component of membrane;GO:0016020,cellular_component,membrane	-
ZNF549	0.614187	0.0706247	3.05527	1.98713	0.000556462	0.00142666	ENSG00000121406	H2P0D5,Zinc finger protein 549	-	PF00096,Zinc finger, C2H2 type;PF01352,KRAB box	IPR013087,Zinc finger C2H2-type;IPR001909,Krueppel-associated box;IPR036051,KRAB domain superfamily;IPR036236,Zinc finger C2H2 superfamily	KOG1721,FOG: Zn-finger;COG5048,FOG: Zn-finger	GO:0006355,biological_process,regulation of transcription, DNA-templated;GO:0003676,molecular_function,nucleic acid binding;GO:0046872,molecular_function,metal ion binding;GO:0005622,cellular_component,intracellular	-
RP11-503P10.1	8.64802	0.994426	3.05527	1.98713	0.000556462	0.00142666	ENSG00000272056	H2P6Q5,ATP/GTP binding protein like 5	XP_002812245.1,cytosolic carboxypeptidase-like protein 5	PF00246,Zinc carboxypeptidase	IPR000834,Peptidase M14, carboxypeptidase A;IPR034286,Cytosolic carboxypeptidase-like protein 5 catalytic domain	KOG3641,Zinc carboxypeptidase;COG2866,Predicted carboxypeptidase	GO:0030496,cellular_component,midbody;GO:0051607,biological_process,defense response to virus;GO:0035608,biological_process,protein deglutamylation;GO:0006508,biological_process,proteolysis;GO:0005737,cellular_component,cytoplasm;GO:0045171,cellular_component,intercellular bridge;GO:0015631,molecular_function,tubulin binding;GO:0004181,molecular_function,metallocarboxypeptidase activity;GO:003561…	-
RP4-800J21.3	3.70068	0.425537	3.05527	1.98713	0.000556462	0.00142666	ENSG00000218018	Q8N1N1,cDNA FLJ39107 fis, clone NTONG2005062	-	-	-	-	-	-
AP1S2	1.04493	0.120155	3.05527	1.98713	0.000556462	0.00142666	ENSG00000182287	A0A096NA58,AP complex subunit sigma	XP_017809514.1,-;XP_017809513.1,-	PF01217,Clathrin adaptor complex small chain	IPR011012,Longin-like domain superfamily;IPR022775,AP complex, mu/sigma subunit;IPR000804,Clathrin adaptor complex, small chain;IPR016635,Adaptor protein complex, sigma subunit	-	GO:0015031,biological_process,protein transport;GO:0016020,cellular_component,membrane;GO:0016192,biological_process,vesicle-mediated transport;GO:0030117,cellular_component,membrane coat;GO:0008565,molecular_function,protein transporter activity;GO:0006886,biological_process,intracellular protein transport	-
TRAF3IP2	9.9289	1.20005	3.043	5.23308	4.14e-20	3.43e-18	ENSG00000056972	H2QTK6,Uncharacterized protein	-	PF08357,SEFIR domain	IPR013568,SEFIR domain	ENOG410IF9W,-;ENOG4111GTJ,-	GO:0006959,biological_process,humoral immune response;GO:0001783,biological_process,B cell apoptotic process;GO:0005102,molecular_function,signaling receptor binding;GO:0002230,biological_process,positive regulation of defense response to virus by host;GO:0048305,biological_process,immunoglobulin secretion;GO:0043123,biological_process,positive regulation of I-kappaB kinase/NF-kappaB signaling	-
CABLES2	10.6653	1.29853	3.02913	4.56903	2.3e-15	7.57e-14	ENSG00000149679	H2R8T8,Uncharacterized protein	-	PF00134,Cyclin, N-terminal domain	IPR013763,Cyclin-like;IPR012388,CDK5 and ABL1 enzyme substrate 1/2;IPR036915,Cyclin-like superfamily;IPR006671,Cyclin, N-terminal	KOG4164,Cyclin ik3-1/CABLES;ENOG4110WYV,-	GO:0051726,biological_process,regulation of cell cycle	-
ZNF107	2.984	0.366002	3.01082	3.70049	3.28e-10	3.37e-09	ENSG00000196247	G3QH98,Uncharacterized protein	-	PF00096,Zinc finger, C2H2 type;PF01352,KRAB box	IPR013087,Zinc finger C2H2-type;IPR036236,Zinc finger C2H2 superfamily	-	GO:0003676,molecular_function,nucleic acid binding;GO:0046872,molecular_function,metal ion binding	-
RP11-316M1.12	57.9916	7.15974	3.01008	4.72521	1.46e-16	6.21e-15	-	-	-	-	-	-	-	-
GLUD2	0.952508	0	6.12904	0.910906	0.00464265	0.00958981	ENSG00000182890	A0A140VK14,Testicular secretory protein Li 14	NP_036216.2,glutamate dehydrogenase 2, mitochondrial precursor	PF00208,lutamate/Leucine/Phenylalanine/Valine dehydrogenase;PF02812,lu/Leu/Phe/Val dehydrogenase, dimerisation domain	IPR036291,NAD(P)-binding domain superfamily;IPR006096,Glutamate/phenylalanine/leucine/valine dehydrogenase, C-terminal;IPR033922,NAD(P) binding domain of glutamate dehydrogenase;IPR006097,Glutamate/phenylalanine/leucine/valine dehydrogenase, dimerisation domain;IPR033524,Leu/Phe/Val dehydrogenases active site;IPR006095,Glutamate/phenylalanine/leucine/valine dehydrogenase	-	GO:0055114,biological_process,oxidation-reduction process;GO:0016491,molecular_function,oxidoreductase activity;GO:0006520,biological_process,cellular amino acid metabolic process;GO:0005739,cellular_component,mitochondrion;GO:0016639,molecular_function,oxidoreductase activity, acting on the CH-NH2 group of donors, NAD or NADP as acceptor	K00261,ko00250,Alanine, aspartate and glutamate metabolism;K00261,ko01200,Carbon metabolism;K00261,ko04964,Proximal tubule bicarbonate reclamation;K00261,ko00220,Arginine biosynthesis;K00261,ko00910,Nitrogen metabolism;K00261,ko00471,D-Glutamine and D-glutamate metabolism
B3GALNT1	0.454143	0	5.81226	0.694588	0.0172979	0.0307366	ENSG00000169255	K6ZKE2,Hexosyltransferase	XP_009445047.2,-;XP_016797741.1,-;XP_009445045.2,-;XP_016797742.1,-;XP_003310123.2,beta-1,3-N-acetylgalactosaminyltransferase 1;XP_003310130.2,-	PF01762,alactosyltransferase	IPR002659,Glycosyl transferase, family 31	ENOG410ZZ1B,-;KOG2287,Galactosyltransferases	GO:0016757,molecular_function,transferase activity, transferring glycosyl groups;GO:0008378,molecular_function,galactosyltransferase activity;GO:0006486,biological_process,protein glycosylation;GO:0005794,cellular_component,Golgi apparatus;GO:0016740,molecular_function,transferase activity;GO:0000139,cellular_component,Golgi membrane;GO:0016020,cellular_component,membrane;GO:0016021,cellular_comp…	K00719,ko00603,Glycosphingolipid biosynthesis - globo series
RP11-421N8.1	4.29792	0	5.81226	0.694588	0.0172979	0.0307366	ENSG00000260747	G3QR73,ATP synthase, H+ transporting, mitochondrial Fo complex subunit B1	XP_004026390.1,ATP synthase F(0) complex subunit B1, mitochondrial	PF05405,Mitochondrial ATP synthase B chain precursor (ATP-synt_B)	IPR008688,ATP synthase, F0 complex, subunit B/MI25;IPR013837,ATP synthase, F0 complex, subunit B	-	GO:0015986,biological_process,ATP synthesis coupled proton transport;GO:0000276,cellular_component,mitochondrial proton-transporting ATP synthase complex, coupling factor F(o);GO:0015078,molecular_function,proton transmembrane transporter activity	K02127,ko00190,Oxidative phosphorylation;K02127,ko05016,Huntington's disease;K02127,ko05012,Parkinson's disease;K02127,ko05010,Alzheimer's disease
BHLHE41	1.26309	0.0829948	3.7936	1.78201	0.000700954	0.00175135	ENSG00000123095	H2Q5M4,Uncharacterized protein	XP_520805.2,-	PF00010,Helix-loop-helix DNA-binding domain;PF07527,Hairy Orange	IPR003650,Orange domain;IPR011598,Myc-type, basic helix-loop-helix (bHLH) domain;IPR036638,Helix-loop-helix DNA-binding domain superfamily	KOG4304,Transcriptional repressors of the hairy/E(spl) family (contains HLH);ENOG4111F0X,-	GO:0003705,molecular_function,transcription factor activity, RNA polymerase II distal enhancer sequence-specific binding;GO:0046983,molecular_function,protein dimerization activity;GO:0001078,molecular_function,transcriptional repressor activity, RNA polymerase II proximal promoter sequence-specific DNA binding;GO:0000122,biological_process,negative regulation of transcription by RNA polymerase I…	K03730,ko04710,Circadian rhythm
ADRA2C	1.63465	0	6.70712	1.33804	0.000352487	0.000943384	ENSG00000184160	G1SAI1,Adrenoceptor alpha 2C	-	PF00001,7 transmembrane receptor (rhodopsin family)	IPR000276,G protein-coupled receptor, rhodopsin-like;IPR002233,Adrenoceptor family;IPR000735,Alpha 2C adrenoceptor;IPR017452,GPCR, rhodopsin-like, 7TM	ENOG410XRW9,-;KOG3656,FOG: 7 transmembrane receptor	GO:0071875,biological_process,adrenergic receptor signaling pathway;GO:0004930,molecular_function,G-protein coupled receptor activity;GO:0004938,molecular_function,alpha2-adrenergic receptor activity;GO:0007186,biological_process,G-protein coupled receptor signaling pathway;GO:0004935,molecular_function,adrenergic receptor activity;GO:0004871,molecular_function,signal transducer activity;GO:00069…	K04140,ko04080,Neuroactive ligand-receptor interaction;K04140,ko04022,cGMP-PKG signaling pathway
TRPM6	0.49078	0.0356427	3.65025	1.67085	0.00118753	0.00282164	ENSG00000119121	H2R0H5,Uncharacterized protein	-	PF16519,Tetramerisation domain of TRPM;PF00520,Ion transport protein;PF02816,Alpha-kinase family	IPR004166,MHCK/EF2 kinase;IPR011009,Protein kinase-like domain superfamily;IPR032415,TRPM, tetramerisation domain;IPR005821,Ion transport domain;IPR029597,Transient receptor potential cation channel subfamily M member 6;IPR037162,TRPM, tetramerisation domain superfamily	ENOG410INBW,-;ENOG410ZSH9,-	GO:0005216,molecular_function,ion channel activity;GO:0051262,biological_process,protein tetramerization;GO:0005261,molecular_function,cation channel activity;GO:0055085,biological_process,transmembrane transport;GO:0006812,biological_process,cation transport;GO:0006811,biological_process,ion transport;GO:0098655,biological_process,cation transmembrane transport;GO:0004674,molecular_function,prot…	K04981,ko04978,Mineral absorption
WASF1	8.52234	0.904592	3.22096	4.03773	2.68e-13	5.62e-12	ENSG00000112290	F7AUN9,WAS protein family member 1	XP_002747049.1,wiskott-Aldrich syndrome protein family member 1	PF02205,WH2 motif	IPR003124,WH2 domain;IPR028288,SCAR/WAVE family	ENOG410XRBQ,-;KOG1830,Wiskott Aldrich syndrome proteins	GO:0006898,biological_process,receptor-mediated endocytosis;GO:0031209,cellular_component,SCAR complex;GO:0005741,cellular_component,mitochondrial outer membrane;GO:2000601,biological_process,positive regulation of Arp2/3 complex-mediated actin nucleation;GO:0030036,biological_process,actin cytoskeleton organization;GO:0005737,cellular_component,cytoplasm;GO:0051388,biological_process,positive re…	K05753,ko04810,Regulation of actin cytoskeleton;K05753,ko04666,Fc gamma R-mediated phagocytosis;K05753,ko05131,Shigellosis;K05753,ko04520,Adherens junction;K05753,ko05132,Salmonella infection;K05753,ko05100,Bacterial invasion of epithelial cells;K05753,ko05231,Choline metabolism in cancer
TICAM1	11.4471	1.3469	3.07517	4.18432	3.26e-13	6.65e-12	ENSG00000127666	G3QUW7,Toll like receptor adaptor molecule 1	-	PF12721,RIP homotypic interaction motif	IPR025735,RHIM domain;IPR017278,TIR domain-containing adapter molecule 1;IPR035897,Toll/interleukin-1 receptor homology (TIR) domain superfamily	-	GO:0045087,biological_process,innate immune response;GO:0007165,biological_process,signal transduction;GO:0004871,molecular_function,signal transducer activity	K05842,ko04064,NF-kappa B signaling pathway;K05842,ko05161,Hepatitis B;K05842,ko05133,Pertussis;K05842,ko05168,Herpes simplex infection;K05842,ko05160,Hepatitis C;K05842,ko04620,Toll-like receptor signaling pathway;K05842,ko05164,Influenza A;K05842,ko05142,Chagas disease (American trypanosomiasis)
MAML3	1.52392	0.0934579	3.95811	2.72045	7.82e-08	4.7e-07	ENSG00000196782	F6RJ30,Mastermind like transcriptional coactivator 3	XP_001088303.2,mastermind-like protein 3	-	IPR019082,Neurogenic mastermind-like, N-terminal	ENOG410ZYVU,-;ENOG410IJ3G,-	GO:0003713,molecular_function,transcription coactivator activity;GO:0045944,biological_process,positive regulation of transcription by RNA polymerase II;GO:0007219,biological_process,Notch signaling pathway;GO:0016607,cellular_component,nuclear speck;GO:0007221,biological_process,positive regulation of transcription of Notch receptor target;GO:0005634,cellular_component,nucleus	K06061,ko04330,Notch signaling pathway
ITGA1	0.140691	0	6.26467	1.00757	0.00242129	0.00536972	ENSG00000213949	H2QQV4,Integrin, alpha 1	XP_517769.2,integrin alpha-1	PF01839,-GAP repeat;PF08441,Integrin alpha;PF00092,von Willebrand factor type A domain	IPR013517,FG-GAP repeat;IPR036465,von Willebrand factor A-like domain superfamily;IPR018184,Integrin alpha chain, C-terminal cytoplasmic region, conserved site;IPR032695,Integrin domain superfamily;IPR013649,Integrin alpha-2;IPR013519,Integrin alpha beta-propellor;IPR000413,Integrin alpha chain;IPR002035,von Willebrand factor, type A;IPR028994,Integrin alpha, N-terminal	ENOG410YEM8,-;ENOG410IPB7,-	GO:0008305,cellular_component,integrin complex;GO:0009986,cellular_component,cell surface;GO:0007155,biological_process,cell adhesion;GO:0009897,cellular_component,external side of plasma membrane;GO:0007160,biological_process,cell-matrix adhesion;GO:0016020,cellular_component,membrane;GO:0008285,biological_process,negative regulation of cell proliferation;GO:0042059,biological_process,negative r…	K06480,ko04151,PI3K-Akt signaling pathway;K06480,ko05414,Dilated cardiomyopathy;K06480,ko04810,Regulation of actin cytoskeleton;K06480,ko04512,ECM-receptor interaction;K06480,ko04510,Focal adhesion;K06480,ko04640,Hematopoietic cell lineage;K06480,ko05412,Arrhythmogenic right ventricular cardiomyopathy (ARVC);K06480,ko05410,Hypertrophic cardiomyopathy (HCM)
CD58	12.7853	1.47017	3.10379	3.77915	3.91e-11	4.89e-10	ENSG00000116815	G3RR66,CD58 molecule	XP_004026463.1,lymphocyte function-associated antigen 3 isoform X1	-	IPR036179,Immunoglobulin-like domain superfamily;IPR013783,Immunoglobulin-like fold	-	GO:0009986,cellular_component,cell surface;GO:0005102,molecular_function,signaling receptor binding;GO:0071356,biological_process,cellular response to tumor necrosis factor;GO:2000484,biological_process,positive regulation of interleukin-8 secretion;GO:0071346,biological_process,cellular response to interferon-gamma;GO:0016020,cellular_component,membrane;GO:0034113,biological_process,heterotypic …	K06492,ko05169,Epstein-Barr virus infection;K06492,ko04514,Cell adhesion molecules (CAMs)
CD274	0.80926	0.0797623	3.21358	1.34582	0.0160841	0.0291487	ENSG00000120217	H2QWZ8,CD274 molecule	XP_001140705.1,programmed cell death 1 ligand 1 isoform X2	PF08205,CD80-like C2-set immunoglobulin domain;PF07686,Immunoglobulin V-set domain	IPR007110,Immunoglobulin-like domain;IPR013162,CD80-like, immunoglobulin C2-set;IPR036179,Immunoglobulin-like domain superfamily;IPR013783,Immunoglobulin-like fold;IPR003599,Immunoglobulin subtype;IPR013106,Immunoglobulin V-set domain	ENOG410IIBU,-;ENOG4111V14,-	GO:0006955,biological_process,immune response;GO:1903556,biological_process,negative regulation of tumor necrosis factor superfamily cytokine production;GO:0070062,cellular_component,extracellular exosome;GO:0034097,biological_process,response to cytokine;GO:0009897,cellular_component,external side of plasma membrane;GO:0032693,biological_process,negative regulation of interleukin-10 production;G…	K06745,ko04514,Cell adhesion molecules (CAMs)
SEMA5A	0.137408	0	5.62328	0.57227	0.0336166	0.0553898	ENSG00000112902	X5DR95,Semaphorin 5A isoform A	XP_011512458.1,-;NP_003957.2,semaphorin-5A precursor;XP_011512459.1,-;XP_006714570.1,-;XP_006714569.1,-;XP_011512457.1,-;XP_011512460.1,-	PF01403,Sema domain;PF00090,Thrombospondin type 1 domain	IPR001627,Sema domain;IPR000884,Thrombospondin type-1 (TSP1) repeat;IPR036352,Sema domain superfamily;IPR016201,PSI domain;IPR015943,WD40/YVTN repeat-like-containing domain superfamily;IPR027231,Semaphorin;IPR036383,Thrombospondin type-1 (TSP1) repeat superfamily	KOG3611,Semaphorins;ENOG410XQZC,-	GO:0016021,cellular_component,integral component of membrane;GO:0016020,cellular_component,membrane	K06841,ko04360,Axon guidance
FUT4	0.744635	0.0540788	3.65025	1.67085	0.00118753	0.00282164	ENSG00000196371	K7AZS5,Fucosyltransferase 4	NP_001008985.2,alpha-(1,3)-fucosyltransferase 4	PF17039,ucosyltransferase, N-terminal;PF00852,lycosyltransferase family 10 (fucosyltransferase) C-term	IPR001503,Glycosyl transferase family 10;IPR038577,GT10-like superfamily;IPR031481,Fucosyltransferase, N-terminal	KOG2619,Fucosyltransferase;ENOG410ZIMX,-	GO:0009986,cellular_component,cell surface;GO:0016021,cellular_component,integral component of membrane;GO:0032580,cellular_component,Golgi cisterna membrane;GO:0006486,biological_process,protein glycosylation;GO:0005794,cellular_component,Golgi apparatus;GO:0016757,molecular_function,transferase activity, transferring glycosyl groups;GO:0016740,molecular_function,transferase activity;GO:0071944,…	K07632,ko00514,Other types of O-glycan biosynthesis;K07632,ko00601,Glycosphingolipid biosynthesis - lacto and neolacto series
ULBP1	7.93549	0.521425	3.89978	3.84414	4.41e-14	1.09e-12	ENSG00000111981	H2QZY1,UL16 binding protein 1	XP_001134754.1,NKG2D ligand 1 isoform X1	PF00129,Class I Histocompatibility antigen, domains alpha 1 and 2	IPR011161,MHC class I-like antigen recognition-like;IPR037055,MHC class I-like antigen recognition-like superfamily;IPR011162,MHC classes I/II-like antigen recognition protein	ENOG41113ZC,-;ENOG410J4VC,-	GO:0030101,biological_process,natural killer cell activation;GO:0015629,cellular_component,actin cytoskeleton;GO:0042267,biological_process,natural killer cell mediated cytotoxicity;GO:0005886,cellular_component,plasma membrane;GO:0016020,cellular_component,membrane;GO:0046658,cellular_component,anchored component of plasma membrane;GO:0005829,cellular_component,cytosol;GO:0046703,molecular_funct…	K07986,ko04650,Natural killer cell mediated cytotoxicity
ATG4A	4.38088	0.447781	3.25683	2.99962	1.55e-07	8.75e-07	ENSG00000101844	G2HGQ3,Cysteine protease	NP_001233457.1,cysteine protease ATG4A	PF03416,Peptidase family C54	IPR033474,Autophagin-2;IPR005078,Peptidase C54	KOG2674,Cysteine protease required for autophagy - Apg4p/Aut2p;ENOG410XPQ0,-	GO:0000422,biological_process,autophagy of mitochondrion;GO:0006508,biological_process,proteolysis;GO:0016787,molecular_function,hydrolase activity;GO:0000045,biological_process,autophagosome assembly;GO:0005737,cellular_component,cytoplasm;GO:0015031,biological_process,protein transport;GO:0006914,biological_process,autophagy;GO:0006612,biological_process,protein targeting to membrane;GO:0051697…	K08342,ko04140,Regulation of autophagy
STX2	1.65833	0.176021	3.17008	2.07641	0.000206996	0.000585857	ENSG00000111450	H2Q774,Syntaxin 2	-	PF00804,Syntaxin;PF05739,SNARE domain	IPR000727,Target SNARE coiled-coil homology domain;IPR010989,SNARE;IPR006012,Syntaxin/epimorphin, conserved site;IPR028671,Syntaxin-2;IPR006011,Syntaxin, N-terminal domain	COG5074,t-SNARE complex subunit, syntaxin;KOG0810,SNARE protein Syntaxin 1 and related proteins	GO:0000149,molecular_function,SNARE binding;GO:0031629,biological_process,synaptic vesicle fusion to presynaptic active zone membrane;GO:0005484,molecular_function,SNAP receptor activity;GO:0048278,biological_process,vesicle docking;GO:0007340,biological_process,acrosome reaction;GO:0030154,biological_process,cell differentiation;GO:0005886,cellular_component,plasma membrane;GO:0016020,cellular_c…	K08486,ko04721,Synaptic vesicle cycle;K08486,ko04130,SNARE interactions in vesicular transport
OLR1	1.00981	0.107185	3.1078	1.27046	0.00788025	0.0153829	ENSG00000173391	A0A024RAU0,Oxidised low density lipoprotein	NP_002534.1,oxidized low-density lipoprotein receptor 1 isoform 1	PF08391,Ly49-like protein, N-terminal region;PF00059,Lectin C-type domain	IPR016187,C-type lectin fold;IPR013600,Ly49-like, N-terminal;IPR033992,Natural killer cell receptor-like, C-type lectin-like domain;IPR001304,C-type lectin-like;IPR016186,C-type lectin-like/link domain superfamily	KOG4297,C-type lectin;ENOG410XPJ1,-	GO:0043231,cellular_component,intracellular membrane-bounded organelle;GO:0030246,molecular_function,carbohydrate binding;GO:0005886,cellular_component,plasma membrane;GO:0016020,cellular_component,membrane;GO:0016021,cellular_component,integral component of membrane;GO:0005654,cellular_component,nucleoplasm	K08763,ko03320,PPAR signaling pathway;K08763,ko04145,Phagosome
DAPK1	0.399899	0.0367872	3.31213	1.41726	0.00961124	0.0184048	ENSG00000196730	K7D1C4,Death-associated protein kinase 1	XP_001140455.1,-;XP_009455105.1,-;XP_520110.2,death-associated protein kinase 1 isoform X2	PF12796,Ankyrin repeats (3 copies);PF00069,Protein kinase domain;PF00531,eath domain	IPR027417,P-loop containing nucleoside triphosphate hydrolase;IPR002110,Ankyrin repeat;IPR011029,Death-like domain superfamily;IPR020676,Death-associated protein kinase 1;IPR000488,Death domain;IPR017441,Protein kinase, ATP binding site;IPR008271,Serine/threonine-protein kinase, active site;IPR036770,Ankyrin repeat-containing domain superfamily;IPR020683,Ankyrin repeat-containing domain;IPR020859…	KOG0032,Ca2+/calmodulin-dependent protein kinase, EF-Hand protein superfamily;ENOG410XRMJ,-	GO:0016301,molecular_function,kinase activity;GO:0006915,biological_process,apoptotic process;GO:0005524,molecular_function,ATP binding;GO:0004672,molecular_function,protein kinase activity;GO:0006468,biological_process,protein phosphorylation;GO:0016310,biological_process,phosphorylation;GO:0007165,biological_process,signal transduction;GO:0004674,molecular_function,protein serine/threonine kina…	K08803,ko05219,Bladder cancer;K08803,ko05200,Pathways in cancer
OTX1	1.86706	0.203391	3.15428	2.55305	6.16e-06	2.46e-05	ENSG00000115507	G3QN56,Orthodenticle homeobox 1	XP_018876275.1,homeobox protein OTX1 isoform X2	PF03529,Otx1 transcription factor;PF00046,Homeobox domain	IPR009057,Homeobox-like domain superfamily;IPR003026,Transcription factor Otx1;IPR017970,Homeobox, conserved site;IPR013851,Transcription factor Otx, C-terminal;IPR001356,Homeobox domain;IPR003025,Transcription factor Otx	-	GO:0006355,biological_process,regulation of transcription, DNA-templated;GO:0003700,molecular_function,DNA binding transcription factor activity;GO:0003677,molecular_function,DNA binding;GO:0001077,molecular_function,transcriptional activator activity, RNA polymerase II proximal promoter sequence-specific DNA binding;GO:0043565,molecular_function,sequence-specific DNA binding;GO:0006357,biologica…	K09326,ko04550,Signaling pathways regulating pluripotency of stem cells
POU5F1	0.659383	0	5.81226	0.694588	0.0172979	0.0307366	ENSG00000204531	A0A140TAX9,POU domain protein	NP_001238970.1,-	PF00157,Pou domain - N-terminal to homeobox domain;PF00046,Homeobox domain	IPR009057,Homeobox-like domain superfamily;IPR010982,Lambda repressor-like, DNA-binding domain superfamily;IPR017970,Homeobox, conserved site;IPR015585,POU domain-containing protein, class 5;IPR013847,POU domain;IPR001356,Homeobox domain;IPR000327,POU-specific domain	-	GO:0003677,molecular_function,DNA binding;GO:0043565,molecular_function,sequence-specific DNA binding;GO:0003700,molecular_function,DNA binding transcription factor activity;GO:0006355,biological_process,regulation of transcription, DNA-templated;GO:0006351,biological_process,transcription, DNA-templated;GO:0005634,cellular_component,nucleus	K09367,ko04550,Signaling pathways regulating pluripotency of stem cells
FBXO32	14.3536	1.68373	3.08816	5.91857	2.15e-25	4.02e-23	ENSG00000156804	A0A024R9F3,F-box protein 32, isoform CRA_c	NP_478136.1,F-box only protein 32 isoform 1	-	IPR036047,F-box-like domain superfamily	ENOG410YPWK,-;KOG3926,F-box proteins	GO:0014894,biological_process,response to denervation involved in regulation of muscle adaptation;GO:0071549,biological_process,cellular response to dexamethasone stimulus;GO:0005829,cellular_component,cytosol;GO:0030018,cellular_component,Z disc;GO:0005634,cellular_component,nucleus;GO:0005654,cellular_component,nucleoplasm	K10305,ko04068,FoxO signaling pathway
AURKAPS1	1.37147	0	5.62328	0.57227	0.0336166	0.0553898	ENSG00000213033	G2HFJ0,Aurora kinase A	NP_001233545.1,aurora kinase A	PF00069,Protein kinase domain	IPR030616,Aurora kinase;IPR011009,Protein kinase-like domain superfamily;IPR017441,Protein kinase, ATP binding site;IPR008271,Serine/threonine-protein kinase, active site;IPR030611,Aurora kinase A;IPR000719,Protein kinase domain	KOG0580,Serine/threonine protein kinase;ENOG410XNRB,-	GO:0019901,molecular_function,protein kinase binding;GO:0035404,biological_process,histone-serine phosphorylation;GO:0035174,molecular_function,histone serine kinase activity;GO:0097431,cellular_component,mitotic spindle pole;GO:0004672,molecular_function,protein kinase activity;GO:0046982,molecular_function,protein heterodimerization activity;GO:0000780,cellular_component,condensed nuclear chrom…	K11481,ko04114,Oocyte meiosis
TOMM40L	1.83694	0.0974899	4.09982	2.02598	5e-05	0.000161827	ENSG00000158882	G1RVR8,Translocase of outer mitochondrial membrane 40 like	XP_012366619.1,-	PF01459,ukaryotic porin	IPR037930,Tom40;IPR027246,Eukaryotic porin/Tom40	ENOG410XS2U,-;KOG3296,Translocase of outer mitochondrial membrane complex, subunit TOM40	GO:0030150,biological_process,protein import into mitochondrial matrix;GO:0008320,molecular_function,protein transmembrane transporter activity;GO:0032991,cellular_component,protein-containing complex;GO:0055085,biological_process,transmembrane transport;GO:0005741,cellular_component,mitochondrial outer membrane;GO:0005739,cellular_component,mitochondrion	K11518,ko05014,Amyotrophic lateral sclerosis (ALS)
SRD5A1	1.26194	0.127413	3.2635	2.64203	1.51e-06	6.89e-06	ENSG00000145545	H2QQM0,Steroid-5-alpha-reductase, alpha polypeptide 1	XP_001144570.1,-	PF02544,3-oxo-5-alpha-steroid 4-dehydrogenase	IPR016636,3-oxo-5-alpha-steroid 4-dehydrogenase;IPR001104,3-oxo-5-alpha-steroid 4-dehydrogenase, C-terminal	ENOG410XS6P,-;KOG1638,Steroid reductase	GO:0003865,molecular_function,3-oxo-5-alpha-steroid 4-dehydrogenase activity;GO:0006629,biological_process,lipid metabolic process;GO:0008202,biological_process,steroid metabolic process;GO:0006702,biological_process,androgen biosynthetic process;GO:0030540,biological_process,female genitalia development;GO:0016627,molecular_function,oxidoreductase activity, acting on the CH-CH group of donors;GO…	K12343,ko00140,Steroid hormone biosynthesis
SRD5A3	2.14896	0.148264	3.78876	2.57791	5.49e-07	2.75e-06	ENSG00000128039	H2QPH7,Steroid 5 alpha-reductase 3	XP_526623.1,-;XP_016780137.1,-	PF02544,3-oxo-5-alpha-steroid 4-dehydrogenase	IPR001104,3-oxo-5-alpha-steroid 4-dehydrogenase, C-terminal	KOG1640,Predicted steroid reductase;ENOG4111JQM,-	GO:0003865,molecular_function,3-oxo-5-alpha-steroid 4-dehydrogenase activity;GO:0006629,biological_process,lipid metabolic process;GO:0016627,molecular_function,oxidoreductase activity, acting on the CH-CH group of donors;GO:0005737,cellular_component,cytoplasm;GO:0005783,cellular_component,endoplasmic reticulum;GO:0006488,biological_process,dolichol-linked oligosaccharide biosynthetic process;GO…	K12345,ko00140,Steroid hormone biosynthesis
TAB3-AS2	110.598	5.61068	4.27255	4.17786	4.71e-18	2.71e-16	ENSG00000235512	G1RGJ6,TGF-beta activated kinase 1 and MAP3K7 binding protein 3	-	PF02845,CUE domain	IPR003892,Ubiquitin system component Cue;IPR001876,Zinc finger, RanBP2-type;IPR036443,Zinc finger, RanBP2-type superfamily	ENOG410IG4E,-;ENOG410XPAC,-	GO:0046872,molecular_function,metal ion binding	K12793,ko04621,NOD-like receptor signaling pathway;K12793,ko04668,TNF signaling pathway;K12793,ko04064,NF-kappa B signaling pathway
PABPC1	3438.82	370.966	3.21253	13.1442	4.1e-47	2e-44	ENSG00000070756	A0A250YKH3,Polyadenylate-binding protein	XP_020036129.1,-	-	IPR036053,PABC (PABP) domain;IPR006515,Polyadenylate binding protein, human types 1, 2, 3, 4;IPR012677,Nucleotide-binding alpha-beta plait domain superfamily;IPR000504,RNA recognition motif domain;IPR035979,RNA-binding domain superfamily;IPR002004,Polyadenylate-binding protein/Hyperplastic disc protein;IPR003954,RNA recognition motif domain, eukaryote	-	GO:0005737,cellular_component,cytoplasm;GO:0003676,molecular_function,nucleic acid binding;GO:0003723,molecular_function,RNA binding	K13126,ko03018,RNA degradation;K13126,ko03013,RNA transport;K13126,ko03015,mRNA surveillance pathway
PDE3B	0.182552	0	5.97933	0.806972	0.00894141	0.017239	ENSG00000152270	A7E2E5,Phosphodiesterase	NP_000913.2,cGMP-inhibited 3',5'-cyclic phosphodiesterase B	PF00233,3'5'-cyclic nucleotide phosphodiesterase	IPR003607,HD/PDEase domain;IPR023174,3'5'-cyclic nucleotide phosphodiesterase, conserved site;IPR002073,3'5'-cyclic nucleotide phosphodiesterase, catalytic domain;IPR036971,3'5'-cyclic nucleotide phosphodiesterase, catalytic domain superfamily	ENOG410IEGG,-;ENOG410XT2V,-	GO:0016787,molecular_function,hydrolase activity;GO:0004114,molecular_function,3',5'-cyclic-nucleotide phosphodiesterase activity;GO:0046872,molecular_function,metal ion binding;GO:0008081,molecular_function,phosphoric diester hydrolase activity;GO:0016021,cellular_component,integral component of membrane;GO:0016020,cellular_component,membrane;GO:0007165,biological_process,signal transduction	K13296,ko00230,Purine metabolism;K13296,ko04914,Progesterone-mediated oocyte maturation;K13296,ko04924,Renin secretion;K13296,ko04923,Regulation of lipolysis in adipocytes;K13296,ko04024,cAMP signaling pathway;K13296,ko04022,cGMP-PKG signaling pathway;K13296,ko05032,Morphine addiction;K13296,ko04922,Glucagon signaling pathway;K13296,ko04910,Insulin signaling pathway
HSD17B6	1.14967	0	6.26467	1.00757	0.00242129	0.00536972	ENSG00000025423	A0A024RB43,Hydroxysteroid	XP_005269264.1,-;XP_005269265.1,-;XP_011537227.1,-;XP_005269266.1,-;XP_006719735.1,-;XP_011537229.1,-;NP_003716.2,17-beta-hydroxysteroid dehydrogenase type 6 precursor;XP_011537228.1,-	PF13561,noyl-(Acyl carrier protein) reductase;PF00106,short chain dehydrogenase	IPR036291,NAD(P)-binding domain superfamily;IPR020904,Short-chain dehydrogenase/reductase, conserved site;IPR002347,Short-chain dehydrogenase/reductase SDR	ENOG410Y7FK,-;KOG1610,Corticosteroid 11-beta-dehydrogenase and related short chain-type dehydrogenases	GO:0055114,biological_process,oxidation-reduction process;GO:0016491,molecular_function,oxidoreductase activity	K13369,ko00830,Retinol metabolism;K13369,ko00140,Steroid hormone biosynthesis
GLI2	0.614595	0.0446347	3.65025	1.67085	0.00118753	0.00282164	ENSG00000074047	H2R078,GLI family zinc finger 2	XP_009441469.1,-;XP_001158280.2,zinc finger protein GLI2 isoform X1	PF00096,Zinc finger, C2H2 type	IPR013087,Zinc finger C2H2-type;IPR036236,Zinc finger C2H2 superfamily	KOG1721,FOG: Zn-finger;COG5048,FOG: Zn-finger	GO:0021983,biological_process,pituitary gland development;GO:0009953,biological_process,dorsal/ventral pattern formation;GO:0021776,biological_process,smoothened signaling pathway involved in spinal cord motor neuron cell fate specification;GO:0021965,biological_process,spinal cord ventral commissure morphogenesis;GO:0060831,biological_process,smoothened signaling pathway involved in dorsal/ventr…	K16798,ko04340,Hedgehog signaling pathway;K16798,ko05217,Basal cell carcinoma;K16798,ko04390,Hippo signaling pathway;K16798,ko05200,Pathways in cancer
EOGT	1.13577	0.11609	3.22423	2.11897	0.000126105	0.000373122	ENSG00000163378	A0A0D9RGY5,EGF domain specific O-linked N-acetylglucosamine transferase	XP_007983122.1,-;XP_007983123.1,-;XP_007983120.1,EGF domain-specific O-linked N-acetylglucosamine transferase;XP_007983121.1,-	PF04577,Protein of unknown function (DUF563)	IPR007657,Glycosyltransferase 61	-	GO:0016757,molecular_function,transferase activity, transferring glycosyl groups;GO:0016262,molecular_function,protein N-acetylglucosaminyltransferase activity;GO:0006493,biological_process,protein O-linked glycosylation	K18134,ko00514,Other types of O-glycan biosynthesis
DLX5	6.01482	0.691638	3.08738	2.85948	1.33e-06	6.15e-06	ENSG00000105880	G3QP29,Distal-less homeobox 5	XP_004045842.1,-	PF12413,Homeobox protein distal-less-like N terminal;PF00046,Homeobox domain	IPR009057,Homeobox-like domain superfamily;IPR000047,Helix-turn-helix motif;IPR017970,Homeobox, conserved site;IPR020479,Homeobox domain, metazoa;IPR001356,Homeobox domain;IPR022135,Distal-less-like homeobox protein, N-terminal domain	-	GO:0007409,biological_process,axonogenesis;GO:0030855,biological_process,epithelial cell differentiation;GO:0060325,biological_process,face morphogenesis;GO:0048646,biological_process,anatomical structure formation involved in morphogenesis;GO:0044212,molecular_function,transcription regulatory region DNA binding;GO:0001649,biological_process,osteoblast differentiation;GO:0097376,biological_proce…	K18489,ko04550,Signaling pathways regulating pluripotency of stem cells
CH507-42P11.8	0.395273	0	5.81226	0.694588	0.0172979	0.0307366	ENSG00000275993	A0A0B4J2F2,SNF1-like kinase, isoform CRA_a	NP_001307572.1,serine/threonine-protein kinase SIK1	PF00069,Protein kinase domain	IPR015940,Ubiquitin-associated domain;IPR011009,Protein kinase-like domain superfamily;IPR017441,Protein kinase, ATP binding site;IPR008271,Serine/threonine-protein kinase, active site;IPR017090,Serine/threonine-protein kinase, SIK1/2;IPR034672,Salt-Inducible kinase, catalytic domain;IPR000719,Protein kinase domain	KOG0586,Serine/threonine protein kinase;ENOG410XNQ0,-	GO:0016301,molecular_function,kinase activity;GO:0035556,biological_process,intracellular signal transduction;GO:0005737,cellular_component,cytoplasm;GO:0032870,biological_process,cellular response to hormone stimulus;GO:0000287,molecular_function,magnesium ion binding;GO:0016310,biological_process,phosphorylation;GO:0005524,molecular_function,ATP binding;GO:0004672,molecular_function,protein kin…	K19008,ko04922,Glucagon signaling pathway
COL5A1	0.31834	0	6.70712	1.33804	0.000352487	0.000943384	ENSG00000130635	A0A024R8E5,Collagen, type V, alpha 1, isoform CRA_a	NP_000084.3,collagen alpha-1(V) chain isoform 1 preproprotein	PF01391,Collagen triple helix repeat (20 copies);PF01410,ibrillar collagen C-terminal domain	IPR008160,Collagen triple helix repeat;IPR001791,Laminin G domain;IPR013320,Concanavalin A-like lectin/glucanase domain superfamily;IPR000885,Fibrillar collagen, C-terminal	ENOG410XNMM,-;KOG3544,Collagens (type IV and type XIII), and related proteins	GO:0003007,biological_process,heart morphogenesis;GO:0005578,,;GO:0005581,cellular_component,collagen trimer;GO:0005615,cellular_component,extracellular space;GO:0005604,cellular_component,basement membrane;GO:0030199,biological_process,collagen fibril organization;GO:0005201,molecular_function,extracellular matrix structural constituent;GO:0001568,biological_process,blood vessel development;GO:0…	K19721,ko04974,Protein digestion and absorption
MYPN	1.51356	0.185645	2.99456	2.7837	4.85e-06	1.98e-05	ENSG00000138347	H2R4C7,Uncharacterized protein	XP_016773899.1,-;XP_016773900.1,-;XP_009456834.1,myopalladin isoform X3	PF07679,Immunoglobulin I-set domain	IPR007110,Immunoglobulin-like domain;IPR036179,Immunoglobulin-like domain superfamily;IPR013783,Immunoglobulin-like fold;IPR003599,Immunoglobulin subtype;IPR003598,Immunoglobulin subtype 2;IPR013098,Immunoglobulin I-set	ENOG41103YT,-;ENOG410IGH0,-	GO:0030334,biological_process,regulation of cell migration;GO:0045214,biological_process,sarcomere organization;GO:0008092,molecular_function,cytoskeletal protein binding;GO:0031674,cellular_component,I band;GO:0017124,molecular_function,SH3 domain binding;GO:0051493,biological_process,regulation of cytoskeleton organization;GO:0048739,biological_process,cardiac muscle fiber development;GO:005101…	-
PAX9	1.77062	0.217175	2.99456	2.7837	4.85e-06	1.98e-05	ENSG00000198807	G3QGP5,Paired box 9	XP_004055141.1,-	PF00292,'Paired box' domain	IPR001523,Paired domain;IPR009057,Homeobox-like domain superfamily;IPR036388,Winged helix-like DNA-binding domain superfamily;IPR033204,Paired box protein PAX9	-	GO:0003677,molecular_function,DNA binding;GO:0003700,molecular_function,DNA binding transcription factor activity;GO:0007275,biological_process,multicellular organism development;GO:0006355,biological_process,regulation of transcription, DNA-templated;GO:0006351,biological_process,transcription, DNA-templated;GO:0009887,biological_process,animal organ morphogenesis;GO:0005634,cellular_component,n…	-
PTCD2	0.882023	0.108184	2.99456	2.7837	4.85e-06	1.98e-05	ENSG00000049883	A0A024RAM6,Pentatricopeptide repeat domain 2, isoform CRA_a	NP_079030.3,pentatricopeptide repeat-containing protein 2, mitochondrial isoform 1	PF10037,Mitochondrial 28S ribosomal protein S27	IPR034629,Pentatricopeptide repeat-containing protein 2, mitochondrial;IPR034913,MRPS27/PTCD2;IPR011990,Tetratricopeptide-like helical domain superfamily;IPR002885,Pentatricopeptide repeat	ENOG410IIEH,-;ENOG4111GFQ,-	GO:0007507,biological_process,heart development;GO:0007005,biological_process,mitochondrion organization;GO:0048747,biological_process,muscle fiber development;GO:0055010,biological_process,ventricular cardiac muscle tissue morphogenesis;GO:0050684,biological_process,regulation of mRNA processing;GO:0005739,cellular_component,mitochondrion;GO:0010468,biological_process,regulation of gene expressi…	-
RP11-264B14.1	18.8197	2.29135	2.99446	2.42471	2.53e-05	8.79e-05	ENSG00000267207	G8F6G9,Uncharacterized protein	-	PF00276,Ribosomal protein L23;PF03939,Ribosomal protein L23, N-terminal domain	IPR012678,Ribosomal protein L23/L15e core domain superfamily;IPR005633,Ribosomal protein L23/L25, N-terminal;IPR019985,Ribosomal protein L23;IPR012677,Nucleotide-binding alpha-beta plait domain superfamily;IPR013025,Ribosomal protein L25/L23;IPR001014,Ribosomal protein L23/L25, conserved site	-	GO:0005840,cellular_component,ribosome;GO:0003735,molecular_function,structural constituent of ribosome;GO:0006412,biological_process,translation;GO:0030529,,;GO:0005622,cellular_component,intracellular	-
ZNF329	1.87367	0.228125	2.99446	2.42471	2.53e-05	8.79e-05	ENSG00000181894	A0A024R4Q4,Zinc finger protein 329, isoform CRA_a	XP_016882796.1,-;XP_011525618.1,-;XP_006723446.1,-;XP_016882797.1,-;XP_006723445.1,-;XP_016882798.1,-;XP_016882800.1,-;XP_006723444.1,-;XP_016882799.1,-;NP_078896.3,zinc finger protein 329;XP_006723447.1,-;XP_011525617.1,-	PF00096,Zinc finger, C2H2 type	IPR013087,Zinc finger C2H2-type;IPR036236,Zinc finger C2H2 superfamily	KOG1721,FOG: Zn-finger;COG5048,FOG: Zn-finger	GO:0003676,molecular_function,nucleic acid binding	-
HHEX	2.163	0.259535	2.99424	1.94021	0.000910749	0.00221066	ENSG00000152804	H2Q2A0,Hematopoietically expressed homeobox	XP_507925.2,-	PF00046,Homeobox domain	IPR017970,Homeobox, conserved site;IPR001356,Homeobox domain;IPR020479,Homeobox domain, metazoa;IPR009057,Homeobox-like domain superfamily	KOG0483,Transcription factor HEX, contains HOX and HALZ domains;ENOG410Z2UE,-	GO:0034504,biological_process,protein localization to nucleus;GO:0001570,biological_process,vasculogenesis;GO:0035264,biological_process,multicellular organism growth;GO:0000122,biological_process,negative regulation of transcription by RNA polymerase II;GO:0006355,biological_process,regulation of transcription, DNA-templated;GO:0044212,molecular_function,transcription regulatory region DNA bindi…	K08024,ko05202,Transcriptional misregulation in cancer;K08024,ko04950,Maturity onset diabetes of the young
ZIC2	1.65003	0.197984	2.99424	1.94021	0.000910749	0.00221066	ENSG00000043355	G1R8G5,Zic family member 2	XP_003270194.1,zinc finger protein ZIC 2	PF00096,Zinc finger, C2H2 type	IPR013087,Zinc finger C2H2-type;IPR036236,Zinc finger C2H2 superfamily	KOG1721,FOG: Zn-finger;COG5048,FOG: Zn-finger	GO:0003676,molecular_function,nucleic acid binding;GO:0016604,cellular_component,nuclear body;GO:0005634,cellular_component,nucleus	-
RP11-817O13.8	3.81929	0.458271	2.99424	1.94021	0.000910749	0.00221066	ENSG00000260274	T0NKL7,Uncharacterized protein	-	PF01074,lycosyl hydrolases family 38 N-terminal domain;PF08295,Sin3 family co-repressor;PF07748,lycosyl hydrolases family 38 C-terminal domain;PF16879,C-terminal domain of Sin3a protein;PF02671,Paired amphipathic helix repeat;PF09261,Alpha mannosidase middle domain	IPR037969,Paired amphipathic helix protein Sin3a;IPR011013,Galactose mutarotase-like domain superfamily;IPR000602,Glycoside hydrolase family 38, N-terminal domain;IPR037094,Glycoside hydrolase family 38, central domain superfamily;IPR031693,Sin3, C-terminal;IPR013194,Histone deacetylase interacting domain;IPR011330,Glycoside hydrolase/deacetylase, beta/alpha-barrel;IPR015341,Glycoside hydrolase f…	-	GO:0016580,cellular_component,Sin3 complex;GO:0005975,biological_process,carbohydrate metabolic process;GO:0006013,biological_process,mannose metabolic process;GO:0003824,molecular_function,catalytic activity;GO:1903507,biological_process,negative regulation of nucleic acid-templated transcription;GO:0006355,biological_process,regulation of transcription, DNA-templated;GO:0030246,molecular_functi…	-
GOLGA2P7	1.11121	0.133332	2.99424	1.94021	0.000910749	0.00221066	ENSG00000225151	G1M9Z8,Dynamin 1	-	PF00350,ynamin family;PF01031,ynamin central region;PF02212,ynamin GTPase effector domain;PF00169,PH domain	IPR019762,Dynamin, GTPase region, conserved site;IPR000375,Dynamin central domain;IPR020850,GTPase effector domain;IPR027417,P-loop containing nucleoside triphosphate hydrolase;IPR027741,Dynamin-1;IPR030381,Dynamin-type guanine nucleotide-binding (G) domain;IPR011993,PH-like domain superfamily;IPR022812,Dynamin superfamily;IPR003130,Dynamin GTPase effector;IPR001849,Pleckstrin homology domain;IPR…	KOG0446,Vacuolar sorting protein VPS1, dynamin, and related proteins;COG0699,Predicted GTPases (dynamin-related)	GO:0006898,biological_process,receptor-mediated endocytosis;GO:0005525,molecular_function,GTP binding;GO:0042802,molecular_function,identical protein binding;GO:0007032,biological_process,endosome organization;GO:0005634,cellular_component,nucleus;GO:0072583,biological_process,clathrin-dependent endocytosis;GO:0003924,molecular_function,GTPase activity;GO:0000166,molecular_function,nucleotide bin…	-
ARL17B	1.29452	0.155328	2.99424	1.94021	0.000910749	0.00221066	ENSG00000228696	I3L3L1,ADP-ribosylation factor-like protein 17	XP_011544691.1,-;XP_011522466.1,ADP-ribosylation factor-like protein 17 isoform X3;XP_011523179.1,-	PF15840,ADP-ribosylation factor-like protein 17;PF00025,ADP-ribosylation factor family	IPR031687,ADP-ribosylation factor-like protein 17, C-terminal;IPR006689,Small GTPase superfamily, ARF/SAR type;IPR024156,Small GTPase superfamily, ARF type;IPR027417,P-loop containing nucleoside triphosphate hydrolase	COG1100,GTPase SAR1 and related small G proteins;KOG0070,GTP-binding ADP-ribosylation factor Arf1	GO:0005525,molecular_function,GTP binding;GO:0000166,molecular_function,nucleotide binding;GO:0005622,cellular_component,intracellular	-
RP5-1033H22.2	1.4583	0.167689	2.99365	1.19073	0.00788025	0.0153829	ENSG00000224093	A0A1A6HVM9,Uncharacterized protein	-	PF00017,SH2 domain	IPR001895,Ras guanine-nucleotide exchange factors catalytic domain;IPR028849,Breast cancer anti-estrogen resistance protein 3;IPR036860,SH2 domain superfamily;IPR000980,SH2 domain;IPR023578,Ras guanine nucleotide exchange factor domain superfamily;IPR036964,Ras guanine-nucleotide exchange factor catalytic domain superfamily	-	GO:0005085,molecular_function,guanyl-nucleotide exchange factor activity;GO:0065009,biological_process,regulation of molecular function;GO:0007264,biological_process,small GTPase mediated signal transduction;GO:0007165,biological_process,signal transduction;GO:0005622,cellular_component,intracellular	-
RP11-383C5.8	5.0434	0.579935	2.99365	1.19073	0.00788025	0.0153829	ENSG00000280561	Q8N9J6,cDNA FLJ37035 fis, clone BRACE2011545	-	-	-	-	-	-
PABPC1P4	1.51974	0.174754	2.99365	1.19073	0.00788025	0.0153829	ENSG00000255642	A0A1S3ABN7,Polyadenylate-binding protein	XP_007532497.1,polyadenylate-binding protein 1 isoform X2	-	IPR036053,PABC (PABP) domain;IPR006515,Polyadenylate binding protein, human types 1, 2, 3, 4;IPR012677,Nucleotide-binding alpha-beta plait domain superfamily;IPR000504,RNA recognition motif domain;IPR035979,RNA-binding domain superfamily;IPR002004,Polyadenylate-binding protein/Hyperplastic disc protein;IPR003954,RNA recognition motif domain, eukaryote	-	GO:0003723,molecular_function,RNA binding;GO:0003676,molecular_function,nucleic acid binding;GO:0005737,cellular_component,cytoplasm	-
RP11-864J10.4	1.6625	0.191169	2.99365	1.19073	0.00788025	0.0153829	-	-	-	-	-	-	-	-
RP11-638I2.6	4.11186	0.472819	2.99365	1.19073	0.00788025	0.0153829	-	-	-	-	-	-	-	-
BEAN1	0.386166	0.0444049	2.99365	1.19073	0.00788025	0.0153829	ENSG00000166546	H2NR36,Brain expressed associated with NEDD4 1	XP_002826561.2,protein BEAN1 isoform X1	-	-	ENOG4111GT8,-;ENOG410IWAK,-	GO:0016021,cellular_component,integral component of membrane;GO:0016020,cellular_component,membrane	-
DLX4	0.781976	0.0899186	2.99365	1.19073	0.00788025	0.0153829	ENSG00000108813	H2NVL7,Distal-less homeobox 4	XP_002834328.1,-	PF00046,Homeobox domain	IPR017970,Homeobox, conserved site;IPR001356,Homeobox domain;IPR020479,Homeobox domain, metazoa;IPR009057,Homeobox-like domain superfamily;IPR000047,Helix-turn-helix motif	KOG0850,Transcription factor DLX and related proteins with LIM Zn-binding and HOX domains;ENOG410ZHZR,-	GO:0003677,molecular_function,DNA binding;GO:0001078,molecular_function,transcriptional repressor activity, RNA polymerase II proximal promoter sequence-specific DNA binding;GO:0043565,molecular_function,sequence-specific DNA binding;GO:0000122,biological_process,negative regulation of transcription by RNA polymerase II;GO:0006355,biological_process,regulation of transcription, DNA-templated;GO:0…	-
DNAAF3	0.862968	0.0992318	2.99365	1.19073	0.00788025	0.0153829	ENSG00000167646	A0A0C4DH81,Dynein assembly factor 3, axonemal	NP_001243643.1,dynein assembly factor 3, axonemal isoform 1	PF14740,omain of unknown function (DUF4471);PF14737,omain of unknown function (DUF4470)	IPR028235,Dynein assembly factor 3, C-terminal domain;IPR027974,Domain of unknown function DUF4470	ENOG410XP2W,-;ENOG410IENI,-	-	-
PIGZ	0.887425	0.102044	2.99365	1.19073	0.00788025	0.0153829	ENSG00000119227	G3QUW4,Mannosyltransferase	XP_004038318.1,GPI mannosyltransferase 4 isoform X2;XP_018880317.1,-	PF03901,Alg9-like mannosyltransferase family	IPR005599,GPI mannosyltransferase	-	GO:0016757,molecular_function,transferase activity, transferring glycosyl groups;GO:0006506,biological_process,GPI anchor biosynthetic process;GO:0097502,biological_process,mannosylation;GO:0005783,cellular_component,endoplasmic reticulum;GO:0016020,cellular_component,membrane;GO:0000026,molecular_function,alpha-1,2-mannosyltransferase activity;GO:0005789,cellular_component,endoplasmic reticulum …	K08098,ko00563,Glycosylphosphatidylinositol(GPI)-anchor biosynthesis
STX11	1.4795	0.170126	2.99365	1.19073	0.00788025	0.0153829	ENSG00000135604	H2PKI6,Syntaxin 11	XP_002817498.1,syntaxin-11	PF00804,Syntaxin	IPR000727,Target SNARE coiled-coil homology domain;IPR010989,SNARE;IPR006012,Syntaxin/epimorphin, conserved site;IPR028672,Syntaxin-11;IPR006011,Syntaxin, N-terminal domain	COG5074,t-SNARE complex subunit, syntaxin;KOG0810,SNARE protein Syntaxin 1 and related proteins	GO:0005794,cellular_component,Golgi apparatus;GO:0005484,molecular_function,SNAP receptor activity;GO:0061025,biological_process,membrane fusion;GO:0016020,cellular_component,membrane;GO:0016192,biological_process,vesicle-mediated transport;GO:0006886,biological_process,intracellular protein transport	K08487,ko04130,SNARE interactions in vesicular transport
DLL1	0.883299	0.10157	2.99365	1.19073	0.00788025	0.0153829	ENSG00000198719	H2QU26,Delta-like protein	XP_520601.2,-	PF07657,N terminus of Notch ligand;PF00008,-like domain;PF01414,elta serrate ligand;PF12661,Human growth factor-like EGF	IPR018097,EGF-like calcium-binding, conserved site;IPR001774,Delta/Serrate/lag-2 (DSL) protein;IPR009030,Growth factor receptor cysteine-rich domain superfamily;IPR011651,Notch ligand, N-terminal domain;IPR001881,EGF-like calcium-binding domain;IPR000152,EGF-type aspartate/asparagine hydroxylation site;IPR000742,EGF-like domain;IPR013032,EGF-like, conserved site	ENOG410XUNS,-;ENOG410IR7B,-	GO:0001757,biological_process,somite specification;GO:0003323,biological_process,type B pancreatic cell development;GO:0051302,biological_process,regulation of cell division;GO:0045665,biological_process,negative regulation of neuron differentiation;GO:0005912,cellular_component,adherens junction;GO:0030857,biological_process,negative regulation of epithelial cell differentiation;GO:0048631,biolo…	-
RP11-216B9.6	2.2943	0.263819	2.99365	1.19073	0.00788025	0.0153829	ENSG00000228395	I7GC03,Macaca fascicularis brain cDNA clone: QflA-17923, similar to human protocadherin 11 X-linked	-	-	-	-	-	-
ARID2	8.98773	1.13481	2.98236	5.96713	1.78e-24	3.01e-22	ENSG00000189079	G3RDG4,AT-rich interaction domain 2	XP_004053045.1,AT-rich interactive domain-containing protein 2 isoform X1	PF01388,ARID/BRIGHT DNA binding domain;PF02257,RFX DNA-binding domain	IPR013087,Zinc finger C2H2-type;IPR001606,ARID DNA-binding domain;IPR003150,DNA-binding RFX-type winged-helix domain;IPR036431,ARID DNA-binding domain superfamily;IPR036388,Winged helix-like DNA-binding domain superfamily;IPR016024,Armadillo-type fold;IPR036390,Winged helix DNA-binding domain superfamily	-	GO:0060038,biological_process,cardiac muscle cell proliferation;GO:0006337,biological_process,nucleosome disassembly;GO:0003677,molecular_function,DNA binding;GO:0072358,biological_process,cardiovascular system development;GO:0003676,molecular_function,nucleic acid binding;GO:0008285,biological_process,negative regulation of cell proliferation;GO:0003007,biological_process,heart morphogenesis;GO:…	-
MUC20	25.037	3.16173	2.98205	5.93279	3.81e-24	6.07e-22	ENSG00000176945	C9JJE7,Mucin-20	-	-	IPR034551,Mucin-20	ENOG4111Y2D,-;ENOG410IVUU,-	GO:0048012,biological_process,hepatocyte growth factor receptor signaling pathway	-
LAMTOR3	4.32665	0.542746	2.97613	3.49391	5.93e-09	4.59e-08	ENSG00000109270	A0A212CLI2,LAMTOR3	-	-	IPR015019,Ragulator complex protein LAMTOR3	-	GO:0032006,biological_process,regulation of TOR signaling	-
PANX1	5.65994	0.709997	2.97303	3.28847	1.93e-08	1.33e-07	ENSG00000110218	A0A024R397,Pannexin	NP_056183.2,pannexin-1	PF00876,Innexin	IPR000990,Innexin	ENOG410YA5H,-;ENOG410II5X,-	GO:0002931,biological_process,response to ischemia;GO:0030054,cellular_component,cell junction;GO:0050718,biological_process,positive regulation of interleukin-1 beta secretion;GO:0033198,biological_process,response to ATP;GO:0005921,cellular_component,gap junction;GO:0005243,molecular_function,gap junction channel activity;GO:0055085,biological_process,transmembrane transport;GO:0044325,molecula…	-
NECTIN3	2.53434	0.317914	2.97303	3.28847	1.93e-08	1.33e-07	ENSG00000177707	K7DHM1,Poliovirus receptor-related 3	-	PF08205,CD80-like C2-set immunoglobulin domain;PF07686,Immunoglobulin V-set domain	IPR007110,Immunoglobulin-like domain;IPR013162,CD80-like, immunoglobulin C2-set;IPR036179,Immunoglobulin-like domain superfamily;IPR013783,Immunoglobulin-like fold;IPR003599,Immunoglobulin subtype;IPR013106,Immunoglobulin V-set domain;IPR033319,Nectin-3	ENOG410ZRVN,-;ENOG410IGR7,-	GO:0007286,biological_process,spermatid development;GO:0005911,cellular_component,cell-cell junction;GO:0050839,molecular_function,cell adhesion molecule binding;GO:0007155,biological_process,cell adhesion;GO:0042803,molecular_function,protein homodimerization activity;GO:0046982,molecular_function,protein heterodimerization activity;GO:0016020,cellular_component,membrane;GO:0016021,cellular_comp…	-
SAMD10	4.25937	0.534306	2.96225	2.75749	7.46e-06	2.92e-05	ENSG00000130590	H2QKT8,Uncharacterized protein	NP_001238837.1,-	PF07647,SAM domain (Sterile alpha motif)	IPR013761,Sterile alpha motif/pointed domain superfamily;IPR001660,Sterile alpha motif domain	ENOG41128Z9,-;ENOG410IJ7W,-	-	-
RUNX1	0.670878	0.0841565	2.96225	2.75749	7.46e-06	2.92e-05	ENSG00000159216	H2RAI7,Runt-related transcription factor	-	PF00853,Runt domain;PF08504,Runx inhibition domain	IPR013524,Runt domain;IPR013711,Runx, C-terminal domain;IPR012346,p53/RUNT-type transcription factor, DNA-binding domain superfamily;IPR008967,p53-like transcription factor, DNA-binding;IPR027384,Runx, central domain superfamily;IPR016554,Runt-related transcription factor RUNX;IPR000040,Acute myeloid leukemia 1 protein (AML1)/Runt	ENOG4111J4Y,-;KOG3982,Runt and related transcription factors	GO:0030097,biological_process,hemopoiesis;GO:0003677,molecular_function,DNA binding;GO:0000981,molecular_function,RNA polymerase II transcription factor activity, sequence-specific DNA binding;GO:0006357,biological_process,regulation of transcription by RNA polymerase II;GO:0003700,molecular_function,DNA binding transcription factor activity;GO:0045595,biological_process,regulation of cell differ…	K08367,ko05200,Pathways in cancer;K08367,ko05220,Chronic myeloid leukemia;K08367,ko05202,Transcriptional misregulation in cancer;K08367,ko05221,Acute myeloid leukemia
COBL	0.728152	0.0913411	2.96225	2.75749	7.46e-06	2.92e-05	ENSG00000106078	H2QUK9,Uncharacterized protein	XP_519099.3,protein cordon-bleu isoform X9	PF02205,WH2 motif;PF09469,Cordon-bleu ubiquitin-like domain	IPR003124,WH2 domain;IPR019025,Cordon-bleu, ubiquitin-like domain	ENOG410IJC4,-;ENOG410YD9K,-	GO:0051639,biological_process,actin filament network formation;GO:0003785,molecular_function,actin monomer binding;GO:0030041,biological_process,actin filament polymerization;GO:0003779,molecular_function,actin binding	-
PABPC3	18.8594	2.41854	2.9578	5.21612	2.76e-19	2e-17	ENSG00000151846	Q5VX58,Polyadenylate-binding protein	NP_112241.2,polyadenylate-binding protein 3	PF00658,Poly-adenylate binding protein, unique domain;PF00076,RNA recognition motif. (a.k.a. RRM, RBD, or RNP domain)	IPR036053,PABC (PABP) domain;IPR006515,Polyadenylate binding protein, human types 1, 2, 3, 4;IPR012677,Nucleotide-binding alpha-beta plait domain superfamily;IPR000504,RNA recognition motif domain;IPR035979,RNA-binding domain superfamily;IPR002004,Polyadenylate-binding protein/Hyperplastic disc protein;IPR003954,RNA recognition motif domain, eukaryote	ENOG410XR5X,-;KOG0123,Polyadenylate-binding protein (RRM superfamily)	GO:0005737,cellular_component,cytoplasm;GO:0003676,molecular_function,nucleic acid binding;GO:0003723,molecular_function,RNA binding;GO:0005829,cellular_component,cytosol	K13126,ko03018,RNA degradation;K13126,ko03013,RNA transport;K13126,ko03015,mRNA surveillance pathway
ZNF248	1.0825	0.135791	2.95157	2.39067	4.05e-05	0.00013432	ENSG00000198105	A2RUI7,Zinc finger protein 248	XP_011517899.1,-;NP_001254526.1,-;XP_016871934.1,-;NP_066383.1,zinc finger protein 248 isoform 1;XP_016871935.1,-;XP_006717548.1,-	PF00096,Zinc finger, C2H2 type;PF01352,KRAB box	IPR013087,Zinc finger C2H2-type;IPR001909,Krueppel-associated box;IPR036051,KRAB domain superfamily;IPR036236,Zinc finger C2H2 superfamily	KOG1721,FOG: Zn-finger;COG5048,FOG: Zn-finger	GO:0006355,biological_process,regulation of transcription, DNA-templated;GO:0003676,molecular_function,nucleic acid binding;GO:0046872,molecular_function,metal ion binding;GO:0005622,cellular_component,intracellular	-
MIR1260B	88.047	11.0448	2.95157	2.39067	4.05e-05	0.00013432	-	-	-	-	-	-	-	-
RP3-430N8.10	77.3544	9.9292	2.94534	3.64548	9.58e-10	8.84e-09	-	-	-	-	-	-	-	-
IRF2BP1	6.94599	0.894557	2.93823	3.46231	1.25e-08	9.02e-08	ENSG00000170604	H2QGM3,Interferon regulatory factor 2 binding protein 1	XP_003316501.1,-	PF11261,Interferon regulatory factor 2-binding protein zinc finger;PF00097,Zinc finger, C3HC4 type (RING finger)	IPR022750,Interferon regulatory factor 2-binding protein 1 & 2, zinc finger;IPR018957,Zinc finger, C3HC4 RING-type	ENOG410Z1AW,-;KOG3579,Predicted E3 ubiquitin ligase	GO:0046872,molecular_function,metal ion binding;GO:0005654,cellular_component,nucleoplasm	-
SPATA2	5.33868	0.690626	2.93594	3.7951	1.2e-10	1.35e-09	ENSG00000158480	H2QKJ9,Spermatogenesis associated 2	XP_009435686.1,-;XP_003317053.1,-;XP_001167299.1,spermatogenesis-associated protein 2	-	IPR029744,Spermatogenesis-associated protein 2	ENOG410XZJ4,-;ENOG410IGAI,-	GO:0005737,cellular_component,cytoplasm;GO:0005634,cellular_component,nucleus;GO:0001650,cellular_component,fibrillar center	-
PLPP3	0.988294	0.123974	2.93052	1.89163	0.00148807	0.00345662	ENSG00000162407	G3QDI5,Uncharacterized protein	XP_004025914.1,-	PF01569,PAP2 superfamily	IPR028675,Lipid phosphate phosphohydrolase 3;IPR036938,Phosphatidic acid phosphatase type 2/haloperoxidase superfamily;IPR000326,Phosphatidic acid phosphatase type 2/haloperoxidase	-	GO:0006644,biological_process,phospholipid metabolic process;GO:0050821,biological_process,protein stabilization;GO:0007155,biological_process,cell adhesion;GO:0098609,biological_process,cell-cell adhesion;GO:0060070,biological_process,canonical Wnt signaling pathway;GO:0042392,molecular_function,sphingosine-1-phosphate phosphatase activity;GO:0060020,biological_process,Bergmann glial cell differ…	K01080,ko00600,Sphingolipid metabolism;K01080,ko04666,Fc gamma R-mediated phagocytosis;K01080,ko00564,Glycerophospholipid metabolism;K01080,ko00565,Ether lipid metabolism;K01080,ko04975,Fat digestion and absorption;K01080,ko04072,Phospholipase D signaling pathway;K01080,ko05231,Choline metabolism in cancer;K01080,ko00561,Glycerolipid metabolism
RP11-134G8.10	8.73599	1.09586	2.93052	1.89163	0.00148807	0.00345662	-	-	-	-	-	-	-	-
PAPSS2	1.27948	0.160501	2.93052	1.89163	0.00148807	0.00345662	ENSG00000198682	H2R2G5,Uncharacterized protein	-	PF01583,Adenylylsulphate kinase;PF14306,PUA-like domain;PF01747,ATP-sulfurylase	IPR014729,Rossmann-like alpha/beta/alpha sandwich fold;IPR015947,PUA-like superfamily;IPR002891,Adenylyl-sulfate kinase;IPR027417,P-loop containing nucleoside triphosphate hydrolase;IPR024951,Sulphate adenylyltransferase catalytic domain;IPR002650,Sulphate adenylyltransferase;IPR025980,ATP-sulfurylase PUA-like domain	KOG4238,Bifunctional ATP sulfurylase/adenosine 5'-phosphosulfate kinase;KOG0635,Adenosine 5'-phosphosulfate kinase;COG2046,ATP sulfurylase (sulfate adenylyltransferase);COG0529,Adenylylsulfate kinase and related kinases	GO:0000103,biological_process,sulfate assimilation;GO:0016310,biological_process,phosphorylation;GO:0050428,biological_process,3'-phosphoadenosine 5'-phosphosulfate biosynthetic process;GO:0004020,molecular_function,adenylylsulfate kinase activity;GO:0005524,molecular_function,ATP binding;GO:0004781,molecular_function,sulfate adenylyltransferase (ATP) activity	-
RP11-625H11.2	9.05394	1.13575	2.93052	1.89163	0.00148807	0.00345662	ENSG00000259756	H2PBI0,Uncharacterized protein	-	-	-	-	-	-
PLCD4	0.890425	0.111697	2.93052	1.89163	0.00148807	0.00345662	ENSG00000115556	C9JEA7,Phosphoinositide phospholipase C	XP_016860605.1,1-phosphatidylinositol 4,5-bisphosphate phosphodiesterase delta-4 isoform X2	PF09279,Phosphoinositide-specific phospholipase C, efhand-like;PF00388,Phosphatidylinositol-specific phospholipase C, X domain;PF00387,Phosphatidylinositol-specific phospholipase C, Y domain;PF00168,C2 domain;PF00169,PH domain	IPR018247,EF-Hand 1, calcium-binding site;IPR001192,Phosphoinositide phospholipase C family;IPR017946,PLC-like phosphodiesterase, TIM beta/alpha-barrel domain superfamily;IPR028387,1-phosphatidylinositol 4,5-bisphosphate phosphodiesterase delta-4;IPR001849,Pleckstrin homology domain;IPR011993,PH-like domain superfamily;IPR002048,EF-hand domain;IPR000008,C2 domain;IPR035892,C2 domain superfamily;I…	KOG0169,Phosphoinositide-specific phospholipase C;ENOG410XPSW,-	GO:0006629,biological_process,lipid metabolic process;GO:0004435,molecular_function,phosphatidylinositol phospholipase C activity;GO:0016787,molecular_function,hydrolase activity;GO:0035556,biological_process,intracellular signal transduction;GO:0007340,biological_process,acrosome reaction;GO:0004871,molecular_function,signal transducer activity;GO:0016042,biological_process,lipid catabolic proce…	-
KIAA1549L	0.828932	0.106402	2.92919	2.73076	7.46e-06	2.92e-05	ENSG00000110427	G3QNL6,KIAA1549 like	-	PF12877,omain of unknown function (DUF3827)	IPR024606,Protein of unknown function DUF3827	-	GO:0016021,cellular_component,integral component of membrane;GO:0016020,cellular_component,membrane	-
UVRAG	1.60749	0.206337	2.92919	2.73076	7.46e-06	2.92e-05	ENSG00000198382	Q6P1X0,UV radiation resistance associated protein	-	PF10186,Vacuolar sorting 38 and autophagy-related subunit 14	IPR000008,C2 domain;IPR018791,UV radiation resistance protein/autophagy-related protein 14;IPR035892,C2 domain superfamily	ENOG410YZ0H,-;KOG2896,UV radiation resistance associated protein	-	-
TET2	17.4268	2.28732	2.92843	7.35403	8.8e-32	2.62e-29	ENSG00000168769	E7EQS8,Methylcytosine dioxygenase TET2	-	PF12851,Oxygenase domain of the 2OGFeDO superfamily	IPR024779,2OGFeDO, oxygenase domain	ENOG410IE22,-;ENOG410XPWW,-	GO:0005515,molecular_function,protein binding	-
PRDM1	4.32491	0.565913	2.92211	4.05403	1.03e-11	1.47e-10	ENSG00000057657	G3QHR5,PR/SET domain 1	XP_004044513.1,PR domain zinc finger protein 1	PF00856,SET domain;PF13912,C2H2-type zinc finger;PF00096,Zinc finger, C2H2 type	IPR013087,Zinc finger C2H2-type;IPR001214,SET domain;IPR036236,Zinc finger C2H2 superfamily	-	GO:0042462,biological_process,eye photoreceptor cell development;GO:0001078,molecular_function,transcriptional repressor activity, RNA polymerase II proximal promoter sequence-specific DNA binding;GO:0003676,molecular_function,nucleic acid binding;GO:0060707,biological_process,trophoblast giant cell differentiation;GO:0000122,biological_process,negative regulation of transcription by RNA polymera…	-
TCF12	8.94938	1.17939	2.91988	5.61455	1.34e-21	1.41e-19	ENSG00000140262	A0A024R5Z0,Transcription factor 12	NP_996919.1,transcription factor 12 isoform a;NP_001309080.1,-;NP_001309091.1,-;NP_996920.1,-;NP_001309088.1,-	PF00010,Helix-loop-helix DNA-binding domain	IPR011598,Myc-type, basic helix-loop-helix (bHLH) domain;IPR036638,Helix-loop-helix DNA-binding domain superfamily	KOG3910,Helix loop helix transcription factor;ENOG410XYUA,-	GO:0046983,molecular_function,protein dimerization activity;GO:0003677,molecular_function,DNA binding;GO:0016607,cellular_component,nuclear speck;GO:0005667,cellular_component,transcription factor complex;GO:0071837,molecular_function,HMG box domain binding;GO:0035497,molecular_function,cAMP response element binding;GO:0070888,molecular_function,E-box binding;GO:0045944,biological_process,positiv…	-
LMLN	9.64374	1.2817	2.90767	5.60397	2.24e-21	2.34e-19	ENSG00000185621	H2QP23,Leishmanolysin like peptidase	-	PF01457,Leishmanolysin	IPR001577,Peptidase M8, leishmanolysin	ENOG410XSAG,-;KOG2556,Leishmanolysin-like peptidase (Peptidase M8 family)	GO:0006508,biological_process,proteolysis;GO:0007155,biological_process,cell adhesion;GO:0004222,molecular_function,metalloendopeptidase activity;GO:0016021,cellular_component,integral component of membrane;GO:0016020,cellular_component,membrane	-
TRIM9	0.849494	0.109893	2.90738	2.35576	6.48e-05	0.000204501	ENSG00000100505	G3QS61,Tripartite motif containing 9	XP_004055212.1,E3 ubiquitin-protein ligase TRIM9 isoform X5	PF00041,ibronectin type III domain;PF13920,Zinc finger, C3HC4 type (RING finger);PF00643,B-box zinc finger;PF00622,SPRY domain	IPR003961,Fibronectin type III;IPR017903,COS domain;IPR017907,Zinc finger, RING-type, conserved site;IPR001870,B30.2/SPRY domain;IPR003649,B-box, C-terminal;IPR036116,Fibronectin type III superfamily;IPR001841,Zinc finger, RING-type;IPR013320,Concanavalin A-like lectin/glucanase domain superfamily;IPR013783,Immunoglobulin-like fold;IPR013083,Zinc finger, RING/FYVE/PHD-type;IPR000315,B-box-type zi…	-	GO:0016567,biological_process,protein ubiquitination;GO:0035544,biological_process,negative regulation of SNARE complex assembly;GO:0046872,molecular_function,metal ion binding;GO:0004842,molecular_function,ubiquitin-protein transferase activity;GO:0005622,cellular_component,intracellular;GO:0008270,molecular_function,zinc ion binding	-
ARSK	1.76141	0.227861	2.90738	2.35576	6.48e-05	0.000204501	ENSG00000164291	G3QSM2,Arylsulfatase family member K	XP_004042323.1,arylsulfatase K	PF00884,Sulfatase	IPR000917,Sulfatase, N-terminal;IPR017850,Alkaline-phosphatase-like, core domain superfamily;IPR017849,Alkaline phosphatase-like, alpha/beta/alpha	-	GO:0008484,molecular_function,sulfuric ester hydrolase activity;GO:0003824,molecular_function,catalytic activity;GO:0008152,biological_process,metabolic process	-
ZNF34	3.41977	0.44239	2.90738	2.35576	6.48e-05	0.000204501	ENSG00000196378	G3QKN9,Zinc finger protein 34	XP_018887606.1,zinc finger protein 34 isoform X2	PF00096,Zinc finger, C2H2 type;PF01352,KRAB box	IPR030753,Zinc finger protein 34;IPR013087,Zinc finger C2H2-type;IPR036051,KRAB domain superfamily;IPR036236,Zinc finger C2H2 superfamily;IPR001909,Krueppel-associated box	-	GO:0006355,biological_process,regulation of transcription, DNA-templated;GO:0003676,molecular_function,nucleic acid binding;GO:0046872,molecular_function,metal ion binding;GO:0005622,cellular_component,intracellular	-
GPRC5B	2.24389	0.294882	2.90606	3.23312	6.35e-08	3.9e-07	ENSG00000167191	A0A1D5Q3V3,G protein-coupled receptor class C group 5 member B	-	-	IPR017978,GPCR family 3, C-terminal	-	GO:0004930,molecular_function,G-protein coupled receptor activity;GO:0007186,biological_process,G-protein coupled receptor signaling pathway;GO:0016021,cellular_component,integral component of membrane;GO:0016020,cellular_component,membrane	-
RP11-96D1.10	4.95036	0.650556	2.90606	3.23312	6.35e-08	3.9e-07	ENSG00000263276	G1S510,Uncharacterized protein	-	-	-	-	-	-
EXD3	1.30781	0.171866	2.89536	2.70352	1.15e-05	4.31e-05	ENSG00000187609	A0A140VJP9,Testicular tissue protein Li 125	-	PF01927,Mut7-C RNAse domain;PF01612,3'-5' exonuclease	IPR036397,Ribonuclease H superfamily;IPR037432,Exonuclease Mut-7, DEDDy 3'-5' exonuclease domain;IPR002782,Mut7-C RNAse domain;IPR012337,Ribonuclease H-like superfamily;IPR002562,3'-5' exonuclease domain	-	GO:0008408,molecular_function,3'-5' exonuclease activity;GO:0003676,molecular_function,nucleic acid binding;GO:0090305,biological_process,nucleic acid phosphodiester bond hydrolysis;GO:0006139,biological_process,nucleobase-containing compound metabolic process	-
AC007319.1	15.0026	2.00338	2.89021	3.75674	3.4e-10	3.48e-09	-	-	-	-	-	-	-	-
MYB	4.02035	0.53686	2.89021	3.75674	3.4e-10	3.48e-09	ENSG00000118513	H9YZM1,Transcriptional activator Myb isoform 1	-	PF07988,LMSTEN motif;PF09316,C-myb, C-terminal;PF00249,Myb-like DNA-binding domain	IPR015395,C-myb, C-terminal;IPR012642,Transcription regulator Wos2-domain;IPR009057,Homeobox-like domain superfamily;IPR001005,SANT/Myb domain;IPR017930,Myb domain	KOG0048,Transcription factor, Myb superfamily;COG5147,Myb superfamily proteins, including transcription factors and mRNA splicing factors	GO:0006355,biological_process,regulation of transcription, DNA-templated;GO:0003677,molecular_function,DNA binding	-
AUTS2	16.2257	2.20119	2.88005	6.60282	3.28e-27	7.24e-25	ENSG00000158321	K7ALG4,Autism susceptibility candidate 2	XP_519135.4,autism susceptibility gene 2 protein isoform X3	PF15336,Autism susceptibility gene 2 protein	IPR023246,Autism susceptibility gene 2 protein	ENOG410IGMF,-;ENOG4111MEB,-	GO:0051571,biological_process,positive regulation of histone H3-K4 methylation;GO:0003682,molecular_function,chromatin binding;GO:0045944,biological_process,positive regulation of transcription by RNA polymerase II;GO:2000620,biological_process,positive regulation of histone H4-K16 acetylation	-
ISL1	6.75633	0.909545	2.87675	3.58822	4.03e-09	3.24e-08	ENSG00000016082	L8IQ01,Insulin enhancer protein ISL-1	-	PF00046,Homeobox domain;PF00412,LIM domain	IPR017970,Homeobox, conserved site;IPR001356,Homeobox domain;IPR009057,Homeobox-like domain superfamily;IPR001781,Zinc finger, LIM-type	-	GO:0006355,biological_process,regulation of transcription, DNA-templated;GO:0043565,molecular_function,sequence-specific DNA binding;GO:0003677,molecular_function,DNA binding;GO:0005634,cellular_component,nucleus;GO:0046872,molecular_function,metal ion binding	-
RP11-458D21.1	1.06268	0.133305	2.86968	1.10609	0.0139512	0.0256914	-	-	-	-	-	-	-	-
RP11-342D11.2	3.34451	0.419543	2.86968	1.10609	0.0139512	0.0256914	ENSG00000238258	Q5JWQ4,Neuropilin-1	-	PF00431,CUB domain;PF00754,5/8 type C domain	IPR000421,Coagulation factor 5/8 C-terminal domain;IPR035914,Spermadhesin, CUB domain superfamily;IPR027146,Neuropilin-1;IPR000859,CUB domain;IPR008979,Galactose-binding-like domain superfamily;IPR014648,Neuropilin	ENOG410IE8T,-;ENOG410YRBE,-	GO:0017154,molecular_function,semaphorin receptor activity;GO:0007411,biological_process,axon guidance;GO:0071526,biological_process,semaphorin-plexin signaling pathway;GO:0048010,biological_process,vascular endothelial growth factor receptor signaling pathway;GO:0019838,molecular_function,growth factor binding;GO:0038084,biological_process,vascular endothelial growth factor signaling pathway;GO:…	-
BMS1P1	0.572695	0.0718403	2.86968	1.10609	0.0139512	0.0256914	ENSG00000204177	H2NC69,Uncharacterized protein	-	PF08142,AARP2CN (NUC121) domain	IPR037875,Ribosome biogenesis protein Bms1, N-terminal;IPR030387,Bms1/Tsr1-type G domain;IPR012948,AARP2CN;IPR027417,P-loop containing nucleoside triphosphate hydrolase	KOG1951,GTP-binding protein AARP2 involved in 40S ribosome biogenesis;COG5192,GTP-binding protein required for 40S ribosome biogenesis	GO:0042254,biological_process,ribosome biogenesis;GO:0005525,molecular_function,GTP binding;GO:0005634,cellular_component,nucleus	-
RP11-369J21.12	5.71567	0.716988	2.86968	1.10609	0.0139512	0.0256914	-	-	-	-	-	-	-	-
MFSD13A	0.7408	0.0929278	2.86968	1.10609	0.0139512	0.0256914	ENSG00000138111	G3R6J3,Major facilitator superfamily domain containing 13A	XP_004050071.1,transmembrane protein 180	PF13347,MFS/sugar transport protein	IPR036259,MFS transporter superfamily	-	GO:0016021,cellular_component,integral component of membrane;GO:0016020,cellular_component,membrane	-
RP1-267D11.6	1.2474	0.156477	2.86968	1.10609	0.0139512	0.0256914	ENSG00000277283	A0A096MYY3,Uncharacterized protein	-	PF00071,Ras family	IPR001806,Small GTPase superfamily;IPR005225,Small GTP-binding protein domain;IPR027417,P-loop containing nucleoside triphosphate hydrolase	-	GO:0005546,molecular_function,phosphatidylinositol-4,5-bisphosphate binding;GO:0036010,biological_process,protein localization to endosome;GO:0019003,molecular_function,GDP binding;GO:0019882,biological_process,antigen processing and presentation;GO:0005525,molecular_function,GTP binding;GO:0031253,cellular_component,cell projection membrane;GO:0045171,cellular_component,intercellular bridge;GO:0…	-
RP11-151A6.4	0.718586	0.0901413	2.86968	1.10609	0.0139512	0.0256914	-	-	-	-	-	-	-	-
UBL7-AS1	1.52752	0.191616	2.86968	1.10609	0.0139512	0.0256914	ENSG00000247240	Q8WZ27,Uncharacterized protein	-	-	-	ENOG410YXNP,-;ENOG410JGEY,-	-	-
CEMIP	0.342745	0.0429948	2.86968	1.10609	0.0139512	0.0256914	ENSG00000103888	G3QPF6,Cell migration inducing hyaluronan binding protein	XP_018866438.1,cell migration-inducing and hyaluronan-binding protein isoform X2	PF10162,8 domain;PF15711,Interleukin-like EMT inducer;PF13330,Mucin-2 protein WxxW repeating region	IPR025155,WxxW domain;IPR011050,Pectin lyase fold/virulence factor;IPR019316,G8 domain	-	GO:0051281,biological_process,positive regulation of release of sequestered calcium ion into cytosol;GO:0032050,molecular_function,clathrin heavy chain binding;GO:0046923,molecular_function,ER retention sequence binding;GO:0090314,biological_process,positive regulation of protein targeting to membrane;GO:0004415,molecular_function,hyalurononglucosaminidase activity;GO:0005737,cellular_component,c…	-
PRSS54	1.23677	0.155144	2.86968	1.10609	0.0139512	0.0256914	ENSG00000103023	A0A140VKC3,Testis tissue sperm-binding protein Li 40a	NP_001292102.1,-;NP_001073961.1,inactive serine protease 54 isoform 1 precursor	PF00089,Trypsin	IPR009003,Peptidase S1, PA clan;IPR001254,Serine proteases, trypsin domain	-	GO:0006508,biological_process,proteolysis;GO:0004252,molecular_function,serine-type endopeptidase activity	-
XAF1	0.394869	0.0495334	2.86968	1.10609	0.0139512	0.0256914	ENSG00000132530	H2QC14,XIAP associated factor 1	XP_016786870.1,XIAP-associated factor 1 isoform X1	-	IPR031220,XIAP-associated factor 1;IPR013083,Zinc finger, RING/FYVE/PHD-type;IPR001293,Zinc finger, TRAF-type	ENOG410IK96,-;ENOG4110HW5,-	GO:0006915,biological_process,apoptotic process;GO:0034097,biological_process,response to cytokine;GO:0046872,molecular_function,metal ion binding;GO:0035456,biological_process,response to interferon-beta;GO:0005739,cellular_component,mitochondrion;GO:0005634,cellular_component,nucleus;GO:0008270,molecular_function,zinc ion binding	-
AC005224.2	1.69945	0.213184	2.86968	1.10609	0.0139512	0.0256914	-	-	-	-	-	-	-	-
RP11-455O6.2	3.2448	0.407035	2.86968	1.10609	0.0139512	0.0256914	-	-	-	-	-	-	-	-
KC6	0.504259	0.0632555	2.86968	1.10609	0.0139512	0.0256914	-	-	-	-	-	-	-	-
SPRED3	0.44544	0.0558771	2.86968	1.10609	0.0139512	0.0256914	ENSG00000188766	K7EPU5,Sprouty-related, EVH1 domain-containing protein 3	-	PF00568,WH1 domain;PF05210,Sprouty protein (Spry)	IPR007875,Sprouty;IPR023337,c-Kit-binding domain;IPR011993,PH-like domain superfamily;IPR000697,WH1/EVH1 domain	ENOG41112SS,-;KOG4590,Signal transduction protein Enabled, contains WH1 domain	GO:0009966,biological_process,regulation of signal transduction;GO:0007275,biological_process,multicellular organism development;GO:0016020,cellular_component,membrane	-
ACP7	0.840702	0.10546	2.86968	1.10609	0.0139512	0.0256914	ENSG00000183760	K7DA91,Purple acid phosphatase	XP_016791381.1,-;XP_016791383.1,-;XP_016791382.1,-;XP_009433839.1,acid phosphatase type 7 isoform X1	PF00149,Calcineurin-like phosphoesterase;PF16656,Purple acid Phosphatase, N-terminal domain;PF14008,Iron/zinc purple acid phosphatase-like protein C	IPR029052,Metallo-dependent phosphatase-like;IPR004843,Calcineurin-like phosphoesterase domain, ApaH type;IPR015914,Purple acid phosphatase, N-terminal;IPR025733,Iron/zinc purple acid phosphatase-like C-terminal domain;IPR008963,Purple acid phosphatase-like, N-terminal	-	GO:0003993,molecular_function,acid phosphatase activity;GO:0016787,molecular_function,hydrolase activity;GO:0046872,molecular_function,metal ion binding;GO:0016311,biological_process,dephosphorylation	-
CEACAM5	0.779487	0.0977808	2.86968	1.10609	0.0139512	0.0256914	ENSG00000105388	A0A024R0K5,Carcinoembryonic antigen-related cell adhesion molecule 5	NP_001278413.1,-;NP_004354.3,carcinoembryonic antigen-related cell adhesion molecule 5 isoform 1 preproprotein	PF13927,Immunoglobulin domain;PF07686,Immunoglobulin V-set domain;PF13895,Immunoglobulin domain	IPR007110,Immunoglobulin-like domain;IPR036179,Immunoglobulin-like domain superfamily;IPR013783,Immunoglobulin-like fold;IPR003599,Immunoglobulin subtype;IPR003598,Immunoglobulin subtype 2;IPR013106,Immunoglobulin V-set domain	ENOG410YR1P,-;ENOG410IFE1,-	GO:0005886,cellular_component,plasma membrane	-
C19orf18	2.85471	0.358102	2.86968	1.10609	0.0139512	0.0256914	ENSG00000177025	H2QHB2,Uncharacterized protein	XP_016792466.1,uncharacterized protein C19orf18 homolog	-	IPR037549,Uncharacterized protein C19orf18	ENOG411140P,-;ENOG410IZPS,-	GO:0016021,cellular_component,integral component of membrane;GO:0016020,cellular_component,membrane	-
PLB1	0.317075	0.0397746	2.86968	1.10609	0.0139512	0.0256914	ENSG00000163803	B2RWP8,Phospholipase B1	NP_694566.4,phospholipase B1, membrane-associated isoform 1 precursor;NP_001164056.1,phospholipase B1, membrane-associated isoform 2 precursor	PF00657,SL-like Lipase/Acylhydrolase	IPR001087,GDSL lipase/esterase;IPR035547,Phospholipase B;IPR008265,Lipase, GDSL, active site;IPR036514,SGNH hydrolase superfamily	ENOG4111FH4,-;KOG3670,Phospholipase	GO:0006629,biological_process,lipid metabolic process;GO:0016788,molecular_function,hydrolase activity, acting on ester bonds;GO:0016298,molecular_function,lipase activity;GO:0016021,cellular_component,integral component of membrane;GO:0016020,cellular_component,membrane	K14621,ko00565,Ether lipid metabolism;K14621,ko00590,Arachidonic acid metabolism;K14621,ko00591,Linoleic acid metabolism;K14621,ko00564,Glycerophospholipid metabolism;K14621,ko04977,Vitamin digestion and absorption;K14621,ko00592,alpha-Linolenic acid metabolism
ACYP2	0.526201	0.0660079	2.86968	1.10609	0.0139512	0.0256914	ENSG00000170634	U3KQL2,Acylphosphatase	NP_001307515.1,acylphosphatase-2 isoform 1	PF00708,Acylphosphatase	IPR017968,Acylphosphatase, conserved site;IPR001792,Acylphosphatase-like domain;IPR036046,Acylphosphatase-like domain superfamily;IPR020456,Acylphosphatase	KOG3360,Acylphosphatase;ENOG41126ER,-	GO:0016787,molecular_function,hydrolase activity;GO:0003998,molecular_function,acylphosphatase activity	-
PKI55	0.829753	0.104086	2.86968	1.10609	0.0139512	0.0256914	ENSG00000260804	Q9NT46,Uncharacterized protein DKFZp434H1419	-	-	-	-	-	-
DNAH1	0.188297	0.0236205	2.86968	1.10609	0.0139512	0.0256914	ENSG00000114841	A0A140VJI6,Testicular tissue protein Li 60	NP_056327.4,dynein heavy chain 1, axonemal;XP_016861619.1,-	PF12774,Hydrolytic ATP binding site of dynein motor region D1;PF12777,Microtubule-binding stalk of dynein motor;PF07728,AAA domain (dynein-related subfamily);PF03028,ynein heavy chain and region D6 of dynein motor;PF12780,P-loop containing dynein motor region D4;PF08393,ynein heavy chain, N-terminal region 2;PF12781,ATP-binding dynein motor region D5;PF12775,P-loop containing dynein motor region …	IPR035699,Dynein heavy chain, hydrolytic ATP-binding dynein motor region D1;IPR024743,Dynein heavy chain, coiled coil stalk;IPR026983,Dynein heavy chain;IPR027417,P-loop containing nucleoside triphosphate hydrolase;IPR004273,Dynein heavy chain domain;IPR013602,Dynein heavy chain, domain-2;IPR035706,Dynein heavy chain, ATP-binding dynein motor region D5;IPR011704,ATPase, dynein-related, AAA domain…	-	GO:0005858,cellular_component,axonemal dynein complex;GO:0003777,molecular_function,microtubule motor activity;GO:0003341,biological_process,cilium movement;GO:0016887,molecular_function,ATPase activity;GO:0007018,biological_process,microtubule-based movement;GO:0030286,cellular_component,dynein complex;GO:0005524,molecular_function,ATP binding	K10408,ko05016,Huntington's disease
RP11-561O4.1	1.47076	0.184495	2.86968	1.10609	0.0139512	0.0256914	ENSG00000239455	A0A1U7R481,Tyrosine-protein phosphatase non-receptor type	XP_005080709.1,tyrosine-protein phosphatase non-receptor type 11 isoform X2	-	IPR029021,Protein-tyrosine phosphatase-like;IPR036860,SH2 domain superfamily;IPR000242,PTP type protein phosphatase;IPR016130,Protein-tyrosine phosphatase, active site;IPR000980,SH2 domain;IPR003595,Protein-tyrosine phosphatase, catalytic;IPR000387,Tyrosine specific protein phosphatases domain;IPR012152,Protein-tyrosine phosphatase, non-receptor type-6, -11	-	GO:0016787,molecular_function,hydrolase activity;GO:0004721,molecular_function,phosphoprotein phosphatase activity;GO:0004725,molecular_function,protein tyrosine phosphatase activity;GO:0035335,biological_process,peptidyl-tyrosine dephosphorylation;GO:0005737,cellular_component,cytoplasm;GO:0006470,biological_process,protein dephosphorylation;GO:0016311,biological_process,dephosphorylation;GO:001…	-
RP11-211G3.3	3.64304	0.456992	2.86968	1.10609	0.0139512	0.0256914	ENSG00000228804	H2RIH4,Uncharacterized protein	-	-	-	-	-	-
PARM1	0.518884	0.0650901	2.86968	1.10609	0.0139512	0.0256914	ENSG00000169116	G3R7B8,Prostate androgen-regulated mucin-like protein 1	XP_004038883.1,prostate androgen-regulated mucin-like protein 1 isoform X2	PF17061,PARM	IPR031431,Prostate androgen-regulated mucin-like protein 1	-	GO:0005794,cellular_component,Golgi apparatus;GO:0005770,cellular_component,late endosome;GO:0043231,cellular_component,intracellular membrane-bounded organelle;GO:0005886,cellular_component,plasma membrane;GO:0005769,cellular_component,early endosome;GO:0016020,cellular_component,membrane;GO:0005829,cellular_component,cytosol;GO:0005634,cellular_component,nucleus;GO:0016021,cellular_component,in…	-
RP1-151F17.1	3.74221	0.469432	2.86968	1.10609	0.0139512	0.0256914	-	-	-	-	-	-	-	-
RP5-981O7.2	3.88122	0.48687	2.86968	1.10609	0.0139512	0.0256914	ENSG00000229591	G1QXD4,Polypeptide N-acetylgalactosaminyltransferase	XP_012367499.1,-;XP_012367498.1,polypeptide N-acetylgalactosaminyltransferase 11 isoform X1	PF00535,lycosyl transferase family 2;PF00652,Ricin-type beta-trefoil lectin domain	IPR035992,Ricin B-like lectins;IPR000772,Ricin B, lectin domain;IPR029044,Nucleotide-diphospho-sugar transferases;IPR001173,Glycosyltransferase 2-like	ENOG410XPMK,-;KOG3736,Polypeptide N-acetylgalactosaminyltransferase	GO:0018243,biological_process,protein O-linked glycosylation via threonine;GO:0016757,molecular_function,transferase activity, transferring glycosyl groups;GO:0006486,biological_process,protein glycosylation;GO:0016740,molecular_function,transferase activity;GO:0005794,cellular_component,Golgi apparatus;GO:0030246,molecular_function,carbohydrate binding;GO:0004653,molecular_function,polypeptide N…	-
TMX2P1	3.68935	0.462801	2.86968	1.10609	0.0139512	0.0256914	ENSG00000213839	K7AYW1,Thioredoxin-related transmembrane protein 2	-	PF00085,Thioredoxin	IPR013766,Thioredoxin domain;IPR036249,Thioredoxin-like superfamily;IPR037463,Thioredoxin-related transmembrane protein 2, thioredoxin domain	-	GO:0045454,biological_process,cell redox homeostasis;GO:0005623,cellular_component,cell;GO:0016021,cellular_component,integral component of membrane	-
PLCXD1	0.421913	0.0529258	2.86968	1.10609	0.0139512	0.0256914	ENSG00000182378	K7ARN9,Phosphatidylinositol-specific phospholipase C, X domain containing 1	-	PF00388,Phosphatidylinositol-specific phospholipase C, X domain	IPR000909,Phosphatidylinositol-specific phospholipase C, X domain;IPR017946,PLC-like phosphodiesterase, TIM beta/alpha-barrel domain superfamily	-	GO:0006629,biological_process,lipid metabolic process;GO:0008081,molecular_function,phosphoric diester hydrolase activity	-
NCOA6	32.4265	4.44499	2.86606	7.68945	4.52e-32	1.4e-29	ENSG00000198646	G1RGH1,Nuclear receptor coactivator 6	-	PF13820,Putative nucleic acid-binding region	IPR032715,Nuclear receptor coactivator 6, putative nucleic acid-binding region	ENOG410XW4F,-;ENOG410IK20,-	GO:0019899,molecular_function,enzyme binding;GO:0006974,biological_process,cellular response to DNA damage stimulus;GO:0003713,molecular_function,transcription coactivator activity;GO:0045944,biological_process,positive regulation of transcription by RNA polymerase II;GO:0030099,biological_process,myeloid cell differentiation;GO:0043231,cellular_component,intracellular membrane-bounded organelle;…	-
SYNC	1.43007	0.187934	2.86386	1.84127	0.0024261	0.00536972	ENSG00000162520	K7CJH9,Syncoilin, intermediate filament protein	XP_016813872.1,syncoilin isoform X1	PF00038,Intermediate filament protein	IPR001664,Intermediate filament protein;IPR027702,Syncoilin	ENOG410IKIK,-;ENOG410Y2YI,-	GO:0005882,cellular_component,intermediate filament;GO:0005198,molecular_function,structural molecule activity	-
ELP4	2.24726	0.295325	2.86386	1.84127	0.0024261	0.00536972	ENSG00000109911	G5E9D4,Elongation protein 4 homolog	NP_001275655.1,elongator complex protein 4 isoform 3	PF05625,PAXNEB protein	IPR008728,Elongator complex protein 4	KOG3949,RNA polymerase II elongator complex, subunit ELP4;ENOG410XP5H,-	GO:0033588,cellular_component,Elongator holoenzyme complex;GO:0002098,biological_process,tRNA wobble uridine modification;GO:0005654,cellular_component,nucleoplasm	-
CTD-2562J17.6	2.13288	0.280294	2.86386	1.84127	0.0024261	0.00536972	-	-	-	-	-	-	-	-
ARHGAP42	0.718125	0.0943731	2.86386	1.84127	0.0024261	0.00536972	ENSG00000165895	G3R6Z3,Rho GTPase activating protein 42	XP_018893191.1,-	PF14604,Variant SH3 domain;PF16746,BAR domain of APPL family;PF00620,RhoGAP domain;PF00169,PH domain	IPR001849,Pleckstrin homology domain;IPR011993,PH-like domain superfamily;IPR027267,AH/BAR domain superfamily;IPR001452,SH3 domain;IPR008936,Rho GTPase activation protein;IPR036028,SH3-like domain superfamily;IPR000198,Rho GTPase-activating protein domain	-	GO:0005096,molecular_function,GTPase activator activity;GO:0007165,biological_process,signal transduction;GO:0090630,biological_process,activation of GTPase activity	-
RP11-860B13.1	7.34413	0.965135	2.86386	1.84127	0.0024261	0.00536972	ENSG00000256747	A0A096NGJ6,Kelch like family member 42	XP_003906207.1,kelch-like protein 42	PF01344,Kelch motif;PF07707,BTB And C-terminal Kelch	IPR006652,Kelch repeat type 1;IPR011705,BTB/Kelch-associated;IPR000210,BTB/POZ domain;IPR015915,Kelch-type beta propeller;IPR011333,SKP1/BTB/POZ domain superfamily	-	GO:0043161,biological_process,proteasome-mediated ubiquitin-dependent protein catabolic process;GO:0000209,biological_process,protein polyubiquitination;GO:0004842,molecular_function,ubiquitin-protein transferase activity;GO:0032886,biological_process,regulation of microtubule-based process;GO:0031463,cellular_component,Cul3-RING ubiquitin ligase complex	-
CHADL	1.91869	0.252146	2.86386	1.84127	0.0024261	0.00536972	ENSG00000100399	H2R6Z0,Uncharacterized protein	XP_016794744.1,chondroadherin-like protein isoform X3	PF13855,Leucine rich repeat	IPR001611,Leucine-rich repeat;IPR000372,Leucine-rich repeat N-terminal domain;IPR003591,Leucine-rich repeat, typical subtype;IPR000483,Cysteine-rich flanking region, C-terminal;IPR032675,Leucine-rich repeat domain superfamily	KOG0619,FOG: Leucine rich repeat;COG4886,Leucine-rich repeat (LRR) protein	GO:0098633,molecular_function,collagen fibril binding;GO:0031012,cellular_component,extracellular matrix;GO:0005518,molecular_function,collagen binding;GO:1904027,biological_process,negative regulation of collagen fibril organization;GO:0032331,biological_process,negative regulation of chondrocyte differentiation	-
ALG1L6P	6.57871	0.864547	2.86386	1.84127	0.0024261	0.00536972	ENSG00000238278	H2QAJ3,ALG1, chitobiosyldiphosphodolichol beta-mannosyltransferase	XP_510796.2,chitobiosyldiphosphodolichol beta-mannosyltransferase	PF00534,lycosyl transferases group 1	IPR026051,Chitobiosyldiphosphodolichol beta-mannosyltransferase ALG1-like;IPR001296,Glycosyl transferase, family 1	KOG2941,Beta-1,4-mannosyltransferase;COG0438,Glycosyltransferase	GO:0097502,biological_process,mannosylation;GO:0006486,biological_process,protein glycosylation;GO:0016757,molecular_function,transferase activity, transferring glycosyl groups;GO:0005783,cellular_component,endoplasmic reticulum;GO:0000030,molecular_function,mannosyltransferase activity	K03842,ko00510,N-Glycan biosynthesis;K03842,ko00513,Various types of N-glycan biosynthesis
RP11-22C11.2	2.28432	0.300196	2.86386	1.84127	0.0024261	0.00536972	ENSG00000261437	B0YJ83,Protein tyrosine phosphatase-like, member A variant 4	-	-	-	COG5198,Protein tyrosine phosphatase-like protein (contains Pro instead of catalytic Arg);KOG3187,Protein tyrosine phosphatase-like protein PTPLA (contains Pro instead of catalytic Arg)	-	-
MAN1B1-AS1	2.66382	0.350068	2.86386	1.84127	0.0024261	0.00536972	ENSG00000268996	Q8WUC7,Uncharacterized protein	-	-	-	ENOG4110NXA,-;ENOG410KCIR,-	-	-
BBS10	2.04764	0.273433	2.86178	2.31994	0.000103608	0.000312415	ENSG00000179941	B7Z8Z2,cDNA FLJ61630, highly similar to Bardet-Biedl syndrome 10 protein	-	PF00118,TCP-1/cpn60 chaperonin family	IPR027410,TCP-1-like chaperonin intermediate domain superfamily;IPR027413,GroEL-like equatorial domain superfamily;IPR027409,GroEL-like apical domain superfamily;IPR002423,Chaperonin Cpn60/TCP-1 family	KOG0360,Chaperonin complex component, TCP-1 alpha subunit (CCT1);COG0459,Chaperonin GroEL (HSP60 family)	GO:0005524,molecular_function,ATP binding	-
SIX1	1.35567	0.18103	2.86178	2.31994	0.000103608	0.000312415	ENSG00000126778	H2Q8E8,SIX homeobox 1	XP_509988.2,-	PF16878,Transcriptional regulator, SIX1, N-terminal SD domain;PF00046,Homeobox domain	IPR031278,Homeobox protein SIX1;IPR017970,Homeobox, conserved site;IPR001356,Homeobox domain;IPR031701,Homeobox protein SIX1, N-terminal SD domain;IPR009057,Homeobox-like domain superfamily	KOG0775,Transcription factor SIX and related HOX domain proteins;ENOG410XRPB,-	GO:0042474,biological_process,middle ear morphogenesis;GO:0072107,biological_process,positive regulation of ureteric bud formation;GO:0050678,biological_process,regulation of epithelial cell proliferation;GO:0030855,biological_process,epithelial cell differentiation;GO:0034504,biological_process,protein localization to nucleus;GO:0060037,biological_process,pharyngeal system development;GO:0051451…	K15614,ko05202,Transcriptional misregulation in cancer
RNF166	1.6753	0.223712	2.86178	2.31994	0.000103608	0.000312415	ENSG00000158717	G3RA09,Ring finger protein 166	XP_004058177.1,-	PF05605,rought induced 19 protein (Di19), zinc-binding;PF13923,Zinc finger, C3HC4 type (RING finger)	IPR001841,Zinc finger, RING-type;IPR013083,Zinc finger, RING/FYVE/PHD-type;IPR017907,Zinc finger, RING-type, conserved site;IPR008598,Drought induced 19 protein type, zinc-binding domain;IPR034734,Zinc finger C2HC RNF-type	-	-	-
TRMT10A	1.68104	0.224478	2.86178	2.31994	0.000103608	0.000312415	ENSG00000145331	V9HVY8,Epididymis secretory protein Li 88	NP_001128137.1,-;NP_001128138.1,-;NP_689505.1,tRNA methyltransferase 10 homolog A;XP_006714480.1,-;XP_005263409.1,-	PF01746,tRNA (Guanine-1)-methyltransferase	IPR028564,tRNA methyltransferase TRM10-type domain;IPR016653,tRNA (guanine(9)-N(1))-methyltransferase TRM10/TRM10A;IPR007356,tRNA (guanine-N1-)-methyltransferase, eukaryotic;IPR038459,tRNA methyltransferase TRM10-type domain superfamily;IPR016009,tRNA methyltransferase TRMD/TRM10-type domain	ENOG4111JE4,-;KOG2967,Uncharacterized conserved protein	GO:0005730,cellular_component,nucleolus;GO:0015629,cellular_component,actin cytoskeleton;GO:0016740,molecular_function,transferase activity;GO:0008168,molecular_function,methyltransferase activity;GO:0032259,biological_process,methylation;GO:0005829,cellular_component,cytosol;GO:0005654,cellular_component,nucleoplasm	-
HUS1	1.76233	0.235334	2.86178	2.31994	0.000103608	0.000312415	ENSG00000136273	H2QUJ9,HUS1 checkpoint clamp component	XP_016812923.1,-;XP_016801187.1,-;XP_016801186.1,-;XP_519090.2,-	PF04005,Hus1-like protein	IPR016580,Cell cycle checkpoint, Hus1;IPR007150,Checkpoint protein Hus1/Mec3	KOG3999,Checkpoint 9-1-1 complex, HUS1 component;ENOG410ZQ9J,-	GO:0031573,biological_process,intra-S DNA damage checkpoint;GO:0035861,cellular_component,site of double-strand break;GO:0005730,cellular_component,nucleolus;GO:0033314,biological_process,mitotic DNA replication checkpoint;GO:0005634,cellular_component,nucleus;GO:0006289,biological_process,nucleotide-excision repair;GO:0044778,biological_process,meiotic DNA integrity checkpoint;GO:0000077,biologi…	-
TMCC3	1.49438	0.201175	2.86072	2.67572	1.76e-05	6.36e-05	ENSG00000057704	H2Q6M3,Transmembrane and coiled-coil domain family 3	XP_001141714.1,-	PF10267,Predicted transmembrane and coiled-coil 2 protein	IPR019394,Testis-specific protein TEX28/transmembrane and coiled-coil domains protein	ENOG410Y9KV,-;KOG3850,Predicted membrane protein	GO:0016021,cellular_component,integral component of membrane;GO:0016020,cellular_component,membrane	-
ATL1	2.233	0.300609	2.86072	2.67572	1.76e-05	6.36e-05	ENSG00000198513	A0A0S2Z5B0,Atlastin GTPase 1 isoform 1	NP_056999.2,atlastin-1 isoform a	PF02263,uanylate-binding protein, N-terminal domain	IPR030386,GB1/RHD3-type guanine nucleotide-binding (G) domain;IPR015894,Guanylate-binding protein, N-terminal;IPR036543,Guanylate-binding protein, C-terminal domain superfamily;IPR027417,P-loop containing nucleoside triphosphate hydrolase	-	GO:0005794,cellular_component,Golgi apparatus;GO:0007409,biological_process,axonogenesis;GO:0005525,molecular_function,GTP binding;GO:0000137,cellular_component,Golgi cis cisterna;GO:0005783,cellular_component,endoplasmic reticulum;GO:0005737,cellular_component,cytoplasm;GO:0071782,cellular_component,endoplasmic reticulum tubular network;GO:0016020,cellular_component,membrane;GO:0003924,molecular…	-
ZBED3	1.49461	0.201206	2.86072	2.67572	1.76e-05	6.36e-05	ENSG00000132846	Q53EL5,Zinc finger, BED domain containing 3 variant	-	PF02892,BED zinc finger	IPR033546,Zinc finger BED domain-containing protein 3;IPR003656,Zinc finger, BED-type;IPR036236,Zinc finger C2H2 superfamily	ENOG410IXJY,-;ENOG41115R7,-	GO:0001933,biological_process,negative regulation of protein phosphorylation;GO:0090263,biological_process,positive regulation of canonical Wnt signaling pathway;GO:0003677,molecular_function,DNA binding;GO:0050821,biological_process,protein stabilization	-
MUC20P1	7.20861	0.975189	2.86007	2.95918	1.19e-06	5.54e-06	ENSG00000224769	A0A0G2JN31,Mucin-20	NP_065841.1,mucin-20 isoform d precursor	-	IPR034551,Mucin-20	-	GO:0048012,biological_process,hepatocyte growth factor receptor signaling pathway	-
RFX2	2.37617	0.324277	2.85889	3.73057	6.81e-10	6.52e-09	ENSG00000087903	K7CLK7,Regulatory factor X, 2	-	PF04589,RFX1 transcription activation region;PF02257,RFX DNA-binding domain	IPR007668,RFX1 transcription activation region;IPR003150,DNA-binding RFX-type winged-helix domain;IPR036388,Winged helix-like DNA-binding domain superfamily;IPR036390,Winged helix DNA-binding domain superfamily	ENOG410XSHE,-;KOG3712,RFX family transcription factor	GO:0006355,biological_process,regulation of transcription, DNA-templated;GO:0003677,molecular_function,DNA binding;GO:0005634,cellular_component,nucleus	-
TMEM184C	14.5137	2.0166	2.84292	5.3247	5.31e-19	3.57e-17	ENSG00000164168	K7C5E2,Transmembrane protein 184C	XP_016807835.1,-;XP_016807834.1,-	PF03619,Organic solute transporter Ostalpha	IPR005178,Organic solute transporter subunit alpha/Transmembrane protein 184	KOG2641,Predicted seven transmembrane receptor - rhodopsin family;ENOG410XQ3V,-	GO:0016021,cellular_component,integral component of membrane;GO:0016020,cellular_component,membrane	-
KDM6A	2.66099	0.367181	2.84119	3.55868	5.79e-09	4.48e-08	ENSG00000147050	A0A087X0R0,Lysine-specific demethylase 6A	-	PF02373,JmjC domain, hydroxylase;PF13432,Tetratricopeptide repeat;PF13181,Tetratricopeptide repeat	IPR011990,Tetratricopeptide-like helical domain superfamily;IPR029516,Histone demethylase UTY;IPR013026,Tetratricopeptide repeat-containing domain;IPR019734,Tetratricopeptide repeat;IPR003347,JmjC domain	KOG1246,DNA-binding protein jumonji/RBP2/SMCY, contains JmjC domain;KOG1124,FOG: TPR repeat;COG0457,FOG: TPR repeat	GO:0010468,biological_process,regulation of gene expression;GO:0071557,biological_process,histone H3-K27 demethylation;GO:0046872,molecular_function,metal ion binding;GO:0071558,molecular_function,histone demethylase activity (H3-K27 specific)	-
ZHX3	3.24896	0.451133	2.84023	4.49632	6.92e-14	1.63e-12	ENSG00000174306	F7AY25,Uncharacterized protein	-	PF11569,Homeodomain leucine-zipper encoding, Homez;PF00046,Homeobox domain	IPR013087,Zinc finger C2H2-type;IPR036236,Zinc finger C2H2 superfamily;IPR001356,Homeobox domain;IPR009057,Homeobox-like domain superfamily;IPR024578,Homez, homeobox domain	ENOG410IHET,-;ENOG410Z8A2,-	GO:0003677,molecular_function,DNA binding;GO:0003676,molecular_function,nucleic acid binding;GO:0042803,molecular_function,protein homodimerization activity;GO:0003700,molecular_function,DNA binding transcription factor activity;GO:0045892,biological_process,negative regulation of transcription, DNA-templated;GO:0045669,biological_process,positive regulation of osteoblast differentiation;GO:00469…	-
FUNDC1	11.8815	1.63949	2.83889	3.38003	5.56e-08	3.47e-07	ENSG00000069509	H2R4R7,FUN14 domain containing 1	-	PF04930,UN14 family	IPR007014,FUN14	KOG4099,Predicted membrane protein;ENOG41122V1,-	GO:0000422,biological_process,autophagy of mitochondrion;GO:0031307,cellular_component,integral component of mitochondrial outer membrane	-
POM121B	5.72883	0.790503	2.83584	3.17547	2.1e-07	1.15e-06	ENSG00000205578	B4DET5,cDNA FLJ59484, highly similar to Nuclear envelope pore membrane protein POM 121	NP_001092885.2,nuclear envelope pore membrane protein POM 121C	PF15229,POM121 family	IPR026090,Nuclear pore protein POM121;IPR026054,Nuclear pore complex protein	ENOG410IM0V,-;ENOG4112BJY,-	-	K14316,ko03013,RNA transport
S100A11	5472.76	766.636	2.83557	11.0516	7.74e-38	2.83e-35	ENSG00000163191	H2N5T5,Protein S100	XP_002810252.1,-	PF00036,hand;PF01023,S-100/ICaBP type calcium binding domain	IPR018247,EF-Hand 1, calcium-binding site;IPR013787,S100/CaBP-9k-type, calcium binding, subdomain;IPR028482,Protein S100-A11;IPR002048,EF-hand domain;IPR001751,S100/Calbindin-D9k, conserved site;IPR011992,EF-hand domain pair	ENOG410J1U7,-;ENOG410YYVE,-	GO:0042127,biological_process,regulation of cell proliferation;GO:0001726,cellular_component,ruffle;GO:0005737,cellular_component,cytoplasm;GO:0005913,cellular_component,cell-cell adherens junction;GO:0042803,molecular_function,protein homodimerization activity;GO:0046872,molecular_function,metal ion binding;GO:0005509,molecular_function,calcium ion binding;GO:0098609,biological_process,cell-cell…	-
CDK17	4.31614	0.600575	2.83451	4.09822	1.5e-11	2.08e-10	ENSG00000059758	H2Q6N5,Cyclin-dependent kinase 17	XP_001147273.1,-	PF00069,Protein kinase domain	IPR011009,Protein kinase-like domain superfamily;IPR017441,Protein kinase, ATP binding site;IPR008271,Serine/threonine-protein kinase, active site;IPR000719,Protein kinase domain	ENOG410XPP3,-;KOG0594,Protein kinase PCTAIRE and related kinases	GO:0016301,molecular_function,kinase activity;GO:0004693,molecular_function,cyclin-dependent protein serine/threonine kinase activity;GO:0016310,biological_process,phosphorylation;GO:0005737,cellular_component,cytoplasm;GO:0005524,molecular_function,ATP binding;GO:0004672,molecular_function,protein kinase activity;GO:0006468,biological_process,protein phosphorylation;GO:0005634,cellular_component…	-
SEC24B	13.9227	1.94627	2.83446	5.41094	1.42e-19	1.1e-17	ENSG00000138802	K7DTQ4,SEC24 family, member B	XP_016807495.1,protein transport protein Sec24B isoform X3	PF04815,Sec23/Sec24 helical domain;PF04811,Sec23/Sec24 trunk domain;PF08033,Sec23/Sec24 beta-sandwich domain;PF00626,elsolin repeat;PF04810,Sec23/Sec24 zinc finger	IPR007123,Gelsolin-like domain;IPR036180,Gelsolin-like domain superfamily;IPR036465,von Willebrand factor A-like domain superfamily;IPR006900,Sec23/Sec24, helical domain;IPR029006,ADF-H/Gelsolin-like domain superfamily;IPR006895,Zinc finger, Sec23/Sec24-type;IPR036175,Sec23/Sec24 helical domain superfamily;IPR006896,Sec23/Sec24, trunk domain;IPR012990,Sec23/Sec24 beta-sandwich;IPR036174,Zinc fing…	COG5028,Vesicle coat complex COPII, subunit SEC24/subunit SFB2/subunit SFB3;KOG1985,Vesicle coat complex COPII, subunit SEC24/subunit SFB2	GO:0006888,biological_process,ER to Golgi vesicle-mediated transport;GO:0015031,biological_process,protein transport;GO:0008270,molecular_function,zinc ion binding;GO:0030127,cellular_component,COPII vesicle coat;GO:0006886,biological_process,intracellular protein transport	-
USP42	12.2558	1.7143	2.83425	5.65956	7.41e-21	7.05e-19	ENSG00000106346	A4D2N6,Ubiquitin specific protease 42	-	PF00443,Ubiquitin carboxyl-terminal hydrolase	IPR018200,Ubiquitin specific protease, conserved site;IPR028889,Ubiquitin specific protease domain;IPR001394,Peptidase C19, ubiquitin carboxyl-terminal hydrolase	KOG1865,Ubiquitin carboxyl-terminal hydrolase;ENOG410XQ92,-	GO:0006508,biological_process,proteolysis;GO:0036459,molecular_function,thiol-dependent ubiquitinyl hydrolase activity;GO:0006511,biological_process,ubiquitin-dependent protein catabolic process;GO:0008233,molecular_function,peptidase activity;GO:0016579,biological_process,protein deubiquitination	-
RP1-151F17.2	4.6781	0.645515	2.83158	2.93609	1.8e-06	8.07e-06	-	-	-	-	-	-	-	-
AC005262.3	21.0142	2.89968	2.82522	2.64735	2.71e-05	9.36e-05	ENSG00000267139	A0A1S3MXA0,guanine nucleotide-binding protein subunit alpha-11-like isoform X2	XP_014005881.1,guanine nucleotide-binding protein subunit alpha-11-like isoform X2;XP_014007371.1,-	-	IPR011025,G protein alpha subunit, helical insertion;IPR000654,G-protein alpha subunit, group Q;IPR001019,Guanine nucleotide binding protein (G-protein), alpha subunit;IPR027417,P-loop containing nucleoside triphosphate hydrolase	-	GO:0001664,molecular_function,G-protein coupled receptor binding;GO:0005525,molecular_function,GTP binding;GO:0004871,molecular_function,signal transducer activity;GO:0019001,molecular_function,guanyl nucleotide binding;GO:0031683,molecular_function,G-protein beta/gamma-subunit complex binding;GO:0007186,biological_process,G-protein coupled receptor signaling pathway;GO:0003924,molecular_function…	-
SCMH1	25.097	3.53673	2.82432	6.01862	4.89e-23	6.34e-21	ENSG00000010803	H2RC67,Sex comb on midleg homolog 1	-	PF02820,mbt repeat;PF00536,SAM domain (Sterile alpha motif);PF17208,RNA binding Region;PF12140,SLED domain	IPR013761,Sterile alpha motif/pointed domain superfamily;IPR004092,Mbt repeat;IPR038348,SLED domain superfamily;IPR021987,SLED domain;IPR033763,Polycomb group protein, RNA binding region;IPR001660,Sterile alpha motif domain	ENOG410XPKI,-;ENOG410IMEZ,-	GO:0006355,biological_process,regulation of transcription, DNA-templated;GO:0005634,cellular_component,nucleus	-
COX10	42.2967	5.99132	2.81736	6.28092	1.78e-24	3.01e-22	ENSG00000006695	H2QCB0,Protoheme IX farnesyltransferase, mitochondrial	-	PF01040,UbiA prenyltransferase family	IPR000537,UbiA prenyltransferase family;IPR006369,Protohaem IX farnesyltransferase;IPR030470,UbiA prenyltransferase conserved site	KOG1380,Heme A farnesyltransferase;COG0109,Polyprenyltransferase (cytochrome oxidase assembly factor)	GO:0007005,biological_process,mitochondrion organization;GO:0045333,biological_process,cellular respiration;GO:0006783,biological_process,heme biosynthetic process;GO:0008535,biological_process,respiratory chain complex IV assembly;GO:0009060,biological_process,aerobic respiration;GO:0005739,cellular_component,mitochondrion;GO:0006784,biological_process,heme a biosynthetic process;GO:0008495,mole…	-
LRRC28	0.767734	0.105937	2.8147	2.28316	0.000165623	0.000478009	ENSG00000168904	H2QA53,Leucine rich repeat containing 28	XP_009428194.1,-;XP_009428193.1,-;XP_001141916.2,leucine-rich repeat-containing protein 28 isoform X1	PF13855,Leucine rich repeat	IPR001611,Leucine-rich repeat;IPR003591,Leucine-rich repeat, typical subtype;IPR032675,Leucine-rich repeat domain superfamily	KOG0619,FOG: Leucine rich repeat;COG4886,Leucine-rich repeat (LRR) protein	GO:0005886,cellular_component,plasma membrane;GO:0007165,biological_process,signal transduction	-
RP11-417N10.4	7.14524	0.985948	2.8147	2.28316	0.000165623	0.000478009	ENSG00000279592	A0A096NSG8,Zinc finger protein 821	XP_017809010.1,-;XP_017809005.1,-;XP_017809006.1,-;XP_017809009.1,-;XP_017809008.1,-;XP_017809003.1,-;XP_017809007.1,-;XP_017809004.1,-;XP_003917185.1,zinc finger protein 821 isoform X1;XP_009195064.1,-	-	IPR013087,Zinc finger C2H2-type;IPR036236,Zinc finger C2H2 superfamily	-	GO:0003676,molecular_function,nucleic acid binding	-
SYDE1	1.79667	0.247917	2.8147	2.28316	0.000165623	0.000478009	ENSG00000105137	H2QFL6,Synapse defective 1, Rho GTPase, homolog 1	XP_003316210.1,rho GTPase-activating protein SYDE1	PF00620,RhoGAP domain	IPR008936,Rho GTPase activation protein;IPR000198,Rho GTPase-activating protein domain	KOG1452,Predicted Rho GTPase-activating protein;ENOG410XYAD,-	GO:0005737,cellular_component,cytoplasm;GO:1901165,biological_process,positive regulation of trophoblast cell migration;GO:0051493,biological_process,regulation of cytoskeleton organization;GO:0007165,biological_process,signal transduction;GO:0043087,biological_process,regulation of GTPase activity	-
ADM2	3.27646	0.459771	2.81165	3.15571	3.13e-07	1.64e-06	ENSG00000128165	G1QIU5,Uncharacterized protein	-	-	-	-	-	-
NHS	1.37787	0.19335	2.81165	3.15571	3.13e-07	1.64e-06	ENSG00000188158	F7CLI9,NHS actin remodeling regulator	XP_001104388.1,Nance-Horan syndrome protein isoform X2	PF15273,NHS-like	IPR024845,Nance-Horan syndrome protein family	ENOG4111BJV,-;ENOG410IJ2I,-	GO:0030154,biological_process,cell differentiation;GO:0030054,cellular_component,cell junction;GO:0005794,cellular_component,Golgi apparatus;GO:0016604,cellular_component,nuclear body;GO:0002088,biological_process,lens development in camera-type eye	-
HCG11	8.87631	1.25622	2.81008	4.07771	2.05e-11	2.76e-10	ENSG00000228223	G2HGJ2,Retinal rod rhodopsin-sensitive cGMP 3',5'-cyclic phosphodiesterase subunit delta	-	-	-	-	-	-
CASD1	2.20746	0.310817	2.80252	2.9126	2.72e-06	1.17e-05	ENSG00000127995	H2QUY3,CAS1 domain containing 1	XP_519208.3,CAS1 domain-containing protein 1 isoform X1	PF07779,10 TM Acyl Transferase domain found in Cas1p	IPR012419,Cas1p 10 TM acyl transferase domain;IPR036915,Cyclin-like superfamily	ENOG410XPE6,-;KOG1699,O-acetyltransferase	GO:0047186,molecular_function,N-acetylneuraminate 7-O(or 9-O)-acetyltransferase activity;GO:0005975,biological_process,carbohydrate metabolic process;GO:0030173,cellular_component,integral component of Golgi membrane	-
MAML2	17.002	2.44284	2.79663	6.13509	2.23e-23	3.05e-21	ENSG00000184384	B7ZL21,MAML2 protein	-	PF09596,MamL-1 domain	IPR019082,Neurogenic mastermind-like, N-terminal	ENOG4111GMG,-;ENOG410ISMW,-	GO:0003713,molecular_function,transcription coactivator activity;GO:0007219,biological_process,Notch signaling pathway;GO:0045944,biological_process,positive regulation of transcription by RNA polymerase II;GO:0016607,cellular_component,nuclear speck	-
MEF2D	16.7335	2.40628	2.79511	5.96361	2.45e-22	2.99e-20	ENSG00000116604	G3SH47,Myocyte enhancer factor 2D	XP_004027021.1,-;XP_018880146.1,-;XP_018880139.1,-	PF12347,Holliday junction regulator protein family C-terminal repeat;PF00319,SRF-type transcription factor (DNA-binding and dimerisation domain)	IPR002100,Transcription factor, MADS-box;IPR036879,Transcription factor, MADS-box superfamily;IPR033896,MADS MEF2-like;IPR022102,Holliday junction regulator protein family C-terminal	-	GO:0046983,molecular_function,protein dimerization activity;GO:0007512,biological_process,adult heart development;GO:0006355,biological_process,regulation of transcription, DNA-templated;GO:0006351,biological_process,transcription, DNA-templated;GO:0046982,molecular_function,protein heterodimerization activity;GO:0005634,cellular_component,nucleus;GO:0042826,molecular_function,histone deacetylase…	K09262,ko04022,cGMP-PKG signaling pathway
PANX2	6.65991	0.950668	2.79415	3.67671	1.94e-09	1.67e-08	ENSG00000073150	B3KTT7,Pannexin	NP_443071.2,pannexin-2 isoform 1	PF00876,Innexin	IPR000990,Innexin	ENOG410IGKS,-;ENOG4110P9D,-	GO:0030054,cellular_component,cell junction;GO:0005921,cellular_component,gap junction;GO:0006811,biological_process,ion transport;GO:0005886,cellular_component,plasma membrane;GO:0016020,cellular_component,membrane;GO:0016021,cellular_component,integral component of membrane	-
PPIP5K1	0.588137	0.081155	2.79396	1.78899	0.0024261	0.00536972	ENSG00000168781	G3QPQ2,Diphosphoinositol pentakisphosphate kinase 1	-	PF00328,Histidine phosphatase superfamily (branch 2)	IPR037446,Histidine acid phosphatase, VIP1 family;IPR029033,Histidine phosphatase superfamily;IPR000560,Histidine phosphatase superfamily, clade-2;IPR033379,Histidine acid phosphatase active site	-	GO:0000829,molecular_function,inositol heptakisphosphate kinase activity;GO:0016310,biological_process,phosphorylation	-
NR1D1	1.71328	0.236409	2.79396	1.78899	0.0024261	0.00536972	ENSG00000126368	H2QCV8,Nuclear receptor subfamily 1, group D, member 1	XP_511468.2,-	PF00105,Zinc finger, C4 type (two domains);PF00104,Ligand-binding domain of nuclear hormone receptor	IPR001628,Zinc finger, nuclear hormone receptor-type;IPR000536,Nuclear hormone receptor, ligand-binding domain;IPR035500,Nuclear hormone receptor-like domain superfamily;IPR001723,Nuclear hormone receptor;IPR013088,Zinc finger, NHR/GATA-type	ENOG410IMDK,-;ENOG410ZPPI,-	GO:0045598,biological_process,regulation of fat cell differentiation;GO:0061469,biological_process,regulation of type B pancreatic cell proliferation;GO:0005978,biological_process,glycogen biosynthetic process;GO:0010498,biological_process,proteasomal protein catabolic process;GO:0060086,biological_process,circadian temperature homeostasis;GO:0000122,biological_process,negative regulation of tran…	K03728,ko04710,Circadian rhythm
ZNF555	0.555008	0.0765837	2.79396	1.78899	0.0024261	0.00536972	ENSG00000186300	H2RGS4,Uncharacterized protein	XP_009432605.1,zinc finger protein 555 isoform X3	PF00096,Zinc finger, C2H2 type;PF13894,C2H2-type zinc finger;PF01352,KRAB box	IPR013087,Zinc finger C2H2-type;IPR001909,Krueppel-associated box;IPR036051,KRAB domain superfamily;IPR036236,Zinc finger C2H2 superfamily	KOG1721,FOG: Zn-finger;COG5048,FOG: Zn-finger	GO:0006355,biological_process,regulation of transcription, DNA-templated;GO:0003676,molecular_function,nucleic acid binding;GO:0046872,molecular_function,metal ion binding;GO:0005622,cellular_component,intracellular	-
SLC3A1	0.726067	0.100188	2.79396	1.78899	0.0024261	0.00536972	ENSG00000138079	A0A0S2Z4E1,Solute carrier family 3	NP_000332.2,neutral and basic amino acid transport protein rBAT	PF00128,Alpha amylase, catalytic domain	IPR017853,Glycoside hydrolase superfamily;IPR006047,Glycosyl hydrolase, family 13, catalytic domain	-	GO:0005975,biological_process,carbohydrate metabolic process;GO:0005774,cellular_component,vacuolar membrane;GO:0031526,cellular_component,brush border membrane;GO:0003824,molecular_function,catalytic activity;GO:0006865,biological_process,amino acid transport;GO:0005886,cellular_component,plasma membrane;GO:0046982,molecular_function,protein heterodimerization activity;GO:0016020,cellular_compon…	K14210,ko04974,Protein digestion and absorption
HECW2	0.374189	0.0516331	2.79396	1.78899	0.0024261	0.00536972	ENSG00000138411	G1R542,HECT, C2 and WW domain containing E3 ubiquitin protein ligase 2	XP_003253925.1,E3 ubiquitin-protein ligase HECW2 isoform X1	PF16562,N-terminal domain of E3 ubiquitin-protein ligase HECW1 and 2;PF00632,HECT-domain (ubiquitin-transferase);PF00168,C2 domain;PF00397,WW domain	IPR001202,WW domain;IPR037795,E3 ubiquitin-protein ligase HECW, C2 domain;IPR000569,HECT domain;IPR032348,E3 ubiquitin-protein ligase HECW1/2, N-terminal;IPR035892,C2 domain superfamily;IPR036020,WW domain superfamily;IPR035983,HECT, E3 ligase catalytic domain;IPR000008,C2 domain	KOG0940,Ubiquitin protein ligase RSP5/NEDD4;COG5021,Ubiquitin-protein ligase	GO:0072686,cellular_component,mitotic spindle;GO:0030071,biological_process,regulation of mitotic metaphase/anaphase transition;GO:0004842,molecular_function,ubiquitin-protein transferase activity;GO:0016740,molecular_function,transferase activity;GO:0016567,biological_process,protein ubiquitination	-
AC096574.4	1.22087	0.168464	2.79396	1.78899	0.0024261	0.00536972	ENSG00000225057	H2P931,Uncharacterized protein	-	PF00076,RNA recognition motif. (a.k.a. RRM, RBD, or RNP domain)	IPR000504,RNA recognition motif domain;IPR035979,RNA-binding domain superfamily;IPR012677,Nucleotide-binding alpha-beta plait domain superfamily	-	GO:0003723,molecular_function,RNA binding;GO:0003676,molecular_function,nucleic acid binding	-
RP11-517I3.1	2.81184	0.387997	2.79396	1.78899	0.0024261	0.00536972	-	-	-	-	-	-	-	-
KDELC2	1.85479	0.262498	2.78883	2.61838	4.17e-05	0.000137892	ENSG00000178202	A0A024R3C4,KDEL	NP_714916.3,KDEL motif-containing protein 2 precursor	PF00630,ilamin/ABP280 repeat;PF05686,lycosyl transferase family 90	IPR017868,Filamin/ABP280 repeat-like;IPR013783,Immunoglobulin-like fold;IPR001298,Filamin/ABP280 repeat;IPR006598,Lipopolysaccharide-modifying protein;IPR014756,Immunoglobulin E-set	KOG2458,Endoplasmic reticulum protein EP58, contains filamin rod domain and KDEL motif;ENOG410XT5U,-	-	-
SP6	2.27262	0.321633	2.78883	2.61838	4.17e-05	0.000137892	ENSG00000189120	G3QPF7,Sp6 transcription factor	-	PF00096,Zinc finger, C2H2 type	-	-	-	-
HRK	2.00973	0.286879	2.78705	3.13567	3.13e-07	1.64e-06	ENSG00000135116	U3E722,Activator of apoptosis harakiri	-	PF15196,Activator of apoptosis harakiri	IPR020728,Apoptosis regulator, Bcl-2, BH3 motif, conserved site;IPR017249,Activator of apoptosis harakiri	-	GO:0042981,biological_process,regulation of apoptotic process;GO:0016021,cellular_component,integral component of membrane;GO:0016020,cellular_component,membrane	-
MEMO1	3.50276	0.502166	2.78615	3.51317	1.71e-08	1.2e-07	ENSG00000162959	F6Y3G0,Mediator of cell motility 1	-	PF01875,Memo-like protein	IPR002737,MEMO1 family	KOG3086,Predicted dioxygenase;COG1355,Predicted dioxygenase	-	-
C11orf24	13.9436	2.02024	2.78086	4.82156	1.93e-15	6.5e-14	ENSG00000171067	A0A024R5K9,Chromosome 11 open reading frame 24, isoform CRA_a	XP_005274110.1,-;NP_071733.1,uncharacterized protein C11orf24 isoform 1 precursor	-	-	ENOG410YWNI,-;ENOG410J32Q,-	GO:0016021,cellular_component,integral component of membrane;GO:0016020,cellular_component,membrane	-
FOXJ3	62.0435	9.03178	2.77952	7.94349	1.82e-31	5.22e-29	ENSG00000198815	H2R952,Forkhead box J3	XP_009453673.1,forkhead box protein J3 isoform X3	PF00250,orkhead domain	IPR018122,Fork head domain conserved site1;IPR001766,Fork head domain;IPR036390,Winged helix DNA-binding domain superfamily;IPR030456,Fork head domain conserved site 2;IPR036388,Winged helix-like DNA-binding domain superfamily	KOG2294,Transcription factor of the Forkhead/HNF3 family;COG5025,Transcription factor of the Forkhead/HNF3 family	GO:0030154,biological_process,cell differentiation;GO:0003677,molecular_function,DNA binding;GO:0000981,molecular_function,RNA polymerase II transcription factor activity, sequence-specific DNA binding;GO:0043565,molecular_function,sequence-specific DNA binding;GO:0006357,biological_process,regulation of transcription by RNA polymerase II;GO:0003700,molecular_function,DNA binding transcription fa…	-
RP1-68D18.4	50.1619	7.2566	2.7793	4.16073	8.56e-12	1.25e-10	ENSG00000255443	A0A146USV1,Uncharacterized protein	-	PF14529,ndonuclease-reverse transcriptase	IPR036691,Endonuclease/exonuclease/phosphatase superfamily;IPR005135,Endonuclease/exonuclease/phosphatase;IPR000477,Reverse transcriptase domain	-	-	-
B3GAT2	3.11067	0.449196	2.7775	3.66291	2.76e-09	2.29e-08	ENSG00000112309	Q599K0,Galactosylgalactosylxylosylprotein 3-beta-glucuronosyltransferase	NP_001032391.1,-	PF03360,lycosyltransferase family 43	IPR005027,Glycosyl transferase, family 43;IPR029044,Nucleotide-diphospho-sugar transferases	ENOG410XP79,-;KOG1476,Beta-1,3-glucuronyltransferase B3GAT1/SQV-8	GO:0005975,biological_process,carbohydrate metabolic process;GO:0015018,molecular_function,galactosylgalactosylxylosylprotein 3-beta-glucuronosyltransferase activity;GO:0016757,molecular_function,transferase activity, transferring glycosyl groups;GO:0006486,biological_process,protein glycosylation;GO:0016740,molecular_function,transferase activity;GO:0046872,molecular_function,metal ion binding;G…	K10157,ko00514,Other types of O-glycan biosynthesis
WAC	43.6422	6.39842	2.76939	8.25812	2.94e-32	9.27e-30	ENSG00000095787	H9FVF8,WW domain containing adaptor with coiled-coil	XP_015002173.1,-	PF00397,WW domain	IPR001202,WW domain;IPR036020,WW domain superfamily	ENOG410ISFU,-;ENOG4111EBW,-	GO:0044783,biological_process,G1 DNA damage checkpoint;GO:0071894,biological_process,histone H2B conserved C-terminal lysine ubiquitination;GO:0006974,biological_process,cellular response to DNA damage stimulus;GO:0000993,molecular_function,RNA polymerase II core binding;GO:0032435,biological_process,negative regulation of proteasomal ubiquitin-dependent protein catabolic process;GO:0045893,biolo…	-
RP11-658F2.8	2.94414	0.420261	2.76603	2.24537	0.000264517	0.000729292	ENSG00000258297	G7P5T5,Uncharacterized protein	-	-	-	-	-	-
NRSN2	2.34788	0.335148	2.76603	2.24537	0.000264517	0.000729292	ENSG00000125841	G3QTK7,Neurensin 2	XP_004061677.1,neurensin-2;XP_018872700.1,-	PF14927,Neurensin	IPR024883,Neurensin;IPR029701,Neurensin-2	-	GO:0031410,cellular_component,cytoplasmic vesicle;GO:0043025,cellular_component,neuronal cell body;GO:0030133,cellular_component,transport vesicle;GO:0005886,cellular_component,plasma membrane;GO:0016020,cellular_component,membrane;GO:0016021,cellular_component,integral component of membrane	-
ADNP-AS1	7.42863	1.0604	2.76603	2.24537	0.000264517	0.000729292	-	-	-	-	-	-	-	-
ZFHX4	0.438984	0.0626627	2.76603	2.24537	0.000264517	0.000729292	ENSG00000091656	G3SI49,Zinc finger homeobox 4	-	PF00096,Zinc finger, C2H2 type;PF12874,Zinc-finger of C2H2 type;PF00046,Homeobox domain	-	-	-	-
BCL9	8.35919	1.22491	2.76531	4.99396	3.34e-16	1.33e-14	ENSG00000116128	A0A024QYY4,B-cell CLL/lymphoma 9, isoform CRA_a	NP_004317.2,B-cell CLL/lymphoma 9 protein;XP_005273028.1,-	PF11502,B-cell lymphoma 9 protein	IPR015668,B Cell Lymphoma 9;IPR024670,B-cell lymphoma 9, beta-catenin binding domain	ENOG410XRMX,-;ENOG410IICK,-	GO:0005794,cellular_component,Golgi apparatus;GO:0005737,cellular_component,cytoplasm;GO:0060070,biological_process,canonical Wnt signaling pathway;GO:0003713,molecular_function,transcription coactivator activity;GO:0035019,biological_process,somatic stem cell population maintenance;GO:0045944,biological_process,positive regulation of transcription by RNA polymerase II;GO:0008013,molecular_functi…	-
ARHGAP17	13.9895	2.0564	2.76407	6.3296	4.72e-24	7.37e-22	ENSG00000140750	G3QM70,Rho GTPase activating protein 17	XP_004057420.1,rho GTPase-activating protein 17 isoform X1	PF03114,BAR domain;PF00620,RhoGAP domain	IPR008936,Rho GTPase activation protein;IPR000198,Rho GTPase-activating protein domain;IPR027267,AH/BAR domain superfamily;IPR004148,BAR domain	-	GO:0005737,cellular_component,cytoplasm;GO:0043547,biological_process,positive regulation of GTPase activity;GO:0005886,cellular_component,plasma membrane;GO:0005096,molecular_function,GTPase activator activity;GO:0005829,cellular_component,cytosol;GO:0005634,cellular_component,nucleus;GO:0007165,biological_process,signal transduction	-
DENND4C	4.589	0.674436	2.75927	4.59002	5.06e-14	1.22e-12	ENSG00000137145	A0A0D9RAJ9,DENN domain containing 4C	XP_007967326.1,-;XP_007967324.1,DENN domain-containing protein 4C isoform X1;XP_007967325.1,-	PF02141,NN (AEX-3) domain;PF03455,dDENN domain;PF03456,uDENN domain	IPR023341,MABP domain;IPR005112,dDENN domain;IPR001194,cDENN domain;IPR037516,Tripartite DENN domain;IPR011990,Tetratricopeptide-like helical domain superfamily;IPR005113,uDENN domain	-	GO:0030904,cellular_component,retromer complex;GO:0072659,biological_process,protein localization to plasma membrane;GO:0065009,biological_process,regulation of molecular function;GO:0005886,cellular_component,plasma membrane;GO:0005829,cellular_component,cytosol;GO:0017112,molecular_function,Rab guanyl-nucleotide exchange factor activity;GO:0032593,cellular_component,insulin-responsive compartme…	-
OSR2	15.9658	2.34844	2.75907	4.80307	3.96e-15	1.24e-13	ENSG00000164920	G3QV09,Odd-skipped related transciption factor 2	XP_004047410.1,protein odd-skipped-related 2 isoform X1	PF00096,Zinc finger, C2H2 type;PF13912,C2H2-type zinc finger	IPR013087,Zinc finger C2H2-type;IPR036236,Zinc finger C2H2 superfamily	-	GO:0003676,molecular_function,nucleic acid binding	-
TAB2	86.7658	12.8667	2.75294	8.2317	7.4e-32	2.25e-29	ENSG00000055208	A0A0D9RXB3,TGF-beta activated kinase 1/MAP3K7 binding protein 2	XP_008004888.1,-;XP_008004889.1,-	PF02845,CUE domain	IPR003892,Ubiquitin system component Cue;IPR001876,Zinc finger, RanBP2-type;IPR036443,Zinc finger, RanBP2-type superfamily	-	GO:0007507,biological_process,heart development;GO:0070530,molecular_function,K63-linked polyubiquitin modification-dependent protein binding;GO:0045860,biological_process,positive regulation of protein kinase activity;GO:0046872,molecular_function,metal ion binding;GO:0005829,cellular_component,cytosol;GO:0043123,biological_process,positive regulation of I-kappaB kinase/NF-kappaB signaling	K04404,ko04620,Toll-like receptor signaling pathway;K04404,ko05140,Leishmaniasis;K04404,ko04668,TNF signaling pathway;K04404,ko05168,Herpes simplex infection;K04404,ko05169,Epstein-Barr virus infection;K04404,ko04621,NOD-like receptor signaling pathway;K04404,ko05145,Toxoplasmosis;K04404,ko04010,MAPK signaling pathway;K04404,ko04380,Osteoclast differentiation;K04404,ko04064,NF-kappa B signaling p…
BMP2K	3.13013	0.461591	2.75235	4.2392	3.7e-12	5.87e-11	ENSG00000138756	H2RA65,Uncharacterized protein	XP_526576.3,BMP-2-inducible protein kinase isoform X1	PF15282,BMP-2-inducible protein kinase C-terminus;PF00069,Protein kinase domain	IPR011009,Protein kinase-like domain superfamily;IPR000719,Protein kinase domain;IPR028182,BMP-2-inducible protein kinase, C-terminal;IPR008271,Serine/threonine-protein kinase, active site;IPR026105,BMP-2-inducible protein kinase	KOG1989,ARK protein kinase family;ENOG410Y515,-	GO:0045747,biological_process,positive regulation of Notch signaling pathway;GO:0005737,cellular_component,cytoplasm;GO:0030500,biological_process,regulation of bone mineralization;GO:0035612,molecular_function,AP-2 adaptor complex binding;GO:2000369,biological_process,regulation of clathrin-dependent endocytosis;GO:0005634,cellular_component,nucleus;GO:0050790,biological_process,regulation of ca…	-
DAGLA	1.56739	0.227663	2.75149	2.58879	6.4e-05	0.000202688	ENSG00000134780	K6ZXB4,Diacylglycerol lipase, alpha	XP_016776509.1,-	PF01764,Lipase (class 3)	IPR002921,Fungal lipase-like domain;IPR029058,Alpha/Beta hydrolase fold	ENOG410XRFI,-;KOG2088,Predicted lipase/calmodulin-binding heat-shock protein	GO:0006629,biological_process,lipid metabolic process;GO:0016787,molecular_function,hydrolase activity;GO:0098921,biological_process,retrograde trans-synaptic signaling by endocannabinoid;GO:0042136,biological_process,neurotransmitter biosynthetic process;GO:0007216,biological_process,G-protein coupled glutamate receptor signaling pathway;GO:0019369,biological_process,arachidonic acid metabolic p…	-
RP4-568C11.4	7.88766	1.14568	2.75149	2.58879	6.4e-05	0.000202688	ENSG00000274173	Q7ZGS2,Env protein	-	-	IPR018154,TLV/ENV coat polyprotein	-	GO:0016021,cellular_component,integral component of membrane;GO:0016020,cellular_component,membrane	-
MEX3C	7.39583	1.09499	2.75065	5.03837	1.99e-16	8.15e-15	ENSG00000176624	A0A096N6D3,Mex-3 RNA binding family member C	XP_003914436.1,RNA-binding E3 ubiquitin-protein ligase MEX3C	PF13920,Zinc finger, C3HC4 type (RING finger);PF00013,KH domain	IPR004087,K Homology domain;IPR001841,Zinc finger, RING-type;IPR004088,K Homology domain, type 1;IPR036612,K Homology domain, type 1 superfamily;IPR013083,Zinc finger, RING/FYVE/PHD-type	-	GO:0003415,biological_process,chondrocyte hypertrophy;GO:0003676,molecular_function,nucleic acid binding;GO:0045598,biological_process,regulation of fat cell differentiation;GO:0097009,biological_process,energy homeostasis;GO:0003723,molecular_function,RNA binding	-
GPR87	93.1381	13.8939	2.74313	6.52422	5.51e-25	1.01e-22	ENSG00000138271	H2QNL3,Uncharacterized protein	XP_001144931.1,G-protein coupled receptor 87;XP_016797655.1,-	PF00001,7 transmembrane receptor (rhodopsin family)	IPR017452,GPCR, rhodopsin-like, 7TM;IPR008109,P2Y13 purinoceptor;IPR000276,G protein-coupled receptor, rhodopsin-like	ENOG410IE7G,-;ENOG410YEMD,-	GO:0035589,biological_process,G-protein coupled purinergic nucleotide receptor signaling pathway;GO:0016021,cellular_component,integral component of membrane;GO:0045028,molecular_function,G-protein coupled purinergic nucleotide receptor activity;GO:0016020,cellular_component,membrane;GO:0007194,biological_process,negative regulation of adenylate cyclase activity;GO:0004871,molecular_function,sign…	-
PBX3	10.6959	1.59165	2.74262	4.85369	2.2e-15	7.29e-14	ENSG00000167081	Q5JS98,Pre-B-cell leukemia transcription factor 3	XP_006717193.1,pre-B-cell leukemia transcription factor 3 isoform X1	PF03792,PBC domain;PF05920,Homeobox KN domain	IPR008422,Homeobox KN domain;IPR001356,Homeobox domain;IPR009057,Homeobox-like domain superfamily;IPR005542,PBX	ENOG410XRVF,-;KOG0774,Transcription factor PBX and related HOX domain proteins	GO:0006355,biological_process,regulation of transcription, DNA-templated;GO:0005515,molecular_function,protein binding;GO:0003700,molecular_function,DNA binding transcription factor activity;GO:0003677,molecular_function,DNA binding;GO:0005634,cellular_component,nucleus	-
S100A12	21.5456	3.16277	2.74258	2.86438	6.24e-06	2.48e-05	ENSG00000163221	G3QV32,S100 calcium binding protein A12	XP_004026774.1,protein S100-A12	PF01023,S-100/ICaBP type calcium binding domain	IPR002048,EF-hand domain;IPR011992,EF-hand domain pair;IPR013787,S100/CaBP-9k-type, calcium binding, subdomain;IPR001751,S100/Calbindin-D9k, conserved site	-	GO:0031640,biological_process,killing of cells of other organism;GO:0005737,cellular_component,cytoplasm;GO:0050832,biological_process,defense response to fungus;GO:0046872,molecular_function,metal ion binding;GO:0050786,molecular_function,RAGE receptor binding;GO:0061844,biological_process,antimicrobial humoral immune response mediated by antimicrobial peptide;GO:0006805,biological_process,xenob…	-
HMCN1	0.600712	0.0881811	2.74258	2.86438	6.24e-06	2.48e-05	ENSG00000143341	K7CJZ0,Hemicentin 1	-	PF12662,Complement Clr-like EGF-like;PF07679,Immunoglobulin I-set domain;PF13927,Immunoglobulin domain;PF00090,Thrombospondin type 1 domain;PF07645,Calcium-binding EGF domain;PF07474,2F domain	IPR003599,Immunoglobulin subtype;IPR013106,Immunoglobulin V-set domain;IPR018097,EGF-like calcium-binding, conserved site;IPR036465,von Willebrand factor A-like domain superfamily;IPR006605,G2 nidogen/fibulin G2F;IPR009017,Green fluorescent protein;IPR007110,Immunoglobulin-like domain;IPR009030,Growth factor receptor cysteine-rich domain superfamily;IPR000884,Thrombospondin type-1 (TSP1) repeat;I…	ENOG410XQFD,-;ENOG410IUGC,-	GO:0005509,molecular_function,calcium ion binding	-
BCL2	0.94863	0.139253	2.74258	2.86438	6.24e-06	2.48e-05	ENSG00000171791	H2QEM8,B-cell CLL/lymphoma 2	XP_001145537.1,-	PF00452,Apoptosis regulator proteins, Bcl-2 family;PF02180,Bcl-2 homology region 4	IPR020717,Apoptosis regulator, Bcl-2, BH1 motif, conserved site;IPR020731,Apoptosis regulator, Bcl-2, BH4 motif, conserved site;IPR026298,Blc2 family;IPR003093,Apoptosis regulator, Bcl-2 protein, BH4;IPR020728,Apoptosis regulator, Bcl-2, BH3 motif, conserved site;IPR020726,Apoptosis regulator, Bcl-2, BH2 motif, conserved site;IPR002475,Bcl2-like;IPR013278,Apoptosis regulator, Bcl-2;IPR036834,Blc2…	ENOG41123S0,-;KOG4728,Anti-apoptotic Bcl-2 family proteins, prevent opening of mitochondrial porin channel	GO:0031103,biological_process,axon regeneration;GO:0051607,biological_process,defense response to virus;GO:0014031,biological_process,mesenchymal cell development;GO:0033138,biological_process,positive regulation of peptidyl-serine phosphorylation;GO:2000134,biological_process,negative regulation of G1/S transition of mitotic cell cycle;GO:0050790,biological_process,regulation of catalytic activi…	K02161,ko05222,Small cell lung cancer;K02161,ko05210,Colorectal cancer;K02161,ko04141,Protein processing in endoplasmic reticulum;K02161,ko01524,Platinum drug resistance;K02161,ko04725,Cholinergic synapse;K02161,ko05169,Epstein-Barr virus infection;K02161,ko01521,EGFR tyrosine kinase inhibitor resistance;K02161,ko04210,Apoptosis;K02161,ko04933,AGE-RAGE signaling pathway in diabetic complications;…
PRDM4	15.6086	2.33212	2.73884	5.45873	7.42e-19	4.83e-17	ENSG00000110851	K7CXK8,PR domain zinc finger protein 4	XP_001162965.1,PR domain zinc finger protein 4 isoform X2	PF00096,Zinc finger, C2H2 type	IPR013087,Zinc finger C2H2-type;IPR001214,SET domain;IPR036236,Zinc finger C2H2 superfamily;IPR017124,PR-domain zinc finger protein PRDM4	KOG1721,FOG: Zn-finger;KOG2461,Transcription factor BLIMP-1/PRDI-BF1, contains C2H2-type Zn-finger and SET domains;COG5048,FOG: Zn-finger	GO:0006366,biological_process,transcription by RNA polymerase II;GO:0003677,molecular_function,DNA binding;GO:0005737,cellular_component,cytoplasm;GO:0003676,molecular_function,nucleic acid binding;GO:0045944,biological_process,positive regulation of transcription by RNA polymerase II;GO:0035097,cellular_component,histone methyltransferase complex;GO:0006355,biological_process,regulation of trans…	K12463,ko04722,Neurotrophin signaling pathway
HIVEP3	7.54902	1.12924	2.73831	5.97374	7.24e-22	8.15e-20	ENSG00000127124	H2R953,Human immunodeficiency virus type I enhancer binding protein 3	XP_001172796.1,transcription factor HIVEP3 isoform X2;XP_016815789.1,-	PF00096,Zinc finger, C2H2 type	IPR013087,Zinc finger C2H2-type;IPR036236,Zinc finger C2H2 superfamily;IPR034729,Zinc finger CCHC HIVEP-type	KOG1721,FOG: Zn-finger;COG5048,FOG: Zn-finger	GO:0006355,biological_process,regulation of transcription, DNA-templated;GO:0043565,molecular_function,sequence-specific DNA binding;GO:0003676,molecular_function,nucleic acid binding;GO:0003700,molecular_function,DNA binding transcription factor activity;GO:0045893,biological_process,positive regulation of transcription, DNA-templated;GO:0005634,cellular_component,nucleus;GO:0006366,biological_p…	-
FOXD2-AS1	0.946433	0.130595	2.73405	1.0159	0.0246349	0.0421007	-	-	-	-	-	-	-	-
NBPF19	0.126409	0.0174428	2.73405	1.0159	0.0246349	0.0421007	ENSG00000271383	H7BY70,Neuroblastoma breakpoint family member 20	-	PF06758,Repeat of unknown function (DUF1220)	IPR010630,Neuroblastoma breakpoint family (NBPF) domain	ENOG410KG3F,-;ENOG4110SQ7,-	-	-
ALG1L9P	0.577903	0.0797429	2.73405	1.0159	0.0246349	0.0421007	ENSG00000254978	B4DGH2,cDNA FLJ56781	-	-	-	-	-	-
PIWIL4	0.520974	0.0718875	2.73405	1.0159	0.0246349	0.0421007	ENSG00000134627	A0A140VKG8,Piwi-like 4	NP_689644.2,piwi-like protein 4	PF02170,PAZ domain;PF02171,Piwi domain	IPR036397,Ribonuclease H superfamily;IPR036085,PAZ domain superfamily;IPR003100,PAZ domain;IPR003165,Piwi domain;IPR012337,Ribonuclease H-like superfamily	-	GO:0003676,molecular_function,nucleic acid binding;GO:0031047,biological_process,gene silencing by RNA	K02156,ko04320,Dorso-ventral axis formation
NDUFA4L2	0.846259	0.116772	2.73405	1.0159	0.0246349	0.0421007	ENSG00000185633	G3V560,NADH dehydrogenase [ubiquinone] 1 alpha subcomplex subunit 4-like 2	-	PF06522,NADH-ubiquinone reductase complex 1 MLRQ subunit	IPR010530,NADH-ubiquinone reductase complex 1 MLRQ subunit	ENOG410J463,-;ENOG410XWHY,-	GO:0016021,cellular_component,integral component of membrane;GO:0016020,cellular_component,membrane	-
EFS	0.733581	0.101224	2.73405	1.0159	0.0246349	0.0421007	ENSG00000100842	H2Q807,Embryonal Fyn-associated substrate	XP_509854.2,embryonal Fyn-associated substrate isoform X1	PF14604,Variant SH3 domain;PF12026,omain of unknown function (DUF3513)	IPR035747,Embryonal Fyn-associated substrate, SH3 domain;IPR021901,CAS family, C-terminal;IPR036028,SH3-like domain superfamily;IPR037362,CAS family;IPR001452,SH3 domain	ENOG410IEDN,-;ENOG410YE49,-	GO:0019904,molecular_function,protein domain specific binding;GO:0017124,molecular_function,SH3 domain binding	-
PGBD4	0.359135	0.0495559	2.73405	1.0159	0.0246349	0.0421007	ENSG00000182405	K7DKZ9,PiggyBac transposable element derived 4	XP_016783387.1,piggyBac transposable element-derived protein 4	PF13842,_Tnp_1-like zinc-ribbon;PF13843,Transposase IS4	IPR032718,PiggyBac transposable element-derived protein 4, C-terminal zinc-ribbon;IPR029526,PiggyBac transposable element-derived protein	-	-	-
C15orf65	2.81685	0.388687	2.73405	1.0159	0.0246349	0.0421007	ENSG00000261652	K7BYQ4,Putative LOC145788	XP_003314728.1,uncharacterized protein C15orf65 homolog isoform X2	PF14892,omain of unknown function (DUF4490)	IPR026507,Uncharacterised protein family UPF0691	-	-	-
SCIMP	0.564306	0.0778668	2.73405	1.0159	0.0246349	0.0421007	ENSG00000161929	H2QC00,SLP adaptor and CSK interacting membrane protein	-	PF15050,SCIMP protein	IPR028181,SLP adapter and CSK-interacting membrane protein	ENOG41114KD,-;ENOG410J1IN,-	GO:0097197,cellular_component,tetraspanin-enriched microdomain;GO:0007127,biological_process,meiosis I;GO:0070374,biological_process,positive regulation of ERK1 and ERK2 cascade;GO:0001772,cellular_component,immunological synapse;GO:0031256,cellular_component,leading edge membrane;GO:0031259,cellular_component,uropod membrane;GO:0016020,cellular_component,membrane;GO:0016021,cellular_component,in…	-
RP11-609D21.3	0.722642	0.099715	2.73405	1.0159	0.0246349	0.0421007	ENSG00000279296	A0A0V0V388,LINE-1 reverse transcriptase-like protein	-	PF03372,ndonuclease/Exonuclease/phosphatase family;PF08333,Protein of unknown function (DUF1725);PF00078,Reverse transcriptase (RNA-dependent DNA polymerase)	IPR013544,Domain of unknown function DUF1725;IPR005135,Endonuclease/exonuclease/phosphatase;IPR000477,Reverse transcriptase domain;IPR036691,Endonuclease/exonuclease/phosphatase superfamily	-	GO:0003964,molecular_function,RNA-directed DNA polymerase activity;GO:0006278,biological_process,RNA-dependent DNA biosynthetic process	-
RP11-815I9.4	1.29547	0.178758	2.73405	1.0159	0.0246349	0.0421007	-	-	-	-	-	-	-	-
ASB16	1.06484	0.146934	2.73405	1.0159	0.0246349	0.0421007	ENSG00000161664	H2QD65,Uncharacterized protein	XP_511545.2,ankyrin repeat and SOCS box protein 16 isoform X1	PF12796,Ankyrin repeats (3 copies);PF07525,SOCS box	IPR020683,Ankyrin repeat-containing domain;IPR036036,SOCS box-like domain superfamily;IPR002110,Ankyrin repeat;IPR001496,SOCS box domain;IPR036770,Ankyrin repeat-containing domain superfamily	KOG0504,FOG: Ankyrin repeat;COG0666,FOG: Ankyrin repeat	GO:0016567,biological_process,protein ubiquitination;GO:0005737,cellular_component,cytoplasm;GO:0035556,biological_process,intracellular signal transduction;GO:0000151,cellular_component,ubiquitin ligase complex;GO:0031625,molecular_function,ubiquitin protein ligase binding;GO:0004842,molecular_function,ubiquitin-protein transferase activity;GO:0005634,cellular_component,nucleus	-
RP11-839G9.1	4.18801	0.57789	2.73405	1.0159	0.0246349	0.0421007	-	-	-	-	-	-	-	-
KLHL26	0.495018	0.0683059	2.73405	1.0159	0.0246349	0.0421007	ENSG00000167487	G3RUT6,Kelch like family member 26	XP_004060394.1,-	PF01344,Kelch motif;PF00651,BTB/POZ domain;PF07707,BTB And C-terminal Kelch	IPR011705,BTB/Kelch-associated;IPR011333,SKP1/BTB/POZ domain superfamily;IPR030588,Kelch-like protein 26;IPR015915,Kelch-type beta propeller;IPR017096,BTB-kelch protein;IPR006652,Kelch repeat type 1;IPR000210,BTB/POZ domain	-	-	-
ZNF613	0.61598	0.084997	2.73405	1.0159	0.0246349	0.0421007	ENSG00000176024	H2NZX5,Zinc finger protein 613	XP_009231277.1,-;XP_009231276.1,zinc finger protein 613 isoform X1	PF00096,Zinc finger, C2H2 type;PF01352,KRAB box	IPR013087,Zinc finger C2H2-type;IPR001909,Krueppel-associated box;IPR036051,KRAB domain superfamily;IPR036236,Zinc finger C2H2 superfamily	KOG1721,FOG: Zn-finger;COG5048,FOG: Zn-finger	GO:0006355,biological_process,regulation of transcription, DNA-templated;GO:0003676,molecular_function,nucleic acid binding;GO:0046872,molecular_function,metal ion binding;GO:0005622,cellular_component,intracellular	-
ZNF784	1.15384	0.159215	2.73405	1.0159	0.0246349	0.0421007	ENSG00000179922	H2R3A0,Zinc finger protein 784	XP_009434734.1,-	PF00096,Zinc finger, C2H2 type	IPR013087,Zinc finger C2H2-type;IPR036236,Zinc finger C2H2 superfamily	KOG1721,FOG: Zn-finger;COG5048,FOG: Zn-finger	GO:0002244,biological_process,hematopoietic progenitor cell differentiation;GO:0003676,molecular_function,nucleic acid binding	-
AC125232.1	1.68651	0.232716	2.73405	1.0159	0.0246349	0.0421007	ENSG00000231259	G1QLA6,Anaphase promoting complex subunit 1	-	-	IPR024990,Anaphase-promoting complex subunit 1	KOG1858,Anaphase-promoting complex (APC), subunit 1 (meiotic check point regulator/Tsg24);ENOG410XQ83,-	GO:0070979,biological_process,protein K11-linked ubiquitination;GO:0005680,cellular_component,anaphase-promoting complex	K03348,ko04111,Cell cycle - yeast;K03348,ko04120,Ubiquitin mediated proteolysis;K03348,ko04914,Progesterone-mediated oocyte maturation;K03348,ko04114,Oocyte meiosis;K03348,ko05166,HTLV-I infection;K03348,ko04110,Cell cycle;K03348,ko04113,Meiosis - yeast
CCDC74A	0.771726	0.106488	2.73405	1.0159	0.0246349	0.0421007	ENSG00000163040	K7BLB7,Coiled-coil domain containing 74B	XP_009441602.2,coiled-coil domain-containing protein 74B isoform X2	PF14917,Coiled coil protein 74, C terminal;PF14916,Coiled-coil domain of unknown function	IPR033226,Coiled-coil domain-containing protein 74;IPR029422,Coiled coil protein 74, C-terminal	ENOG4112DFU,-;ENOG410J255,-	-	-
DHRS9	0.633227	0.0873769	2.73405	1.0159	0.0246349	0.0421007	ENSG00000073737	H2QIX9,Uncharacterized protein	XP_003309347.2,dehydrogenase/reductase SDR family member 9 isoform X2	PF13561,noyl-(Acyl carrier protein) reductase;PF00106,short chain dehydrogenase	IPR036291,NAD(P)-binding domain superfamily;IPR002347,Short-chain dehydrogenase/reductase SDR	ENOG410Y7FK,-;KOG1610,Corticosteroid 11-beta-dehydrogenase and related short chain-type dehydrogenases	GO:0004745,molecular_function,retinol dehydrogenase activity;GO:0004022,molecular_function,alcohol dehydrogenase (NAD) activity;GO:0008209,biological_process,androgen metabolic process;GO:0030176,cellular_component,integral component of endoplasmic reticulum membrane;GO:0016021,cellular_component,integral component of membrane;GO:0016020,cellular_component,membrane;GO:0055114,biological_process,o…	-
BHLHE40-AS1	0.873979	0.120598	2.73405	1.0159	0.0246349	0.0421007	ENSG00000235831	H2PFT0,Uncharacterized protein	-	-	-	ENOG410IUV6,-;ENOG4110PU0,-	-	-
KIF9-AS1	0.48481	0.0668974	2.73405	1.0159	0.0246349	0.0421007	ENSG00000227398	H2PAW8,Kinesin-like protein	-	PF00225,Kinesin motor domain	IPR027640,Kinesin-like protein;IPR019821,Kinesin motor domain, conserved site;IPR001752,Kinesin motor domain;IPR036961,Kinesin motor domain superfamily;IPR027417,P-loop containing nucleoside triphosphate hydrolase	COG5059,Kinesin-like protein;KOG4280,Kinesin-like protein	GO:0002102,cellular_component,podosome;GO:1903008,biological_process,organelle disassembly;GO:0022617,biological_process,extracellular matrix disassembly;GO:0031982,cellular_component,vesicle;GO:0003777,molecular_function,microtubule motor activity;GO:0046983,molecular_function,protein dimerization activity;GO:0003774,molecular_function,motor activity;GO:0005874,cellular_component,microtubule;GO:…	-
ERICH6-AS1	2.87134	0.396207	2.73405	1.0159	0.0246349	0.0421007	ENSG00000240137	D3DNJ2,HCG1811296, isoform CRA_a	-	-	-	-	-	-
BCHE	0.770474	0.106315	2.73405	1.0159	0.0246349	0.0421007	ENSG00000114200	D3DNN4,Carboxylic ester hydrolase	XP_016862456.1,cholinesterase isoform X1	PF08674,Acetylcholinesterase tetramerisation domain;PF07859,alpha/beta hydrolase fold;PF00135,Carboxylesterase family	IPR014788,Acetylcholinesterase, tetramerisation domain;IPR019819,Carboxylesterase type B, conserved site;IPR019826,Carboxylesterase type B, active site;IPR002018,Carboxylesterase, type B;IPR000997,Cholinesterase;IPR029058,Alpha/Beta hydrolase fold	COG2272,Carboxylesterase type B;KOG4389,Acetylcholinesterase/Butyrylcholinesterase	GO:0016787,molecular_function,hydrolase activity;GO:0004104,molecular_function,cholinesterase activity;GO:0016021,cellular_component,integral component of membrane;GO:0016020,cellular_component,membrane	-
NUDT6	0.360279	0.0497138	2.73405	1.0159	0.0246349	0.0421007	ENSG00000170917	H2QQ48,Uncharacterized protein	XP_517426.2,nucleoside diphosphate-linked moiety X motif 6 isoform X1	PF00293,NUDIX domain	IPR015797,NUDIX hydrolase-like domain superfamily;IPR003293,Nudix hydrolase 6-like;IPR000086,NUDIX hydrolase domain;IPR020084,NUDIX hydrolase, conserved site	KOG0648,Predicted NUDIX hydrolase FGF-2 and related proteins;ENOG410Z4GH,-	GO:0016787,molecular_function,hydrolase activity	-
RP1-313I6.12	3.46152	0.477644	2.73405	1.0159	0.0246349	0.0421007	-	-	-	-	-	-	-	-
AL354822.1	0.784474	0.108247	2.73405	1.0159	0.0246349	0.0421007	ENSG00000278384	Q6ZW97,Hypothetical LOC389834	-	-	-	-	-	-
AC007325.2	0.98736	0.136243	2.73405	1.0159	0.0246349	0.0421007	ENSG00000277196	A0A087WWM6,Proline dehydrogenase	-	PF01619,Proline dehydrogenase	IPR002872,Proline dehydrogenase domain;IPR029041,FAD-linked oxidoreductase-like;IPR015659,Proline oxidase family	COG0506,Proline dehydrogenase;KOG0186,Proline oxidase	GO:0006560,biological_process,proline metabolic process;GO:0055114,biological_process,oxidation-reduction process;GO:0016491,molecular_function,oxidoreductase activity;GO:0006562,biological_process,proline catabolic process;GO:0004657,molecular_function,proline dehydrogenase activity	-
ZXDA	0.57734	0.0796653	2.73405	1.0159	0.0246349	0.0421007	ENSG00000198205	A8K9H1,cDNA FLJ76957, highly similar to Homo sapiens zinc finger, X-linked, duplicated A	-	PF00096,Zinc finger, C2H2 type;PF13912,C2H2-type zinc finger	IPR013087,Zinc finger C2H2-type;IPR036236,Zinc finger C2H2 superfamily	KOG1721,FOG: Zn-finger;COG5048,FOG: Zn-finger	GO:0003676,molecular_function,nucleic acid binding	-
SLAIN2	11.7201	1.75785	2.73343	5.49485	4.3e-19	2.94e-17	ENSG00000109171	A0A024R9T6,HCG17415, isoform CRA_a	NP_065897.1,SLAIN motif-containing protein 2	PF15301,SLAIN motif-containing family	IPR026179,SLAIN motif-containing protein	ENOG410IF0R,-;ENOG410XPVV,-	GO:0031122,biological_process,cytoplasmic microtubule organization;GO:0005813,cellular_component,centrosome;GO:0005829,cellular_component,cytosol;GO:0031113,biological_process,regulation of microtubule polymerization	-
KCTD1	5.89645	0.884382	2.73068	4.71147	2.49e-14	6.44e-13	ENSG00000134504	A0A250XXD6,BTB/POZ domain-containing protein KCTD1	XP_020033852.1,-	-	IPR000210,BTB/POZ domain;IPR011333,SKP1/BTB/POZ domain superfamily;IPR003131,Potassium channel tetramerisation-type BTB domain	-	GO:0051260,biological_process,protein homooligomerization	-
TFAP2A	16.9059	2.54342	2.73068	6.34597	8.57e-24	1.28e-21	ENSG00000137203	A0A1D5QZG4,Transcription factor AP-2 alpha	XP_001089006.3,-	-	IPR004979,Transcription factor AP-2;IPR008121,Transcription factor AP-2 alpha, N-terminal;IPR013854,Transcription factor AP-2, C-terminal	-	GO:0006355,biological_process,regulation of transcription, DNA-templated;GO:0003700,molecular_function,DNA binding transcription factor activity;GO:0005634,cellular_component,nucleus	-
MTF1	8.64137	1.30673	2.72128	5.35865	5.88e-18	3.27e-16	ENSG00000188786	H2R0J1,Metal-regulatory transcription factor 1	XP_016806861.1,-;XP_016806813.1,-;XP_009451322.1,-	PF00096,Zinc finger, C2H2 type	IPR013087,Zinc finger C2H2-type;IPR036236,Zinc finger C2H2 superfamily;IPR029796,Metal regulatory transcription factor 1	KOG1721,FOG: Zn-finger;COG5048,FOG: Zn-finger	GO:0000978,molecular_function,RNA polymerase II proximal promoter sequence-specific DNA binding;GO:0003677,molecular_function,DNA binding;GO:0003676,molecular_function,nucleic acid binding;GO:0035035,molecular_function,histone acetyltransferase binding;GO:0003700,molecular_function,DNA binding transcription factor activity;GO:0045944,biological_process,positive regulation of transcription by RNA …	-
UBAP2L	156.693	23.757	2.72128	9.40549	1.27e-33	4.17e-31	ENSG00000143569	H2R3M4,Ubiquitin associated protein 2-like	XP_016783373.1,-	PF12478,Ubiquitin-associated protein 2	IPR015940,Ubiquitin-associated domain;IPR009060,UBA-like superfamily;IPR022166,Protein of unknown function DUF3697, ubiquitin-associated protein 2	ENOG410IGWX,-;ENOG4110RI8,-	GO:0005737,cellular_component,cytoplasm;GO:0061484,biological_process,hematopoietic stem cell homeostasis;GO:0010628,biological_process,positive regulation of gene expression;GO:0005634,cellular_component,nucleus	-
NKRF	6.52363	0.982008	2.72119	4.00346	1.34e-10	1.48e-09	ENSG00000186416	H2QZ19,Uncharacterized protein	XP_009437843.1,-	PF01424,R3H domain;PF01585,-patch domain	IPR000467,G-patch domain;IPR001374,R3H domain;IPR034071,NF-kappaB-repression factor, R3H domain;IPR014720,Double-stranded RNA-binding domain;IPR036867,R3H domain superfamily	KOG1721,FOG: Zn-finger;COG5048,FOG: Zn-finger	GO:0003676,molecular_function,nucleic acid binding	-
RP11-574K11.5	10.1387	1.47264	2.72051	1.73464	0.00394482	0.0083203	-	-	-	-	-	-	-	-
RP11-96C23.13	0.989417	0.143712	2.72051	1.73464	0.00394482	0.0083203	ENSG00000151303	G3S3H7,Uncharacterized protein	-	PF12796,Ankyrin repeats (3 copies);PF01412,Putative GTPase activating protein for Arf	-	-	-	-
LMF1	0.548007	0.0795976	2.72051	1.73464	0.00394482	0.0083203	ENSG00000103227	K6Z8U7,Lipase maturation factor	-	PF06762,Lipase maturation factor	IPR009613,Lipase maturation factor	ENOG410XPYW,-;ENOG410IHGU,-	GO:0005789,cellular_component,endoplasmic reticulum membrane;GO:0016021,cellular_component,integral component of membrane;GO:0005783,cellular_component,endoplasmic reticulum;GO:0016020,cellular_component,membrane	-
CTD-3203P2.3	6.31013	0.916541	2.72051	1.73464	0.00394482	0.0083203	-	-	-	-	-	-	-	-
TUG1_2	51.8591	7.53249	2.72051	1.73464	0.00394482	0.0083203	-	-	-	-	-	-	-	-
PHTF1	0.92732	0.137098	2.71566	2.20651	0.000421961	0.00110867	ENSG00000116793	H2PZP5,Putative homeodomain transcription factor 1	XP_001154352.1,putative homeodomain transcription factor 1 isoform X1;XP_009427177.1,-;XP_009427168.1,-;XP_016780845.1,-	PF12129,Male germ-cell putative homeodomain transcription factor	IPR021980,Transcription factor homeodomain, male germ-cell	ENOG410ZM0V,-;ENOG410IF1F,-	GO:0003677,molecular_function,DNA binding;GO:0016021,cellular_component,integral component of membrane;GO:0016020,cellular_component,membrane	-
RBM20	0.814615	0.120435	2.71566	2.20651	0.000421961	0.00110867	ENSG00000203867	H2R7D9,Uncharacterized protein	XP_508032.3,RNA-binding protein 20	-	IPR000690,Matrin/U1-C, C2H2-type zinc finger;IPR003604,Matrin/U1-C-like, C2H2-type zinc finger;IPR034791,RNA-binding protein 20;IPR012677,Nucleotide-binding alpha-beta plait domain superfamily;IPR034790,RBM20, RNA recognition motif;IPR000504,RNA recognition motif domain;IPR035979,RNA-binding domain superfamily	ENOG410ZE4G,-;ENOG410IGBX,-	GO:0003723,molecular_function,RNA binding;GO:0003676,molecular_function,nucleic acid binding;GO:0043484,biological_process,regulation of RNA splicing;GO:0008270,molecular_function,zinc ion binding;GO:0005634,cellular_component,nucleus	-
C11orf71	2.9656	0.438444	2.71566	2.20651	0.000421961	0.00110867	ENSG00000282682	H2Q4T4,Chromosome 11 open reading frame 71	-	PF15747,omain of unknown function (DUF4687)	IPR031487,Protein of unknown function DUF4687	ENOG4111CNR,-;ENOG410J0JN,-	-	-
LINC01296	1.02844	0.152048	2.71566	2.20651	0.000421961	0.00110867	ENSG00000244306	G7PZ30,Uncharacterized protein	-	PF00046,Homeobox domain	IPR001356,Homeobox domain;IPR009057,Homeobox-like domain superfamily;IPR000047,Helix-turn-helix motif	-	GO:0003677,molecular_function,DNA binding;GO:0005634,cellular_component,nucleus	-
AC093838.4	1.69874	0.251147	2.71566	2.20651	0.000421961	0.00110867	ENSG00000152117	H7BXF4,Sphingomyelin phosphodiesterase 4	NP_060221.2,sphingomyelin phosphodiesterase 4 isoform 1	PF14724,Mitochondrial-associated sphingomyelin phosphodiesterase	IPR024129,Sphingomyelin phosphodiesterase 4	KOG4396,Predicted membrane-anchored protein;ENOG410YYEJ,-	GO:0050290,molecular_function,sphingomyelin phosphodiesterase D activity;GO:0016021,cellular_component,integral component of membrane;GO:0016020,cellular_component,membrane	K12353,ko00600,Sphingolipid metabolism
DOCK10	0.600893	0.0888378	2.71566	2.20651	0.000421961	0.00110867	ENSG00000135905	H2QJJ2,Dedicator of cytokinesis 10	XP_003309526.1,dedicator of cytokinesis protein 10 isoform X9	PF06920,ock homology region 2;PF14429,C2 domain in Dock180 and Zizimin proteins;PF11878,omain of unknown function (DUF3398);PF00169,PH domain	IPR037809,Dedicator of cytokinesis D, C2 domain;IPR001849,Pleckstrin homology domain;IPR011993,PH-like domain superfamily;IPR010703,Dedicator of cytokinesis, C-terminal;IPR035892,C2 domain superfamily;IPR021816,Dedicator of cytokinesis C/D, N-terminal;IPR027007,DHR-1 domain;IPR027357,DHR-2 domain;IPR026791,Dedicator of cytokinesis	ENOG410XNVY,-;KOG1997,PH domain-containing protein	GO:0005085,molecular_function,guanyl-nucleotide exchange factor activity;GO:0065009,biological_process,regulation of molecular function;GO:0007264,biological_process,small GTPase mediated signal transduction;GO:0005622,cellular_component,intracellular	-
SHQ1	1.13831	0.168291	2.71566	2.20651	0.000421961	0.00110867	ENSG00000144736	H2QMX7,SHQ1 homolog	XP_001141951.1,protein SHQ1 homolog isoform X1	PF04925,SHQ1 protein	IPR007052,CS domain;IPR008978,HSP20-like chaperone;IPR007009,SHQ1 protein	ENOG410ZIEU,-;KOG3247,Uncharacterized conserved protein	GO:2000233,biological_process,negative regulation of rRNA processing;GO:0000493,biological_process,box H/ACA snoRNP assembly;GO:0005737,cellular_component,cytoplasm;GO:0022618,biological_process,ribonucleoprotein complex assembly;GO:1904874,biological_process,positive regulation of telomerase RNA localization to Cajal body;GO:0051082,molecular_function,unfolded protein binding;GO:0005829,cellular…	-
SH3TC2	0.441874	0.065328	2.71566	2.20651	0.000421961	0.00110867	ENSG00000169247	H2QRR4,Uncharacterized protein	XP_527069.3,SH3 domain and tetratricopeptide repeat-containing protein 2 isoform X1	PF00018,SH3 domain	IPR001452,SH3 domain;IPR036028,SH3-like domain superfamily;IPR011990,Tetratricopeptide-like helical domain superfamily;IPR019734,Tetratricopeptide repeat	ENOG410IFSQ,-;ENOG410Y8HX,-	GO:1901184,biological_process,regulation of ERBB signaling pathway;GO:0033157,biological_process,regulation of intracellular protein transport;GO:0022011,biological_process,myelination in peripheral nervous system;GO:0005886,cellular_component,plasma membrane;GO:0031410,cellular_component,cytoplasmic vesicle;GO:0055037,cellular_component,recycling endosome;GO:0032287,biological_process,peripheral…	-
TBX18	0.785085	0.116069	2.71566	2.20651	0.000421961	0.00110867	ENSG00000112837	H2QTC7,Uncharacterized protein	XP_530953.2,T-box transcription factor TBX18 isoform X1	PF00907,T-box	IPR001699,Transcription factor, T-box;IPR036960,T-box superfamily;IPR008967,p53-like transcription factor, DNA-binding;IPR018186,Transcription factor, T-box, conserved site	KOG3586,TBX1 and related T-box transcription factors;ENOG410Y98J,-	GO:0072001,biological_process,renal system development;GO:0003677,molecular_function,DNA binding;GO:0003700,molecular_function,DNA binding transcription factor activity;GO:0006355,biological_process,regulation of transcription, DNA-templated;GO:0006351,biological_process,transcription, DNA-templated;GO:0005634,cellular_component,nucleus	-
ZNF783	0.988535	0.146148	2.71566	2.20651	0.000421961	0.00110867	ENSG00000204946	G3QUC3,Zinc finger family member 783	-	PF12417,Zinc finger protein;PF00096,Zinc finger, C2H2 type;PF01352,KRAB box	IPR013087,Zinc finger C2H2-type;IPR022137,Protein of unknown function DUF3669, zinc finger protein;IPR036051,KRAB domain superfamily;IPR036236,Zinc finger C2H2 superfamily;IPR001909,Krueppel-associated box	-	GO:0006355,biological_process,regulation of transcription, DNA-templated;GO:0003676,molecular_function,nucleic acid binding;GO:0046872,molecular_function,metal ion binding;GO:0005622,cellular_component,intracellular	-
SKIDA1	1.31135	0.19562	2.71317	2.55855	3.36e-05	0.000113158	ENSG00000180592	E9PAX1,SKI/DACH domain-containing protein 1	-	PF02437,SKI/SNO/DAC family;PF15223,omain of unknown function (DUF4584)	IPR003380,SKI/SNO/DAC domain;IPR027971,Polycomb repressive complex 2-associated factor EPOP;IPR037000,Ski-like, DNA-binding domain superfamily;IPR009061,Putative DNA-binding domain superfamily	-	-	-
MUC2	0.693615	0.10347	2.71317	2.55855	3.36e-05	0.000113158	ENSG00000198788	A0A0G2JR65,Mucin-2	-	PF13330,Mucin-2 protein WxxW repeating region;PF00094,von Willebrand factor type D domain;PF08742,C8 domain;PF01826,Trypsin Inhibitor like cysteine rich domain	IPR025155,WxxW domain;IPR002919,Trypsin Inhibitor-like, cysteine rich domain;IPR036084,Serine protease inhibitor-like superfamily;IPR001846,von Willebrand factor, type D domain;IPR006207,Cystine knot, C-terminal;IPR014853,Uncharacterised domain, cysteine-rich;IPR028580,Mucin-2;IPR001007,VWFC domain	-	GO:0070701,cellular_component,mucus layer;GO:0005576,cellular_component,extracellular region	-
GNAZ	2.28803	0.341316	2.71317	2.55855	3.36e-05	0.000113158	ENSG00000128266	F7I574,G protein subunit alpha z	XP_002743656.1,-	PF00503,-protein alpha subunit	IPR011025,G protein alpha subunit, helical insertion;IPR001408,G-protein alpha subunit, group I;IPR001019,Guanine nucleotide binding protein (G-protein), alpha subunit;IPR027417,P-loop containing nucleoside triphosphate hydrolase	ENOG410XNVQ,-;KOG0082,G-protein alpha subunit (small G protein superfamily)	GO:0005525,molecular_function,GTP binding;GO:0000166,molecular_function,nucleotide binding;GO:0004871,molecular_function,signal transducer activity;GO:0019001,molecular_function,guanyl nucleotide binding;GO:0003924,molecular_function,GTPase activity;GO:0007186,biological_process,G-protein coupled receptor signaling pathway;GO:0031683,molecular_function,G-protein beta/gamma-subunit complex binding…	K04535,ko04730,Long-term depression
AC055764.1	18.5751	2.77094	2.71317	2.55855	3.36e-05	0.000113158	ENSG00000234136	F7H456,Leucine rich repeats and calponin homology domain containing 3	-	PF13855,Leucine rich repeat;PF00307,Calponin homology (CH) domain	IPR001611,Leucine-rich repeat;IPR001715,Calponin homology domain;IPR003591,Leucine-rich repeat, typical subtype;IPR032675,Leucine-rich repeat domain superfamily;IPR036872,CH domain superfamily	-	-	-
BEND6	1.5723	0.234548	2.71317	2.55855	3.36e-05	0.000113158	ENSG00000151917	G1QRH8,BEN domain containing 6	XP_003254165.1,BEN domain-containing protein 6	PF10523,BEN domain	IPR037496,BEN domain-containing protein 6;IPR018379,BEN domain	ENOG4111841,-;ENOG410IEM7,-	GO:0000122,biological_process,negative regulation of transcription by RNA polymerase II;GO:0045746,biological_process,negative regulation of Notch signaling pathway;GO:0045666,biological_process,positive regulation of neuron differentiation;GO:1903507,biological_process,negative regulation of nucleic acid-templated transcription;GO:0001106,molecular_function,RNA polymerase II transcription corepr…	-
ZNF496	5.72736	0.871197	2.71222	5.16395	9.75e-17	4.28e-15	ENSG00000162714	A0A024R5Q5,Zinc finger protein 496, isoform CRA_b	NP_116141.1,zinc finger protein 496 isoform 1	PF00096,Zinc finger, C2H2 type;PF01352,KRAB box;PF02023,SCAN domain	IPR013087,Zinc finger C2H2-type;IPR036236,Zinc finger C2H2 superfamily;IPR003309,SCAN domain;IPR001909,Krueppel-associated box;IPR027767,Zinc finger protein 496;IPR038269,SCAN domain superfamily;IPR036051,KRAB domain superfamily	KOG1721,FOG: Zn-finger;COG5048,FOG: Zn-finger	GO:0003677,molecular_function,DNA binding;GO:0043621,molecular_function,protein self-association;GO:0003676,molecular_function,nucleic acid binding;GO:0003700,molecular_function,DNA binding transcription factor activity;GO:0045893,biological_process,positive regulation of transcription, DNA-templated;GO:0000122,biological_process,negative regulation of transcription by RNA polymerase II;GO:000635…	-
ZNF319	2.55572	0.383322	2.71165	2.83963	9.45e-06	3.61e-05	ENSG00000166188	K7CWY1,Zinc finger protein 319	XP_016785425.1,-;XP_016785424.1,-;XP_016785422.1,-	PF00096,Zinc finger, C2H2 type;PF13465,Zinc-finger double domain	IPR013087,Zinc finger C2H2-type;IPR036236,Zinc finger C2H2 superfamily	KOG1721,FOG: Zn-finger;COG5048,FOG: Zn-finger	GO:0003676,molecular_function,nucleic acid binding;GO:0005634,cellular_component,nucleus	-
IFT43	3.13047	0.471232	2.71062	3.07373	1.04e-06	4.89e-06	ENSG00000119650	A0A024R6A9,HCG2028821, isoform CRA_h	NP_443105.2,intraflagellar transport protein 43 homolog isoform 1	PF15305,Intraflagellar transport protein 43	IPR029302,Intraflagellar transport protein 43	ENOG4111KGC,-;ENOG410IG89,-	GO:0015630,cellular_component,microtubule cytoskeleton;GO:0005815,cellular_component,microtubule organizing center;GO:0030991,cellular_component,intraciliary transport particle A;GO:0005929,cellular_component,cilium	-
ZNF204P	5.44861	0.820184	2.71062	3.07373	1.04e-06	4.89e-06	-	-	-	-	-	-	-	-
ZNF680	2.72063	0.410606	2.70989	3.27441	1.3e-07	7.4e-07	ENSG00000173041	G1R806,Zinc finger protein 680	-	PF00096,Zinc finger, C2H2 type;PF01352,KRAB box;PF13912,C2H2-type zinc finger	-	-	-	-
OSBPL5	2.60805	0.394987	2.7089	3.60632	1.13e-08	8.22e-08	ENSG00000021762	K7CL39,Oxysterol-binding protein	-	PF01237,Oxysterol-binding protein;PF00169,PH domain	IPR000648,Oxysterol-binding protein;IPR037239,Oxysterol-binding protein superfamily;IPR001849,Pleckstrin homology domain;IPR018494,Oxysterol-binding protein, conserved site;IPR011993,PH-like domain superfamily	-	GO:0006869,biological_process,lipid transport	-
LINC00470	4.79245	0.725811	2.7089	3.60632	1.13e-08	8.22e-08	ENSG00000132204	H2RH36,Uncharacterized protein	-	-	-	-	-	-
KLF12	2.56526	0.389968	2.70783	4.10102	5.33e-11	6.47e-10	ENSG00000118922	G3QNE9,Kruppel like factor 12	-	PF00096,Zinc finger, C2H2 type	IPR013087,Zinc finger C2H2-type;IPR036236,Zinc finger C2H2 superfamily	-	GO:0003677,molecular_function,DNA binding;GO:0003676,molecular_function,nucleic acid binding;GO:0003700,molecular_function,DNA binding transcription factor activity;GO:0000122,biological_process,negative regulation of transcription by RNA polymerase II;GO:0005829,cellular_component,cytosol;GO:0005654,cellular_component,nucleoplasm	-
TSHZ1	4.416	0.672658	2.70726	4.46752	6.64e-13	1.26e-11	ENSG00000179981	H2NWL5,Teashirt zinc finger homeobox 1	XP_009250755.1,teashirt homolog 1 isoform X1	-	IPR013087,Zinc finger C2H2-type;IPR027008,Teashirt family;IPR001356,Homeobox domain;IPR026808,Teashirt homologue 1	ENOG410XQQR,-;ENOG410IJEQ,-	GO:0042474,biological_process,middle ear morphogenesis;GO:0003677,molecular_function,DNA binding;GO:0003676,molecular_function,nucleic acid binding;GO:0060023,biological_process,soft palate development;GO:0010468,biological_process,regulation of gene expression;GO:0009952,biological_process,anterior/posterior pattern specification	-
GORASP2	29.6158	4.54065	2.70366	6.52927	2.37e-24	3.89e-22	ENSG00000115806	G3S170,Golgi reassembly stacking protein 2	-	PF04495,RASP55/65 PDZ-like domain	-	-	-	-
EML1	4.56295	0.699585	2.69866	4.61359	1.7e-13	3.69e-12	ENSG00000066629	H2R968,Uncharacterized protein	XP_001157076.2,echinoderm microtubule-associated protein-like 1 isoform X3	PF03451,HELP motif;PF00400,WD domain, G-beta repeat	IPR005108,HELP;IPR011047,Quinoprotein alcohol dehydrogenase-like superfamily;IPR015943,WD40/YVTN repeat-like-containing domain superfamily;IPR001680,WD40 repeat;IPR017986,WD40-repeat-containing domain	ENOG410XNTQ,-;KOG2106,Uncharacterized conserved protein, contains HELP and WD40 domains	GO:1990023,cellular_component,mitotic spindle midzone;GO:0000226,biological_process,microtubule cytoskeleton organization;GO:0007405,biological_process,neuroblast proliferation;GO:0097431,cellular_component,mitotic spindle pole;GO:0007420,biological_process,brain development;GO:0007052,biological_process,mitotic spindle organization;GO:0002244,biological_process,hematopoietic progenitor cell diff…	-
KCNH7	14.5608	2.23976	2.69691	5.423	3.16e-18	1.89e-16	ENSG00000184611	H2QIW5,Uncharacterized protein	XP_525954.2,potassium voltage-gated channel subfamily H member 7 isoform X3	PF13426,PAS domain;PF00027,Cyclic nucleotide-binding domain;PF00520,Ion transport protein	IPR000014,PAS domain;IPR014710,RmlC-like jelly roll fold;IPR003967,Potassium channel, voltage-dependent, ERG;IPR000595,Cyclic nucleotide-binding domain;IPR035965,PAS domain superfamily;IPR018490,Cyclic nucleotide-binding-like;IPR027359,Voltage-dependent channel domain superfamily;IPR005821,Ion transport domain;IPR003938,Potassium channel, voltage-dependent, EAG/ELK/ERG	ENOG410XPSE,-;KOG0498,K+-channel ERG and related proteins, contain PAS/PAC sensor domain	GO:0005216,molecular_function,ion channel activity;GO:0005267,molecular_function,potassium channel activity;GO:0005244,molecular_function,voltage-gated ion channel activity;GO:0055085,biological_process,transmembrane transport;GO:0005249,molecular_function,voltage-gated potassium channel activity;GO:0006811,biological_process,ion transport;GO:0071805,biological_process,potassium ion transmembrane…	-
LAMP3	8.40071	1.28799	2.69688	4.2871	9.7e-12	1.4e-10	ENSG00000078081	B2R7Z2,cDNA, FLJ93669, highly similar to Homo sapiens lysosomal-associated membrane protein 3	-	PF01299,Lysosome-associated membrane glycoprotein (Lamp)	IPR002000,Lysosome-associated membrane glycoprotein	KOG4818,Lysosomal-associated membrane protein;ENOG410XQ96,-	GO:0005764,cellular_component,lysosome;GO:0016021,cellular_component,integral component of membrane;GO:0005765,cellular_component,lysosomal membrane;GO:0016020,cellular_component,membrane	-
PPARA	2.26341	0.347022	2.69627	4.19233	1.63e-11	2.25e-10	ENSG00000186951	G3R7V1,Peroxisome proliferator activated receptor alpha	-	PF00105,Zinc finger, C4 type (two domains);PF00104,Ligand-binding domain of nuclear hormone receptor	-	-	-	-
ACADSB	4.10003	0.628611	2.69476	3.9815	2.51e-10	2.63e-09	ENSG00000196177	A0A0S2Z3P9,Acyl-CoA dehydrogenase short/branched chain isoform 1	NP_001600.1,short/branched chain specific acyl-CoA dehydrogenase, mitochondrial isoform 1 precursor	PF00441,Acyl-CoA dehydrogenase, C-terminal domain;PF02771,Acyl-CoA dehydrogenase, N-terminal domain;PF02770,Acyl-CoA dehydrogenase, middle domain	IPR036250,Acyl-CoA dehydrogenase-like, C-terminal;IPR013786,Acyl-CoA dehydrogenase/oxidase, N-terminal;IPR009100,Acyl-CoA dehydrogenase/oxidase, N-terminal and middle domain superfamily;IPR037069,Acyl-CoA dehydrogenase/oxidase, N-terminal domain superfamily;IPR009075,Acyl-CoA dehydrogenase/oxidase C-terminal;IPR006091,Acyl-CoA oxidase/dehydrogenase, central domain;IPR006089,Acyl-CoA dehydrogenase…	-	GO:0016627,molecular_function,oxidoreductase activity, acting on the CH-CH group of donors;GO:0050660,molecular_function,flavin adenine dinucleotide binding;GO:0016491,molecular_function,oxidoreductase activity;GO:0005739,cellular_component,mitochondrion;GO:0008152,biological_process,metabolic process;GO:0055114,biological_process,oxidation-reduction process;GO:0003995,molecular_function,acyl-CoA…	K09478,ko01212,Fatty acid metabolism;K09478,ko00280,Valine, leucine and isoleucine degradation;K09478,ko00071,Fatty acid degradation
PGM3	3.49635	0.536055	2.69476	3.9815	2.51e-10	2.63e-09	ENSG00000013375	G3S9W3,Phosphoacetylglucosamine mutase	-	PF00408,Phosphoglucomutase/phosphomannomutase, C-terminal domain;PF02878,Phosphoglucomutase/phosphomannomutase, alpha/beta/alpha domain I	IPR016657,Phosphoacetylglucosamine mutase;IPR005843,Alpha-D-phosphohexomutase, C-terminal;IPR005844,Alpha-D-phosphohexomutase, alpha/beta/alpha domain I;IPR016066,Alpha-D-phosphohexomutase, conserved site;IPR016055,Alpha-D-phosphohexomutase, alpha/beta/alpha I/II/III;IPR036900,Alpha-D-phosphohexomutase, C-terminal domain superfamily	-	GO:0007283,biological_process,spermatogenesis;GO:0005975,biological_process,carbohydrate metabolic process;GO:0030097,biological_process,hemopoiesis;GO:0004610,molecular_function,phosphoacetylglucosamine mutase activity;GO:0016868,molecular_function,intramolecular transferase activity, phosphotransferases;GO:0006487,biological_process,protein N-linked glycosylation;GO:0046872,molecular_function,m…	-
RPTOR	5.89288	0.907365	2.6943	5.04528	4.36e-16	1.7e-14	ENSG00000141564	K7CSM3,Regulatory associated protein of MTOR, complex 1	XP_016788587.1,-	PF00400,WD domain, G-beta repeat;PF02985,HEAT repeat;PF14538,Raptor N-terminal CASPase like domain	IPR029347,Raptor, N-terminal CASPase-like domain;IPR017986,WD40-repeat-containing domain;IPR036322,WD40-repeat-containing domain superfamily;IPR015943,WD40/YVTN repeat-like-containing domain superfamily;IPR004083,Regulatory associated protein of TOR;IPR011989,Armadillo-like helical;IPR000357,HEAT repeat;IPR016024,Armadillo-type fold;IPR001680,WD40 repeat	ENOG410XQKJ,-;KOG1517,Guanine nucleotide binding protein MIP1	GO:0031931,cellular_component,TORC1 complex;GO:0031929,biological_process,TOR signaling	K07204,ko04150,mTOR signaling pathway;K07204,ko04910,Insulin signaling pathway;K07204,ko04152,AMPK signaling pathway;K07204,ko04151,PI3K-Akt signaling pathway;K07204,ko04211,Longevity regulating pathway;K07204,ko05206,MicroRNAs in cancer;K07204,ko04213,Longevity regulating pathway - multiple species
SMAD1	3.88058	0.594965	2.69379	3.86309	1.27e-09	1.14e-08	ENSG00000170365	A0A1D5Q7V1,Mothers against decapentaplegic homolog	XP_014994751.1,-;XP_014994750.1,-;NP_001248296.1,-;XP_014994753.1,-;XP_014994752.1,-	-	IPR003619,MAD homology 1, Dwarfin-type;IPR001132,SMAD domain, Dwarfin-type;IPR013790,Dwarfin;IPR017855,SMAD-like domain superfamily;IPR008984,SMAD/FHA domain superfamily;IPR036578,SMAD MH1 domain superfamily;IPR013019,MAD homology, MH1	ENOG410XQKU,-;KOG3701,TGFbeta receptor signaling protein SMAD and related proteins	GO:0003677,molecular_function,DNA binding;GO:0005667,cellular_component,transcription factor complex;GO:0005737,cellular_component,cytoplasm;GO:0007179,biological_process,transforming growth factor beta receptor signaling pathway;GO:0003700,molecular_function,DNA binding transcription factor activity;GO:0006355,biological_process,regulation of transcription, DNA-templated;GO:0006351,biological_pr…	K04676,ko04550,Signaling pathways regulating pluripotency of stem cells;K04676,ko04350,TGF-beta signaling pathway;K04676,ko04390,Hippo signaling pathway;K04676,ko04391,Hippo signaling pathway - fly;K04676,ko05202,Transcriptional misregulation in cancer
MUC15	4.45768	0.683446	2.68722	3.25599	1.91e-07	1.05e-06	ENSG00000169550	A0A0A0MT67,Mucin-15	NP_001128563.1,mucin-15 isoform a	PF15672,Cell-membrane associated Mucin15	IPR031371,Cell-membrane associated Mucin-15	ENOG41113G6,-;ENOG410IM00,-	GO:0016021,cellular_component,integral component of membrane;GO:0016020,cellular_component,membrane	-
LRRC37A4P	2.1606	0.33126	2.68722	3.25599	1.91e-07	1.05e-06	ENSG00000214425	A8MUI5,Leucine-rich repeat-containing protein 37A	-	PF14914,LRRC37A/B like protein 1 C-terminal domain;PF13855,Leucine rich repeat;PF15779,Leucine-rich repeat-containing protein 37 family	IPR001611,Leucine-rich repeat;IPR032754,Leucine-rich repeat-containing protein 37, N-terminal;IPR032675,Leucine-rich repeat domain superfamily;IPR029423,LRRC37A/B like protein 1, C-terminal;IPR003591,Leucine-rich repeat, typical subtype;IPR015753,Leucine-rich repeat-containing protein 37	ENOG410YV94,-;ENOG410IJNR,-	GO:0016021,cellular_component,integral component of membrane;GO:0016020,cellular_component,membrane	-
TMEM217	5.46583	0.838014	2.68722	3.25599	1.91e-07	1.05e-06	ENSG00000172738	H2QSX6,Transmembrane protein 217	XP_009449446.1,-	PF15049,Protein of unknown function (DUF4534)	IPR027862,Protein of unknown function DUF4534	ENOG410YZ2V,-;ENOG410IX9G,-	GO:0016020,cellular_component,membrane;GO:0005730,cellular_component,nucleolus;GO:0016021,cellular_component,integral component of membrane;GO:0001650,cellular_component,fibrillar center	-
CTD-2031P19.5	16.0889	2.46673	2.68422	3.05245	1.55e-06	7.07e-06	ENSG00000262211	H2R0A7,Interleukin 6 signal transducer	-	PF00041,ibronectin type III domain;PF09240,Interleukin-6 receptor alpha chain, binding;PF06328,Ig-like C2-type domain	IPR003529,Long hematopoietin receptor, Gp130 family 2, conserved site;IPR010457,Immunoglobulin C2-set-like, ligand-binding;IPR036116,Fibronectin type III superfamily;IPR003961,Fibronectin type III;IPR013783,Immunoglobulin-like fold;IPR015321,Type I cytokine receptor, cytokine-binding domain	ENOG410YNQ4,-;ENOG410IF1N,-	GO:0019221,biological_process,cytokine-mediated signaling pathway;GO:0004896,molecular_function,cytokine receptor activity;GO:0016020,cellular_component,membrane	K05060,ko04630,Jak-STAT signaling pathway;K05060,ko04060,Cytokine-cytokine receptor interaction;K05060,ko04550,Signaling pathways regulating pluripotency of stem cells;K05060,ko05203,Viral carcinogenesis
PLEKHB1	2.16617	0.332114	2.68004	2.81443	1.43e-05	5.26e-05	ENSG00000021300	A0A024R5H9,Pleckstrin homology domain containing, family B	NP_067023.1,pleckstrin homology domain-containing family B member 1 isoform a	PF00169,PH domain	IPR001849,Pleckstrin homology domain;IPR011993,PH-like domain superfamily	ENOG410IXBE,-;ENOG410Y287,-	GO:0045595,biological_process,regulation of cell differentiation	-
CNOT6LP1	7.30896	1.1206	2.68004	2.81443	1.43e-05	5.26e-05	ENSG00000230183	A0A1S3FG18,CCR4-NOT transcription complex subunit 6-like	XP_012875553.1,CCR4-NOT transcription complex subunit 6-like	-	IPR036691,Endonuclease/exonuclease/phosphatase superfamily;IPR005135,Endonuclease/exonuclease/phosphatase;IPR032675,Leucine-rich repeat domain superfamily;IPR034967,CCR4-NOT transcription complex subunit 6-like	-	GO:0004535,molecular_function,poly(A)-specific ribonuclease activity;GO:0090503,biological_process,RNA phosphodiester bond hydrolysis, exonucleolytic	-
ZNF616	4.32099	0.669931	2.67655	3.72067	3.76e-09	3.04e-08	ENSG00000204611	H2QFX3,Uncharacterized protein	XP_512866.2,zinc finger protein 616 isoform X2	PF00096,Zinc finger, C2H2 type;PF01352,KRAB box	IPR013087,Zinc finger C2H2-type;IPR001909,Krueppel-associated box;IPR036051,KRAB domain superfamily;IPR036236,Zinc finger C2H2 superfamily	KOG1721,FOG: Zn-finger;COG5048,FOG: Zn-finger	GO:0006355,biological_process,regulation of transcription, DNA-templated;GO:0003676,molecular_function,nucleic acid binding;GO:0003700,molecular_function,DNA binding transcription factor activity;GO:0046872,molecular_function,metal ion binding;GO:0005622,cellular_component,intracellular	-
LRP12	2.1616	0.335137	2.67655	3.72067	3.76e-09	3.04e-08	ENSG00000147650	K7BJL2,Low density lipoprotein receptor-related protein 12	XP_009454055.1,low-density lipoprotein receptor-related protein 12 isoform X1	PF00431,CUB domain;PF00057,Low-density lipoprotein receptor domain class A	IPR002172,Low-density lipoprotein (LDL) receptor class A repeat;IPR000859,CUB domain;IPR035914,Spermadhesin, CUB domain superfamily;IPR023415,Low-density lipoprotein (LDL) receptor class A, conserved site;IPR036055,LDL receptor-like superfamily	ENOG410YUIT,-;ENOG410IPT2,-	GO:0031175,biological_process,neuron projection development;GO:0005887,cellular_component,integral component of plasma membrane;GO:0001764,biological_process,neuron migration	-
OLMALINC	3.35106	0.51378	2.67379	2.52763	5.25e-05	0.000169653	ENSG00000235823	A0A0A0WBS4,Embryonic stem cell related protein	-	-	-	-	-	-
INPP5E	1.31719	0.20195	2.67379	2.52763	5.25e-05	0.000169653	ENSG00000148384	K7B557,Inositol polyphosphate-5-phosphatase, 72 kDa	NP_001070981.1,72 kDa inositol polyphosphate 5-phosphatase	PF03372,ndonuclease/Exonuclease/phosphatase family	IPR036691,Endonuclease/exonuclease/phosphatase superfamily;IPR000300,Inositol polyphosphate-related phosphatase;IPR005135,Endonuclease/exonuclease/phosphatase	-	GO:0046856,biological_process,phosphatidylinositol dephosphorylation;GO:0016787,molecular_function,hydrolase activity	K20278,ko04070,Phosphatidylinositol signaling system;K20278,ko00562,Inositol phosphate metabolism
TNFSF15	2.40801	0.373808	2.67334	3.57715	1.6e-08	1.13e-07	ENSG00000181634	A0A0U5JA19,Tumor necrosis factor ligand 1B	NP_005109.2,tumor necrosis factor ligand superfamily member 15 isoform VEGI-251 precursor	PF00229,TNF(Tumour Necrosis Factor) family	IPR006053,Tumour necrosis factor;IPR008064,Tumor necrosis factor ligand superfamily member 15;IPR008983,Tumour necrosis factor-like domain superfamily;IPR006052,Tumour necrosis factor domain	-	GO:0006915,biological_process,apoptotic process;GO:0005164,molecular_function,tumor necrosis factor receptor binding;GO:0005125,molecular_function,cytokine activity;GO:0010469,biological_process,regulation of signaling receptor activity;GO:0006955,biological_process,immune response;GO:0016021,cellular_component,integral component of membrane;GO:0007165,biological_process,signal transduction;GO:00…	K05478,ko04060,Cytokine-cytokine receptor interaction
BCL6	10.9172	1.7106	2.66992	5.27053	2.98e-17	1.45e-15	ENSG00000113916	G3SJM6,B-cell CLL/lymphoma 6	XP_004038239.1,B-cell lymphoma 6 protein isoform X2	PF00096,Zinc finger, C2H2 type;PF00651,BTB/POZ domain	IPR013087,Zinc finger C2H2-type;IPR011333,SKP1/BTB/POZ domain superfamily;IPR000210,BTB/POZ domain;IPR036236,Zinc finger C2H2 superfamily	-	GO:0003676,molecular_function,nucleic acid binding	-
ZNF697	3.34451	0.519998	2.66934	3.41742	1.05e-07	6.15e-07	ENSG00000143067	H2PZS9,Uncharacterized protein	-	PF00096,Zinc finger, C2H2 type	IPR013087,Zinc finger C2H2-type;IPR036236,Zinc finger C2H2 superfamily	KOG1721,FOG: Zn-finger;COG5048,FOG: Zn-finger	GO:0003676,molecular_function,nucleic acid binding	-
SEC23IP	6.36889	0.999609	2.6663	4.91016	6.15e-15	1.86e-13	ENSG00000107651	B3KM47,cDNA FLJ10273 fis, clone HEMBB1001137, highly similar to SEC23-interacting protein	-	PF02862,HD domain;PF00536,SAM domain (Sterile alpha motif)	IPR037603,SEC23-interacting protein, SAM domain;IPR004177,DDHD domain;IPR001660,Sterile alpha motif domain;IPR013761,Sterile alpha motif/pointed domain superfamily	KOG2308,Phosphatidic acid-preferring phospholipase A1, contains DDHD domain;ENOG410YDSX,-	GO:0006888,biological_process,ER to Golgi vesicle-mediated transport;GO:0005737,cellular_component,cytoplasm;GO:0046872,molecular_function,metal ion binding	-
SPATA7	0.932978	0.143043	2.66347	2.16651	0.000421961	0.00110867	ENSG00000042317	V9HVY9,Epididymis secretory protein Li 296	NP_060888.2,spermatogenesis-associated protein 7 isoform 1	PF15244,Spermatogenesis-associated protein 7, or HSD3	IPR029357,Spermatogenesis-associated protein 7	ENOG410IKU4,-;ENOG4111WP7,-	GO:1903546,biological_process,protein localization to photoreceptor outer segment;GO:0045494,biological_process,photoreceptor cell maintenance;GO:0032391,cellular_component,photoreceptor connecting cilium;GO:0005739,cellular_component,mitochondrion;GO:0005829,cellular_component,cytosol;GO:1903621,biological_process,protein localization to photoreceptor connecting cilium;GO:0005654,cellular_compon…	-
RP11-72I8.1	2.46783	0.378364	2.66347	2.16651	0.000421961	0.00110867	ENSG00000260735	A0A1A9AQR1,Uncharacterized protein	-	-	-	-	-	-
RNFT1	1.88627	0.2892	2.66347	2.16651	0.000421961	0.00110867	ENSG00000189050	K7CZJ6,Ring finger protein, transmembrane 1	-	PF13920,Zinc finger, C3HC4 type (RING finger)	IPR001841,Zinc finger, RING-type;IPR017907,Zinc finger, RING-type, conserved site;IPR013083,Zinc finger, RING/FYVE/PHD-type	KOG0802,E3 ubiquitin ligase;ENOG410XTGA,-;KOG4638,Uncharacterized conserved protein	GO:0016021,cellular_component,integral component of membrane;GO:0016020,cellular_component,membrane	-
MPV17L2	3.00301	0.460417	2.66347	2.16651	0.000421961	0.00110867	ENSG00000254858	H2QFS8,MPV17 mitochondrial membrane protein-like 2	XP_001173861.1,-	PF04117,Mpv17 / PMP22 family	IPR007248,Mpv17/PMP22	KOG1944,Peroxisomal membrane protein MPV17 and related proteins;ENOG4111SYH,-	GO:0061668,biological_process,mitochondrial ribosome assembly;GO:0005743,cellular_component,mitochondrial inner membrane;GO:0070131,biological_process,positive regulation of mitochondrial translation;GO:0005762,cellular_component,mitochondrial large ribosomal subunit;GO:0016021,cellular_component,integral component of membrane;GO:0005739,cellular_component,mitochondrion	K13348,ko04146,Peroxisome
FOXA2	2.46309	0.377637	2.66347	2.16651	0.000421961	0.00110867	ENSG00000125798	B0ZTD4,Forkhead box A2	NP_068556.2,hepatocyte nuclear factor 3-beta isoform 1	PF00250,orkhead domain;PF08430,orkhead N-terminal region;PF09354,HNF3 C-terminal domain	IPR018533,Forkhead box protein, C-terminal;IPR013638,Fork-head N-terminal;IPR018122,Fork head domain conserved site1;IPR036388,Winged helix-like DNA-binding domain superfamily;IPR001766,Fork head domain;IPR030456,Fork head domain conserved site 2;IPR036390,Winged helix DNA-binding domain superfamily	COG5025,Transcription factor of the Forkhead/HNF3 family;KOG3563,Forkhead/HNF-3-related transcription factor	GO:0019904,molecular_function,protein domain specific binding;GO:0030054,cellular_component,cell junction;GO:0003677,molecular_function,DNA binding;GO:0043565,molecular_function,sequence-specific DNA binding;GO:0003700,molecular_function,DNA binding transcription factor activity;GO:0006355,biological_process,regulation of transcription, DNA-templated;GO:0008134,molecular_function,transcription fa…	-
USP54	7.22531	1.13844	2.66214	5.3516	2.08e-17	1.04e-15	ENSG00000166348	G3R6Y1,Ubiquitin specific peptidase 54	XP_004049637.1,inactive ubiquitin carboxyl-terminal hydrolase 54 isoform X1;XP_018890517.1,-	PF00443,Ubiquitin carboxyl-terminal hydrolase	IPR028889,Ubiquitin specific protease domain;IPR001394,Peptidase C19, ubiquitin carboxyl-terminal hydrolase	-	GO:0036459,molecular_function,thiol-dependent ubiquitinyl hydrolase activity;GO:0016579,biological_process,protein deubiquitination	-
NFE2L2	47.1822	7.45312	2.66139	7.36205	1.82e-27	4.23e-25	ENSG00000116044	E2I973,Nuclear factor erythroid-derived 2-like 2 transcript variant 1	-	PF03131,bZIP Maf transcription factor	IPR004826,Basic leucine zipper domain, Maf-type;IPR008917,Transcription factor, Skn-1-like, DNA-binding domain superfamily;IPR029845,Nuclear factor erythroid 2-related factor 2;IPR004827,Basic-leucine zipper domain	ENOG410ISV3,-;ENOG41100FB,-	GO:0003677,molecular_function,DNA binding;GO:0005737,cellular_component,cytoplasm;GO:0003700,molecular_function,DNA binding transcription factor activity;GO:0006355,biological_process,regulation of transcription, DNA-templated;GO:0006351,biological_process,transcription, DNA-templated;GO:0005634,cellular_component,nucleus;GO:0034599,biological_process,cellular response to oxidative stress	-
FAM86C2P	6.14241	0.963149	2.66027	3.7073	3.76e-09	3.04e-08	ENSG00000160172	K7CAR1,Family with sequence similarity 86, member A	XP_016784858.1,protein-lysine N-methyltransferase EEF2KMT isoform X1	PF10294,Lysine methyltransferase;PF14904,amily of unknown function	IPR029426,FAM86;IPR029063,S-adenosyl-L-methionine-dependent methyltransferase;IPR019410,Lysine methyltransferase	-	GO:0005737,cellular_component,cytoplasm;GO:0016279,molecular_function,protein-lysine N-methyltransferase activity;GO:0018023,biological_process,peptidyl-lysine trimethylation;GO:0032991,cellular_component,protein-containing complex	-
GLTSCR1	2.7836	0.436477	2.66027	3.7073	3.76e-09	3.04e-08	ENSG00000063169	H2QGP8,BRD4 interacting chromatin remodeling complex associated protein	XP_003316527.1,glioma tumor suppressor candidate region gene 1 protein isoform X1;XP_009434213.1,-	PF15249,Conserved region of unknown function on GLTSCR protein	IPR015671,GLTSCR protein, conserved region	ENOG41126SK,-;ENOG410IIYC,-	-	-
RP11-47I22.4	21.3379	3.36496	2.64892	3.4008	1.52e-07	8.55e-07	ENSG00000258989	H0YJX3,Uncharacterized protein	-	PF00069,Protein kinase domain	IPR011009,Protein kinase-like domain superfamily;IPR000961,AGC-kinase, C-terminal;IPR000719,Protein kinase domain	KOG0694,Serine/threonine protein kinase;ENOG410XNPH,-	GO:0016301,molecular_function,kinase activity;GO:0016740,molecular_function,transferase activity;GO:0016310,biological_process,phosphorylation;GO:0004672,molecular_function,protein kinase activity;GO:0006468,biological_process,protein phosphorylation;GO:0000166,molecular_function,nucleotide binding;GO:0005524,molecular_function,ATP binding;GO:0004674,molecular_function,protein serine/threonine ki…	-
CCDC92	16.2581	2.59007	2.64814	6.2973	1.62e-22	2.03e-20	ENSG00000119242	K7CM86,Coiled-coil domain containing 92	XP_016778152.1,-;XP_016778153.1,-;XP_016778149.1,-;XP_016778151.1,-;XP_016778150.1,-	PF14916,Coiled-coil domain of unknown function	IPR033224,Coiled-coil domain-containing protein 92	ENOG410ZQ07,-;ENOG410IIA1,-	GO:0043231,cellular_component,intracellular membrane-bounded organelle;GO:0005813,cellular_component,centrosome;GO:0005814,cellular_component,centriole;GO:0005654,cellular_component,nucleoplasm	-
GPN2	2.09846	0.329045	2.64772	2.78875	2.16e-05	7.65e-05	ENSG00000142751	G1RDX4,GPN-loop GTPase 2	XP_003271714.1,-	PF03029,Conserved hypothetical ATP binding protein	IPR004130,GPN-loop GTPase;IPR030231,GPN-loop GTPase 2;IPR027417,P-loop containing nucleoside triphosphate hydrolase	ENOG410YRVC,-;KOG1533,Predicted GTPase	-	-
TUBGCP5	1.61288	0.252905	2.64772	2.78875	2.16e-05	7.65e-05	ENSG00000275835	A0A087X1Z1,Gamma-tubulin complex component	-	PF04130,Spc97 / Spc98 family	IPR007259,Gamma-tubulin complex component protein	ENOG410ZYW9,-;KOG4344,Uncharacterized conserved protein	GO:0005874,cellular_component,microtubule;GO:0007020,biological_process,microtubule nucleation;GO:0005737,cellular_component,cytoplasm;GO:0000226,biological_process,microtubule cytoskeleton organization;GO:0043015,molecular_function,gamma-tubulin binding;GO:0005856,cellular_component,cytoskeleton;GO:0005815,cellular_component,microtubule organizing center;GO:0000922,cellular_component,spindle pole	-
AMER1	1.2375	0.194044	2.64772	2.78875	2.16e-05	7.65e-05	ENSG00000184675	G3RNF3,APC membrane recruitment protein 1	-	PF09422,WTX protein	-	-	-	-
ZNF827	3.1819	0.505114	2.64545	4.04924	1.82e-10	1.97e-09	ENSG00000151612	G3SHH4,Zinc finger protein 827	XP_018881127.1,zinc finger protein 827 isoform X3	PF00096,Zinc finger, C2H2 type	IPR013087,Zinc finger C2H2-type;IPR036236,Zinc finger C2H2 superfamily	-	GO:0003676,molecular_function,nucleic acid binding	-
ZNF362	88.0406	14.0666	2.645	7.41986	1.89e-27	4.34e-25	ENSG00000160094	A0A287D732,Zinc finger protein 362	XP_005317835.1,zinc finger protein 362	-	IPR013087,Zinc finger C2H2-type;IPR036236,Zinc finger C2H2 superfamily	-	GO:0003676,molecular_function,nucleic acid binding	-
PLEKHG2	4.69758	0.747927	2.6449	4.70686	7.28e-14	1.71e-12	ENSG00000090924	G3REQ9,Pleckstrin homology and RhoGEF domain containing G2	-	PF00621,RhoGEF domain;PF00169,PH domain	IPR011993,PH-like domain superfamily;IPR000219,Dbl homology (DH) domain;IPR001849,Pleckstrin homology domain;IPR035899,Dbl homology (DH) domain superfamily	-	GO:0005089,molecular_function,Rho guanyl-nucleotide exchange factor activity;GO:0030833,biological_process,regulation of actin filament polymerization;GO:0035023,biological_process,regulation of Rho protein signal transduction;GO:0065009,biological_process,regulation of molecular function	-
TTLL4	4.82027	0.767462	2.64389	4.49315	9.23e-13	1.69e-11	ENSG00000135912	A0A024R424,Tubulin tyrosine ligase-like family, member 4, isoform CRA_a	NP_055455.3,tubulin polyglutamylase TTLL4	PF03133,Tubulin-tyrosine ligase family	IPR013815,ATP-grasp fold, subdomain 1;IPR027748,Tubulin polyglutamylase TTLL-4;IPR004344,Tubulin-tyrosine ligase/Tubulin polyglutamylase	ENOG410XTI2,-;KOG2156,Tubulin-tyrosine ligase-related protein	GO:0070739,molecular_function,protein-glutamic acid ligase activity;GO:0018095,biological_process,protein polyglutamylation;GO:0018200,biological_process,peptidyl-glutamic acid modification;GO:0016874,molecular_function,ligase activity;GO:0015631,molecular_function,tubulin binding;GO:0005524,molecular_function,ATP binding;GO:0006464,biological_process,cellular protein modification process	-
PRG4	0.847399	0.129922	2.64311	1.67804	0.00639309	0.0127854	ENSG00000116690	A0A024R930,Proteoglycan 4, isoform CRA_a	-	PF01033,Somatomedin B domain;PF00045,Hemopexin	IPR000585,Hemopexin-like domain;IPR018486,Hemopexin, conserved site;IPR020436,Somatomedin B, chordata;IPR036375,Hemopexin-like domain superfamily;IPR001212,Somatomedin B domain;IPR036024,Somatomedin B-like domain superfamily;IPR018487,Hemopexin-like repeats	KOG1565,Gelatinase A and related matrix metalloproteases;ENOG410XQ5D,-	GO:0006955,biological_process,immune response;GO:0006898,biological_process,receptor-mediated endocytosis;GO:0005044,molecular_function,scavenger receptor activity;GO:0030247,molecular_function,polysaccharide binding	-
ADCK1	0.80389	0.123251	2.64311	1.67804	0.00639309	0.0127854	ENSG00000063761	H2Q8Q2,AarF domain containing kinase 1	XP_510098.3,uncharacterized aarF domain-containing protein kinase 1 isoform X1	PF03109,ABC1 family	IPR004147,UbiB domain;IPR011009,Protein kinase-like domain superfamily	KOG1235,Predicted unusual protein kinase;COG0661,Predicted unusual protein kinase	GO:0016301,molecular_function,kinase activity;GO:0016310,biological_process,phosphorylation	-
TBC1D3L	1.90137	0.291516	2.64311	1.67804	0.00639309	0.0127854	ENSG00000274512	A0A0G2JPY0,TBC1 domain family member 3K	-	PF00566,Rab-GTPase-TBC domain	IPR035969,Rab-GTPase-TBC domain superfamily;IPR000195,Rab-GTPase-TBC domain	-	GO:0012505,cellular_component,endomembrane system;GO:0090630,biological_process,activation of GTPase activity;GO:0005622,cellular_component,intracellular;GO:0031338,biological_process,regulation of vesicle fusion;GO:0005096,molecular_function,GTPase activator activity;GO:0017137,molecular_function,Rab GTPase binding;GO:0006886,biological_process,intracellular protein transport	-
CTD-2047H16.4	1.07313	0.164531	2.64311	1.67804	0.00639309	0.0127854	ENSG00000263069	Q6ZUT0,HCG2045502	-	-	-	-	-	-
TTC30A	0.715361	0.109678	2.64311	1.67804	0.00639309	0.0127854	ENSG00000197557	A0A0D9SBD8,Tetratricopeptide repeat domain 30A	XP_007963643.1,tetratricopeptide repeat protein 30A	PF14559,Tetratricopeptide repeat	IPR011990,Tetratricopeptide-like helical domain superfamily;IPR019734,Tetratricopeptide repeat;IPR013026,Tetratricopeptide repeat-containing domain	-	-	-
WDR5B	1.149	0.176163	2.64311	1.67804	0.00639309	0.0127854	ENSG00000196981	H2R2L6,WD repeat domain 5B	XP_516691.2,WD repeat-containing protein 5B	PF00400,WD domain, G-beta repeat	IPR019775,WD40 repeat, conserved site;IPR017986,WD40-repeat-containing domain;IPR036322,WD40-repeat-containing domain superfamily;IPR015943,WD40/YVTN repeat-like-containing domain superfamily;IPR020472,G-protein beta WD-40 repeat;IPR001680,WD40 repeat	ENOG410XP3K,-;KOG0266,WD40 repeat-containing protein	GO:0060271,biological_process,cilium assembly;GO:0036064,cellular_component,ciliary basal body	-
HOXA6	3.32629	0.509982	2.64311	1.67804	0.00639309	0.0127854	ENSG00000106006	A0A0D9RP79,Homeobox A6	XP_007980006.1,-	PF00046,Homeobox domain	IPR009057,Homeobox-like domain superfamily;IPR017995,Homeobox protein, antennapedia type;IPR017970,Homeobox, conserved site;IPR020479,Homeobox domain, metazoa;IPR001827,Homeobox protein, antennapedia type, conserved site;IPR001356,Homeobox domain	-	GO:0048706,biological_process,embryonic skeletal system development;GO:0003677,molecular_function,DNA binding;GO:0043565,molecular_function,sequence-specific DNA binding;GO:0003700,molecular_function,DNA binding transcription factor activity;GO:0005634,cellular_component,nucleus;GO:0006355,biological_process,regulation of transcription, DNA-templated;GO:0048704,biological_process,embryonic skelet…	-
QSER1	20.3949	3.26513	2.64179	6.97525	1.09e-25	2.11e-23	ENSG00000060749	G3R0G8,Glutamine and serine rich 1	XP_018892977.1,glutamine and serine-rich protein 1 isoform X3	PF13926,omain of unknown function (DUF4211)	IPR025451,Domain of unknown function DUF4211	-	-	-
RP11-29H23.5	5.78246	0.915626	2.64079	3.21842	4.14e-07	2.11e-06	ENSG00000246203	G3RVP1,Uncharacterized protein	-	-	IPR033277,GON-4-like protein	-	GO:0030183,biological_process,B cell differentiation;GO:0003714,molecular_function,transcription corepressor activity;GO:0045892,biological_process,negative regulation of transcription, DNA-templated;GO:0016021,cellular_component,integral component of membrane;GO:0016020,cellular_component,membrane	-
KRT8P46	10.1578	1.60845	2.64079	3.21842	4.14e-07	2.11e-06	ENSG00000248971	H2Q999,Tau tubulin kinase 2	-	PF00038,Intermediate filament protein;PF00069,Protein kinase domain;PF16208,Keratin type II head	IPR032444,Keratin type II head;IPR018039,Intermediate filament protein, conserved site;IPR011009,Protein kinase-like domain superfamily;IPR003054,Keratin, type II;IPR001664,Intermediate filament protein;IPR000719,Protein kinase domain	KOG1164,Casein kinase (serine/threonine/tyrosine protein kinase);ENOG410XPGP,-	GO:0018105,biological_process,peptidyl-serine phosphorylation;GO:0006468,biological_process,protein phosphorylation;GO:0005737,cellular_component,cytoplasm;GO:0005634,cellular_component,nucleus;GO:0045095,cellular_component,keratin filament;GO:0004674,molecular_function,protein serine/threonine kinase activity;GO:0005198,molecular_function,structural molecule activity;GO:0008360,biological_proces…	-
CACHD1	5.50144	0.8779	2.64021	4.41146	3.39e-12	5.41e-11	ENSG00000158966	A0A0A0MQY7,VWFA and cache domain-containing protein 1	NP_065976.2,VWFA and cache domain-containing protein 1 isoform 1	PF00092,von Willebrand factor type A domain;PF08399,VWA N-terminal	IPR002035,von Willebrand factor, type A;IPR036465,von Willebrand factor A-like domain superfamily;IPR013608,VWA N-terminal;IPR029151,Periplasmic sensor-like domain superfamily	ENOG410XPDX,-;KOG2353,L-type voltage-dependent Ca2+ channel, alpha2/delta subunit	GO:0016021,cellular_component,integral component of membrane;GO:0016020,cellular_component,membrane	-
SEC24D	3.51881	0.56152	2.64021	4.41146	3.39e-12	5.41e-11	ENSG00000150961	A8K6V0,cDNA FLJ78676, highly similar to Homo sapiens SEC24 related gene family, member D	NP_055637.2,protein transport protein Sec24D isoform 1	PF04815,Sec23/Sec24 helical domain;PF04811,Sec23/Sec24 trunk domain;PF08033,Sec23/Sec24 beta-sandwich domain;PF00626,elsolin repeat;PF04810,Sec23/Sec24 zinc finger	IPR007123,Gelsolin-like domain;IPR036180,Gelsolin-like domain superfamily;IPR036465,von Willebrand factor A-like domain superfamily;IPR006900,Sec23/Sec24, helical domain;IPR029006,ADF-H/Gelsolin-like domain superfamily;IPR006895,Zinc finger, Sec23/Sec24-type;IPR036175,Sec23/Sec24 helical domain superfamily;IPR006896,Sec23/Sec24, trunk domain;IPR012990,Sec23/Sec24 beta-sandwich	COG5028,Vesicle coat complex COPII, subunit SEC24/subunit SFB2/subunit SFB3;KOG1985,Vesicle coat complex COPII, subunit SEC24/subunit SFB2	GO:0006888,biological_process,ER to Golgi vesicle-mediated transport;GO:0015031,biological_process,protein transport;GO:0030127,cellular_component,COPII vesicle coat;GO:0008270,molecular_function,zinc ion binding;GO:0006886,biological_process,intracellular protein transport	K14007,ko04141,Protein processing in endoplasmic reticulum
MBNL1	35.3492	5.67482	2.6383	7.68704	3.49e-28	8.51e-26	ENSG00000152601	A0A0A0MQX8,Muscleblind-like protein 1	XP_005247521.1,muscleblind-like protein 1 isoform X5;XP_016861912.1,-;XP_016861913.1,-	PF00642,Zinc finger C-x8-C-x5-C-x3-H type (and similar)	IPR000571,Zinc finger, CCCH-type	ENOG410ZNRC,-;KOG2494,C3H1-type Zn-finger protein	GO:0005829,cellular_component,cytosol;GO:0046872,molecular_function,metal ion binding;GO:0005654,cellular_component,nucleoplasm	-
RAD18	2.65243	0.422307	2.63688	3.54734	3.24e-08	2.14e-07	ENSG00000070950	A0A024R2I7,RAD18 homolog	-	PF02037,SAP domain;PF13923,Zinc finger, C3HC4 type (RING finger)	IPR017907,Zinc finger, RING-type, conserved site;IPR036361,SAP domain superfamily;IPR006642,Zinc finger, Rad18-type putative;IPR001841,Zinc finger, RING-type;IPR013083,Zinc finger, RING/FYVE/PHD-type;IPR003034,SAP domain	COG5432,RING-finger-containing E3 ubiquitin ligase;KOG0287,Postreplication repair protein RAD18	GO:0006281,biological_process,DNA repair;GO:0003677,molecular_function,DNA binding	-
RP11-552F3.4	9.33832	1.47264	2.63332	2.496	5.25e-05	0.000169653	ENSG00000266980	F6SJ14,Unkempt family zinc finger	XP_001492089.3,RING finger protein unkempt homolog isoform X4	PF00642,Zinc finger C-x8-C-x5-C-x3-H type (and similar)	IPR036855,Zinc finger, CCCH-type superfamily;IPR000571,Zinc finger, CCCH-type	KOG1100,Predicted E3 ubiquitin ligase;KOG1595,CCCH-type Zn-finger protein;ENOG410XR0Z,-	GO:0048667,biological_process,cell morphogenesis involved in neuron differentiation;GO:0046872,molecular_function,metal ion binding;GO:0005844,cellular_component,polysome;GO:1990715,molecular_function,mRNA CDS binding;GO:2000766,biological_process,negative regulation of cytoplasmic translation;GO:0001764,biological_process,neuron migration	-
C2orf47	5.11768	0.807053	2.63332	2.496	5.25e-05	0.000169653	ENSG00000162972	A0A024R3U8,Uncharacterized protein	NP_078796.2,m-AAA protease-interacting protein 1, mitochondrial precursor	-	-	ENOG4111MUA,-;ENOG410IHVH,-	-	-
TOX	2.01189	0.317273	2.63332	2.496	5.25e-05	0.000169653	ENSG00000198846	H2QW77,Thymocyte selection-associated high mobility group box	XP_519777.2,-	PF00505,HMG (high mobility group) box	IPR009071,High mobility group box domain;IPR036910,High mobility group box domain superfamily	KOG0381,HMG box-containing protein;COG5648,Chromatin-associated proteins containing the HMG domain	GO:0003677,molecular_function,DNA binding;GO:0005634,cellular_component,nucleus	-
SDC3	10.954	1.76188	2.63293	5.5251	3.8e-18	2.21e-16	ENSG00000162512	G1QK95,Syndecan	-	PF01034,Syndecan domain	IPR031194,Syndecan-3;IPR030479,Syndecan, conserved site;IPR001050,Syndecan;IPR003585,Neurexin/syndecan/glycophorin C;IPR027789,Syndecan/Neurexin domain	ENOG410Y2QY,-;ENOG410IJZ0,-	GO:0031012,cellular_component,extracellular matrix;GO:0042802,molecular_function,identical protein binding;GO:0016021,cellular_component,integral component of membrane;GO:0016020,cellular_component,membrane	-
STIL	10.878	1.75269	2.63052	5.55962	2.2e-18	1.35e-16	ENSG00000123473	H2R409,SCL/TAL1 interrupting locus	-	PF15253,SCL-interrupting locus protein N-terminus	IPR026123,SCL-interrupting locus protein	ENOG4111HAF,-;ENOG410IF1P,-	-	-
HMGA2	25.5297	4.1269	2.62839	7.84287	1.4e-28	3.46e-26	ENSG00000149948	F5H6H0,High mobility group protein HMGI-C	NP_001287848.1,high mobility group protein HMGI-C isoform d	PF02178,AT hook motif	IPR000637,HMG-I/HMG-Y, DNA-binding, conserved site;IPR000116,High mobility group protein HMGA;IPR017956,AT hook, DNA-binding motif	ENOG410IZGR,-;ENOG410YWK3,-	GO:0019899,molecular_function,enzyme binding;GO:0003677,molecular_function,DNA binding;GO:0000785,cellular_component,chromatin;GO:0046426,biological_process,negative regulation of JAK-STAT cascade;GO:0000122,biological_process,negative regulation of transcription by RNA polymerase II;GO:0006355,biological_process,regulation of transcription, DNA-templated;GO:0033144,biological_process,negative re…	-
ZFP1	4.35649	0.696971	2.6282	3.38398	2.18e-07	1.19e-06	ENSG00000184517	H2PYS1,Zinc finger protein 1 homolog	XP_523420.3,-;XP_009429530.1,-	PF00096,Zinc finger, C2H2 type;PF01352,KRAB box;PF13465,Zinc-finger double domain	IPR013087,Zinc finger C2H2-type;IPR001909,Krueppel-associated box;IPR036051,KRAB domain superfamily;IPR036236,Zinc finger C2H2 superfamily	KOG1721,FOG: Zn-finger;COG5048,FOG: Zn-finger	GO:0006355,biological_process,regulation of transcription, DNA-templated;GO:0003676,molecular_function,nucleic acid binding;GO:0003700,molecular_function,DNA binding transcription factor activity;GO:0046872,molecular_function,metal ion binding;GO:0005622,cellular_component,intracellular	-
ZNF275	3.00509	0.483101	2.62646	3.92506	8.89e-10	8.26e-09	ENSG00000063587	A6NFS0,Zinc finger protein 275	NP_001073954.3,zinc finger protein 275	PF00096,Zinc finger, C2H2 type	IPR013087,Zinc finger C2H2-type;IPR036236,Zinc finger C2H2 superfamily	KOG1721,FOG: Zn-finger;COG5048,FOG: Zn-finger	GO:0003676,molecular_function,nucleic acid binding	-
ZSWIM6	6.64768	1.07216	2.62529	4.47764	1.57e-12	2.71e-11	ENSG00000130449	I3LGU4,Zinc finger SWIM-type containing 6	-	-	IPR007527,Zinc finger, SWIM-type	KOG3615,Uncharacterized conserved protein;ENOG410XPZG,-	GO:0008270,molecular_function,zinc ion binding	-
TBC1D22B	15.2271	2.46079	2.62457	4.9865	3.08e-15	9.99e-14	ENSG00000065491	G3QG54,TBC1 domain family member 22B	XP_004043989.1,TBC1 domain family member 22B isoform X1	PF00566,Rab-GTPase-TBC domain	IPR035969,Rab-GTPase-TBC domain superfamily;IPR000195,Rab-GTPase-TBC domain	-	-	-
DTX2	10.8322	1.75464	2.62138	5.03644	1.44e-15	5.04e-14	ENSG00000091073	H2QUT5,Deltex homolog 2	XP_016812277.1,probable E3 ubiquitin-protein ligase DTX2 isoform X2;XP_009451489.2,-;XP_009451490.2,-	PF02825,WWE domain;PF00097,Zinc finger, C3HC4 type (RING finger)	IPR037197,WWE domain superfamily;IPR004170,WWE domain;IPR001841,Zinc finger, RING-type;IPR013083,Zinc finger, RING/FYVE/PHD-type;IPR018957,Zinc finger, C3HC4 RING-type;IPR018123,WWE domain, subgroup	ENOG410IEMS,-;ENOG4111EY2,-	GO:0031965,cellular_component,nuclear membrane;GO:0007219,biological_process,Notch signaling pathway;GO:0008270,molecular_function,zinc ion binding;GO:0046872,molecular_function,metal ion binding;GO:0005654,cellular_component,nucleoplasm	-
GPHN	5.73193	0.927298	2.62047	4.39502	4.46e-12	6.92e-11	ENSG00000171723	E2R034,Gephyrin	-	PF03453,MoeA N-terminal region (domain I and II);PF00994,Probable molybdopterin binding domain;PF03454,MoeA C-terminal region (domain IV)	IPR036688,MoeA, C-terminal, domain IV superfamily;IPR008284,Molybdenum cofactor biosynthesis, conserved site;IPR036425,MoaB/Mog-like domain superfamily;IPR036135,MoeA, N-terminal and linker domain superfamily;IPR001453,MoaB/Mog domain;IPR005110,MoeA, N-terminal and linker domain;IPR005111,MoeA, C-terminal, domain IV	COG0303,Molybdopterin biosynthesis enzyme;COG0521,Molybdopterin biosynthesis enzymes;KOG2371,Molybdopterin biosynthesis protein	GO:0045211,cellular_component,postsynaptic membrane;GO:0061599,molecular_function,molybdopterin molybdotransferase activity;GO:0072579,biological_process,glycine receptor clustering;GO:0018315,biological_process,molybdenum incorporation into molybdenum-molybdopterin complex;GO:0008940,molecular_function,nitrate reductase activity;GO:0005737,cellular_component,cytoplasm;GO:0010038,biological_proce…	-
ARHGAP21	57.7964	9.40718	2.61874	8.52627	3.94e-30	1.08e-27	ENSG00000107863	K7CIL6,Rho GTPase activating protein 21	-	PF00595,PDZ domain (Also known as DHR or GLGF);PF00620,RhoGAP domain;PF15410,Pleckstrin homology domain	IPR036034,PDZ superfamily;IPR001478,PDZ domain;IPR001849,Pleckstrin homology domain;IPR011993,PH-like domain superfamily;IPR000198,Rho GTPase-activating protein domain;IPR008936,Rho GTPase activation protein	ENOG410YY7B,-;ENOG410IPXX,-	GO:0043547,biological_process,positive regulation of GTPase activity;GO:0007165,biological_process,signal transduction;GO:0005096,molecular_function,GTPase activator activity	-
RP5-1047A19.4	41.6502	6.71747	2.6183	3.5322	4.62e-08	2.93e-07	ENSG00000255164	H2REU4,Uncharacterized protein	-	-	-	-	-	-
C16orf52	2.32728	0.374656	2.617	3.19924	6.09e-07	3.02e-06	ENSG00000185716	G3PCD0,Chromosome 16 open reading frame 52	-	-	IPR037663,Uncharacterized protein C16orf52	ENOG410Z2QM,-;ENOG410IJ25,-	GO:0016021,cellular_component,integral component of membrane;GO:0016020,cellular_component,membrane	-
RP5-1187M17.10	2.64089	0.425143	2.617	3.19924	6.09e-07	3.02e-06	ENSG00000088899	K6ZHY0,ProSAPiP1 protein	-	PF06818,ez1	IPR033295,Leucine zipper putative tumor suppressor 3	ENOG410Z2V9,-;ENOG410IFZY,-	GO:0014069,cellular_component,postsynaptic density	-
B3GLCT	2.23627	0.358808	2.61467	2.76259	2.16e-05	7.65e-05	ENSG00000187676	K6ZXU9,Beta 1,3-galactosyltransferase-like	-	PF02434,ringe-like	IPR029044,Nucleotide-diphospho-sugar transferases;IPR003378,Fringe-like	ENOG410XWFG,-;ENOG410IE18,-	GO:0016757,molecular_function,transferase activity, transferring glycosyl groups;GO:0016740,molecular_function,transferase activity;GO:0016020,cellular_component,membrane	-
WDR35	1.30306	0.209076	2.61467	2.76259	2.16e-05	7.65e-05	ENSG00000118965	H2R3M3,WD repeat-containing protein 35	XP_515315.5,WD repeat-containing protein 35 isoform X1	PF12894,Anaphase-promoting complex subunit 4 WD40 domain	IPR017986,WD40-repeat-containing domain;IPR017233,WD repeat protein 35;IPR024977,Anaphase-promoting complex subunit 4, WD40 domain;IPR036322,WD40-repeat-containing domain superfamily;IPR015943,WD40/YVTN repeat-like-containing domain superfamily;IPR011990,Tetratricopeptide-like helical domain superfamily;IPR001680,WD40 repeat	KOG2041,WD40 repeat protein;ENOG410XNSQ,-	GO:0005930,cellular_component,axoneme;GO:0005737,cellular_component,cytoplasm;GO:0042995,cellular_component,cell projection;GO:0005929,cellular_component,cilium;GO:0030991,cellular_component,intraciliary transport particle A;GO:0005856,cellular_component,cytoskeleton;GO:0005815,cellular_component,microtubule organizing center;GO:0030030,biological_process,cell projection organization;GO:0035091,m…	-
CSNK1G1	7.04165	1.14709	2.61421	5.35298	4.99e-17	2.35e-15	ENSG00000169118	U3KQB3,Casein kinase I isoform gamma-1	NP_001316534.1,casein kinase I isoform gamma-1 isoform 2	PF00069,Protein kinase domain;PF12605,Casein kinase 1 gamma C terminal	IPR022247,Casein kinase 1 gamma C-terminal;IPR011009,Protein kinase-like domain superfamily;IPR017441,Protein kinase, ATP binding site;IPR008271,Serine/threonine-protein kinase, active site;IPR000719,Protein kinase domain	-	GO:0004672,molecular_function,protein kinase activity;GO:0006468,biological_process,protein phosphorylation;GO:0000166,molecular_function,nucleotide binding;GO:0004674,molecular_function,protein serine/threonine kinase activity;GO:0005524,molecular_function,ATP binding	-
FIGN	2.03019	0.329575	2.61032	3.66638	1.05e-08	7.73e-08	ENSG00000182263	G3QL88,Fidgetin, microtubule severing factor	-	PF09336,Vps4 C terminal oligomerisation domain;PF00004,ATPase family associated with various cellular activities (AAA)	-	-	-	-
RP11-855A2.2	2.88638	0.459556	2.60932	2.12532	0.000672116	0.00168611	ENSG00000279880	G1QM82,Bromodomain PHD finger transcription factor	-	PF15612,WSTF, HB1, Itc1p, MBD9 motif 1;PF00439,Bromodomain;PF00628,PHD-finger;PF02791,T domain;PF15613,Williams-Beuren syndrome DDT (WSD), D-TOX E motif	IPR028941,WHIM2 domain;IPR001965,Zinc finger, PHD-type;IPR011011,Zinc finger, FYVE/PHD-type;IPR028942,WHIM1 domain;IPR038028,Nucleosome-remodeling factor subunit BPTF;IPR013083,Zinc finger, RING/FYVE/PHD-type;IPR018501,DDT domain;IPR036427,Bromodomain-like superfamily;IPR001487,Bromodomain;IPR019787,Zinc finger, PHD-finger;IPR018359,Bromodomain, conserved site;IPR019786,Zinc finger, PHD-type, con…	KOG1632,Uncharacterized PHD Zn-finger protein;COG5076,Transcription factor involved in chromatin remodeling, contains bromodomain;KOG1473,Nucleosome remodeling factor, subunit NURF301/BPTF	GO:0035064,molecular_function,methylated histone binding;GO:0016589,cellular_component,NURF complex;GO:0046872,molecular_function,metal ion binding	-
FAM188B	0.841598	0.133995	2.60932	2.12532	0.000672116	0.00168611	ENSG00000106125	H2QUD5,Family with sequence similarity 188, member B	XP_527714.3,protein FAM188B isoform X1	PF13898,omain of unknown function (DUF4205)	IPR025257,Domain of unknown function DUF4205	ENOG410XSGV,-;KOG2871,Uncharacterized conserved protein	-	-
ZBTB38	4.91826	0.805183	2.60714	5.38771	3.24e-17	1.56e-15	ENSG00000177311	K7CDJ0,Zinc finger and BTB domain containing 38	-	PF00096,Zinc finger, C2H2 type;PF00651,BTB/POZ domain	-	-	-	-
SLC25A23	27.5628	4.5181	2.60704	6.30537	3.94e-22	4.63e-20	ENSG00000125648	G3QVW8,Solute carrier family 25 member 23	XP_018871052.1,calcium-binding mitochondrial carrier protein SCaMC-3 isoform X3	PF00153,Mitochondrial carrier protein;PF13499,-hand domain pair;PF13202,hand	IPR023395,Mitochondrial carrier domain superfamily;IPR018247,EF-Hand 1, calcium-binding site;IPR002067,Mitochondrial carrier protein;IPR002048,EF-hand domain;IPR018108,Mitochondrial substrate/solute carrier;IPR011992,EF-hand domain pair	-	GO:0055085,biological_process,transmembrane transport;GO:0016020,cellular_component,membrane;GO:0016021,cellular_component,integral component of membrane;GO:0005509,molecular_function,calcium ion binding	-
TAB3	13.3572	2.19113	2.60639	6.64349	1.31e-23	1.92e-21	ENSG00000157625	H2R4S6,TGF-beta activated kinase 1/MAP3K7 binding protein 3	XP_003317455.1,-	PF02845,CUE domain	IPR003892,Ubiquitin system component Cue;IPR001876,Zinc finger, RanBP2-type;IPR036443,Zinc finger, RanBP2-type superfamily	ENOG410IG4E,-;ENOG410XPAC,-	GO:0016301,molecular_function,kinase activity;GO:0016310,biological_process,phosphorylation;GO:0046872,molecular_function,metal ion binding	K12793,ko04621,NOD-like receptor signaling pathway;K12793,ko04668,TNF signaling pathway;K12793,ko04064,NF-kappa B signaling pathway
MBNL2	15.0469	2.47016	2.60337	5.46261	9.87e-18	5.3e-16	ENSG00000139793	G3QZ59,Muscleblind like splicing regulator 2	XP_004054709.1,-	PF14608,RNA-binding, Nab2-type zinc finger;PF00642,Zinc finger C-x8-C-x5-C-x3-H type (and similar)	IPR000571,Zinc finger, CCCH-type	-	GO:0046872,molecular_function,metal ion binding	-
SEMA7A	2.81051	0.45625	2.60199	2.98658	5.16e-06	2.09e-05	ENSG00000138623	H2NNR6,Semaphorin 7A	XP_002825703.1,semaphorin-7A	PF01437,Plexin repeat;PF13895,Immunoglobulin domain;PF01403,Sema domain	IPR001627,Sema domain;IPR036352,Sema domain superfamily;IPR016201,PSI domain;IPR002165,Plexin repeat;IPR015943,WD40/YVTN repeat-like-containing domain superfamily;IPR036179,Immunoglobulin-like domain superfamily;IPR013783,Immunoglobulin-like fold;IPR027231,Semaphorin;IPR007110,Immunoglobulin-like domain	KOG3611,Semaphorins;ENOG410XQZC,-	GO:0045773,biological_process,positive regulation of axon extension;GO:0050727,biological_process,regulation of inflammatory response;GO:0009897,cellular_component,external side of plasma membrane;GO:0070374,biological_process,positive regulation of ERK1 and ERK2 cascade;GO:0048675,biological_process,axon extension;GO:0021988,biological_process,olfactory lobe development;GO:0060907,biological_pro…	K06529,ko04360,Axon guidance
PCDH7	0.98869	0.160501	2.60199	2.98658	5.16e-06	2.09e-05	ENSG00000169851	K7BAH5,Protocadherin 7	-	PF08374,Protocadherin;PF08266,Cadherin-like;PF00028,Cadherin domain	IPR013585,Protocadherin;IPR020894,Cadherin conserved site;IPR002126,Cadherin;IPR013164,Cadherin, N-terminal;IPR015919,Cadherin-like	ENOG410XPHP,-;ENOG410II7Q,-	GO:0007155,biological_process,cell adhesion;GO:0007156,biological_process,homophilic cell adhesion via plasma membrane adhesion molecules;GO:0005509,molecular_function,calcium ion binding;GO:0005886,cellular_component,plasma membrane;GO:0016020,cellular_component,membrane;GO:0016021,cellular_component,integral component of membrane	-
ZNF92	5.13866	0.839684	2.59948	3.51689	6.58e-08	4.03e-07	ENSG00000146757	H2QFX6,Uncharacterized protein	XP_016814196.1,-;XP_003318510.1,zinc finger protein 92 isoform X1	PF00096,Zinc finger, C2H2 type;PF01352,KRAB box	IPR013087,Zinc finger C2H2-type;IPR001909,Krueppel-associated box;IPR036051,KRAB domain superfamily;IPR036236,Zinc finger C2H2 superfamily	KOG1721,FOG: Zn-finger;COG5048,FOG: Zn-finger	GO:0006355,biological_process,regulation of transcription, DNA-templated;GO:0003676,molecular_function,nucleic acid binding;GO:0046872,molecular_function,metal ion binding;GO:0005622,cellular_component,intracellular	-
TFPI	21.1432	3.49649	2.5952	7.1847	8.87e-26	1.76e-23	ENSG00000003436	G3RM61,Tissue factor pathway inhibitor	XP_004032983.1,tissue factor pathway inhibitor isoform X2;XP_004032985.1,-	PF00014,Kunitz/Bovine pancreatic trypsin inhibitor domain	IPR008296,Tissue factor pathway inhibitor-like;IPR029864,Tissue factor pathway inhibitor 1;IPR002223,Pancreatic trypsin inhibitor Kunitz domain;IPR020901,Proteinase inhibitor I2, Kunitz, conserved site;IPR036880,Pancreatic trypsin inhibitor Kunitz domain superfamily	-	GO:0010951,biological_process,negative regulation of endopeptidase activity;GO:0010466,biological_process,negative regulation of peptidase activity;GO:0005901,cellular_component,caveola;GO:0004867,molecular_function,serine-type endopeptidase inhibitor activity;GO:0071383,biological_process,cellular response to steroid hormone stimulus;GO:0009986,cellular_component,cell surface;GO:0007596,biologic…	K03909,ko04610,Complement and coagulation cascades
PPARGC1B	1.08698	0.177954	2.59281	3.17979	8.98e-07	4.28e-06	ENSG00000155846	H2QRS1,Uncharacterized protein	-	PF00076,RNA recognition motif. (a.k.a. RRM, RBD, or RNP domain)	IPR034621,Peroxisome proliferator-activated receptor gamma coactivator 1-beta;IPR012677,Nucleotide-binding alpha-beta plait domain superfamily;IPR034177,PPARGC1B, RNA recognition motif;IPR000504,RNA recognition motif domain;IPR034605,PGC-1;IPR035979,RNA-binding domain superfamily	ENOG4111PZ5,-;ENOG410IIJJ,-	GO:0030331,molecular_function,estrogen receptor binding;GO:0003712,molecular_function,transcription cofactor activity;GO:0003676,molecular_function,nucleic acid binding;GO:0045944,biological_process,positive regulation of transcription by RNA polymerase II;GO:0003723,molecular_function,RNA binding;GO:0008134,molecular_function,transcription factor binding;GO:0051091,biological_process,positive re…	K17962,ko04931,Insulin resistance
FLVCR2	1.64332	0.266773	2.59167	2.46362	8.22e-05	0.00025344	ENSG00000119686	G3RS74,Feline leukemia virus subgroup C cellular receptor family member 2	XP_004055519.1,feline leukemia virus subgroup C receptor-related protein 2 isoform X1	-	IPR036259,MFS transporter superfamily;IPR020846,Major facilitator superfamily domain;IPR011701,Major facilitator superfamily	-	GO:0055085,biological_process,transmembrane transport;GO:0015232,molecular_function,heme transporter activity;GO:0020037,molecular_function,heme binding;GO:0015886,biological_process,heme transport;GO:0016021,cellular_component,integral component of membrane	-
NPIPB4	1.03868	0.168616	2.59167	2.46362	8.22e-05	0.00025344	ENSG00000185864	A0A067ZXQ4,Nuclear pore complex-interacting protein B type	-	PF06409,Nuclear pore complex interacting protein (NPIP)	IPR009443,Nuclear pore complex interacting protein	COG5069,Ca2+-binding actin-bundling protein fimbrin/plastin (EF-Hand superfamily);ENOG410J0WZ,-	-	-
C6orf136	7.51172	1.23763	2.58586	3.34972	4.53e-07	2.3e-06	ENSG00000204564	H2QSM3,Chromosome 6 open reading frame 136	XP_009449167.1,uncharacterized protein C6orf136 homolog	PF10184,Uncharacterized conserved protein (DUF2358)	IPR018790,Protein of unknown function DUF2358	KOG4457,Uncharacterized conserved protein;ENOG4111RAP,-	-	-
EYA1	15.2489	2.53511	2.58543	5.55718	5.84e-18	3.27e-16	ENSG00000104313	A0A024R813,Eyes absent homolog	XP_016868695.1,-;NP_742055.1,-;NP_000494.2,eyes absent homolog 1 isoform 1	-	IPR028471,Eyes absent homologue 1;IPR028472,Eyes absent family;IPR006545,EYA domain;IPR038102,EYA domain superfamily	KOG3107,Predicted haloacid dehalogenase-like hydrolase (eyes absent);ENOG410XT12,-	GO:0042474,biological_process,middle ear morphogenesis;GO:0032991,cellular_component,protein-containing complex;GO:0060037,biological_process,pharyngeal system development;GO:0071600,biological_process,otic vesicle morphogenesis;GO:0006355,biological_process,regulation of transcription, DNA-templated;GO:0072513,biological_process,positive regulation of secondary heart field cardioblast proliferat…	K15616,ko05202,Transcriptional misregulation in cancer
ATMIN	30.7917	5.12792	2.58481	6.82811	3.34e-24	5.43e-22	ENSG00000166454	G1RHM9,ATM interactor	-	-	IPR013087,Zinc finger C2H2-type	KOG1721,FOG: Zn-finger;COG5048,FOG: Zn-finger	GO:0003676,molecular_function,nucleic acid binding	-
STXBP1	3.98796	0.661735	2.58469	4.51834	1.26e-12	2.25e-11	ENSG00000136854	A0A096P203,Syntaxin binding protein 1	XP_003911968.1,-	PF00995,Sec1 family	IPR027482,Sec1-like, domain 2;IPR036045,Sec1-like superfamily;IPR001619,Sec1-like protein	-	GO:0006887,biological_process,exocytosis;GO:0019905,molecular_function,syntaxin binding;GO:0007412,biological_process,axon target recognition;GO:0005886,cellular_component,plasma membrane;GO:0071346,biological_process,cellular response to interferon-gamma;GO:0002576,biological_process,platelet degranulation;GO:0060292,biological_process,long term synaptic depression;GO:0007274,biological_process,…	-
RP11-131M11.3	0.619821	0.09503	2.58434	0.919398	0.0433314	0.0692554	ENSG00000279179	F7I4T2,Latent transforming growth factor beta binding protein 4	-	-	-	-	-	-
SZT2-AS1	3.05743	0.46876	2.58434	0.919398	0.0433314	0.0692554	ENSG00000229372	H2R1G4,Uncharacterized protein	-	-	IPR033228,Protein SZT2	ENOG410XTCX,-;ENOG410IE3I,-	GO:0005777,cellular_component,peroxisome	-
GBP4	0.348807	0.0534786	2.58434	0.919398	0.0433314	0.0692554	ENSG00000162654	D3DT27,Guanylate binding protein 4, isoform CRA_a	-	PF02841,uanylate-binding protein, C-terminal domain;PF02263,uanylate-binding protein, N-terminal domain	IPR027417,P-loop containing nucleoside triphosphate hydrolase;IPR003191,Guanylate-binding protein/Atlastin, C-terminal;IPR030386,GB1/RHD3-type guanine nucleotide-binding (G) domain;IPR015894,Guanylate-binding protein, N-terminal;IPR036543,Guanylate-binding protein, C-terminal domain superfamily;IPR037684,Guanylate-binding protein, C-terminal	ENOG410XR6Z,-;KOG2037,Guanylate-binding protein	GO:0005525,molecular_function,GTP binding;GO:0003924,molecular_function,GTPase activity;GO:0000166,molecular_function,nucleotide binding	-
RP11-101E13.5	3.09282	0.474187	2.58434	0.919398	0.0433314	0.0692554	-	-	-	-	-	-	-	-
RYR2	0.120219	0.0184319	2.58434	0.919398	0.0433314	0.0692554	ENSG00000198626	H2R0U9,Uncharacterized protein	-	PF02026,RyR domain;PF00622,SPRY domain;PF08709,Inositol 1,4,5-trisphosphate/ryanodine receptor;PF01365,RIH domain;PF06459,Ryanodine Receptor TM 4-6;PF08454,RyR and IP3R Homology associated;PF13833,-hand domain pair;PF02815,MIR domain;PF00520,Ion transport protein	IPR015925,Ryanodine receptor-related;IPR036300,Mir domain superfamily;IPR035910,RyR/IP3 receptor binding core, RIH domain superfamily;IPR009460,Ryanodine Receptor TM 4-6;IPR001870,B30.2/SPRY domain;IPR011992,EF-hand domain pair;IPR035764,Ryanodine receptor, SPRY domain 2;IPR013662,RyR/IP3R Homology associated domain;IPR002048,EF-hand domain;IPR016093,MIR motif;IPR013320,Concanavalin A-like lectin…	KOG2243,Ca2+ release channel (ryanodine receptor);ENOG410YCNW,-	GO:0005216,molecular_function,ion channel activity;GO:0006874,biological_process,cellular calcium ion homeostasis;GO:0005262,molecular_function,calcium channel activity;GO:0055085,biological_process,transmembrane transport;GO:0006816,biological_process,calcium ion transport;GO:0005509,molecular_function,calcium ion binding;GO:0006811,biological_process,ion transport;GO:0005886,cellular_component,…	-
CTSF	0.737963	0.113143	2.58434	0.919398	0.0433314	0.0692554	ENSG00000174080	G3RIV1,Cathepsin F	-	PF08246,Cathepsin propeptide inhibitor domain (I29);PF00112,Papain family cysteine protease	IPR025660,Cysteine peptidase, histidine active site;IPR013201,Cathepsin propeptide inhibitor domain (I29);IPR013128,Peptidase C1A;IPR000169,Cysteine peptidase, cysteine active site;IPR000668,Peptidase C1A, papain C-terminal	-	GO:0006508,biological_process,proteolysis;GO:0008234,molecular_function,cysteine-type peptidase activity	-
LINC00987	0.864539	0.13255	2.58434	0.919398	0.0433314	0.0692554	ENSG00000237248	F7FF95,Uncharacterized protein	XP_001118453.3,alpha-2-macroglobulin-like isoform X1	PF07678,A-macroglobulin complement component;PF07677,A-macroglobulin receptor	IPR001599,Alpha-2-macroglobulin;IPR008930,Terpenoid cyclases/protein prenyltransferase alpha-alpha toroid;IPR009048,Alpha-macroglobulin, receptor-binding;IPR036595,Alpha-macroglobulin, receptor-binding domain superfamily;IPR002890,Alpha-2-macroglobulin, N-terminal;IPR013783,Immunoglobulin-like fold;IPR019565,Alpha-2-macroglobulin, thiol-ester bond-forming;IPR014756,Immunoglobulin E-set;IPR011625,…	ENOG410XRED,-;KOG1366,Alpha-macroglobulin	GO:0004866,molecular_function,endopeptidase inhibitor activity;GO:0010951,biological_process,negative regulation of endopeptidase activity;GO:0005576,cellular_component,extracellular region;GO:0005615,cellular_component,extracellular space	-
RP5-1057I20.4	1.97883	0.303392	2.58434	0.919398	0.0433314	0.0692554	ENSG00000268069	Q6ZVP1,cDNA FLJ42272 fis, clone TKIDN2016309	-	-	-	ENOG410KCH5,-;ENOG4110NZ1,-	-	-
RP3-521E19.2	2.84573	0.436303	2.58434	0.919398	0.0433314	0.0692554	ENSG00000257494	U3F3B7,Putative E3 ubiquitin-protein ligase HECTD4	-	PF00632,HECT-domain (ubiquitin-transferase)	IPR000569,HECT domain;IPR035781,HECTD4, SPRY domain;IPR035983,HECT, E3 ligase catalytic domain	KOG1426,FOG: RCC1 domain;COG5184,Alpha-tubulin suppressor and related RCC1 domain-containing proteins	GO:0004842,molecular_function,ubiquitin-protein transferase activity;GO:0016874,molecular_function,ligase activity;GO:0016740,molecular_function,transferase activity;GO:0016567,biological_process,protein ubiquitination	-
RP6-114E22.1	5.38323	0.825349	2.58434	0.919398	0.0433314	0.0692554	ENSG00000266869	Q96AZ4,Secretory carrier-associated membrane protein	-	PF04144,SCAMP family	IPR007273,SCAMP	-	GO:0015031,biological_process,protein transport;GO:0016021,cellular_component,integral component of membrane;GO:0016020,cellular_component,membrane	-
GOLGA8A	0.316614	0.0485427	2.58434	0.919398	0.0433314	0.0692554	ENSG00000175265	C9J1B5,Golgin subfamily A member 8B	-	PF15070,Putative golgin subfamily A member 2-like protein 5	IPR024858,Golgin subfamily A	ENOG410ZIE4,-;KOG4725,Uncharacterized conserved protein	GO:0005829,cellular_component,cytosol;GO:0005794,cellular_component,Golgi apparatus	-
RP11-485O10.2	5.26389	0.807053	2.58434	0.919398	0.0433314	0.0692554	ENSG00000259670	A0A075B719,Centrosomal protein of 152 kDa	-	-	IPR029598,Centrosomal protein of 152kDa	ENOG410XQAW,-;ENOG410IGHC,-	GO:0098535,biological_process,de novo centriole assembly involved in multi-ciliated epithelial cell differentiation;GO:0005815,cellular_component,microtubule organizing center;GO:0007099,biological_process,centriole replication;GO:0098536,cellular_component,deuterosome	-
RP11-400F19.8	3.59788	0.551622	2.58434	0.919398	0.0433314	0.0692554	ENSG00000266929	K7ENX5,Alpha-N-acetylglucosaminidase	-	PF05089,Alpha-N-acetylglucosaminidase (NAGLU) tim-barrel domain	IPR024733,Alpha-N-acetylglucosaminidase, tim-barrel domain;IPR007781,Alpha-N-acetylglucosaminidase	KOG2233,Alpha-N-acetylglucosaminidase;ENOG410XNMK,-	-	-
RP11-1072C15.6	0.613592	0.0940751	2.58434	0.919398	0.0433314	0.0692554	ENSG00000279879	H2PFS8,Uncharacterized protein	-	-	-	-	-	-
RP11-159D12.3	3.67838	0.563965	2.58434	0.919398	0.0433314	0.0692554	-	-	-	-	-	-	-	-
ROCK1P1	0.807993	0.12388	2.58434	0.919398	0.0433314	0.0692554	ENSG00000263006	H9EPT5,Rho-associated protein kinase	NP_001248063.1,rho-associated protein kinase 1	PF00069,Protein kinase domain;PF08912,Rho Binding	IPR029876,Rho-associated protein kinase 1;IPR037310,Rho-associated protein kinase 1, HR1;IPR001849,Pleckstrin homology domain;IPR011993,PH-like domain superfamily;IPR011009,Protein kinase-like domain superfamily;IPR000961,AGC-kinase, C-terminal;IPR017441,Protein kinase, ATP binding site;IPR008271,Serine/threonine-protein kinase, active site;IPR020684,Rho-associated protein kinase 1/2;IPR002219,Pr…	ENOG410XR1Q,-;KOG0612,Rho-associated, coiled-coil containing protein kinase	GO:0030036,biological_process,actin cytoskeleton organization;GO:0016301,molecular_function,kinase activity;GO:0051492,biological_process,regulation of stress fiber assembly;GO:0035556,biological_process,intracellular signal transduction;GO:0017048,molecular_function,Rho GTPase binding;GO:0016740,molecular_function,transferase activity;GO:0046872,molecular_function,metal ion binding;GO:2000114,bi…	K04514,ko04071,Sphingolipid signaling pathway;K04514,ko04611,Platelet activation;K04514,ko05131,Shigellosis;K04514,ko04510,Focal adhesion;K04514,ko04062,Chemokine signaling pathway;K04514,ko04350,TGF-beta signaling pathway;K04514,ko04921,Oxytocin signaling pathway;K04514,ko04670,Leukocyte transendothelial migration;K04514,ko05132,Salmonella infection;K04514,ko04024,cAMP signaling pathway;K04514,k…
ABHD3	0.489496	0.0750489	2.58434	0.919398	0.0433314	0.0692554	ENSG00000158201	H2QEB8,Abhydrolase domain containing 3	XP_003315914.1,phospholipase ABHD3 isoform X1	PF12697,Alpha/beta hydrolase family;PF00561,alpha/beta hydrolase fold	IPR012020,AB hydrolase 4 family;IPR000952,AB hydrolase 4, conserved site;IPR000073,Alpha/beta hydrolase fold-1;IPR029058,Alpha/Beta hydrolase fold	KOG1838,Alpha/beta hydrolase;COG0429,Predicted hydrolase of the alpha/beta-hydrolase fold	GO:0004623,molecular_function,phospholipase A2 activity;GO:0046470,biological_process,phosphatidylcholine metabolic process;GO:0008970,molecular_function,phosphatidylcholine 1-acylhydrolase activity;GO:0016787,molecular_function,hydrolase activity;GO:0016020,cellular_component,membrane;GO:0016021,cellular_component,integral component of membrane	-
ZNF253	0.589394	0.090365	2.58434	0.919398	0.0433314	0.0692554	ENSG00000256771	A0A1W2PRC0,Zinc finger protein 253	-	-	IPR013087,Zinc finger C2H2-type;IPR001909,Krueppel-associated box;IPR036051,KRAB domain superfamily;IPR036236,Zinc finger C2H2 superfamily	-	GO:0006355,biological_process,regulation of transcription, DNA-templated;GO:0003676,molecular_function,nucleic acid binding;GO:0046872,molecular_function,metal ion binding;GO:0005622,cellular_component,intracellular	-
ZNF724P	0.64333	0.0986344	2.58434	0.919398	0.0433314	0.0692554	ENSG00000196081	H2QFW5,Uncharacterized protein	-	PF00096,Zinc finger, C2H2 type;PF01352,KRAB box	IPR013087,Zinc finger C2H2-type;IPR001909,Krueppel-associated box;IPR036051,KRAB domain superfamily;IPR036236,Zinc finger C2H2 superfamily	KOG1721,FOG: Zn-finger;COG5048,FOG: Zn-finger	GO:0006355,biological_process,regulation of transcription, DNA-templated;GO:0003676,molecular_function,nucleic acid binding;GO:0046872,molecular_function,metal ion binding;GO:0005622,cellular_component,intracellular	-
ZNF571	0.344367	0.0527978	2.58434	0.919398	0.0433314	0.0692554	ENSG00000180479	Q24JS6,Zinc finger protein 571	-	PF00096,Zinc finger, C2H2 type;PF01352,KRAB box	IPR013087,Zinc finger C2H2-type;IPR001909,Krueppel-associated box;IPR036051,KRAB domain superfamily;IPR036236,Zinc finger C2H2 superfamily	KOG1721,FOG: Zn-finger;COG5048,FOG: Zn-finger	GO:0006355,biological_process,regulation of transcription, DNA-templated;GO:0003676,molecular_function,nucleic acid binding;GO:0046872,molecular_function,metal ion binding;GO:0005622,cellular_component,intracellular	-
ZNF813	0.342271	0.0524765	2.58434	0.919398	0.0433314	0.0692554	ENSG00000198346	H2RBR4,Zinc finger protein 845	-	PF00096,Zinc finger, C2H2 type;PF01352,KRAB box	IPR013087,Zinc finger C2H2-type;IPR001909,Krueppel-associated box;IPR036051,KRAB domain superfamily;IPR036236,Zinc finger C2H2 superfamily	KOG1721,FOG: Zn-finger;COG5048,FOG: Zn-finger	GO:0006355,biological_process,regulation of transcription, DNA-templated;GO:0003676,molecular_function,nucleic acid binding;GO:0046872,molecular_function,metal ion binding;GO:0005622,cellular_component,intracellular	-
CYCSP6	7.07663	1.08498	2.58434	0.919398	0.0433314	0.0692554	ENSG00000214429	A0A091DK93,Cytochrome c, somatic	XP_010626552.1,-;XP_010626551.1,cytochrome c	PF00034,Cytochrome c	IPR036909,Cytochrome c-like domain superfamily;IPR009056,Cytochrome c-like domain;IPR002327,Cytochrome c, class IA/ IB	-	GO:0022900,biological_process,electron transport chain;GO:0046872,molecular_function,metal ion binding;GO:0009055,molecular_function,electron transfer activity;GO:0005739,cellular_component,mitochondrion;GO:0070469,cellular_component,respiratory chain;GO:0055114,biological_process,oxidation-reduction process;GO:0020037,molecular_function,heme binding	-
DNAH6	0.158143	0.0242462	2.58434	0.919398	0.0433314	0.0692554	ENSG00000115423	G3QN60,Dynein axonemal heavy chain 6	XP_004029568.2,dynein heavy chain 6, axonemal	PF12774,Hydrolytic ATP binding site of dynein motor region D1;PF12777,Microtubule-binding stalk of dynein motor;PF07728,AAA domain (dynein-related subfamily);PF03028,ynein heavy chain and region D6 of dynein motor;PF12780,P-loop containing dynein motor region D4;PF08393,ynein heavy chain, N-terminal region 2;PF12781,ATP-binding dynein motor region D5;PF12775,P-loop containing dynein motor region …	IPR035699,Dynein heavy chain, hydrolytic ATP-binding dynein motor region D1;IPR024743,Dynein heavy chain, coiled coil stalk;IPR026983,Dynein heavy chain;IPR027417,P-loop containing nucleoside triphosphate hydrolase;IPR004273,Dynein heavy chain domain;IPR013602,Dynein heavy chain, domain-2;IPR035706,Dynein heavy chain, ATP-binding dynein motor region D5;IPR011704,ATPase, dynein-related, AAA domain…	-	GO:0005858,cellular_component,axonemal dynein complex;GO:0005524,molecular_function,ATP binding;GO:0016887,molecular_function,ATPase activity;GO:0001539,biological_process,cilium or flagellum-dependent cell motility;GO:0007018,biological_process,microtubule-based movement;GO:0030286,cellular_component,dynein complex;GO:0003777,molecular_function,microtubule motor activity	-
TUBB1	0.61131	0.0937252	2.58434	0.919398	0.0433314	0.0692554	ENSG00000101162	H2QKN9,Tubulin beta chain	XP_001140173.1,tubulin beta-1 chain	PF03953,Tubulin C-terminal domain;PF00091,Tubulin/FtsZ family, GTPase domain	IPR017975,Tubulin, conserved site;IPR018316,Tubulin/FtsZ, 2-layer sandwich domain;IPR003008,Tubulin/FtsZ, GTPase domain;IPR008280,Tubulin/FtsZ, C-terminal;IPR036525,Tubulin/FtsZ, GTPase domain superfamily;IPR037103,Tubulin/FtsZ, C-terminal domain superfamily;IPR013838,Beta tubulin, autoregulation binding site;IPR000217,Tubulin;IPR023123,Tubulin, C-terminal;IPR002453,Beta tubulin	KOG1375,Beta tubulin;COG5023,Tubulin	GO:0051225,biological_process,spindle assembly;GO:0005874,cellular_component,microtubule;GO:0005737,cellular_component,cytoplasm;GO:0005525,molecular_function,GTP binding;GO:0007017,biological_process,microtubule-based process;GO:0005856,cellular_component,cytoskeleton;GO:0003924,molecular_function,GTPase activity;GO:0000166,molecular_function,nucleotide binding;GO:0005200,molecular_function,stru…	K07375,ko04540,Gap junction;K07375,ko05130,Pathogenic Escherichia coli infection;K07375,ko04145,Phagosome
TTC38	0.597301	0.0915773	2.58434	0.919398	0.0433314	0.0692554	ENSG00000075234	G3QFK0,Tetratricopeptide repeat domain 38	XP_004063701.2,tetratricopeptide repeat protein 38 isoform X2	-	IPR011990,Tetratricopeptide-like helical domain superfamily;IPR033891,Tetratricopeptide repeat protein 38	-	-	-
UBA7	0.470218	0.0720932	2.58434	0.919398	0.0433314	0.0692554	ENSG00000182179	K7BL13,Ubiquitin-like modifier activating enzyme 7	XP_016796602.1,ubiquitin-like modifier-activating enzyme 7 isoform X1	PF16191,Ubiquitin-activating enzyme E1 four-helix bundle;PF16190,Ubiquitin-activating enzyme E1 FCCH domain;PF00899,ThiF family;PF09358,Ubiquitin fold domain;PF10585,Ubiquitin-activating enzyme active site	IPR032420,Ubiquitin-activating enzyme E1, four-helix bundle;IPR033127,Ubiquitin-activating enzyme E1, Cys active site;IPR000594,THIF-type NAD/FAD binding fold;IPR035985,Ubiquitin-activating enzyme;IPR018075,Ubiquitin-activating enzyme E1;IPR018965,Ubiquitin-activating enzyme E1, C-terminal;IPR019572,Ubiquitin-activating enzyme, catalytic cysteine domain;IPR000011,Ubiquitin/SUMO-activating enzyme …	COG0476,Dinucleotide-utilizing enzymes involved in molybdopterin and thiamine biosynthesis family 2;KOG2012,Ubiquitin activating enzyme UBA1	GO:0019941,biological_process,modification-dependent protein catabolic process;GO:0032020,biological_process,ISG15-protein conjugation;GO:0016874,molecular_function,ligase activity;GO:0019782,molecular_function,ISG15 activating enzyme activity;GO:0008641,molecular_function,ubiquitin-like modifier activating enzyme activity;GO:0000166,molecular_function,nucleotide binding;GO:0005524,molecular_func…	K10698,ko05012,Parkinson's disease;K10698,ko04120,Ubiquitin mediated proteolysis
RP11-305O4.3	4.8682	0.746386	2.58434	0.919398	0.0433314	0.0692554	-	-	-	-	-	-	-	-
FGF2	0.315445	0.0483636	2.58434	0.919398	0.0433314	0.0692554	ENSG00000138685	A0A0A0MQV6,Fibroblast growth factor	-	-	IPR028223,Fibroblast growth factor 2;IPR008996,Cytokine IL1/FGF;IPR002209,Fibroblast growth factor family	ENOG4111IPH,-;KOG3885,Fibroblast growth factor	GO:0005104,molecular_function,fibroblast growth factor receptor binding;GO:0008543,biological_process,fibroblast growth factor receptor signaling pathway;GO:0008083,molecular_function,growth factor activity;GO:0010469,biological_process,regulation of signaling receptor activity;GO:0005576,cellular_component,extracellular region	-
RASGRF2	0.199696	0.030617	2.58434	0.919398	0.0433314	0.0692554	ENSG00000113319	H2QR63,Uncharacterized protein	XP_517672.2,ras-specific guanine nucleotide-releasing factor 2 isoform X1	PF00618,RasGEF N-terminal motif;PF00621,RhoGEF domain;PF00617,RasGEF domain;PF00169,PH domain	IPR000651,Ras-like guanine nucleotide exchange factor, N-terminal;IPR001895,Ras guanine-nucleotide exchange factors catalytic domain;IPR019804,Ras guanine-nucleotide exchange factor, conserved site;IPR036964,Ras guanine-nucleotide exchange factor catalytic domain superfamily;IPR001849,Pleckstrin homology domain;IPR011993,PH-like domain superfamily;IPR023578,Ras guanine nucleotide exchange factor …	ENOG410IQ6Q,-;ENOG410XPWA,-	GO:0005088,molecular_function,Ras guanyl-nucleotide exchange factor activity;GO:0034976,biological_process,response to endoplasmic reticulum stress;GO:0005085,molecular_function,guanyl-nucleotide exchange factor activity;GO:0046578,biological_process,regulation of Ras protein signal transduction;GO:0007264,biological_process,small GTPase mediated signal transduction;GO:0005783,cellular_component,…	-
HLA-F-AS1	0.5114	0.0784071	2.58434	0.919398	0.0433314	0.0692554	ENSG00000214922	Q69YQ6,Uncharacterized protein DKFZp762B162	-	PF00129,Class I Histocompatibility antigen, domains alpha 1 and 2	IPR011161,MHC class I-like antigen recognition-like;IPR037055,MHC class I-like antigen recognition-like superfamily;IPR011162,MHC classes I/II-like antigen recognition protein	-	-	-
RP11-390E23.6	1.01817	0.156105	2.58434	0.919398	0.0433314	0.0692554	ENSG00000272686	G7P0K0,Uncharacterized protein	-	PF00568,WH1 domain;PF00786,P21-Rho-binding domain;PF02205,WH2 motif	IPR000095,CRIB domain;IPR000697,WH1/EVH1 domain;IPR033927,WASP family, EVH1 domain;IPR036936,CRIB domain superfamily;IPR030214,Neural Wiskott-Aldrich syndrome protein;IPR011993,PH-like domain superfamily;IPR003124,WH2 domain;IPR011026,Wiscott-Aldrich syndrome protein, C-terminal	-	GO:2000601,biological_process,positive regulation of Arp2/3 complex-mediated actin nucleation;GO:0007015,biological_process,actin filament organization;GO:0003779,molecular_function,actin binding	-
RP11-180C16.1	0.572807	0.0878219	2.58434	0.919398	0.0433314	0.0692554	-	-	-	-	-	-	-	-
FAM86B3P	0.438838	0.067282	2.58434	0.919398	0.0433314	0.0692554	ENSG00000173295	Q9HBS9,Uncharacterized protein	-	-	-	-	-	-
CTD-2517M22.16	4.98168	0.763784	2.58434	0.919398	0.0433314	0.0692554	ENSG00000254578	G1SBX8,Uncharacterized protein	-	-	-	-	-	-
MIR4665	27.0524	4.14764	2.58434	0.919398	0.0433314	0.0692554	-	-	-	-	-	-	-	-
B4GALT1-AS1	2.53516	0.388687	2.58434	0.919398	0.0433314	0.0692554	-	-	-	-	-	-	-	-
PTENP1	0.53482	0.0819979	2.58434	0.919398	0.0433314	0.0692554	ENSG00000237984	A0A024QYS4,Mitochondrial PTENalpha	NP_001296406.1,phosphatase and tensin homolog	PF10409,C2 domain of PTEN tumour-suppressor protein;PF00782,ual specificity phosphatase, catalytic domain	IPR014020,Tensin phosphatase, C2 domain;IPR016130,Protein-tyrosine phosphatase, active site;IPR029021,Protein-tyrosine phosphatase-like;IPR000340,Dual specificity phosphatase, catalytic domain;IPR003595,Protein-tyrosine phosphatase, catalytic;IPR029023,Tensin-type phosphatase domain	-	GO:0006470,biological_process,protein dephosphorylation;GO:0035335,biological_process,peptidyl-tyrosine dephosphorylation;GO:0008138,molecular_function,protein tyrosine/serine/threonine phosphatase activity;GO:0004725,molecular_function,protein tyrosine phosphatase activity;GO:0016311,biological_process,dephosphorylation	-
ZXDB	0.362596	0.0555927	2.58434	0.919398	0.0433314	0.0692554	ENSG00000198455	H2PVU0,Zinc finger, X-linked, duplicated B	XP_002831772.1,zinc finger X-linked protein ZXDB	PF00096,Zinc finger, C2H2 type	IPR013087,Zinc finger C2H2-type;IPR036236,Zinc finger C2H2 superfamily	KOG1721,FOG: Zn-finger;COG5048,FOG: Zn-finger	GO:0003676,molecular_function,nucleic acid binding	-
RP11-366F6.2	1.34496	0.206207	2.58434	0.919398	0.0433314	0.0692554	ENSG00000229967	G3SFW4,Uncharacterized protein	-	-	-	-	-	-
ZNF675	3.49978	0.579508	2.58388	3.89007	2.3e-09	1.96e-08	ENSG00000197372	G3SDL9,Zinc finger protein 675	-	PF00096,Zinc finger, C2H2 type;PF01352,KRAB box	IPR013087,Zinc finger C2H2-type;IPR001909,Krueppel-associated box;IPR036051,KRAB domain superfamily;IPR036236,Zinc finger C2H2 superfamily	-	GO:0006355,biological_process,regulation of transcription, DNA-templated;GO:0003676,molecular_function,nucleic acid binding;GO:0046872,molecular_function,metal ion binding;GO:0005622,cellular_component,intracellular	-
PHF21A	19.1411	3.19172	2.58311	6.97858	8.9e-25	1.56e-22	ENSG00000135365	H2Q3H3,PHD finger protein 21A	-	PF00628,PHD-finger	IPR001965,Zinc finger, PHD-type;IPR011011,Zinc finger, FYVE/PHD-type;IPR019786,Zinc finger, PHD-type, conserved site;IPR013083,Zinc finger, RING/FYVE/PHD-type;IPR019787,Zinc finger, PHD-finger	ENOG410IREA,-;ENOG41112YM,-	GO:0000118,cellular_component,histone deacetylase complex;GO:0003712,molecular_function,transcription cofactor activity;GO:0042393,molecular_function,histone binding;GO:0046872,molecular_function,metal ion binding;GO:0006355,biological_process,regulation of transcription, DNA-templated;GO:0000977,molecular_function,RNA polymerase II regulatory region sequence-specific DNA binding;GO:0003682,molec…	-
ATP6V1E2	7.46136	1.24044	2.58228	4.58711	1.06e-12	1.92e-11	ENSG00000250565	A0A140VKA8,ATPase, H+ transporting, lysosomal 31kDa, V1 subunit E2	XP_011531452.1,-;XP_011531455.1,-;XP_016860715.1,-;XP_011531451.1,-;XP_005264691.1,-;XP_005264690.1,-;XP_011531454.1,-;NP_001304992.1,V-type proton ATPase subunit E 2;XP_011531450.1,-;XP_016860714.1,-;XP_011531453.1,-	PF01991,ATP synthase (E/31 kDa) subunit	IPR002842,V-type ATPase subunit E;IPR038495,V-type ATPase subunit E, C-terminal domain superfamily	-	GO:0015991,biological_process,ATP hydrolysis coupled proton transport;GO:0033178,cellular_component,proton-transporting two-sector ATPase complex, catalytic domain;GO:0008553,molecular_function,proton-exporting ATPase activity, phosphorylative mechanism;GO:0001669,cellular_component,acrosomal vesicle;GO:0046961,molecular_function,proton-transporting ATPase activity, rotational mechanism	K02150,ko04966,Collecting duct acid secretion;K02150,ko00190,Oxidative phosphorylation;K02150,ko05120,Epithelial cell signaling in Helicobacter pylori infection;K02150,ko04150,mTOR signaling pathway;K02150,ko04721,Synaptic vesicle cycle;K02150,ko04145,Phagosome;K02150,ko05110,Vibrio cholerae infection;K02150,ko05323,Rheumatoid arthritis
NRG4	1.98237	0.325644	2.58083	2.73592	3.27e-05	0.000110587	ENSG00000169752	G3SDI0,Neuregulin 4	XP_004056614.1,pro-neuregulin-4, membrane-bound isoform	PF00008,-like domain	IPR013032,EGF-like, conserved site;IPR000742,EGF-like domain	-	GO:0016021,cellular_component,integral component of membrane;GO:0016020,cellular_component,membrane	K05458,ko04012,ErbB signaling pathway
MMP16	0.823221	0.13523	2.58083	2.73592	3.27e-05	0.000110587	ENSG00000156103	G3S039,Matrix metalloproteinase	-	PF00413,Matrixin;PF01471,Putative peptidoglycan binding domain;PF11857,omain of unknown function (DUF3377);PF00045,Hemopexin	IPR001818,Peptidase M10, metallopeptidase;IPR018486,Hemopexin, conserved site;IPR036375,Hemopexin-like domain superfamily;IPR036365,PGBD-like superfamily;IPR021190,Peptidase M10A;IPR000585,Hemopexin-like domain;IPR024079,Metallopeptidase, catalytic domain superfamily;IPR006026,Peptidase, metallopeptidase;IPR021805,Peptidase M10A, matrix metallopeptidase, C-terminal;IPR018487,Hemopexin-like repeat…	-	GO:0006508,biological_process,proteolysis;GO:0016787,molecular_function,hydrolase activity;GO:0001503,biological_process,ossification;GO:0030574,biological_process,collagen catabolic process;GO:0008237,molecular_function,metallopeptidase activity;GO:0070006,molecular_function,metalloaminopeptidase activity;GO:0016020,cellular_component,membrane;GO:0016485,biological_process,protein processing;GO:…	K07996,ko05206,MicroRNAs in cancer
CCDC169-SOHLH2	8.68333	1.43782	2.58041	3.50141	9.38e-08	5.54e-07	ENSG00000250709	H2Q7F1,Uncharacterized protein	XP_509628.2,spermatogenesis- and oogenesis-specific basic helix-loop-helix-containing protein 2	PF15372,omain of unknown function (DUF4600);PF00010,Helix-loop-helix DNA-binding domain	IPR011598,Myc-type, basic helix-loop-helix (bHLH) domain;IPR036638,Helix-loop-helix DNA-binding domain superfamily;IPR032669,Spermatogenesis- and oogenesis-specific basic helix-loop-helix-containing protein 2	ENOG410IUEE,-;ENOG410ZGUF,-	GO:0007283,biological_process,spermatogenesis;GO:0006366,biological_process,transcription by RNA polymerase II;GO:0046983,molecular_function,protein dimerization activity;GO:0001228,molecular_function,transcriptional activator activity, RNA polymerase II transcription regulatory region sequence-specific DNA binding;GO:0045944,biological_process,positive regulation of transcription by RNA polymera…	-
MAP2K5	5.09753	0.846676	2.58024	3.99547	6.26e-10	6.06e-09	ENSG00000137764	H2Q9P0,Mitogen-activated protein kinase kinase 5	XP_001174814.1,-	PF00069,Protein kinase domain;PF00564,PB1 domain	IPR034851,Dual specificity mitogen-activated protein kinase kinase 5, PB1 domain;IPR000270,PB1 domain;IPR011009,Protein kinase-like domain superfamily;IPR017441,Protein kinase, ATP binding site;IPR008271,Serine/threonine-protein kinase, active site;IPR000719,Protein kinase domain	KOG0581,Mitogen-activated protein kinase kinase (MAP2K);ENOG410XQ5A,-	GO:0032147,biological_process,activation of protein kinase activity;GO:0007346,biological_process,regulation of mitotic cell cycle;GO:0016301,molecular_function,kinase activity;GO:0031098,biological_process,stress-activated protein kinase signaling cascade;GO:0007507,biological_process,heart development;GO:0042981,biological_process,regulation of apoptotic process;GO:0000165,biological_process,MA…	-
KIAA2026	11.3789	1.9007	2.57902	5.74886	5.82e-19	3.87e-17	ENSG00000183354	K7C0W9,KIAA2026	XP_016816049.1,uncharacterized protein KIAA2026 homolog isoform X1	-	IPR036427,Bromodomain-like superfamily	ENOG410YKW1,-;ENOG410IIP1,-	-	-
RBMS1	14.6533	2.45086	2.57843	6.66915	1.99e-23	2.78e-21	ENSG00000153250	G1QMS2,RNA binding motif single stranded interacting protein 1	XP_003266209.1,RNA-binding motif, single-stranded-interacting protein 1 isoform X7	PF00076,RNA recognition motif. (a.k.a. RRM, RBD, or RNP domain)	IPR002343,Paraneoplastic encephalomyelitis antigen;IPR012677,Nucleotide-binding alpha-beta plait domain superfamily;IPR035979,RNA-binding domain superfamily;IPR000504,RNA recognition motif domain;IPR034404,MSSP-1, RNA recognition motif 1	ENOG410XRB5,-;KOG4733,FOG: RRM domain	GO:0003723,molecular_function,RNA binding;GO:0003676,molecular_function,nucleic acid binding	-
R3HDM2	59.3349	9.93592	2.57745	7.68388	3.62e-27	7.82e-25	ENSG00000179912	B5MCG9,R3H domain-containing protein 2	NP_001317051.1,-;NP_001317050.1,R3H domain-containing protein 2 isoform 1	PF01424,R3H domain	IPR001374,R3H domain;IPR024771,SUZ domain;IPR036867,R3H domain superfamily	ENOG410IS8W,-;ENOG41106PI,-	GO:0003676,molecular_function,nucleic acid binding	-
FOXO1	4.41999	0.736086	2.57711	4.09362	1.8e-10	1.94e-09	ENSG00000150907	H2Q7G4,Forkhead box O1	XP_522749.3,-	PF00250,orkhead domain;PF16675,KIX-binding domain of forkhead box O, CR2;PF16676,Transactivation domain of FOXO protein family	IPR001766,Fork head domain;IPR032067,FOXO protein, transactivation domain;IPR036388,Winged helix-like DNA-binding domain superfamily;IPR030456,Fork head domain conserved site 2;IPR036390,Winged helix DNA-binding domain superfamily;IPR032068,FOXO protein, KIX-binding domain	KOG2294,Transcription factor of the Forkhead/HNF3 family;COG5025,Transcription factor of the Forkhead/HNF3 family	GO:0043565,molecular_function,sequence-specific DNA binding;GO:0008013,molecular_function,beta-catenin binding;GO:0045732,biological_process,positive regulation of protein catabolic process;GO:0003677,molecular_function,DNA binding;GO:0000981,molecular_function,RNA polymerase II transcription factor activity, sequence-specific DNA binding;GO:0043066,biological_process,negative regulation of apopt…	K07201,ko04152,AMPK signaling pathway;K07201,ko04933,AGE-RAGE signaling pathway in diabetic complications;K07201,ko05202,Transcriptional misregulation in cancer;K07201,ko04211,Longevity regulating pathway;K07201,ko04919,Thyroid hormone signaling pathway;K07201,ko05215,Prostate cancer;K07201,ko04068,FoxO signaling pathway;K07201,ko04922,Glucagon signaling pathway;K07201,ko04931,Insulin resistance;…
[truncated: 7,337 more rows]
